# Supplementary material for: Copper-cascade catalysis: synthesis of 3-functionalized indoles
Source: Royal Society of Chemistry journal article supplement (doi:10.1039/c0cc04922k), 2011-01-01

***Supporting Information***  
for  
***Copper-Cascade Catalysis: Synthesis of  
3-Functionalized Indoles***

Jing Wang, Jinjin Wang, Yuanxun Zhu, Ping Lu\* and Yanguang Wang\*

Department of Chemistry, Zhejiang University, Hangzhou 310027, China

|                                                                |          |
|----------------------------------------------------------------|----------|
| General Considerations                                         | S2       |
| General Procedure for the synthesis of 4                       | S2       |
| Characterization Data for 4                                    | S3-S13   |
| General Procedure for the synthesis of 5 and 6                 | S14      |
| Characterization Data for 5 and 6                              | S14-S23  |
| General Procedure for the synthesis of 7                       | S23-S25  |
| General procedure for the synthesis of 8                       | S25-S26  |
| References and Notes                                           | S27      |
| Copies of <sup>1</sup> H and <sup>13</sup> C-NMR Spectral Data | S27-S101 |

## General Considerations

Infrared spectras were obtained on a FTIR spectrometer.  $^1\text{H}$  NMR spectras were recorded on 500 MHz spectrometer. The chemical shifts were reported relative to internal standard TMS (0) in  $\text{CDCl}_3$  or 2.5 in  $\text{DMSO-}d_6$ . The following abbreviations were used to describe peak patterns where appropriate: b = broad, s = singlet, d = doublet, t = triplet, q = quartet, m = multiplet. Coupling constants were reported in Hertz (Hz).  $^{13}\text{C}$  NMR were recorded on 125 MHz spectrometer, referred to the internal solvent signals (77.0 ppm for  $\text{CDCl}_3$  or 40.0 ppm for  $\text{DMSO-}d_6$ ). MS and HRMS were obtained using ESI ionization. Melting points were measured with micro melting point apparatus. Sulfonyl azides were prepared according the published methods.<sup>1,2</sup>

## General Procedure for the synthesis of 4

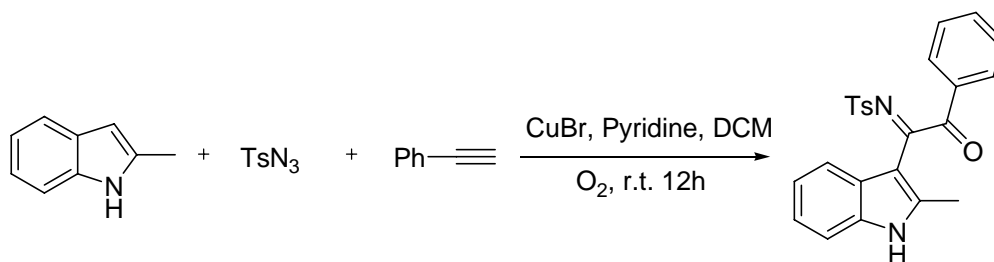

To a solution of 2-methyl indole (0.5 mmol), sulfonyl azide (1 mmol) and CuBr (0.05 mmol) in DCM (0.8 mL) in Schlenk tube was added the mixture of alkynes (1 mmol) and pyridine (1 mmol) in DCM (0.8 mL) slowly via syringe. The reaction mixture was stirred at room temperature for 12 h under oxygen. The solution was diluted by DCM (3 mL) and quenched by a mixture of 1N HCl and saturated  $\text{NH}_4\text{Cl}$ . The aqueous layer was extracted by DCM and the combined organic layer was washed with  $\text{NH}_4\text{Cl}$  (10 mL), brine (10 mL) and dried over anhydrous sodium sulfate. The solvent was removed in vacuum, and the residue was purified by column chromatography on silica gel to give corresponding products. All the compounds were further recrystallized from EA.

### Characterization Data for 4

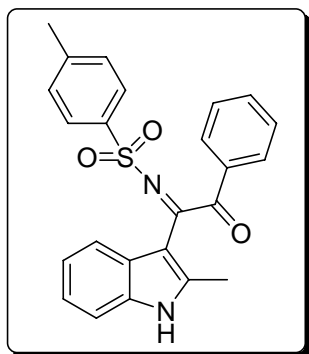

#### **4-methyl-N-(1-(2-methyl-1*H*-indol-3-yl)-2-oxo-2-phenylethylidene)benzenesulfonamide (4a)**

Yellow solid; mp. 227-228 °C; <sup>1</sup>H NMR (DMSO-*d*<sub>6</sub>) δ 12.66 (s, 1H), 7.92-7.90 (m, 3H), 7.73-7.70 (m, 3H), 7.58 (t, *J* = 8.0 Hz, 2H), 7.43-7.39 (m, 3H), 7.22-7.13 (m, 2H), 2.37 (s, 3H), 2.34 (s, 3H) ppm; <sup>13</sup>C NMR (DMSO-*d*<sub>6</sub>) δ 197.0, 170.7, 150.5, 143.8, 138.6, 136.1, 135.1, 135.0, 130.2, 129.8, 129.0, 127.1, 126.6, 124.0, 123.4, 121.7, 112.6, 107.9, 21.5, 15.9 ppm; IR (KBr) ν 3270, 3062, 2924, 1675, 1522, 1457, 1284, 1146, 1083, 817, 771, 673 cm<sup>-1</sup>; MS (ESI) *m/z* 439.2 ([M+Na]<sup>+</sup>); HRMS (ESI) calcd for C<sub>24</sub>H<sub>20</sub>N<sub>2</sub>O<sub>3</sub>S ([M+Na]<sup>+</sup>), 439.1087; found, 439.1079.

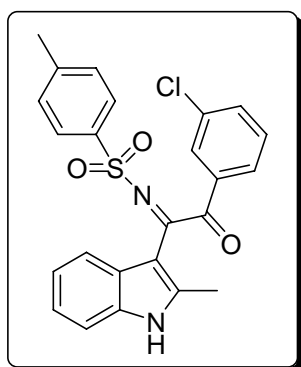

#### **N-(2-(3-chlorophenyl)-1-(2-methyl-1*H*-indol-3-yl)-2-oxoethylidene)-4-methylbenzenesulfonamide (4b)**

Yellow solid; mp. 211-212 °C; <sup>1</sup>H NMR (CDCl<sub>3</sub>) δ 9.83 (s, 1H), 7.95-7.90 (m, 2H), 7.78 (d, *J* = 8.0 Hz, 2H), 7.75 (d, *J* = 8.0 Hz, 1H), 7.43 (d, *J* = 8.0 Hz, 1H), 7.25-7.21 (m, 4H), 7.11-7.09 (m, 2H), 2.38 (s, 3H), 2.26 (s, 3H) ppm; <sup>13</sup>C NMR (CDCl<sub>3</sub>) δ 196.0, 170.0, 149.6, 143.8, 137.7, 136.4, 135.4, 135.3, 134.2, 130.4, 129.6, 128.3,

127.3, 127.1, 126.4, 123.9, 123.5, 122.0, 111.7, 108.6, 21.5, 16.0 ppm; IR (KBr)  $\nu$  3277, 3063, 2924, 1684, 1515, 1457, 1257, 1146, 1083, 822, 785, 752  $\text{cm}^{-1}$ ; MS (ESI)  $m/z$  450.9 ( $[\text{M}+\text{Na}]^+$ ); HRMS (ESI) calcd for  $\text{C}_{24}\text{H}_{19}\text{ClN}_2\text{O}_3\text{S}$  ( $[\text{M}+\text{Na}]^+$ ), 473.0697; found, 473.0685.

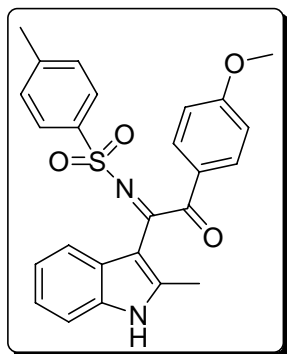

***N*-(2-(4-methoxyphenyl)-1-(2-methyl-1*H*-indol-3-yl)-2-oxoethylidene)-4-methylbenzenesulfonamide (4c)**

Yellow oil;  $^1\text{H}$  NMR ( $\text{CDCl}_3$ )  $\delta$  9.93 (s, 1H), 8.01 (b, 1H), 7.85-7.82 (m, 4H), 7.24-7.18 (m, 3H), 7.09-7.05 (m, 2H), 6.71 (d,  $J=8.5$  Hz, 2H), 3.67 (s, 3H), 2.36 (s, 3H), 2.22 (s, 3H) ppm;  $^{13}\text{C}$  NMR ( $\text{CDCl}_3$ )  $\delta$  195.1, 171.3, 164.4, 149.6, 143.4, 138.2, 135.4, 131.4, 129.4, 128.1, 127.1, 126.6, 123.6, 123.2, 122.1, 114.2, 111.7, 108.8, 55.4, 21.5, 15.6 ppm; IR (KBr)  $\nu$  3283, 3053, 2932, 2841, 1671, 1597, 1513, 1457, 1260, 1147, 1084, 820, 787, 673, 556  $\text{cm}^{-1}$ ; MS (ESI)  $m/z$  445.1 ( $[\text{M}-\text{H}]^-$ ); HRMS (ESI) calcd for  $\text{C}_{25}\text{H}_{22}\text{N}_2\text{O}_4\text{S}$  ( $[\text{M}+\text{H}]^+$ ), 447.1373; found, 447.1367.

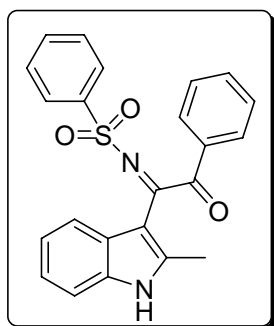

***N*-(1-(2-methyl-1*H*-indol-3-yl)-2-oxo-2-phenylethylidene)benzenesulfonamide (4d)**

Yellow solid; mp. 119-120  $^{\circ}\text{C}$ ;  $^1\text{H}$  NMR ( $\text{CDCl}_3$ )  $\delta$  9.89 (s, 1H), 7.97-7.88 (m, 5H),

7.51 (t,  $J = 7.0$  Hz, 1H), 7.45-7.42 (m, 3H), 7.29 (t,  $J = 7.5$  Hz, 2H), 7.22-7.20 (m, 1H), 7.09-7.07 (m, 2H), 2.19 (s, 3H) ppm;  $^{13}\text{C}$  NMR ( $\text{CDCl}_3$ )  $\delta$  196.9, 171.4, 149.8, 140.9, 135.4, 134.8, 134.4, 132.7, 128.9, 128.8, 127.0, 126.5, 123.8, 123.4, 122.1, 111.7, 108.8, 15.8 ppm; IR (KBr)  $\nu$  3273, 3058, 2973, 2927, 1679, 1525, 1458, 1285, 1257, 1236, 1147, 1082, 813, 774, 752, 687, 555  $\text{cm}^{-1}$ ; MS (ESI)  $m/z$  403.0 ( $[\text{M}+\text{H}]^+$ ); HRMS (ESI) calcd for  $\text{C}_{23}\text{H}_{18}\text{N}_2\text{O}_3\text{S}$  ( $[\text{M}+\text{Na}]^+$ ), 425.0930; found, 425.0915.

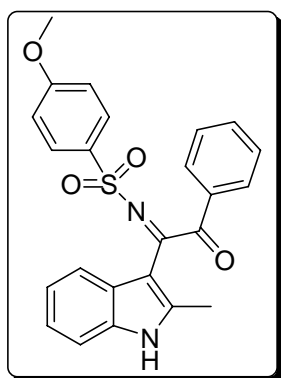

**4-methoxy-*N*-(1-(2-methyl-1*H*-indol-3-yl)-2-oxo-2-phenylethylidene)benzenesulfonamide (4e)**

Yellow solid; mp. 242-243 °C;  $^1\text{H}$  NMR ( $\text{DMSO}-d_6$ )  $\delta$  12.6 (s, 1H), 7.90-7.89 (m, 3H), 7.75 (d,  $J = 8.5$  Hz, 2H), 7.72 (t,  $J = 7.5$  Hz, 1H), 7.59 (t,  $J = 7.5$  Hz, 2H), 7.41 (d,  $J = 8.0$  Hz, 1H), 7.20 (t,  $J = 7.5$  Hz, 1H), 7.16-7.11 (m, 3H), 3.83 (s, 3H), 2.32 (s, 3H) ppm;  $^{13}\text{C}$  NMR ( $\text{DMSO}-d_6$ )  $\delta$  197.1, 170.3, 163.1, 150.2, 136.1, 135.1, 135.0, 133.0, 129.8, 129.3, 129.0, 126.7, 124.0, 123.4, 121.6, 114.9, 112.5, 107.8, 56.2, 15.8 ppm; IR (KBr)  $\nu$  3257, 2928, 2840, 1675, 1595, 1458, 1287, 1260, 1144, 1085, 813, 770, 561  $\text{cm}^{-1}$ ; MS (ESI)  $m/z$  433.2 ( $[\text{M}+\text{H}]^+$ ); HRMS (ESI) calcd for  $\text{C}_{24}\text{H}_{20}\text{N}_2\text{O}_4\text{S}$  ( $[\text{M}+\text{Na}]^+$ ), 455.1036; found, 455.1032.

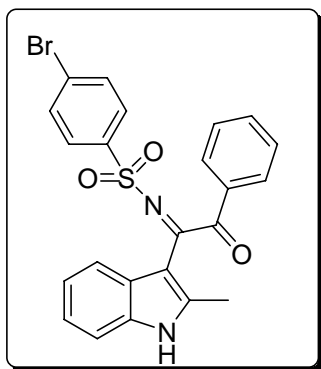

**4-bromo-N-(1-(2-methyl-1H-indol-3-yl)-2-oxo-2-phenylethylidene)benzenesulfonamide (4f)**

Yellow solid; mp. 227-228 °C;  $^1\text{H}$  NMR ( $\text{CDCl}_3$ )  $\delta$  9.86 (s, 1H), 7.99 (b, 1H), 7.89 (d,  $J = 6.0$  Hz, 2H), 7.77 (d,  $J = 8.5$  Hz, 2H), 7.57 (d,  $J = 9.0$  Hz, 2H), 7.46 (t,  $J = 7.5$  Hz, 1H), 7.31 (t,  $J = 8.0$  Hz, 2H), 7.22-7.20 (m, 1H), 7.12-7.10 (m, 2H), 2.21 (s, 3H) ppm;  $^{13}\text{C}$  NMR ( $\text{CDCl}_3$ )  $\delta$  196.8, 171.6, 150.2, 139.9, 135.4, 134.7, 134.5, 132.1, 129.0, 128.9, 128.6, 127.7, 126.4, 124.0, 123.6, 122.1, 111.7, 109.0, 15.9 ppm; IR (KBr)  $\nu$  3274, 3059, 2970, 1678, 1456, 1258, 1145, 1081, 814, 775, 752, 554  $\text{cm}^{-1}$ ; MS (ESI)  $m/z$  481.1 ( $[\text{M}+\text{H}]^+$ ); HRMS (ESI) calcd for  $\text{C}_{23}\text{H}_{17}\text{BrN}_2\text{O}_3\text{S}$  ( $[\text{M}+\text{Na}]^+$ ), 503.0035; found, 503.0024.

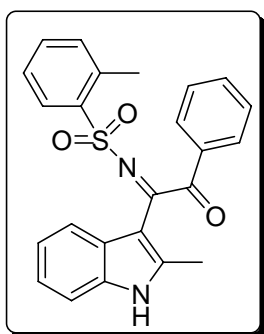

**2-methyl-N-(1-(2-methyl-1H-indol-3-yl)-2-oxo-2-phenylethylidene)benzenesulfonamide (4g)**

Pale yellow solid; mp. 204-205 °C;  $^1\text{H}$  NMR ( $\text{DMSO-}d_6$ )  $\delta$  12.70 (s, 1H), 7.88 (m, 3H), 7.71 (t,  $J = 7.5$  Hz, 1H), 7.63 (d,  $J = 8.0$  Hz, 1H), 7.58-7.52 (m, 3H), 7.42 (d,  $J = 8.0$  Hz, 2H), 7.34 (t,  $J = 7.5$  Hz, 1H), 7.21 (t,  $J = 7.5$  Hz, 1H), 7.16-7.14 (m, 1H), 2.75 (s, 3H), 2.34 (s, 3H) ppm;  $^{13}\text{C}$  NMR ( $\text{DMSO-}d_6$ )  $\delta$  196.5, 171.3, 150.6, 139.8, 137.6,

136.1, 135.0, 134.9, 133.4, 132.8, 129.7, 129.1, 128.0, 126.7, 126.6, 124.1, 123.4, 121.4, 112.6, 108.1, 20.4, 15.9 ppm; IR (KBr)  $\nu$  3339, 3060, 2928, 1679, 1524, 1457, 1305, 1260, 1153, 1127, 1062, 813, 760, 690, 548  $\text{cm}^{-1}$ ; MS (ESI)  $m/z$  417.2 ( $[\text{M}+\text{H}]^+$ ); HRMS (ESI) calcd for  $\text{C}_{24}\text{H}_{20}\text{N}_2\text{O}_3\text{S}$  ( $[\text{M}+\text{Na}]^+$ ), 439.1087; found, 439.1078.

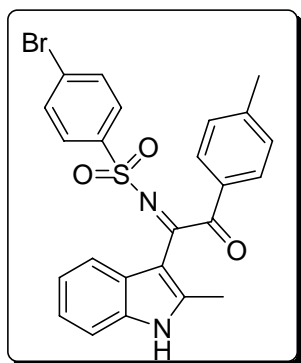

**4-bromo-N-(1-(2-methyl-1H-indol-3-yl)-2-oxo-2-p-tolyloethylidene)benzenesulfonamide (4h)**

Yellow solid; mp. 216-217 °C;  $^1\text{H}$  NMR ( $\text{CDCl}_3$ )  $\delta$  9.90 (s, 1H), 7.98 (b, 1H), 7.79-7.76 (m, 4H), 7.58-7.56 (m, 2H), 7.20-7.18 (m, 1H), 7.12-7.06 (m, 4H), 2.23 (s, 3H), 2.21 (s, 3H) ppm;  $^{13}\text{C}$  NMR ( $\text{CDCl}_3$ )  $\delta$  196.2, 171.8, 150.2, 145.9, 140.1, 135.4, 132.3, 132.1, 129.7, 129.0, 128.6, 127.6, 126.5, 123.9, 123.5, 122.1, 111.8, 109.0, 21.7, 15.8 ppm; IR (KBr)  $\nu$  3272, 3059, 2924, 1674, 1603, 1518, 1454, 1311, 1266, 1144, 1082, 1008, 805, 745, 632, 539  $\text{cm}^{-1}$ ; MS (ESI)  $m/z$  493.3 ( $[\text{M}-\text{H}]^-$ ); HRMS (ESI) calcd for  $\text{C}_{24}\text{H}_{19}\text{BrN}_2\text{O}_3\text{S}$  ( $[\text{M}+\text{Na}]^+$ ), 517.0192; found, 517.0180.

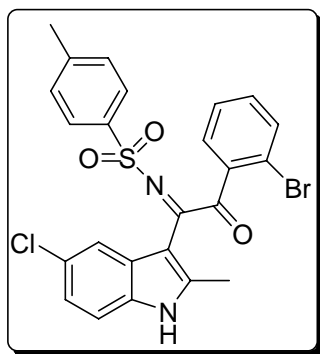

**N-(2-(2-bromophenyl)-1-(5-chloro-2-methyl-1H-indol-3-yl)-2-oxoethylidene)-4-methylbenzenesulfonamide**

**ethylbenzenesulfonamide (4i)**

Yellow solid; mp. 244-245 °C;  $^1\text{H}$  NMR (DMSO- $d_6$ )  $\delta$  12.80 (s, 1H), 7.90-7.88 (m, 3H), 7.71 (d,  $J=7.5$  Hz, 2H), 7.62-7.54 (m, 2H), 7.43 (t,  $J = 8.0$  Hz, 3H), 7.24 (d,  $J = 8.5$  Hz, 1H), 2.38 (s, 3H), 2.32 (s, 3H) ppm;  $^{13}\text{C}$  NMR (DMSO- $d_6$ )  $\delta$  195.0, 169.9, 151.3, 144.1, 138.1, 136.3, 136.2, 135.9, 134.7, 134.5, 132.9, 130.2, 128.9, 128.0, 127.9, 127.2, 124.0, 122.1, 120.1, 114.1, 107.6, 21.5, 15.7 ppm; IR (KBr)  $\nu$  3292, 2923, 2853, 1581, 1524, 1459, 1287, 1146, 1084, 810, 773, 544  $\text{cm}^{-1}$ ; MS (ESI)  $m/z$  529.0 ( $[\text{M}+\text{H}]^+$ ); HRMS (ESI) calcd for  $\text{C}_{24}\text{H}_{18}\text{BrClN}_2\text{O}_3\text{S}$  ( $[\text{M}+\text{Na}]^+$ ), 550.9802; found, 550.9798.

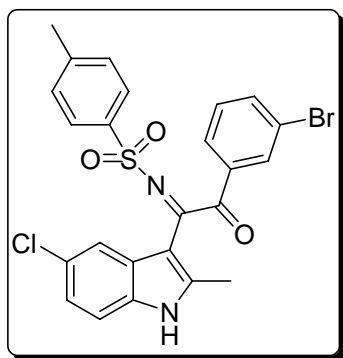

***N*-(2-(3-bromophenyl)-1-(5-chloro-2-methyl-1*H*-indol-3-yl)-2-oxoethylidene)-4-methylbenzenesulfonamide (4j)**

Yellow oil;  $^1\text{H}$  NMR ( $\text{CDCl}_3$ )  $\delta$  10.03 (s, 1H), 8.03-7.99 (m, 2H), 7.79-7.78 (m, 3H), 7.59-7.57 (m, 1H), 7.28 (d,  $J = 8.0$  Hz, 2H), 7.18 (t,  $J = 7.5$  Hz, 1H), 7.13 (d,  $J = 8.0$  Hz, 1H), 7.08-7.06 (m, 1H), 2.40 (s, 3H), 2.18 (s, 3H) ppm;  $^{13}\text{C}$  NMR ( $\text{CDCl}_3$ )  $\delta$  195.4, 169.7, 150.4, 144.1, 137.3, 137.2, 136.3, 133.7, 131.2, 130.6, 129.7, 129.3, 127.6, 127.1, 124.3, 123.5, 122.0, 112.7, 108.2, 21.6, 15.7 ppm; IR (KBr)  $\nu$  3279, 3063, 2923, 2852, 1689, 1523, 1456, 1350, 1288, 1229, 1148, 1084, 824, 787, 545  $\text{cm}^{-1}$ ; MS (ESI)  $m/z$  528.8 ( $[\text{M}+\text{H}]^+$ ); HRMS (ESI) calcd for  $\text{C}_{24}\text{H}_{18}\text{BrClN}_2\text{O}_3\text{S}$  ( $[\text{M}+\text{Na}]^+$ ), 550.9802; found, 550.9798.



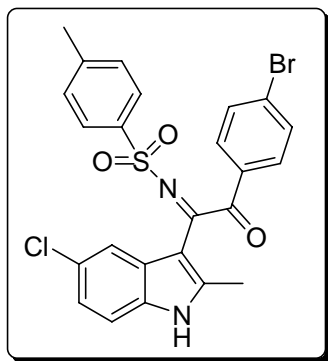

***N*-(2-(4-bromophenyl)-1-(5-chloro-2-methyl-1*H*-indol-3-yl)-2-oxoethylidene)-4-methylbenzenesulfonamide (4k)**

Yellow oil;  $^1\text{H}$  NMR ( $\text{CDCl}_3$ )  $\delta$  9.84 (s, 1H), 8.02 (br, 1H), 7.80 (d,  $J = 8.5$  Hz, 2H), 7.73 (d,  $J = 8.0$  Hz, 2H), 7.48 (d,  $J = 8.5$  Hz, 2H), 7.29 (d,  $J = 8.0$  Hz, 2H), 7.13 (d,  $J = 8.5$  Hz, 1H), 7.09 (m, 1H), 2.41 (s, 3H), 2.21 (s, 3H) ppm;  $^{13}\text{C}$  NMR ( $\text{CDCl}_3$ )  $\delta$  195.7, 170.0, 149.8, 144.1, 137.3, 133.6, 133.5, 132.4, 130.2, 130.1, 129.7, 129.3, 127.6, 127.2, 124.3, 122.0, 112.5, 108.2, 21.6, 15.7 ppm; IR (KBr)  $\nu$  3275, 2982, 2926, 1732, 1713, 1684, 1584, 1457, 1288, 1244, 1149, 1084, 807, 545  $\text{cm}^{-1}$ ; MS (ESI)  $m/z$  528.9 ( $[\text{M}+\text{H}]^+$ ); HRMS (ESI) calcd for  $\text{C}_{24}\text{H}_{18}\text{BrClN}_2\text{O}_3\text{S}$  ( $[\text{M}+\text{Na}]^+$ ), 550.9802; found, 550.9798.

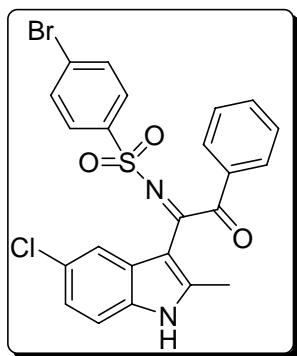

**4-bromo-*N*-(1-(5-chloro-2-methyl-1*H*-indol-3-yl)-2-oxo-2-phenylethylidene)benzenesulfonamide (4l)**

Orange solid; mp. 220-221  $^\circ\text{C}$ ;  $^1\text{H}$  NMR ( $\text{CDCl}_3$ )  $\delta$  9.65 (s, 1H), 8.05 (b, 1H), 7.87 (d,  $J = 7.5$  Hz, 2H), 7.80-7.78 (m, 2H), 7.63-7.61 (m, 2H), 7.51 (t,  $J = 7.5$  Hz, 1H), 7.36 (t,  $J = 7.5$  Hz, 2H), 7.16-7.09 (m, 2H), 2.20 (s, 3H) ppm;  $^{13}\text{C}$  NMR ( $\text{CDCl}_3$ )  $\delta$  196.3, 171.4, 150.3, 139.6, 134.7, 134.5, 133.6, 132.3, 129.5, 129.1, 128.9, 128.8, 128.1, 127.6, 124.4, 122.1, 112.5, 108.6, 15.7 ppm; IR (KBr)  $\nu$  3282, 3093, 2925, 1677, 1577,

1454, 1350, 1307, 1232, 1147, 1083, 815, 778, 740  $\text{cm}^{-1}$ ; MS (ESI)  $m/z$  513.5 ( $[\text{M}+\text{H}]^+$ ); HRMS (ESI) calcd for  $\text{C}_{23}\text{H}_{16}\text{BrClN}_2\text{O}_3\text{S}$  ( $[\text{M}+\text{Na}]^+$ ), 536.9646; found, 536.9653.

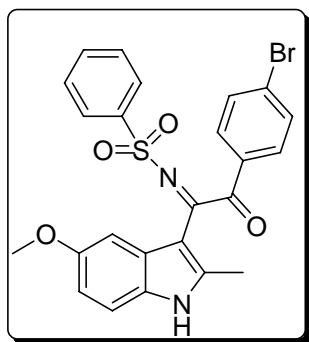

***N*-(2-(4-bromophenyl)-1-(5-methoxy-2-methyl-1*H*-indol-3-yl)-2-oxoethylidene)benzenesulfonamide (4m)**

Yellow solid; mp. 165-166 °C;  $^1\text{H}$  NMR ( $\text{CDCl}_3$ )  $\delta$  9.65 (s, 1H), 7.94 (d,  $J=7.0$  Hz, 2H), 7.79 (d,  $J=8.0$  Hz, 2H), 7.54-7.45 (m, 6H), 7.09 (d,  $J=8.5$  Hz, 1H), 6.74-6.72 (m, 1H), 3.65 (s, 3H), 2.21 (s, 3H) ppm;  $^{13}\text{C}$  NMR ( $\text{CDCl}_3$ )  $\delta$  195.7, 170.2, 156.7, 149.3, 141.1, 133.6, 132.8, 132.4, 130.3, 129.9, 129.9, 128.9, 127.5, 127.0, 113.4, 112.3, 108.8, 104.8, 55.4, 15.8  $\text{cm}^{-1}$ ; IR (KBr)  $\nu$  3378, 2925, 1680, 1586, 1461, 1303, 1281, 1149, 1084, 815, 554  $\text{cm}^{-1}$ ; MS (ESI)  $m/z$  511.0 ( $[\text{M}+\text{H}]^+$ ); HRMS (ESI) calcd for  $\text{C}_{24}\text{H}_{19}\text{BrN}_2\text{O}_4\text{S}$  ( $[\text{M}+\text{Na}]^+$ ), 533.0141; found, 533.0127.

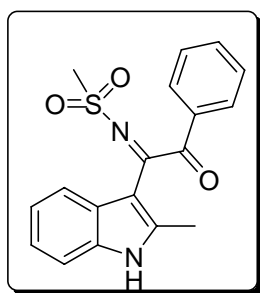

***N*-(1-(2-methyl-1*H*-indol-3-yl)-2-oxo-2-phenylethylidene)methanesulfonamide (4n)**

Yellow solid; mp. 191-192 °C;  $^1\text{H}$  NMR ( $\text{CDCl}_3$ )  $\delta$  9.94 (s, 1H), 8.10 (b, 1H), 7.87 (d,  $J=8.0$  Hz, 2H), 7.42 (t,  $J=7.5$  Hz, 1H), 7.29-7.26 (m, 3H), 7.15-7.14 (m, 2H), 3.17

(s, 3H), 2.20 (s, 3H) ppm;  $^{13}\text{C}$  NMR ( $\text{CDCl}_3$ )  $\delta$  196.5, 172.5, 149.8, 135.5, 134.7, 134.5, 128.9, 126.5, 123.9, 123.4, 122.1, 111.8, 108.6, 42.7, 15.6 ppm; IR (KBr)  $\nu$  3361, 3057, 2975, 1675, 1527, 1458, 1291, 1127, 966, 817, 749, 517  $\text{cm}^{-1}$ ; MS (ESI)  $m/z$  339.0 ( $[\text{M}-\text{H}]^-$ ); HRMS (ESI) calcd for  $\text{C}_{18}\text{H}_{16}\text{N}_2\text{O}_3\text{S}$  ( $[\text{M}+\text{Na}]^+$ ), 363.0774; found, 363.0775.

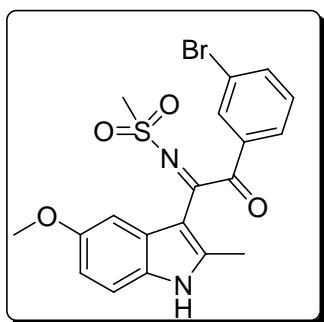

***N*-(2-(3-bromophenyl)-1-(5-methoxy-2-methyl-1*H*-indol-3-yl)-2-oxoethylidene)methanesulfonamide (4o)**

Orange solid; mp. 213-214  $^{\circ}\text{C}$ ;  $^1\text{H}$  NMR ( $\text{DMSO}-d_6$ )  $\delta$  12.57 (s, 1H), 8.02 (s, 1H), 7.92 (d,  $J = 8.0$  Hz, 1H), 7.87 (d,  $J = 7.5$  Hz, 1H), 7.55-7.34 (m, 3H), 6.88-6.86 (m, 1H), 3.73 (s, 3H), 3.18 (s, 3H), 2.33 (s, 3H) ppm;  $^{13}\text{C}$  NMR ( $\text{DMSO}-d_6$ )  $\delta$  195.6, 170.1, 156.5, 150.1, 137.6, 136.9, 132.1, 130.7, 130.6, 128.6, 127.5, 123.0, 113.3, 112.5, 107.3, 105.0, 55.7, 42.8, 16.0 ppm; IR (KBr)  $\nu$  3308, 2928, 1675, 1592, 1468, 1282, 1121, 965, 832, 543  $\text{cm}^{-1}$ ; MS (ESI)  $m/z$  449.0 ( $[\text{M}+\text{H}]^+$ ); HRMS (ESI) calcd for  $\text{C}_{19}\text{H}_{17}\text{BrN}_2\text{O}_4\text{S}$  ( $[\text{M}+\text{Na}]^+$ ), 470.9985; found, 470.9973.

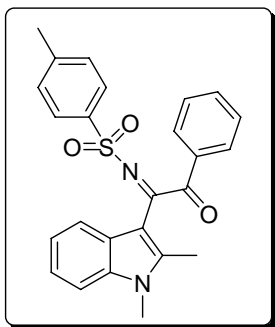

***N*-(1-(1,2-dimethyl-1*H*-indol-3-yl)-2-oxo-2-phenylethylidene)-4-methylbenzenesul**

### fonamide (4p)

Pale yellow solid; mp. 225-226 °C;  $^1\text{H}$  NMR ( $\text{CDCl}_3$ )  $\delta$  8.00 (d,  $J=7.0$  Hz, 2H), 7.96-7.95 (b, 1H), 7.83 (d,  $J=8.5$  Hz, 2H), 7.57 (t,  $J=7.5$  Hz, 1H), 7.45 (t,  $J=8.0$  Hz, 2H), 7.26-7.12 (m, 5H), 3.59 (s, 3H), 2.42 (s, 3H), 2.38 (s, 3H) ppm;  $^{13}\text{C}$  NMR ( $\text{CDCl}_3$ )  $\delta$  197.3, 170.5, 148.9, 143.2, 138.2, 137.3, 135.2, 134.1, 129.4, 129.0, 128.9, 127.4, 125.9, 123.5, 123.4, 122.1, 109.7, 108.5, 30.2, 21.5, 13.6  $\text{cm}^{-1}$ ; IR (KBr)  $\nu$  3449, 3060, 2925, 1679, 1504, 1469, 1410, 1302, 1150, 1082, 819, 739, 673, 561, 540  $\text{cm}^{-1}$ ; MS (ESI)  $m/z$  430.9 ( $[\text{M}+\text{H}]^+$ ); HRMS (ESI) calcd for  $\text{C}_{25}\text{H}_{22}\text{N}_2\text{O}_3\text{S}$  ( $[\text{M}+\text{Na}]^+$ ), 453.1243; found, 453.1233.

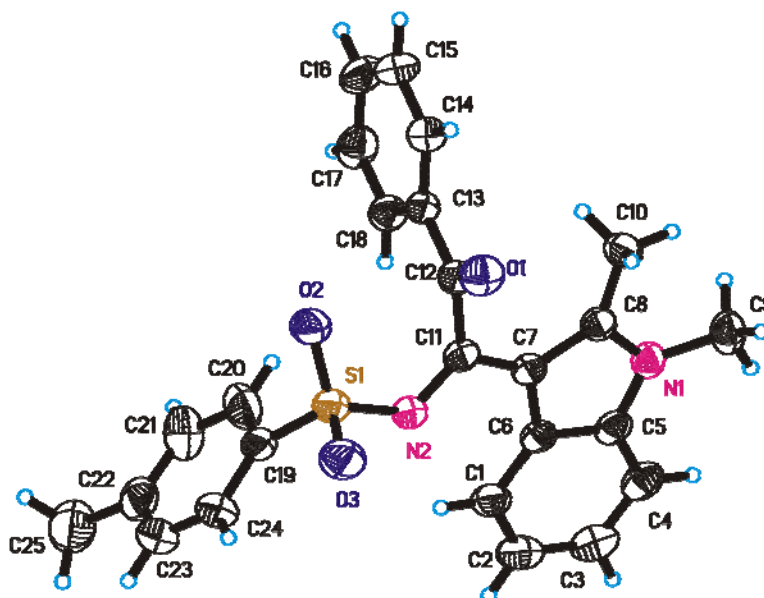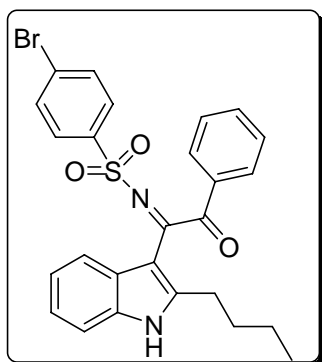

**4-bromo-*N*-(1-(2-butyl-1*H*-indol-3-yl)-2-oxo-2-phenylethylidene)benzenesulfonamide (4q)**

Orange oil;  $^1\text{H}$  NMR (DMSO- $d_6$ )  $\delta$  12.73 (s, 1H), 7.91 (d,  $J$  =7.0 Hz, 2H), 7.85-7.83 (m, 2H), 7.75-7.58 (m, 6H), 7.42 (d,  $J$  =7.5 Hz, 1H), 7.19 (t,  $J$  =7.0 Hz, 1H), 7.10-7.09 (m, 1H), 2.81 (br, 2H), 1.45-1.30 (m, 2H), 1.13 (br, 2H), 0.73 (t,  $J$  =7.5Hz, 3H) ppm;  $^{13}\text{C}$  NMR (DMSO- $d_6$ )  $\delta$  196.6, 171.0, 155.4, 140.7, 136.4, 135.2, 134.9, 132.9, 129.8, 129.1, 129.0, 127.3, 126.3, 124.0, 123.4, 121.2, 122.9, 107.2, 31.2, 29.0, 22.5, 13.9  $\text{cm}^{-1}$ ; IR (KBr)  $\nu$  3283, 3089, 2957, 2923, 2852, 1678, 1517, 1451, 1148, 1082, 813, 773, 546  $\text{cm}^{-1}$ ; MS (ESI)  $m/z$  522.8 ( $[\text{M}+\text{H}]^+$ ); HRMS (ESI) calcd for  $\text{C}_{26}\text{H}_{23}\text{BrN}_2\text{O}_3\text{S}$  ( $[\text{M}+\text{Na}]^+$ ), 545.0505; found, 545.0509.

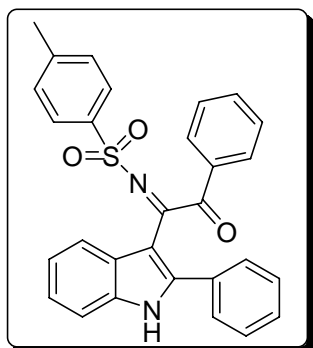

**4-methyl-N-(2-oxo-2-phenyl-1-(2-phenyl-1H-indol-3-yl)ethylidene)benzenesulfonamide (4r)**

Pale yellow solid; mp. 245-246  $^{\circ}\text{C}$ ;  $^1\text{H}$  NMR (DMSO- $d_6$ )  $\delta$  12.79 (s, 1H), 8.20 (d,  $J$  =7.5 Hz, 1H), 7.70 (d,  $J$  =8.5 Hz, 2H), 7.56-7.54 (m, 1H), 7.46-7.42 (m, 3H), 7.35-7.26 (m, 7H), 7.13 (t,  $J$  =7.5 Hz, 2H), 7.00 (d,  $J$  =7.5 Hz, 2H), 2.41 (s, 3H) ppm;  $^{13}\text{C}$  NMR (DMSO- $d_6$ )  $\delta$  194.8, 171.3, 151.4, 143.8, 138.3, 136.5, 135.0, 134.1, 130.9, 130.1, 129.8, 128.8, 128.5, 127.6, 127.2, 126.6, 124.7, 123.8, 122.7, 112.8, 108.9, 21.4 ppm; IR (KBr)  $\nu$  3392, 3263, 3062, 2924, 1677, 1516, 1449, 1432, 1153, 1084, 757, 667, 552, 534  $\text{cm}^{-1}$ ; MS (ESI)  $m/z$  478.9 ( $[\text{M}+\text{H}]^+$ ); HRMS (ESI) calcd for  $\text{C}_{29}\text{H}_{22}\text{N}_2\text{O}_3\text{S}$  ( $[\text{M}+\text{Na}]^+$ ), 501.1243; found, 501.1255.

## General Procedure for the synthesis of 5 and 6

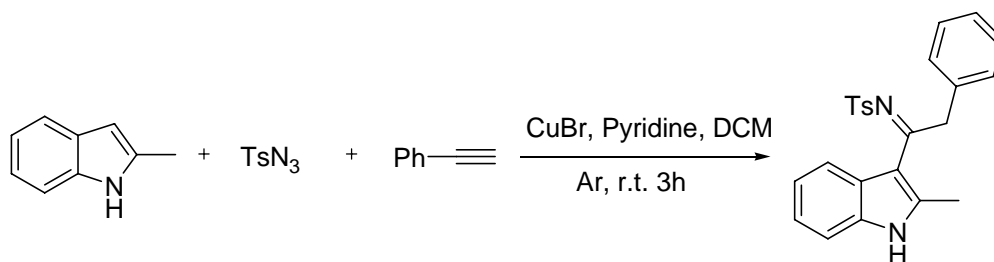

To a solution of 2-methyl indole (0.5 mmol), sulfonyl azide (1 mmol) and CuBr (0.05 mmol) in DCM (0.8 mL) in Schlenk tube was added the mixture of alkynes (1 mmol) and pyridine (1 mmol) in DCM (0.8 mL) slowly via syringe. The reaction mixture was stirred at room temperature for 3 h under argon. The solution was diluted by DCM (3 mL) and quenched by a mixture of 1N HCl and saturated NH<sub>4</sub>Cl under argon atmosphere. The aqueous layer was extracted by DCM and the combined organic layer was washed with saturated NH<sub>4</sub>Cl (10 mL), brine (10 mL) and dried over anhydrous sodium sulfate. The solvent was removed in vacuum, and the residue was purified by column chromatography on silica gel to give corresponding products. All the compounds were further recrystallized from EA.

## Characterization Data for 5 and 6

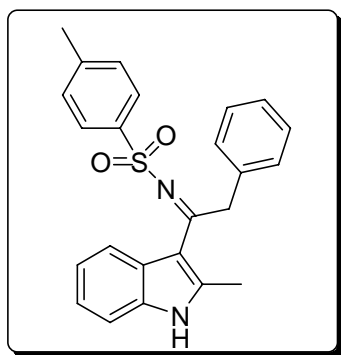

### 4-methyl-N-(1-(2-methyl-1H-indol-3-yl)-2-phenylethylidene)benzenesulfonamide (5a)

Pale yellow solid; mp. 208-209 °C; <sup>1</sup>H NMR (DMSO-*d*<sub>6</sub>) δ 12.21 (s, 1H), 7.90 (d, *J* = 8.0 Hz, 1H), 7.84 (d, *J* = 7.5 Hz, 2H), 7.40 (d, *J* = 8.0 Hz, 2H), 7.34 (d, *J* = 8.5 Hz,

1H), 7.25-7.20 (m, 4H), 7.16 (t,  $J = 7.5$  Hz, 1H), 7.12 (t,  $J = 7.5$  Hz, 1H), 7.04 (t,  $J = 7.5$  Hz, 1H), 4.84 (s, 2H), 2.50 (s, 3H), 2.39 (s, 3H) ppm;  $^{13}\text{C}$  NMR (DMSO- $d_6$ )  $\delta$  176.7, 147.9, 143.0, 140.5, 136.5, 135.7, 129.9, 128.9, 128.5, 127.0, 126.7, 126.6, 123.0, 122.5, 121.8, 112.3, 112.1, 40.9, 21.5, 16.5 ppm; IR (KBr)  $\nu$  3278, 3056, 2921, 1518, 1461, 1250, 1136, 1076, 1003, 778, 742, 543  $\text{cm}^{-1}$ ; MS (ESI)  $m/z$  403.2 ( $[\text{M}+\text{H}]^+$ ); HRMS (ESI) calcd for  $\text{C}_{24}\text{H}_{22}\text{N}_2\text{O}_2\text{S}$  ( $[\text{M}+\text{Na}]^+$ ), 425.1294; found, 425.1285.

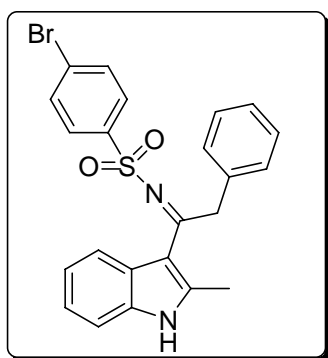

**4-bromo-*N*-(1-(2-methyl-1*H*-indol-3-yl)-2-phenylethylidene)benzenesulfonamide (5b)**

Pale yellow solid; mp. 198-199 °C;  $^1\text{H}$  NMR (DMSO- $d_6$ )  $\delta$  12.31 (s, 1H), 7.90 (m, 3H), 7.80 (d,  $J = 8.0$  Hz, 2H), 7.36 (d,  $J = 8.0$  Hz, 1H), 7.25 (t,  $J = 7.0$  Hz, 2H), 7.21-7.13 (m, 4H), 7.06 (t,  $J = 7.5$  Hz, 1H), 4.84 (s, 2H), 2.51 (s, 3H) ppm;  $^{13}\text{C}$  NMR (DMSO- $d_6$ )  $\delta$  177.2, 148.7, 142.6, 136.3, 135.8, 132.6, 128.9, 128.8, 128.5, 126.9, 126.7, 126.6, 123.2, 122.8, 121.8, 112.4, 112.2, 41.1, 16.6 ppm; IR (KBr)  $\nu$  3297, 3060, 3027, 1578, 1460, 1270, 1141, 1082, 1009, 790, 744, 539  $\text{cm}^{-1}$ ; MS (ESI)  $m/z$  466.9 ( $[\text{M}+\text{H}]^+$ ); HRMS (ESI) calcd for  $\text{C}_{23}\text{H}_{19}\text{BrN}_2\text{O}_2\text{S}$  ( $[\text{M}+\text{Na}]^+$ ), 489.0243; found, 489.0237.

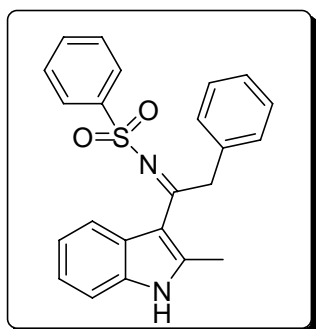

***N*-(1-(2-methyl-1*H*-indol-3-yl)-2-phenylethylidene)benzenesulfonamide (5c)**

Pale yellow solid; mp. 175-176 °C; <sup>1</sup>H NMR (DMSO-*d*<sub>6</sub>) δ 12.24 (s, 1H), 7.96 (d, *J* = 7.5 Hz, 2H), 7.88 (d, *J* = 8.0 Hz, 1H), 7.67-7.60 (m, 3H), 7.35 (d, *J* = 8.0 Hz, 1H), 7.27-7.22 (m, 4H), 7.17 (t, *J* = 7.0 Hz, 1H), 7.13 (t, *J* = 7.5 Hz, 1H), 7.03 (t, *J* = 8.0 Hz, 1H), 4.86 (s, 2H), 2.50 (s, 3H) ppm; <sup>13</sup>C NMR (DMSO-*d*<sub>6</sub>) δ 176.9, 148.2, 143.3, 136.5, 135.7, 132.8, 129.6, 128.9, 128.6, 127.0, 126.7, 126.6, 123.1, 122.6, 121.8, 112.4, 112.1, 41.1, 16.5 ppm; IR (KBr) ν 3318, 3059, 1526, 1486, 1459, 1282, 1257, 1141, 1081, 789, 750, 585, 529 cm<sup>-1</sup>; MS (ESI) *m/z* 389.0 ([*M*+*H*]<sup>+</sup>); HRMS (ESI) calcd for C<sub>23</sub>H<sub>20</sub>N<sub>2</sub>O<sub>2</sub>S ([*M*+*Na*]<sup>+</sup>), 411.1138; found, 411.1131.

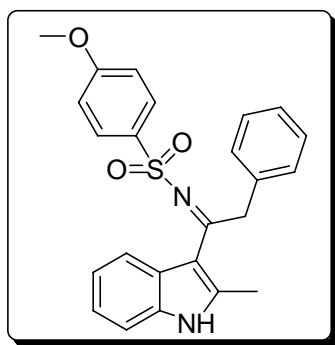

**4-methoxy-*N*-(1-(2-methyl-1*H*-indol-3-yl)-2-phenylethylidene)benzenesulfonamide (5d)**

Pale yellow solid; mp. 201-202 °C; <sup>1</sup>H NMR (DMSO-*d*<sub>6</sub>) δ 12.19 (s, 1H), 7.92-7.87 (m, 3H), 7.34 (d, *J* = 8.0 Hz, 1H), 7.25 (t, *J* = 7.5 Hz, 2H), 7.21-7.10 (m, 6H), 7.05 (t, *J* = 8.0 Hz, 1H), 4.83 (s, 2H), 3.84 (s, 3H), 2.50 (s, 3H) ppm; <sup>13</sup>C NMR (DMSO-*d*<sub>6</sub>) δ 176.4, 162.5, 137.7, 136.5, 135.7, 135.2, 128.9, 128.5, 127.0, 126.7, 123.0, 122.5, 121.9, 114.7, 112.3, 112.0, 56.1, 40.7, 16.4 ppm; IR (KBr) ν 3281, 3063, 2967, 1596, 1582, 1515, 1498, 1460, 1258, 1139, 1082, 809, 778, 548 cm<sup>-1</sup>; MS (ESI) *m/z* 419.0 ([*M*+*H*]<sup>+</sup>); HRMS (ESI) calcd for C<sub>24</sub>H<sub>22</sub>N<sub>2</sub>O<sub>3</sub>S ([*M*+*Na*]<sup>+</sup>), 441.1243; found, 441.1232.



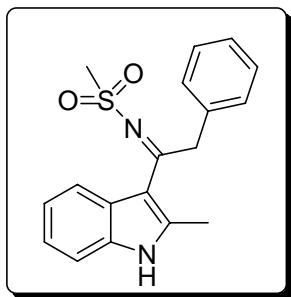

***N*-(1-(2-methyl-1*H*-indol-3-yl)-2-phenylethylidene)methanesulfonamide (5e)**

Pale yellow solid; mp. 205-206 °C; <sup>1</sup>H NMR (DMSO-*d*<sub>6</sub>) δ 12.14 (s, 1H), 8.09 (d, *J* = 8.0 Hz, 1H), 7.37-7.36 (m, 1H), 7.26-7.22 (m, 4H), 7.18-7.13 (m, 3H), 4.76 (s, 2H), 3.25 (s, 3H), 2.58 (s, 3H) ppm; <sup>13</sup>C NMR (DMSO-*d*<sub>6</sub>) δ 176.5, 147.2, 136.5, 135.7, 128.8, 128.7, 127.0, 126.7, 122.9, 122.4, 122.0, 112.0, 111.8, 43.9, 41.3, 16.5 ppm; IR (KBr) ν 3263, 3029, 2936, 1541, 1520, 1462, 1269, 1104, 810, 743, 501 cm<sup>-1</sup>; MS (ESI) *m/z* 327.1 ([*M*+*H*]<sup>+</sup>); HRMS (ESI) calcd for C<sub>18</sub>H<sub>18</sub>N<sub>2</sub>O<sub>2</sub>S ([*M*+*Na*]<sup>+</sup>), 349.0981; found, 349.0973.

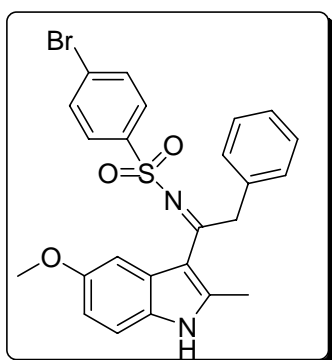

**4-bromo-*N*-(1-(5-methoxy-2-methyl-1*H*-indol-3-yl)-2-phenylethylidene)benzenesulfonamide (5f)**

Pale yellow solid; mp. 215-216 °C; <sup>1</sup>H NMR (DMSO-*d*<sub>6</sub>) δ 12.18 (s, 1H), 7.91 (d, *J* = 8.0 Hz, 2H), 7.82 (d, *J* = 8.0 Hz, 2H), 7.32-7.28 (m, 3H), 7.24-7.20 (m, 4H), 6.74 (d, *J* = 7.5 Hz, 1H), 4.82 (s, 2H), 3.42 (s, 3H), 2.47 (s, 3H) ppm; <sup>13</sup>C NMR (DMSO-*d*<sub>6</sub>) δ 176.5, 156.0, 148.6, 142.9, 136.3, 132.6, 130.3, 129.0, 128.8, 128.5, 127.9, 126.8, 126.5, 112.8, 112.4, 104.4, 55.1, 41.3, 16.5 ppm; IR (KBr) ν 3281, 3088, 2951, 1534, 1472, 1303, 1280, 1138, 1080, 827, 773, 539 cm<sup>-1</sup>; MS (ESI) *m/z* 495.2 ([*M*-*H*]); HRMS (ESI) calcd for C<sub>24</sub>H<sub>21</sub>BrN<sub>2</sub>O<sub>3</sub>S ([*M*+*Na*]<sup>+</sup>), 519.0348; found, 519.0340.

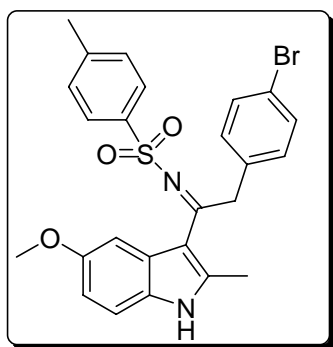

***N*-(2-(4-bromophenyl)-1-(5-methoxy-2-methyl-1*H*-indol-3-yl)ethylidene)-4-methylbenzenesulfonamide (5g)**

Pale yellow solid; mp. 204-205 °C;  $^1\text{H}$  NMR (DMSO- $d_6$ )  $\delta$  12.14 (s, 1H), 7.86 (d,  $J$  = 8.0 Hz, 2H), 7.49 (d,  $J$  = 8.0 Hz, 2H), 7.40 (d,  $J$  = 8.0 Hz, 2H), 7.36 (d,  $J$  = 1.5 Hz, 1H), 7.23 (d,  $J$  = 8.5 Hz, 1H), 7.18 (d,  $J$  = 8.0 Hz, 2H), 6.74 (dd,  $J_1$  = 9.0 Hz,  $J_2$  = 2.5 Hz, 1H), 4.77 (s, 2H), 3.41 (s, 3H), 2.47 (s, 3H), 2.39 (s, 3H) ppm;  $^{13}\text{C}$  NMR (DMSO- $d_6$ )  $\delta$  175.3, 156.0, 148.1, 143.0, 140.7, 136.0, 131.8, 130.7, 130.3, 129.9, 127.9, 126.7, 119.9, 112.7, 112.7, 112.1, 104.4, 55.1, 40.5, 21.4, 16.5 ppm; IR (KBr)  $\nu$  3290, 2957, 1592, 1513, 1473, 1279, 1142, 1075, 828, 768, 542  $\text{cm}^{-1}$ ; MS (ESI)  $m/z$  509.3 ( $[\text{M}-\text{H}]^-$ ); HRMS (ESI) calcd for  $\text{C}_{25}\text{H}_{23}\text{BrN}_2\text{O}_3\text{S}$  ( $[\text{M}+\text{Na}]^+$ ), 533.0505; found, 533.0489.

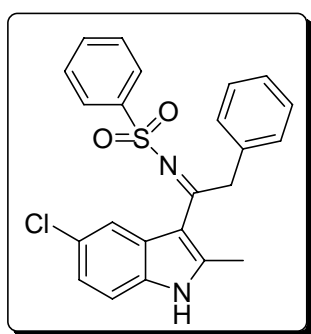

***N*-(1-(5-chloro-2-methyl-1*H*-indol-3-yl)-2-phenylethylidene)benzenesulfonamide (5h)**

Pale yellow solid; mp. 177-178 °C;  $^1\text{H}$  NMR (DMSO- $d_6$ )  $\delta$  12.36 (s, 1H), 7.99 (d,  $J$  = 7.0 Hz, 2H), 7.89 (d,  $J$  = 2.0 Hz, 1H), 7.71-7.63 (m, 3H), 7.34 (d,  $J$  = 9.0 Hz, 1H), 7.29 (t,  $J$  = 7.5 Hz, 2H), 7.23-7.18 (m, 3H), 7.15 (dd,  $J_1$  = 8.5 Hz,  $J_2$  = 2.0 Hz, 1H),

4.83 (s, 2H), 2.48 (s, 3H) ppm;  $^{13}\text{C}$  NMR (DMSO- $d_6$ )  $\delta$  176.5, 149.2, 143.1, 136.2, 134.2, 133.0, 129.6, 129.0, 128.5, 128.3, 127.3, 126.8, 126.6, 123.1, 121.6, 113.5, 111.9, 41.1, 16.2 ppm; IR (KBr)  $\nu$  3309, 3063, 3027, 1578, 1521, 1458, 1356, 1284, 1143, 1082, 793, 751, 727, 589, 533  $\text{cm}^{-1}$ ; MS (ESI)  $m/z$  422.7 ( $[\text{M}+\text{H}]^+$ ); HRMS (ESI) calcd for  $\text{C}_{23}\text{H}_{19}\text{ClN}_2\text{O}_2\text{S}$  ( $[\text{M}+\text{Na}]^+$ ), 445.0748; found, 445.0746.

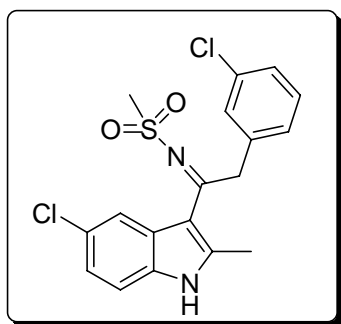

***N*-(1-(5-chloro-2-methyl-1*H*-indol-3-yl)-2-(3-chlorophenyl)ethylidene)methanesulfonamide (5i)**

Pale yellow solid; mp. 188-189 °C;  $^1\text{H}$  NMR (DMSO- $d_6$ )  $\delta$  12.36 (s, 1H), 8.08 (s, 1H), 7.38 (d,  $J = 8.5$  Hz, 1H), 7.32-7.24 (m, 3H), 7.20-7.16 (m, 2H), 4.75 (s, 2H), 3.28 (s, 3H), 2.57 (s, 3H) ppm;  $^{13}\text{C}$  NMR (DMSO- $d_6$ )  $\delta$  175.5, 148.6, 138.8, 134.2, 133.5, 130.8, 128.4, 128.1, 127.3, 127.2, 126.9, 123.0, 121.3, 113.6, 111.2, 43.8, 40.7, 16.5 ppm; IR (KBr)  $\nu$  3246, 1531, 1476, 1462, 1440, 1271, 1115, 1004, 959, 815, 497  $\text{cm}^{-1}$ ; MS (ESI)  $m/z$  417.6 ( $[\text{M}+\text{Na}]^+$ ); HRMS (ESI) calcd for  $\text{C}_{18}\text{H}_{16}\text{Cl}_2\text{N}_2\text{O}_2\text{S}$  ( $[\text{M}+\text{Na}]^+$ ), 417.0202; found, 417.0209.

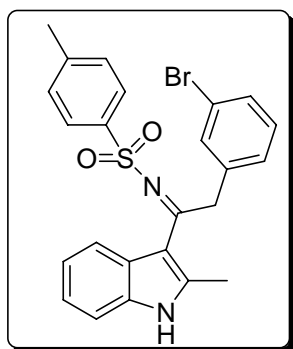

***N*-(2-(3-bromophenyl)-1-(2-methyl-1*H*-indol-3-yl)ethylidene)-4-methylbenzenesulfonamide**

### fonamide (5j)

Pale yellow solid; mp. 204-205 °C;  $^1\text{H}$  NMR (DMSO- $d_6$ )  $\delta$  12.31 (s, 1H), 7.90 (d,  $J$  = 8.0 Hz, 1H), 7.82 (d,  $J$  = 8.0 Hz, 2H), 7.39-7.35 (m, 5H), 7.24-7.21 (m, 2H), 7.15 (t,  $J$  = 8.0 Hz, 1H), 7.07 (t,  $J$  = 7.5 Hz, 1H), 4.84 (s, 2H), 2.52 (s, 3H), 2.38 (s, 3H) ppm;  $^{13}\text{C}$  NMR (DMSO- $d_6$ )  $\delta$  175.8, 148.4, 143.2, 140.3, 139.2, 135.8, 131.1, 131.1, 130.0, 129.7, 127.6, 126.9, 126.8, 123.2, 122.8, 122.2, 121.8, 112.2, 112.2, 21.5, 16.6 ppm; IR (KBr)  $\nu$  3293, 3060, 2978, 2920, 1584, 1516, 1459, 1257, 1138, 1077, 1004, 778, 742, 544  $\text{cm}^{-1}$ ; MS (ESI)  $m/z$  481.2 ( $[\text{M}+\text{H}]^+$ ); HRMS (ESI) calcd for  $\text{C}_{24}\text{H}_{21}\text{BrN}_2\text{O}_2\text{S}$  ( $[\text{M}+\text{Na}]^+$ ), 503.0399; found, 503.0398.

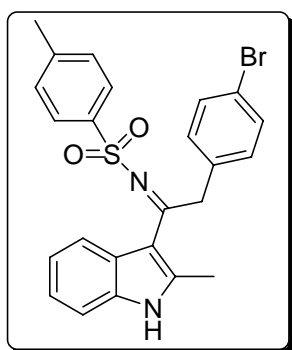

### *N*-(2-(4-bromophenyl)-1-(2-methyl-1*H*-indol-3-yl)ethylidene)-4-methylbenzenesulfonamide (5k)

Pale yellow solid; mp. 211-212 °C;  $^1\text{H}$  NMR (DMSO- $d_6$ )  $\delta$  12.27 (s, 1H), 7.86 (d,  $J$  = 8.0 Hz, 1H), 7.82 (d,  $J$  = 8.0 Hz, 2H), 7.45 (d,  $J$  = 8.5 Hz, 2H), 7.40 (d,  $J$  = 8.0 Hz, 2H), 7.35 (d,  $J$  = 7.5 Hz, 1H), 7.15-7.12 (m, 3H), 7.05 (t,  $J$  = 7.5 Hz, 1H), 4.79 (s, 2H), 2.50 (s, 3H), 2.40 (s, 3H) ppm;  $^{13}\text{C}$  NMR (DMSO- $d_6$ )  $\delta$  176.1, 148.2, 143.1, 140.4, 135.9, 135.7, 131.8, 130.7, 129.9, 126.9, 126.7, 123.1, 122.6, 121.8, 119.9, 112.2, 21.5, 16.5 ppm; IR (KBr)  $\nu$  3360, 3264, 3065, 2920, 1518, 1460, 1305, 1261, 1157, 1138, 1077, 1007, 814, 777, 540  $\text{cm}^{-1}$ ; MS (ESI)  $m/z$  481.2 ( $[\text{M}+\text{H}]^+$ ); HRMS (ESI) calcd for  $\text{C}_{24}\text{H}_{21}\text{BrN}_2\text{O}_2\text{S}$  ( $[\text{M}+\text{Na}]^+$ ), 503.0399; found, 503.0398.

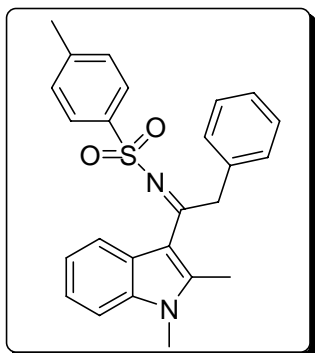

***N*-(1-(1,2-dimethyl-1*H*-indol-3-yl)-2-phenylethylidene)-4-methylbenzenesulfonamide (5l)**

Orange solid; mp. 171-172 °C; <sup>1</sup>H NMR (DMSO-*d*<sub>6</sub>) δ 7.89 (d, *J* = 8.0 Hz, 1H), 7.84 (d, *J* = 8.5 Hz, 2H), 7.49 (d, *J* = 8.0 Hz, 1H), 7.40 (d, *J* = 8.0 Hz, 2H), 7.23-7.07 (m, 7H), 4.90 (s, 2H), 3.67 (s, 3H), 2.53 (s, 3H), 2.39 (s, 3H) ppm; <sup>13</sup>C NMR (DMSO-*d*<sub>6</sub>) δ 176.9, 148.1, 143.1, 140.4, 137.4, 136.6, 130.0, 128.9, 128.6, 126.7, 126.0, 122.9, 122.8, 121.4, 112.2, 111.1, 41.4, 30.5, 21.4, 14.0 ppm; IR (KBr) ν 3449, 3030, 2924, 1513, 1470, 1410, 1379, 1144, 1085, 738, 542 cm<sup>-1</sup>; MS (ESI) *m/z* 417.7 ([*M*+*H*]<sup>+</sup>); HRMS (ESI) calcd for C<sub>25</sub>H<sub>24</sub>N<sub>2</sub>O<sub>2</sub>S ([*M*+*Na*]<sup>+</sup>), 439.1451; found, 439.1442.

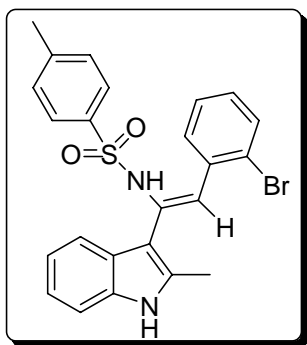

***(Z)*-*N*-(2-(2-bromophenyl)-1-(2-methyl-1*H*-indol-3-yl)vinyl)-4-methylbenzenesulfonamide (6a)**

Pale yellow solid; mp. 173-174 °C; <sup>1</sup>H NMR (DMSO-*d*<sub>6</sub>) δ 11.00 (s, 1H), 9.68 (s, 1H), 7.68 (d, *J* = 8.0 Hz, 2H), 7.47 (d, *J* = 8.0 Hz, 1H), 7.40 (d, *J* = 8.0 Hz, 2H), 7.20 (d, *J* = 8.0 Hz, 1H), 7.02 (d, *J* = 7.5 Hz, 1H), 6.96 (t, *J* = 7.5 Hz, 1H), 6.88-6.82 (m, 2H), 6.78 (t, *J* = 8.0 Hz, 1H), 6.53-6.52 (m, 1H), 6.32 (s, 1H), 2.39 (s, 3H), 1.78 (s, 3H) ppm; <sup>13</sup>C NMR (DMSO-*d*<sub>6</sub>) δ 143.4, 137.9, 137.8, 136.0, 135.6, 133.0, 132.6, 129.9, 129.7, 127.8, 127.7, 127.4, 127.2, 123.7, 120.9, 119.4, 118.9, 115.8, 111.0, 106.6, 21.5,

12.3 ppm; IR (KBr)  $\nu$  3334, 3215, 3057, 2919, 2851, 1628, 1459, 1418, 1291, 1157, 1061, 745, 706, 699, 549  $\text{cm}^{-1}$ ; MS (ESI)  $m/z$  481.4 ( $[\text{M}+\text{H}]^+$ ); HRMS (ESI) calcd for  $\text{C}_{24}\text{H}_{21}\text{BrN}_2\text{O}_2\text{S}$  ( $[\text{M}+\text{Na}]^+$ ), 503.0399; found, 503.0398.

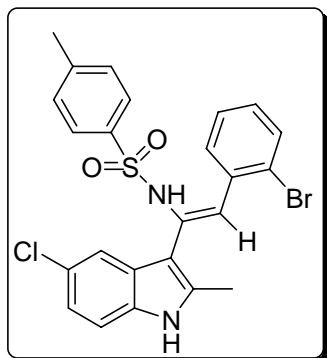

**(Z)-N-(2-(2-bromophenyl)-1-(5-chloro-2-methyl-1H-indol-3-yl)vinyl)-4-methylbenzenesulfonamide (6b)**

Pale yellow solid; mp. 208-209 °C;  $^1\text{H}$  NMR ( $\text{DMSO}-d_6$ )  $\delta$  11.19 (s, 1H), 9.74 (s, 1H), 7.62 (d,  $J = 8.0$  Hz, 2H), 7.50 (d,  $J = 7.5$  Hz, 1H), 7.37 (d,  $J = 8.0$  Hz, 2H), 7.19 (d,  $J = 8.5$  Hz, 1H), 6.95-6.89 (m, 2H), 6.82 (t,  $J = 7.5$  Hz, 1H), 6.77 (m, 1H), 6.51 (t,  $J = 7.5$  Hz, 1H), 6.42 (s, 1H), 2.39 (s, 3H), 1.79 (s, 3H) ppm;  $^{13}\text{C}$  NMR ( $\text{DMSO}-d_6$ )  $\delta$  143.6, 138.0, 137.6, 137.5, 134.0, 132.6, 132.3, 130.0, 129.7, 129.0, 128.1, 127.4, 127.3, 124.1, 123.7, 120.8, 117.9, 116.7, 112.4, 106.4, 21.5, 12.3 ppm; IR (KBr)  $\nu$  3314, 3220, 2920, 1630, 1467, 1441, 1301, 1155, 1072, 803, 753, 708, 684  $\text{cm}^{-1}$ ; MS (ESI)  $m/z$  515.1 ( $[\text{M}+\text{H}]^+$ ); HRMS (ESI) calcd for  $\text{C}_{24}\text{H}_{20}\text{BrClN}_2\text{O}_2\text{S}$  ( $[\text{M}+\text{Na}]^+$ ), 537.0010; found, 537.0018.

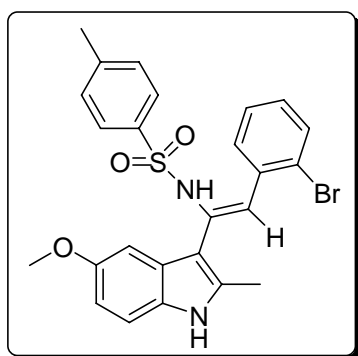

**(Z)-N-(2-(2-bromophenyl)-1-(5-methoxy-2-methyl-1H-indol-3-yl)vinyl)-4-methylbenzenesulfonamide (6c)**

Pale yellow solid; mp. 155-156 °C;  $^1\text{H}$  NMR (DMSO- $d_6$ )  $\delta$  10.88 (s, 1H), 9.65 (s, 1H), 7.63 (d,  $J$  = 8.0 Hz, 2H), 7.48-7.46 (m, 1H), 7.37 (d,  $J$  = 8.0 Hz, 2H), 7.05 (d,  $J$  = 8.5 Hz, 1H), 6.88-6.85 (m, 1H), 6.79 (t,  $J$  = 7.5 Hz, 1H), 6.59-6.57 (m, 1H), 6.55-6.53 (m, 1H), 6.33 (t,  $J$  = 2.5 Hz, 1H), 6.29 (s, 1H), 3.54 (s, 3H), 2.38 (s, 3H), 1.93 (s, 3H) ppm;  $^{13}\text{C}$  NMR (DMSO- $d_6$ )  $\delta$  153.7, 143.4, 138.0, 137.6, 137.0, 133.1, 132.5, 130.4, 129.9, 128.0, 127.8, 127.4, 127.2, 123.6, 115.3, 111.5, 110.6, 106.4, 100.8, 55.3, 21.4, 12.6 ppm; IR (KBr)  $\nu$  3394, 3328, 3228, 2924, 1625, 1484, 1451, 1163, 1063, 806, 675, 550  $\text{cm}^{-1}$ ; MS (ESI)  $m/z$  511.0 ( $[\text{M}+\text{H}]^+$ ); HRMS (ESI) calcd for  $\text{C}_{25}\text{H}_{23}\text{BrN}_2\text{O}_3\text{S}$  ( $[\text{M}+\text{Na}]^+$ ), 533.0505; found, 533.0508.

### General Procedure for the synthesis of 7.

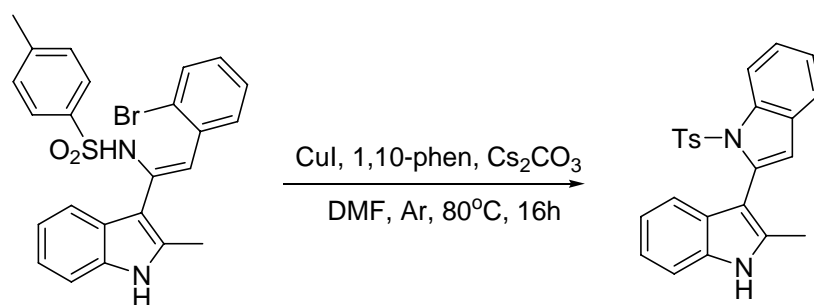

To a mixture of **6a** (0.3 mmol), CuI (0.03 mmol, 0.1 equiv), 1,10-phenanthroline (0.06 mmol, 0.2 equiv), and  $\text{Cs}_2\text{CO}_3$  (0.6 mmol, 2.0 equiv) was added DMF (4 mL). The reaction mixture was heated at 80 °C for 16 h under argon. The reaction was diluted with EA and washed with  $\text{H}_2\text{O}$  and saturated NaCl solution. The organic layer was dried over  $\text{MgSO}_4$ , and concentrated in vacuo. The residue was purified by column chromatography on silica gel.

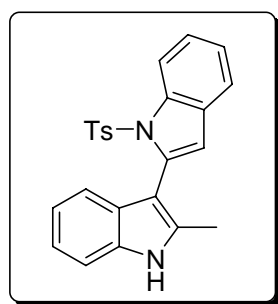

**2'-methyl-1-tosyl-2,3'-bi(1H-indole) (7a)**

Pale yellow solid; mp. 91-92°C.  $^1\text{H}$  NMR ( $\text{CDCl}_3$ )  $\delta$  8.38 (d,  $J=8.5$  Hz, 1H), 8.15 (s, 1H), 7.47 (d,  $J=7.5$  Hz, 1H), 7.35 (t,  $J=7.5$ , 1H), 7.31-7.26 (m, 2H), 7.17 (d,  $J=8.5$  Hz, 2H), 7.14-7.11 (m, 2H), 6.99 (t,  $J=7.5$ , 1H), 6.86 (d,  $J=8.0$  Hz, 2H), 6.57 (s, 1H), 2.39 (s, 3H), 2.22 (s, 3H) ppm;  $^{13}\text{C}$  NMR ( $\text{CDCl}_3$ )  $\delta$  144.2, 138.0, 136.7, 134.9, 134.7, 130.8, 129.3, 129.1, 126.8, 124.1, 123.8, 121.3, 120.2, 120.0, 118.7, 116.3, 113.3, 110.3, 104.8, 21.4, 13.1 ppm; IR (KBr)  $\nu$  3402, 3056, 2922, 2854, 1598, 1456, 1367, 1172, 1090, 1055, 747, 675, 578  $\text{cm}^{-1}$ ; MS (ESI)  $m/z$  401.3 ( $[\text{M}+\text{H}]^+$ ); HRMS (ESI) calcd for  $\text{C}_{24}\text{H}_{20}\text{N}_2\text{O}_2\text{S}$  ( $[\text{M}+\text{Na}]^+$ ), 423.1138; found, 423.1134.

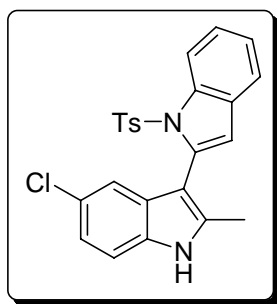

**5'-chloro-2'-methyl-1-tosyl-2,3'-bi(1'*H*-indole) (7b)**

Pale yellow solid; mp. 205-206°C.  $^1\text{H}$  NMR ( $\text{CDCl}_3$ )  $\delta$  8.40 (dd,  $J_2=0.5$  Hz,  $J_2=8.5$  Hz, 1H), 8.23 (s, 1H), 7.51 (d,  $J=7.5$  Hz, 1H), 7.35 (m, 1H), 7.32-7.31 (m, 1H), 7.19 (d,  $J=8.5$  Hz, 1H), 7.07 (d,  $J=8.0$  Hz, 2H), 7.05-7.03 (m, 1H), 6.86 (d,  $J=7.5$ , 2H), 6.73 (d,  $J=2.0$  Hz, 1H), 6.57 (s, 1H), 2.42 (s, 3H), 2.26 (s, 3H) ppm;  $^{13}\text{C}$  NMR ( $\text{CDCl}_3$ )  $\delta$  144.6, 138.6, 138.1, 135.0, 133.6, 132.9, 130.4, 130.3, 129.1, 126.7, 125.8, 124.4, 123.9, 121.4, 120.4, 117.9, 116.2, 113.5, 111.2, 104.3, 21.5, 13.2 ppm; IR (KBr)  $\nu$  3404, 3057, 2922, 1597, 1467, 1452, 1364, 1224, 1173, 812, 733  $\text{cm}^{-1}$ ; MS (ESI)  $m/z$  435.0 ( $[\text{M}+\text{H}]^+$ ); HRMS (ESI) calcd for  $\text{C}_{24}\text{H}_{19}\text{ClN}_2\text{O}_2\text{S}$  ( $[\text{M}+\text{Na}]^+$ ), 457.0748; found, 457.0759.



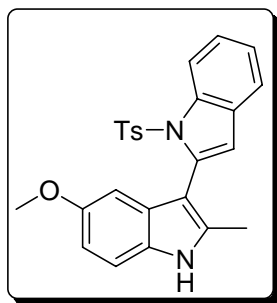

### 5'-methoxy-2'-methyl-1-tosyl-2,3'-bi(1'*H*-indole) (**7c**)

Yellow oil;  $^1\text{H}$  NMR ( $\text{CDCl}_3$ )  $\delta$  8.40 (d,  $J=8.05$  Hz, 1H), 8.08 (s, 1H), 7.51 (d,  $J=7.5$  Hz, 1H), 7.38-7.35 (m, 1H), 7.31-7.29 (m, 1H), 7.19-7.15 (m, 3H), 6.86 (d,  $J=8.0$  Hz, 2H), 6.77-6.75 (m, 1H), 6.57 (s, 1H), 6.04 (d,  $J=2.0$  Hz, 1H), 3.65 (s, 3H), 2.37 (s, 3H), 2.27 (s, 3H) ppm;  $^{13}\text{C}$  NMR ( $\text{CDCl}_3$ )  $\delta$  154.4, 144.2, 138.0, 137.6, 135.2, 134.7, 130.6, 129.9, 129.5, 129.0, 126.9, 124.2, 123.7, 120.2, 116.2, 113.0, 111.2, 111.0, 104.5, 100.3, 55.5, 21.3, 13.1 ppm; IR (KBr)  $\nu$  3409, 1633, 1485, 1453, 1254, 1175, 909, 812, 799, 676  $\text{cm}^{-1}$ ; MS (ESI)  $m/z$  431.1 ( $[\text{M}+\text{H}]^+$ ); HRMS (ESI) calcd for  $\text{C}_{25}\text{H}_{22}\text{N}_2\text{O}_3\text{S}$  ( $[\text{M}+\text{Na}]^+$ ), 453.1243; found, 453.1252.

### General procedure for the synthesis of **8**

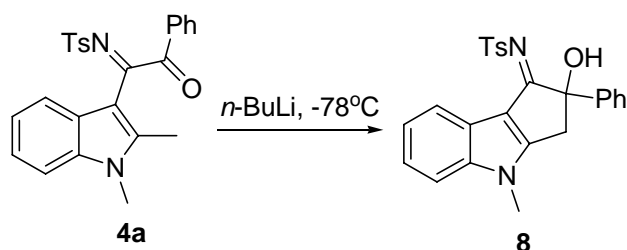

To a solution of **4a** (0.25 mmol) in dry THF was slowly added *n*-BuLi in hexane (120  $\mu\text{L}$ , 0.3 mmol) at  $-78^\circ\text{C}$  under Ar. And the reaction mixture was stirred at this temperature for 2h, then warmed to room temperature for 1h. The solution was diluted with DCM (3 mL) and quenched by saturated  $\text{NH}_4\text{Cl}$  under argon atmosphere. The aqueous layer was extracted by DCM and the combined organic layer was washed with saturated  $\text{NH}_4\text{Cl}$  (10 mL), brine (10 mL) and dried over anhydrous sodium sulfate. The solvent was removed in vacuum, and the residue was purified by column chromatography on silica gel and further recrystallized from EA.

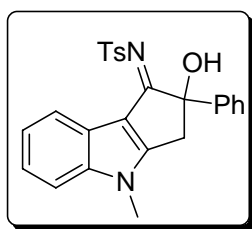

***N*-(2-hydroxy-4-methyl-2-phenyl-2,3-dihydrocyclopenta[*b*]indol-1(4*H*)-ylidene)-4-methylbenzenesulfonamide (8)**

Yellow solid; mp. 219-220 °C;  $^1\text{H}$  NMR (DMSO- $d_6$ )  $\delta$  8.49 (d,  $J = 7.5$  Hz, 1H), 7.71 (d,  $J = 8.5$  Hz, 2H), 7.65 (d,  $J = 8.5$ , 1H), 7.42-7.24 (m, 9H), 6.47 (s, 1H), 3.85 (s, 3H), 3.64 (d,  $J = 18.5$ , 1H), 3.48 (d,  $J = 18.0$  Hz, 1H), 2.36 (s, 3H) ppm;  $^{13}\text{C}$  NMR (DMSO- $d_6$ )  $\delta$  177.2, 166.9, 145.4, 144.2, 142.5, 140.9, 129.6, 128.4, 127.6, 126.5, 125.5, 124.4, 123.3, 122.9, 113.7, 111.7, 88.3, 40.8, 31.9, 21.4 ppm; IR (KBr)  $\nu$  3543, 3453, 3058, 2950, 1597, 1526, 1451, 1412, 1282, 1147, 1084, 856, 824, 754, 576  $\text{cm}^{-1}$ ; MS (ESI)  $m/z$  431.4 ( $[\text{M}+\text{H}]^+$ ); HRMS (ESI) calcd for  $\text{C}_{25}\text{H}_{22}\text{N}_2\text{O}_3\text{S}$  ( $[\text{M}+\text{Na}]^+$ ), 453.1243; found, 453.1232.

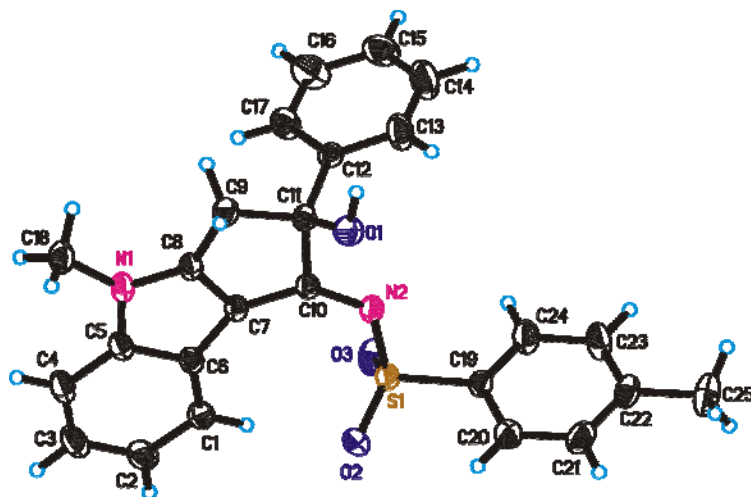

**References and Notes**

1. (a) Danheiser, R. L.; Miller, R. F.; Brisbois, R. G.; Park, S. Z. *J. Org. Chem.*; **1990**; 55, 1959-1964. (b) Hazen, G. G.; Bollinger, F. W.; Roberts, F. E.; Russ, W. K.; Seman, J. J.; Staskiewicz, S. *Org. Synth.* **1998**, *Coll. Vol. 9*, 400; **1996**, *Vol. 73*, 144.

2. Caution: Although the mixture of sulfonyl azides is the safest of a group of diazo compounds, one should keep in mind the inherent instability, shock sensitivity, and explosive power of azides. All users should exercise appropriate caution.

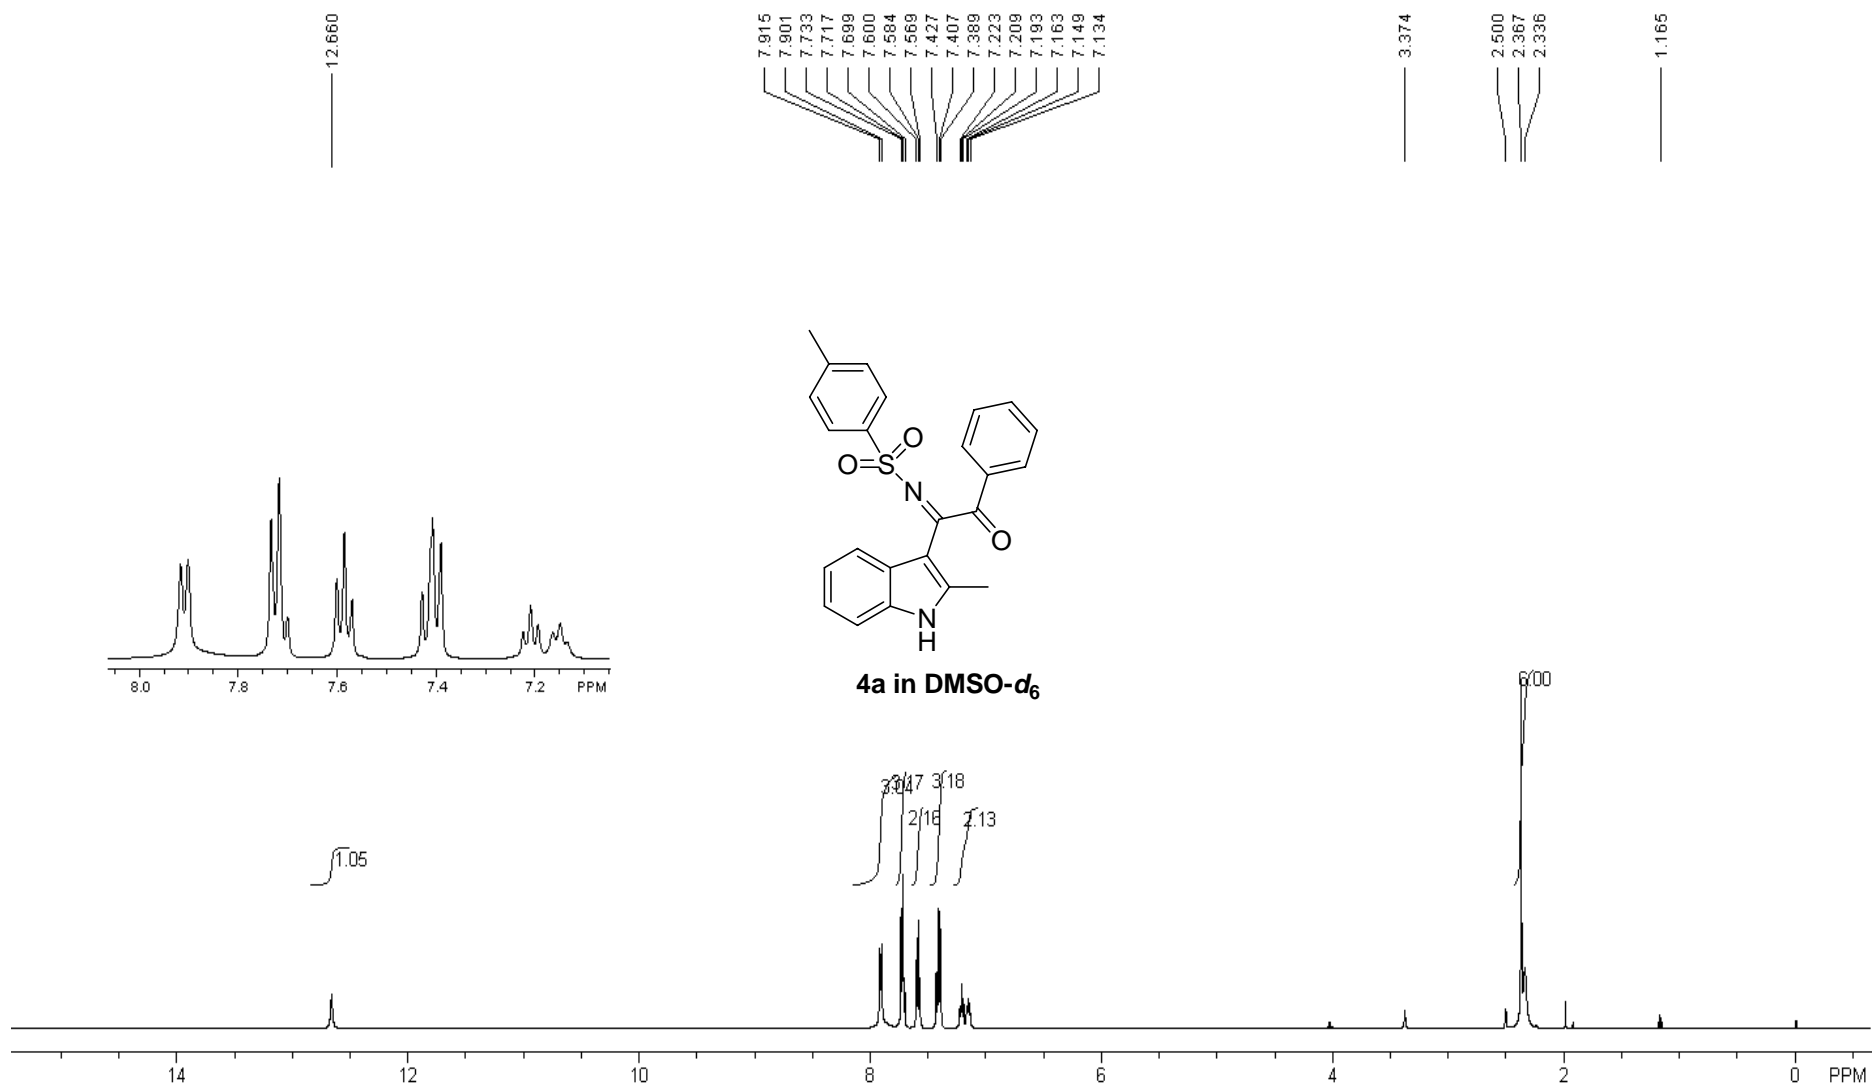

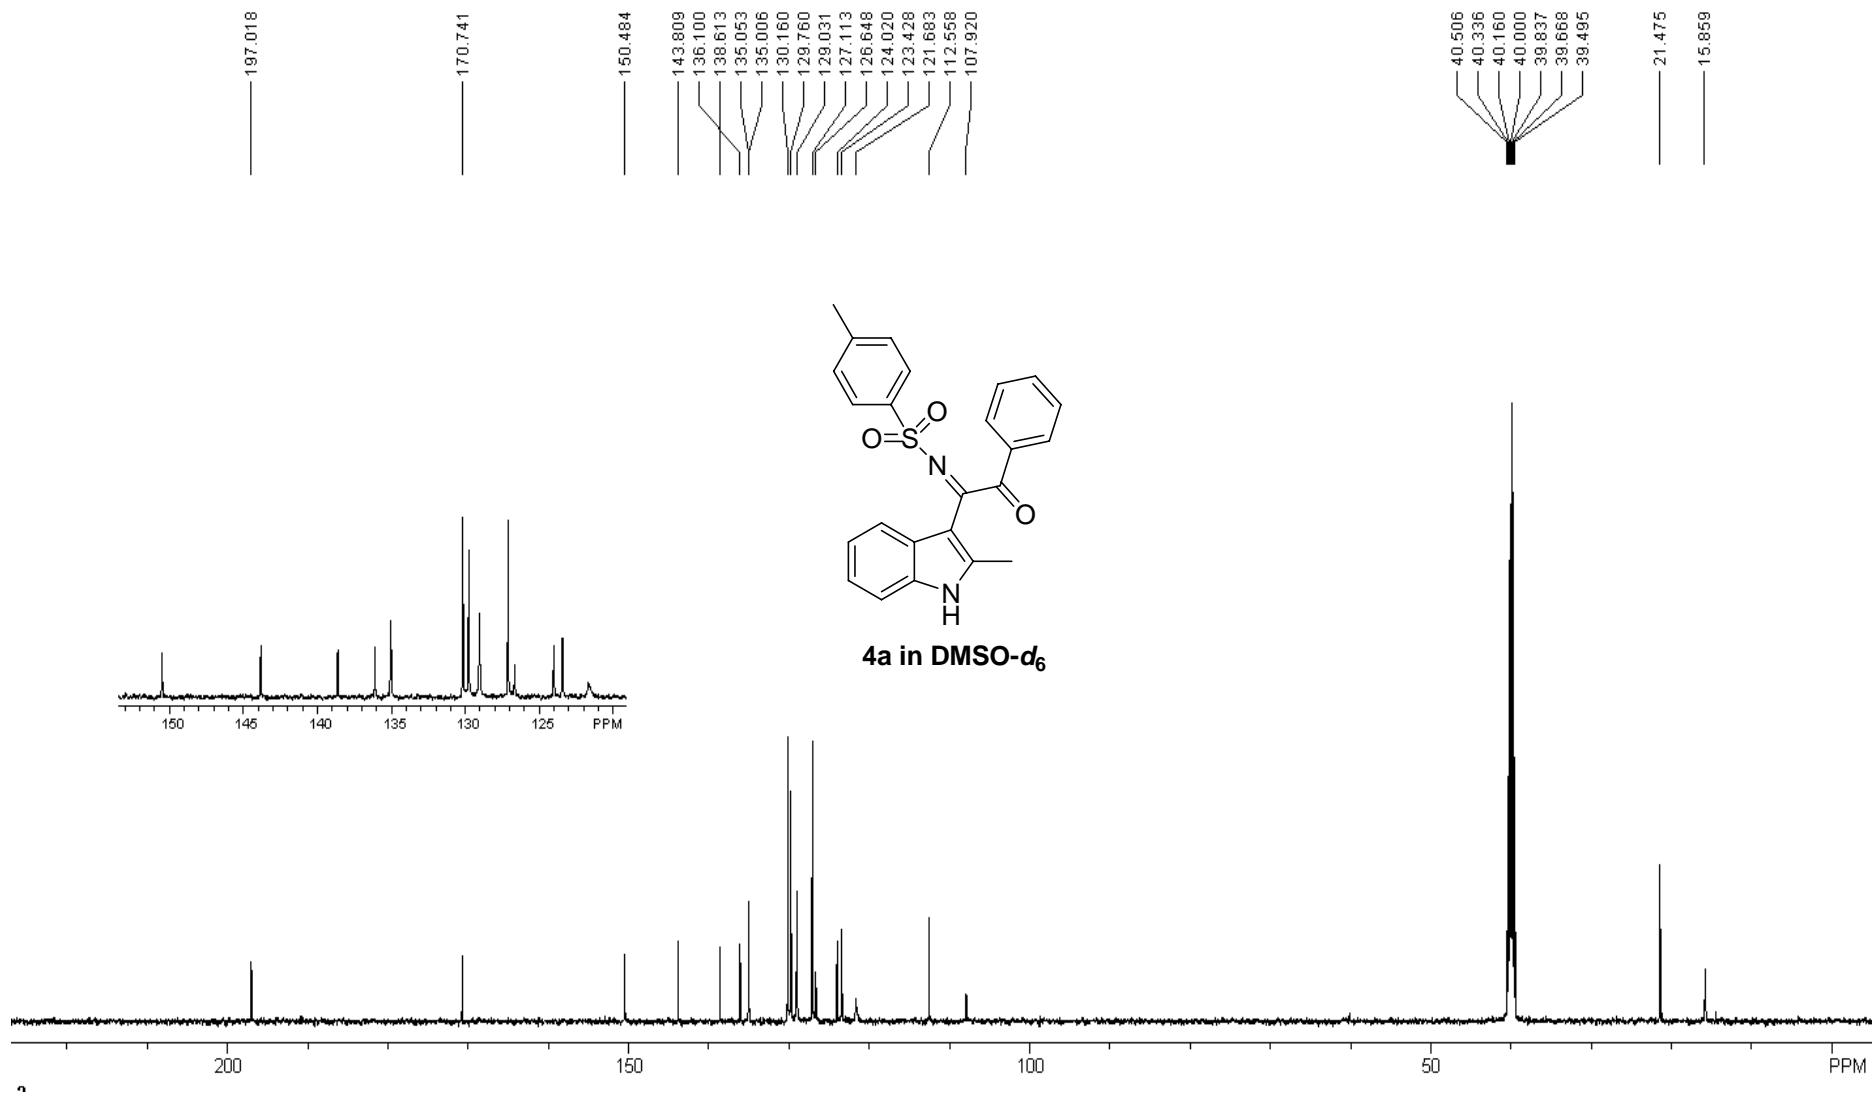

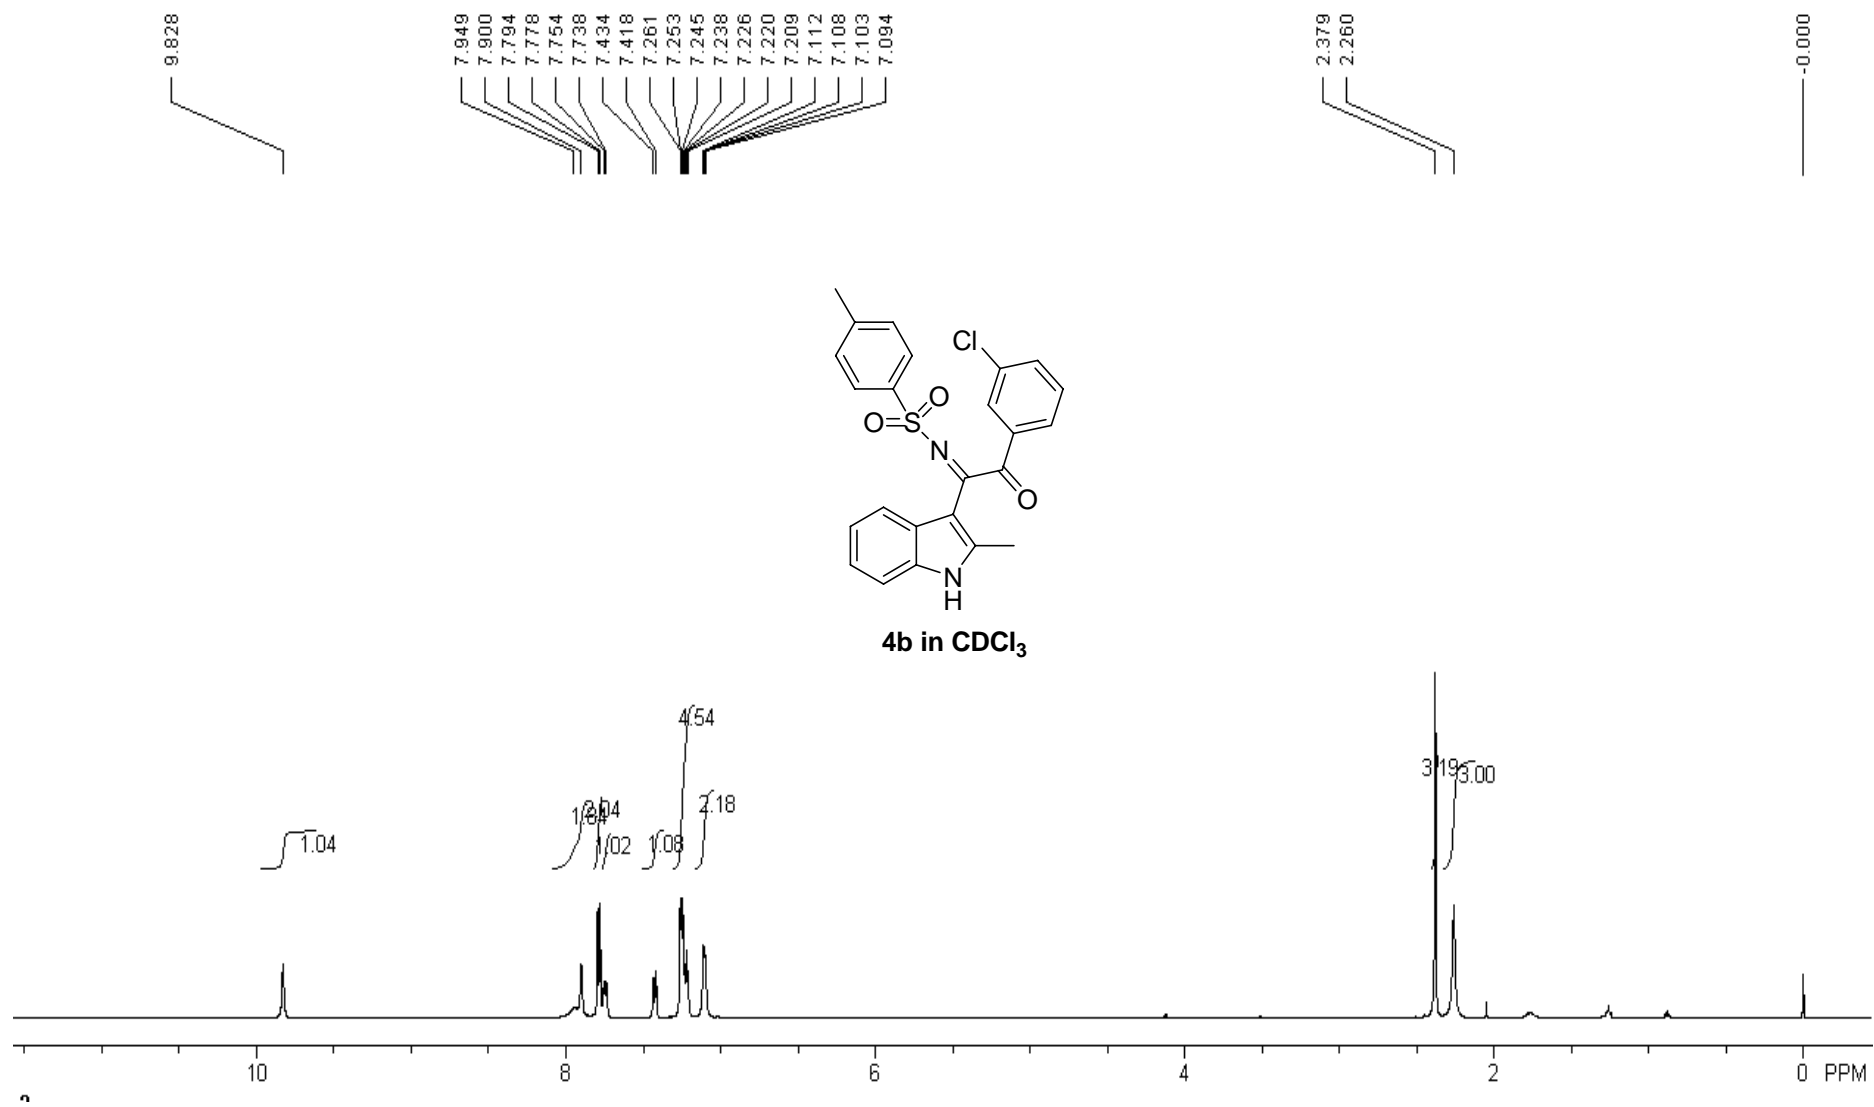

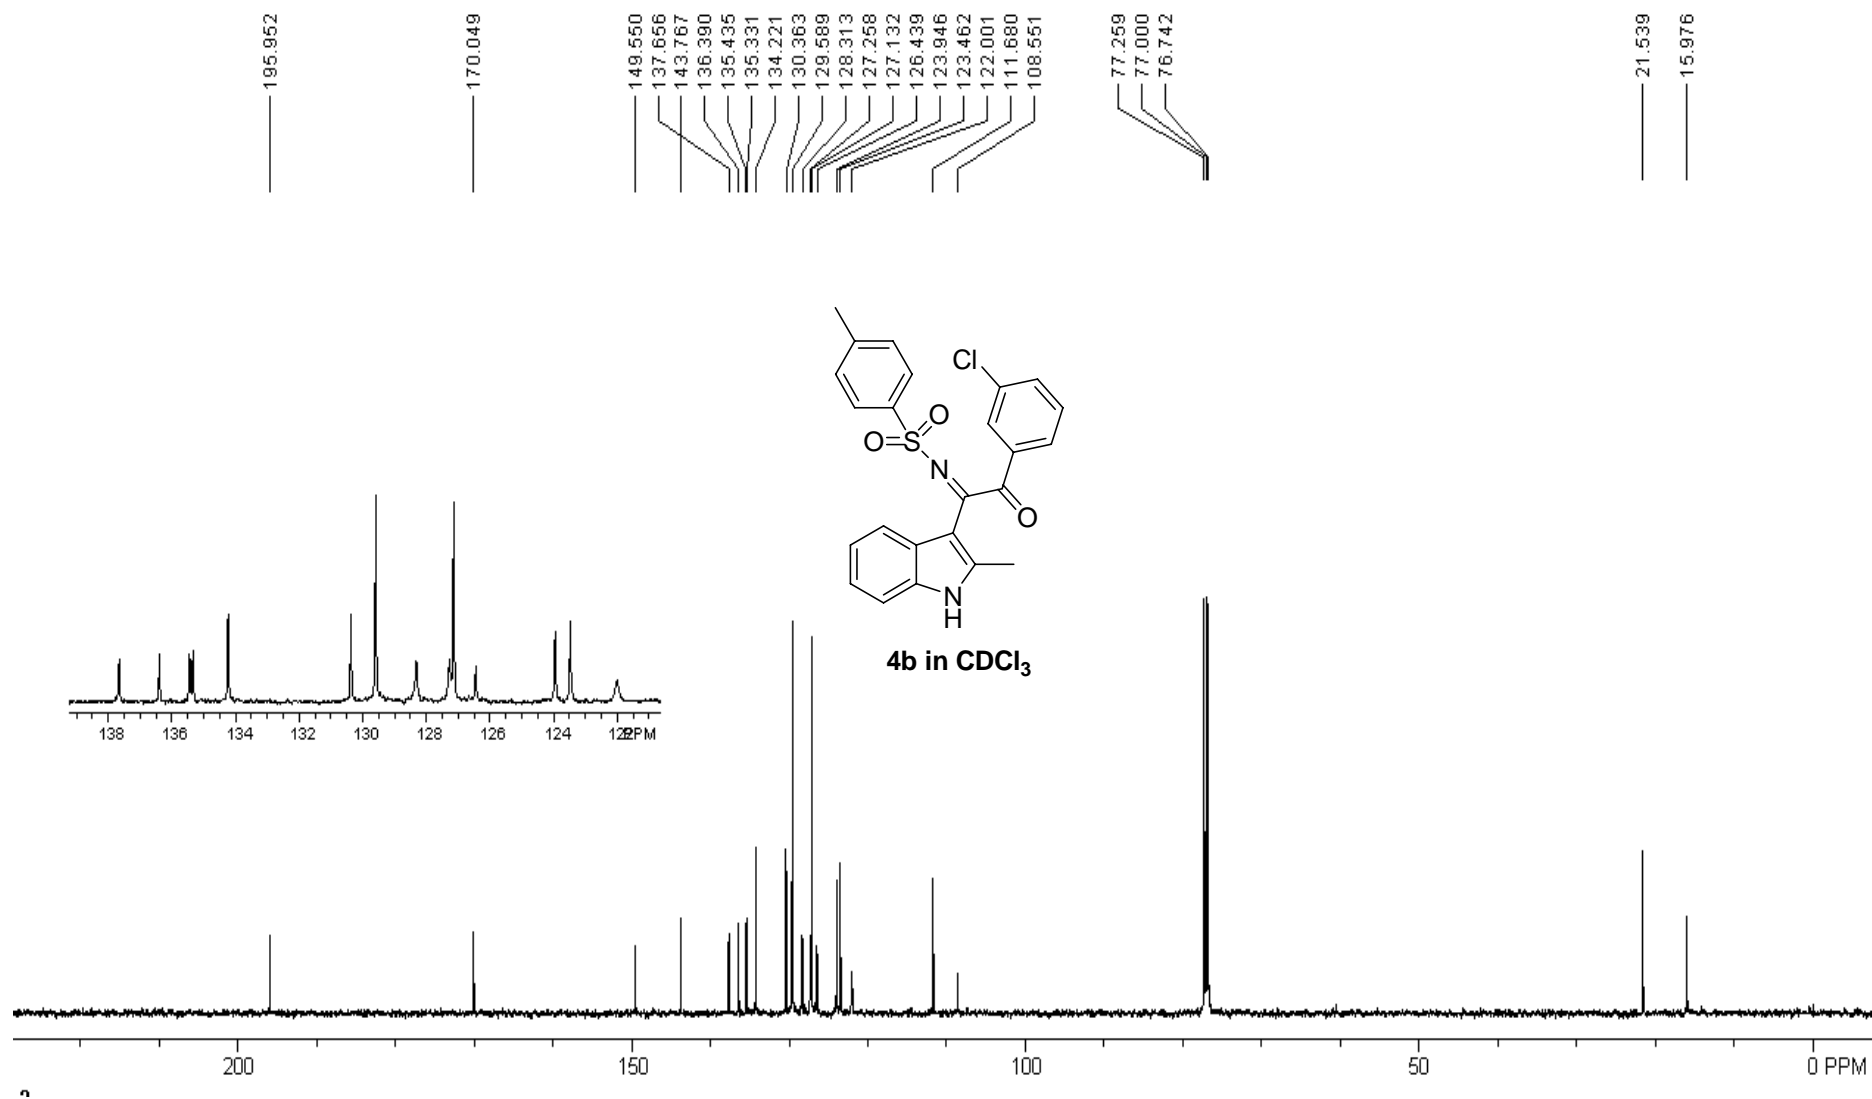

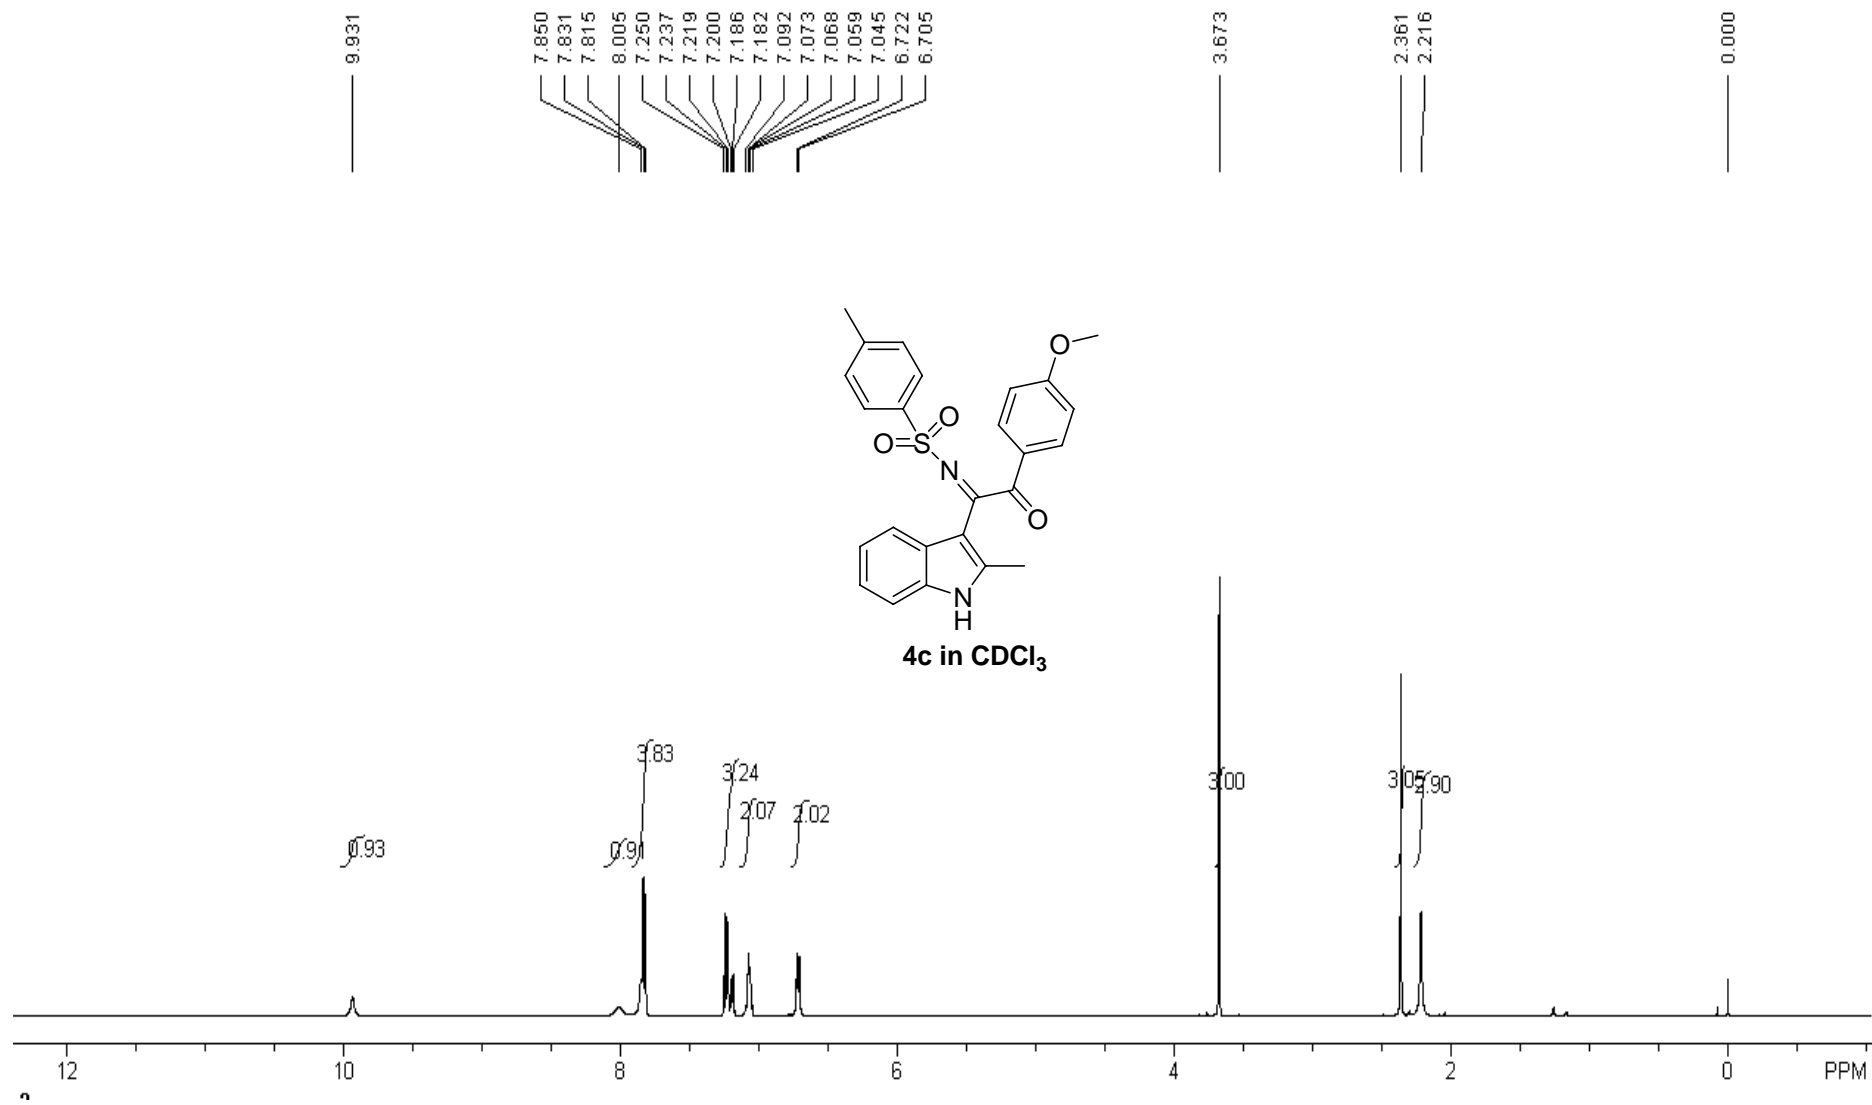



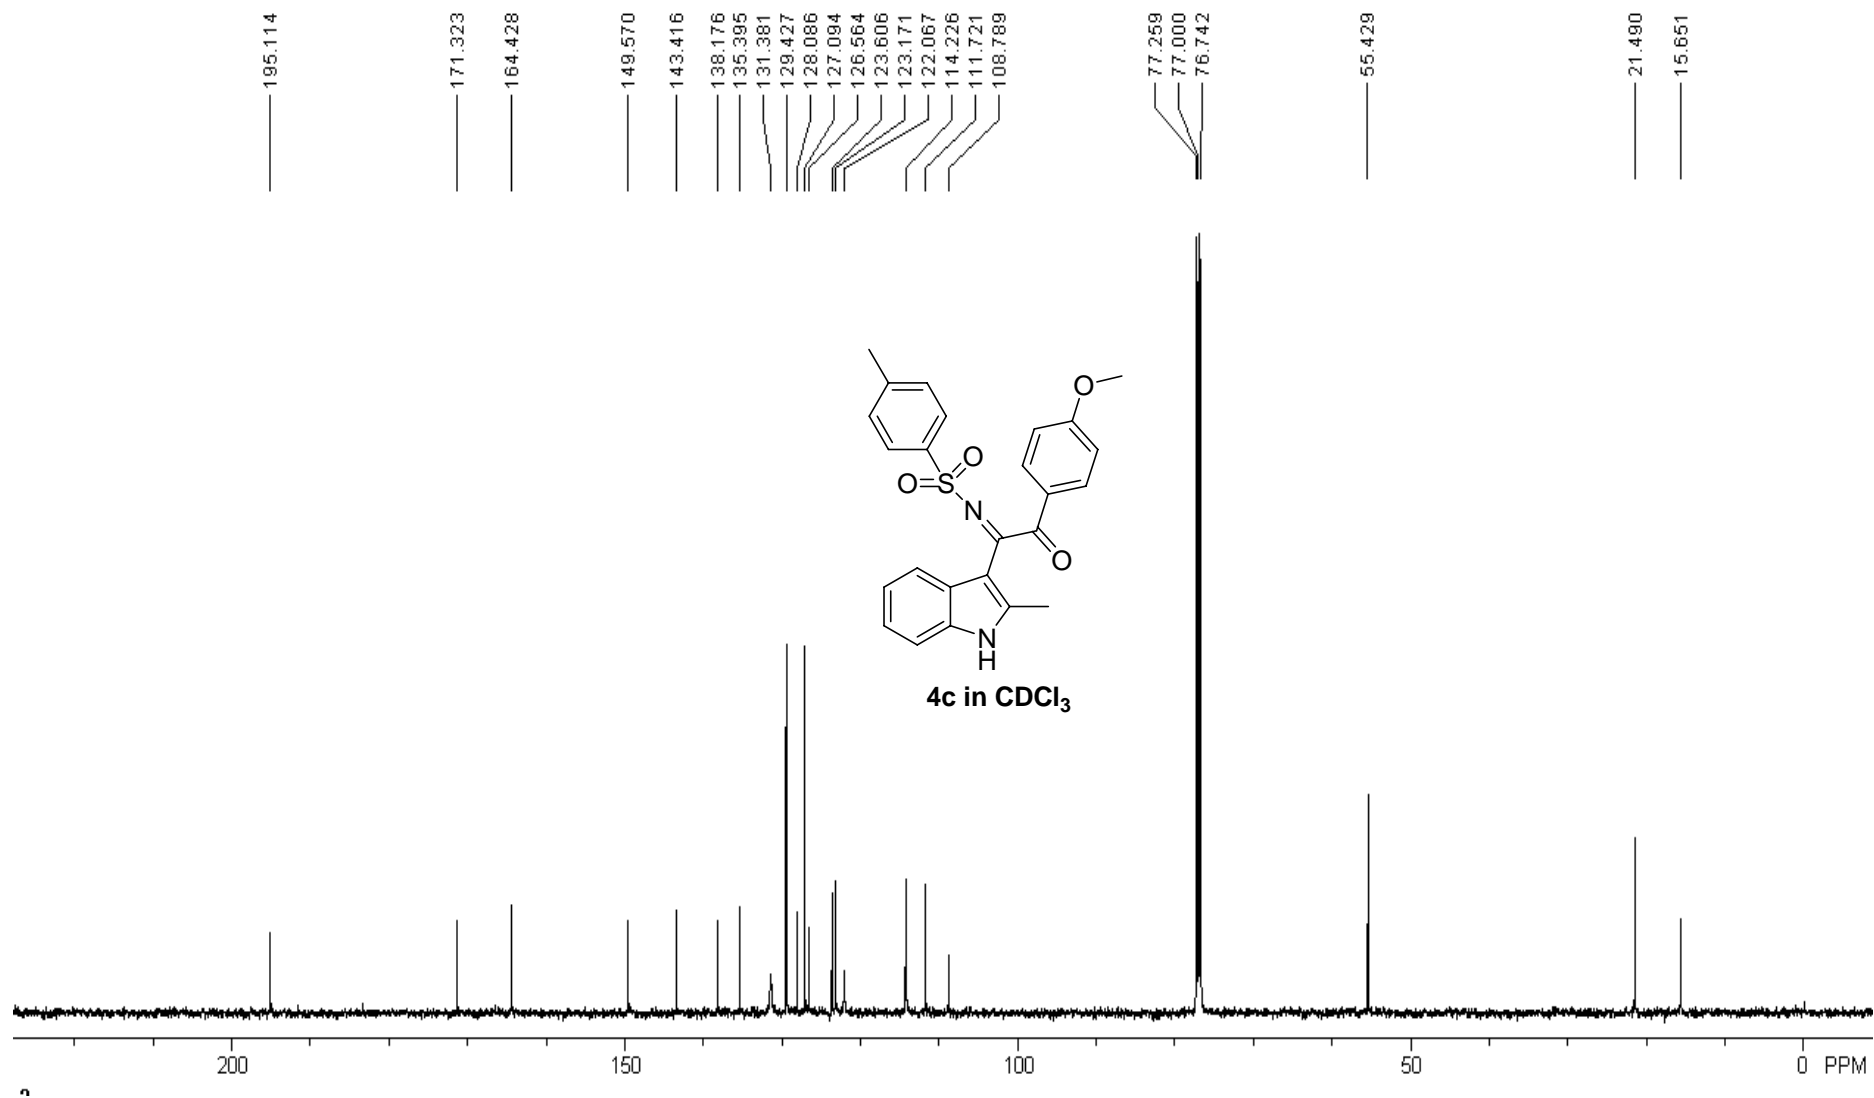

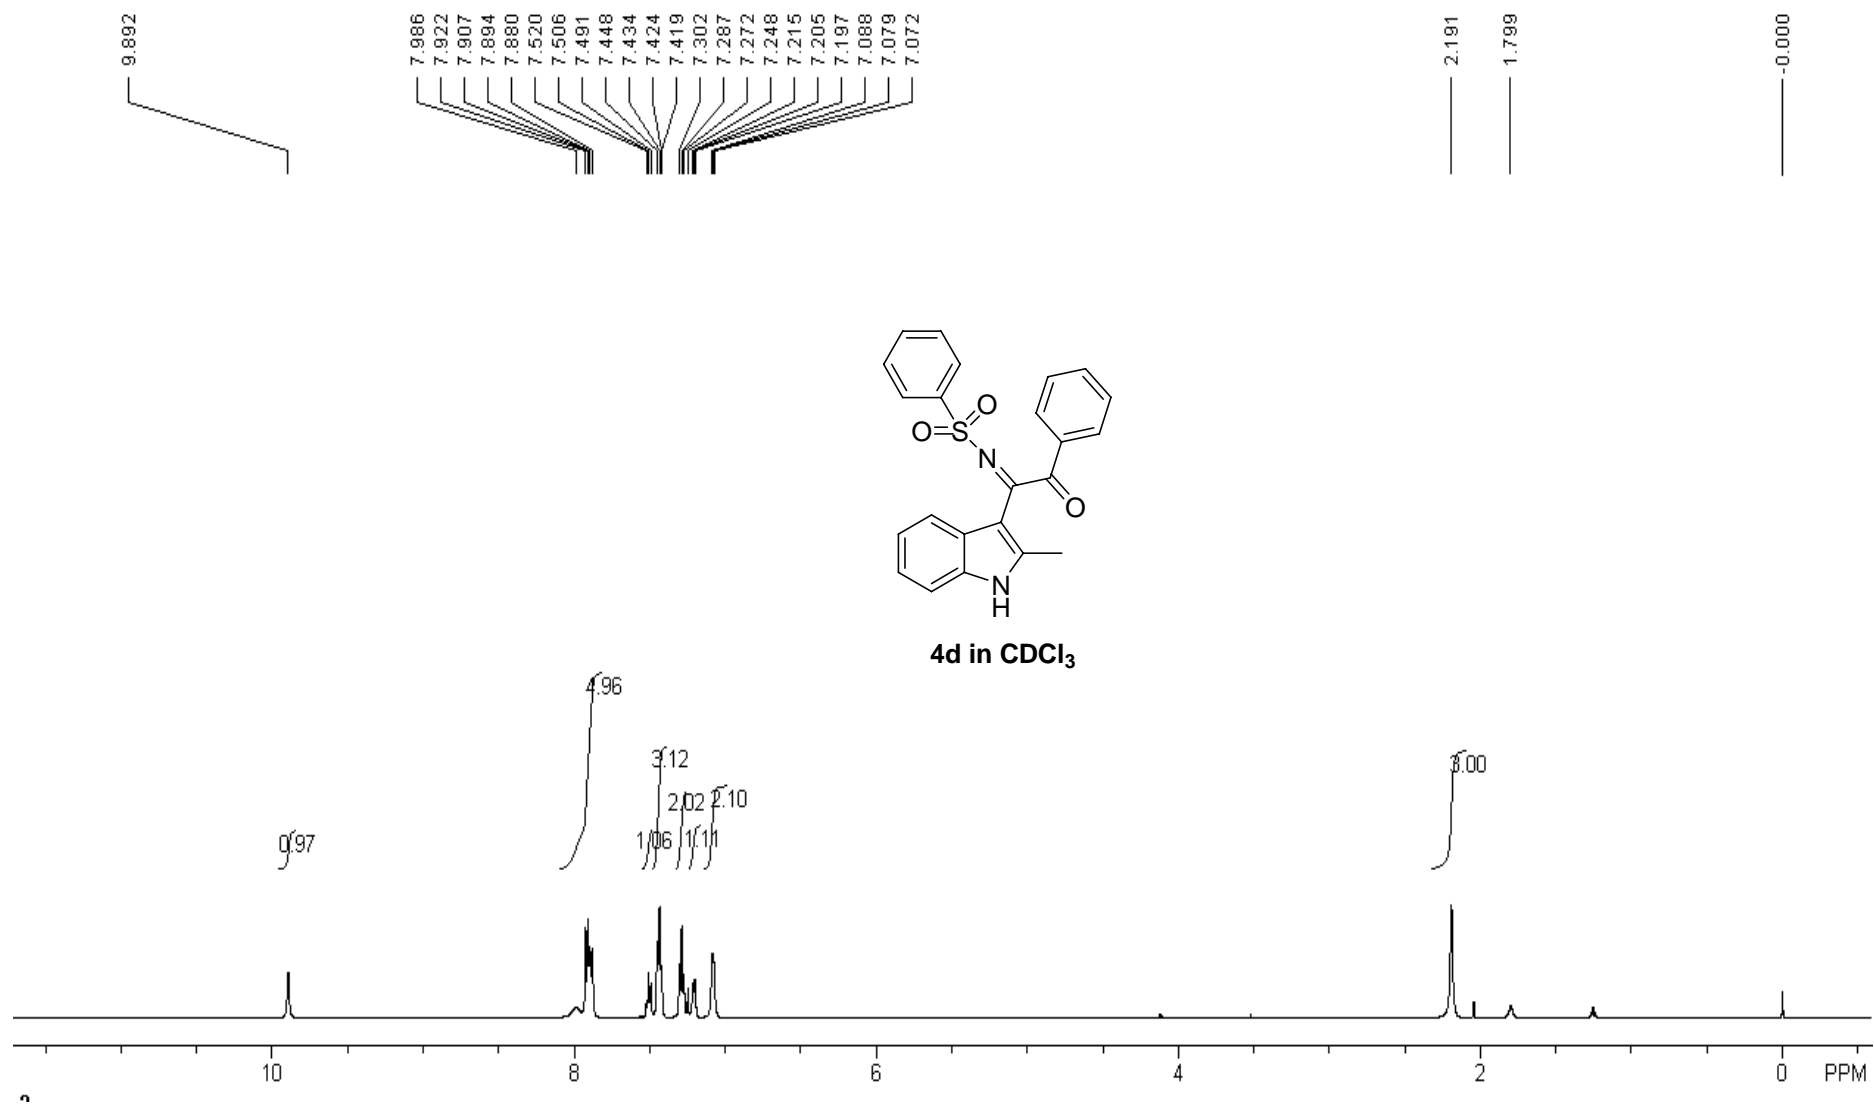

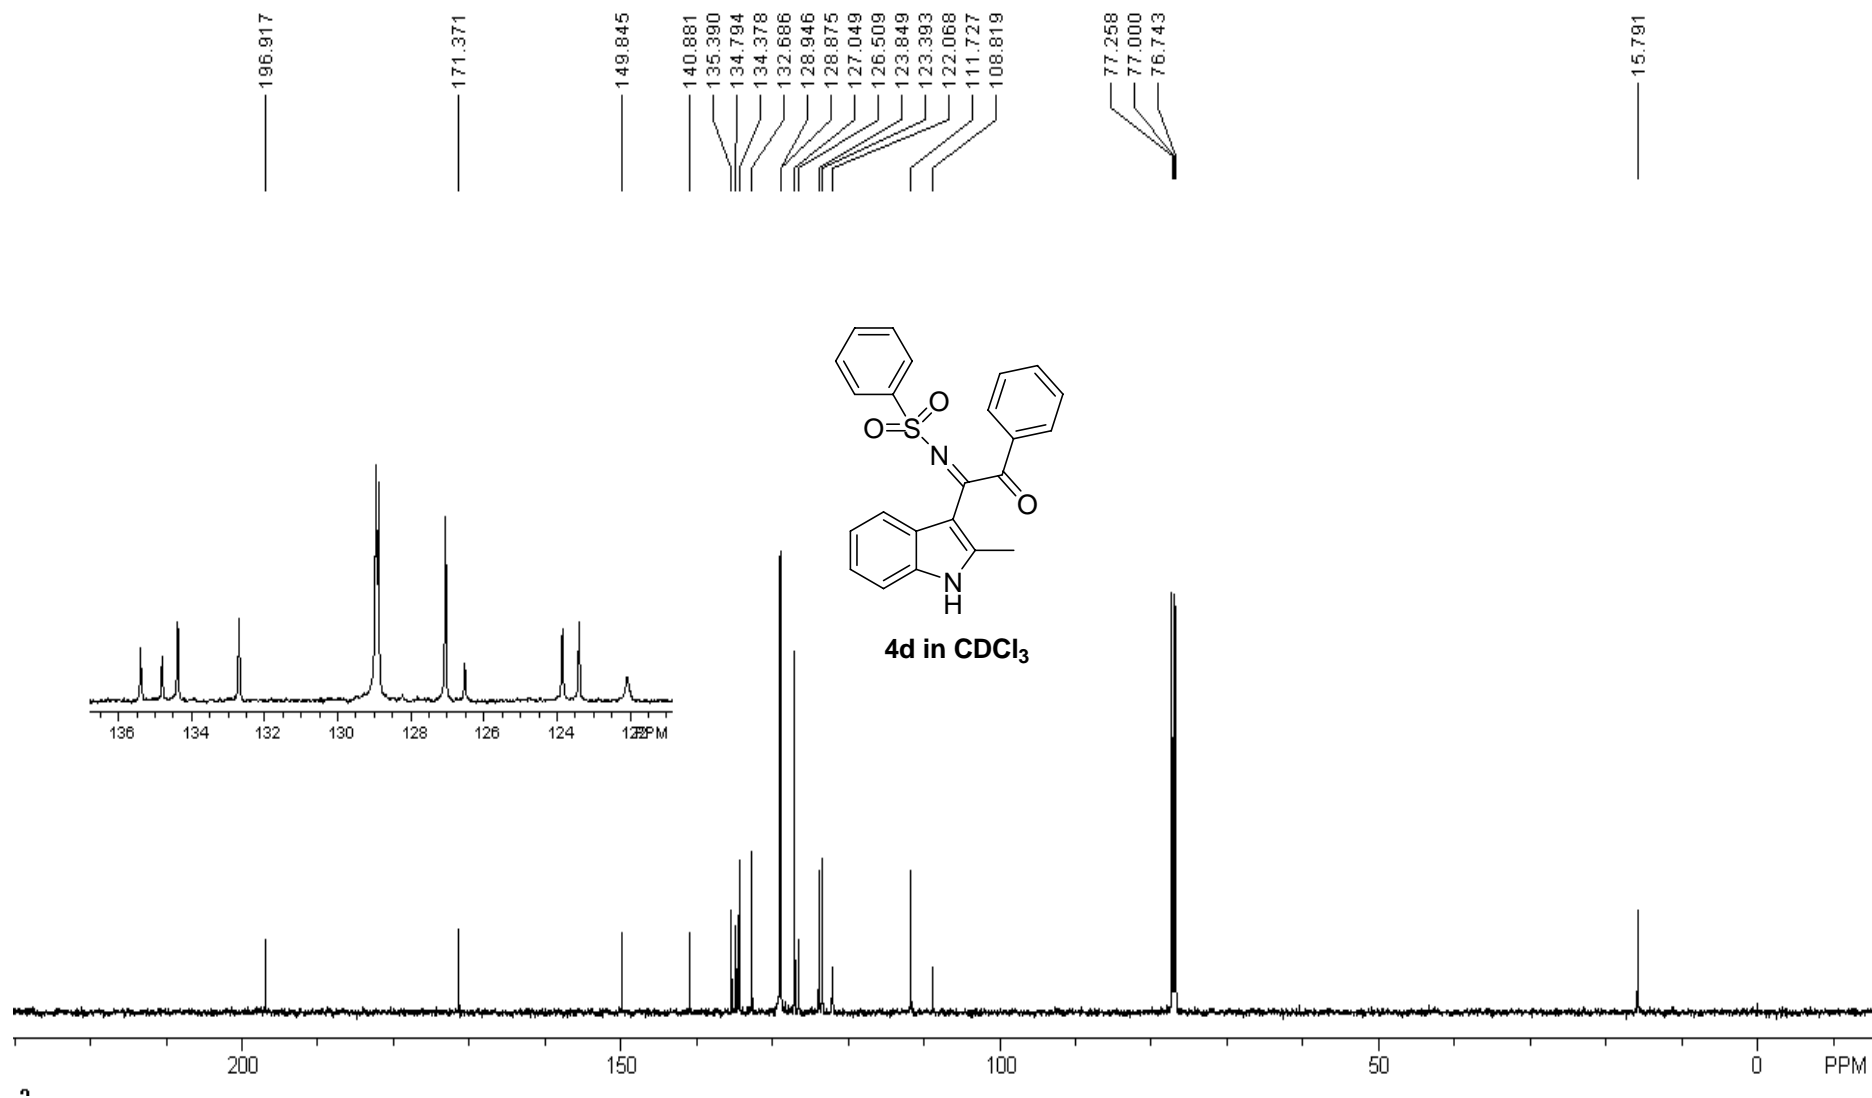

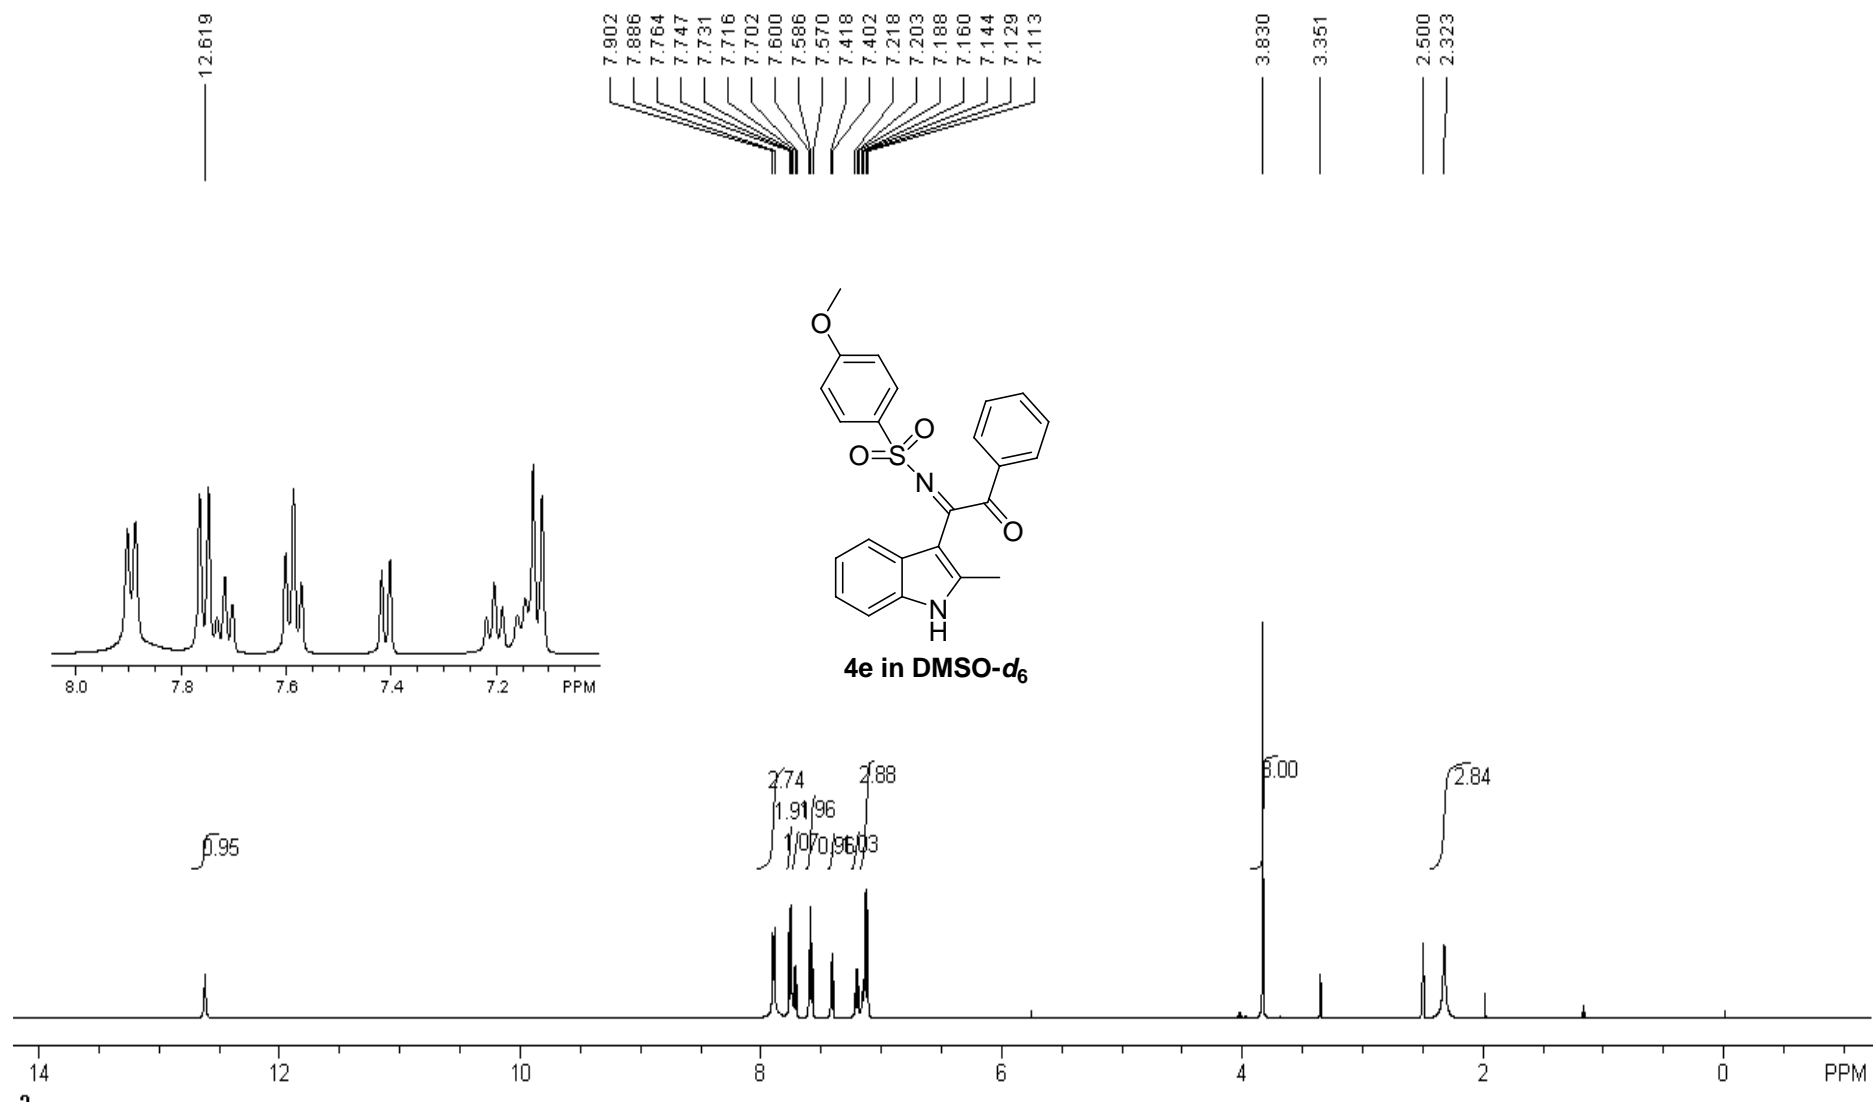

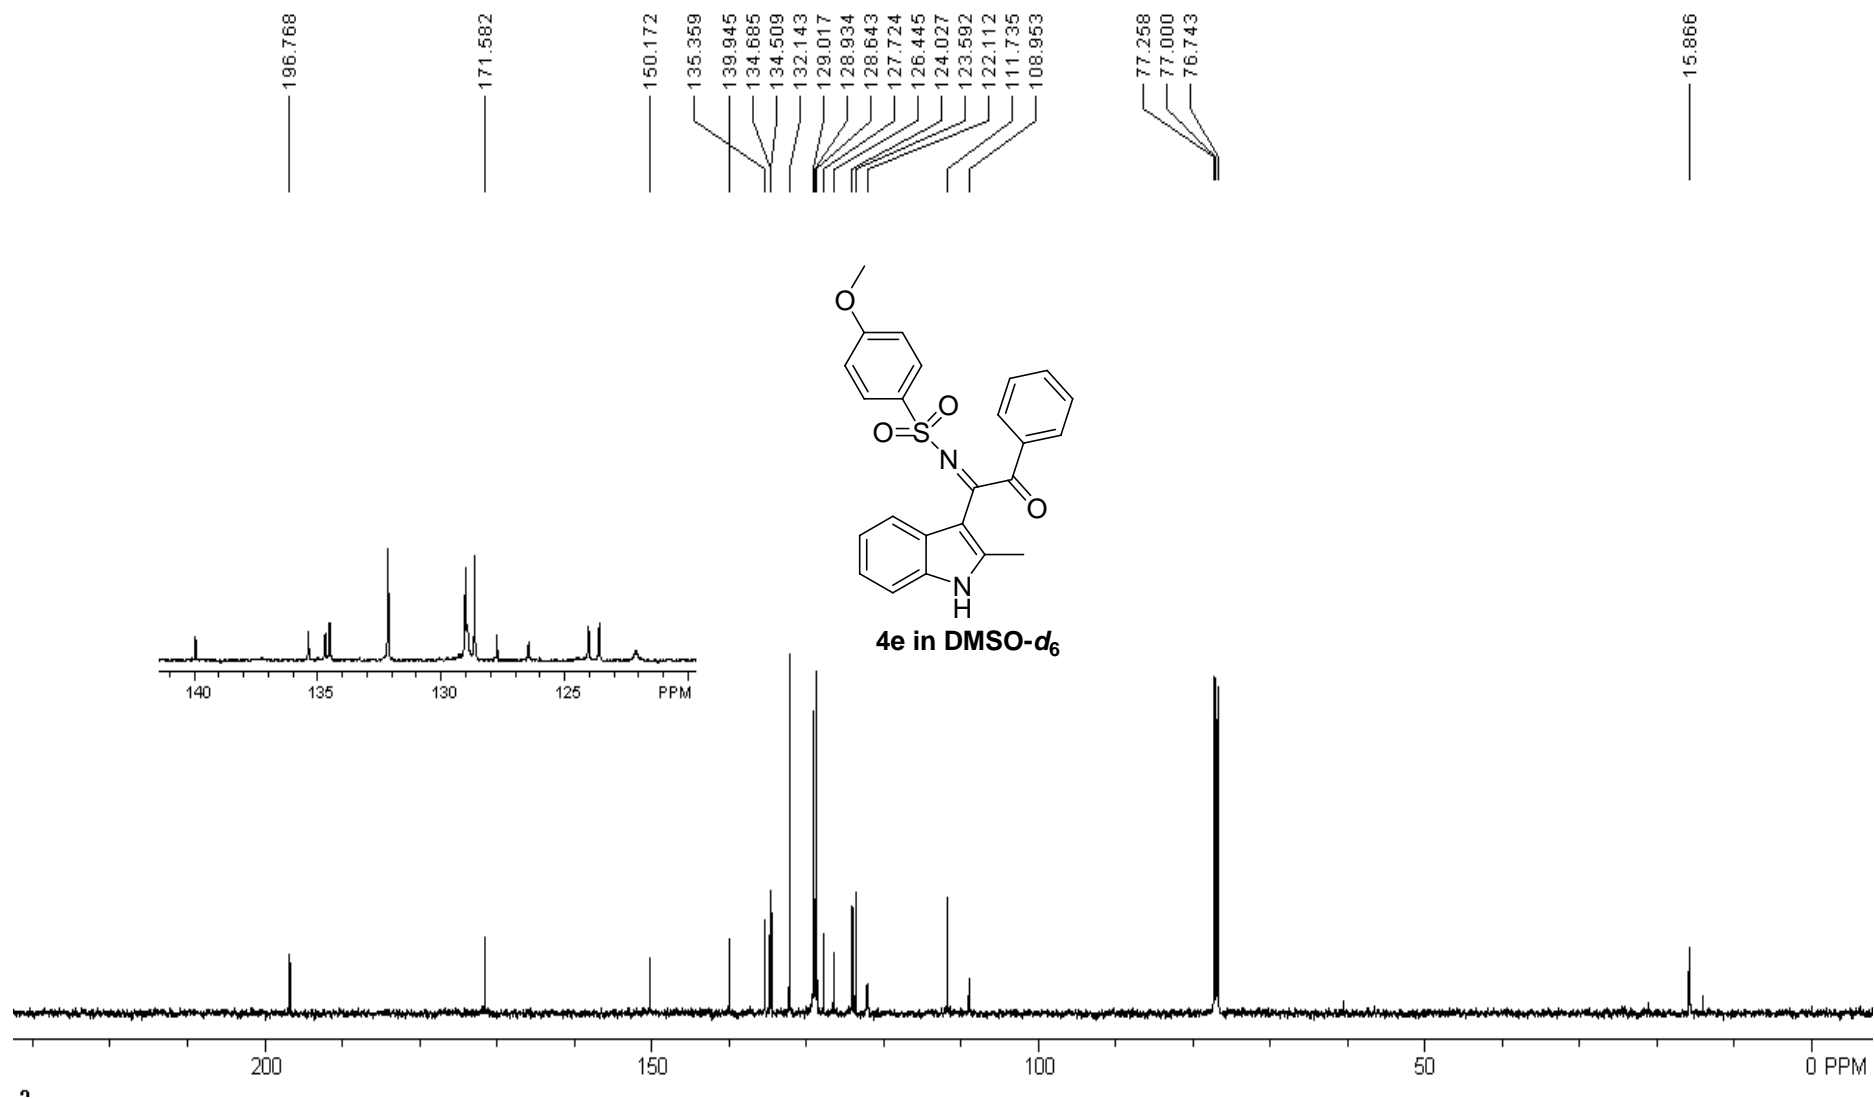

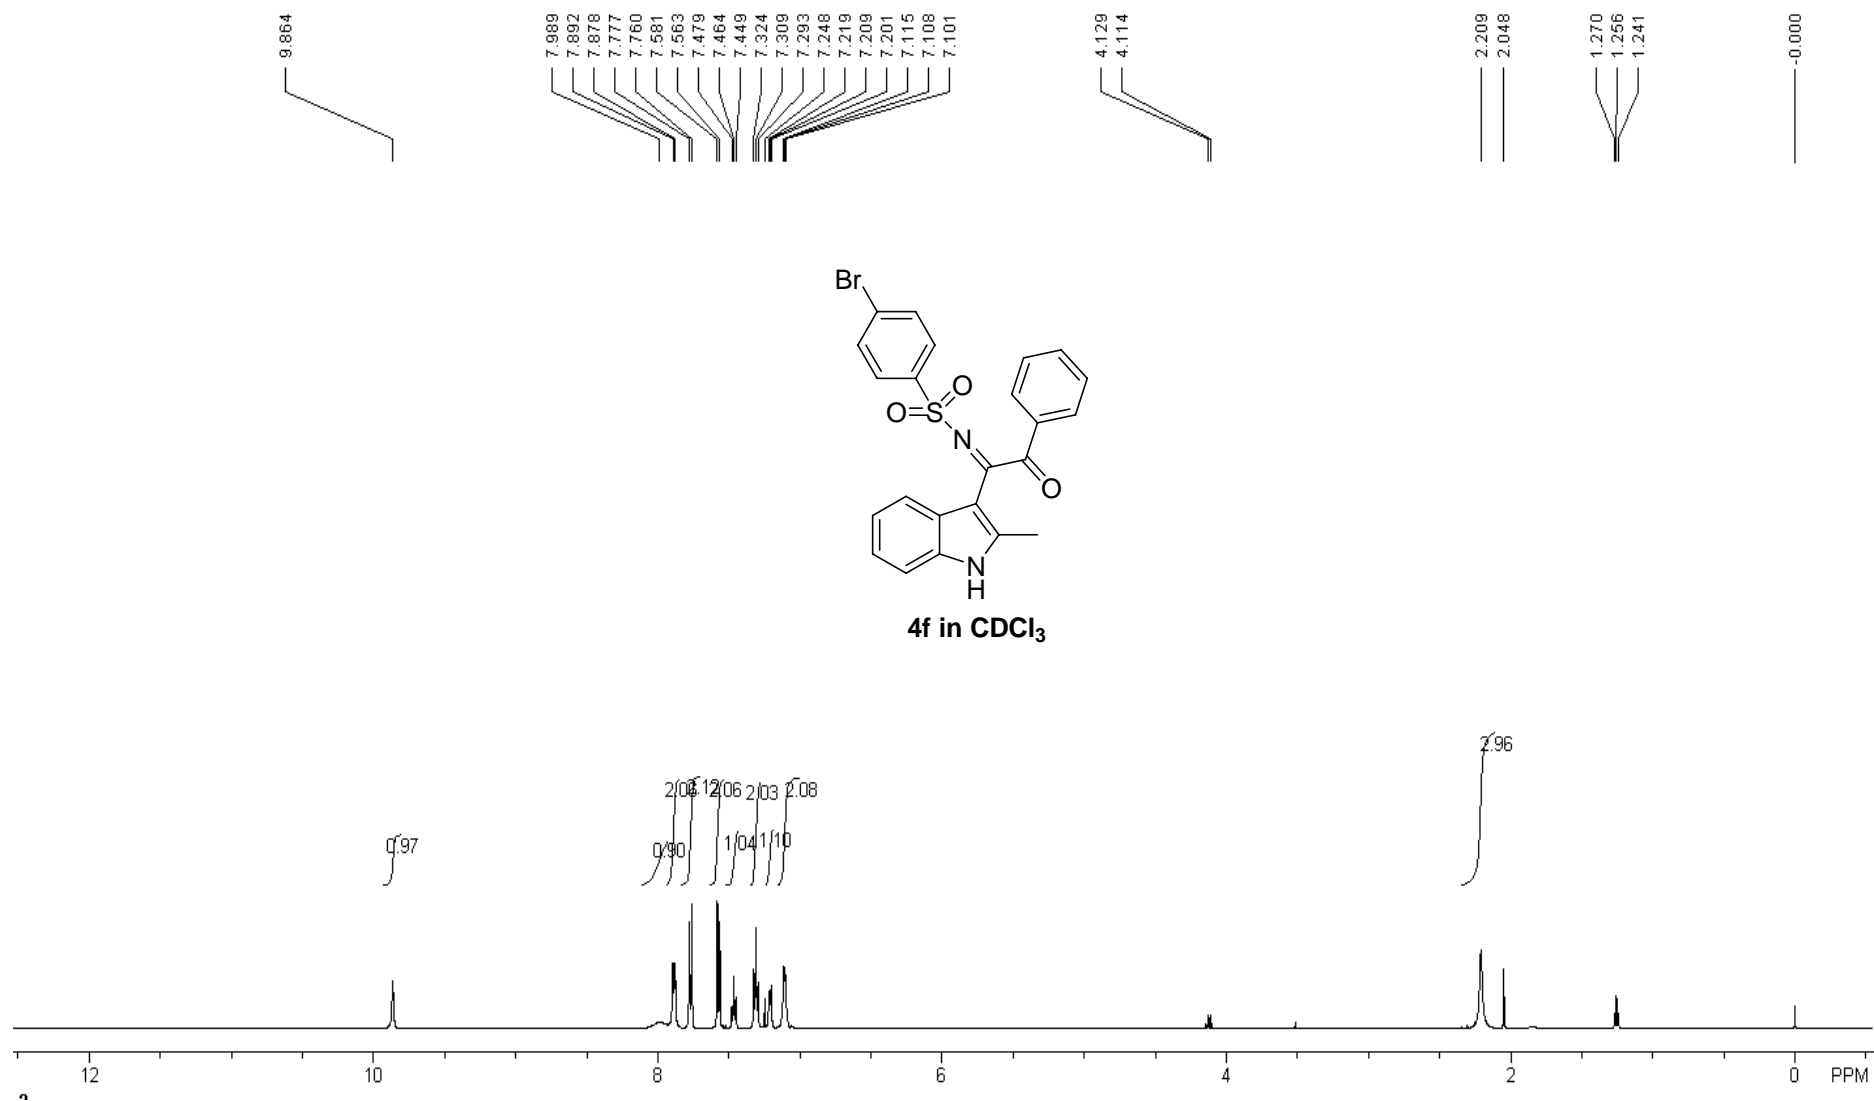

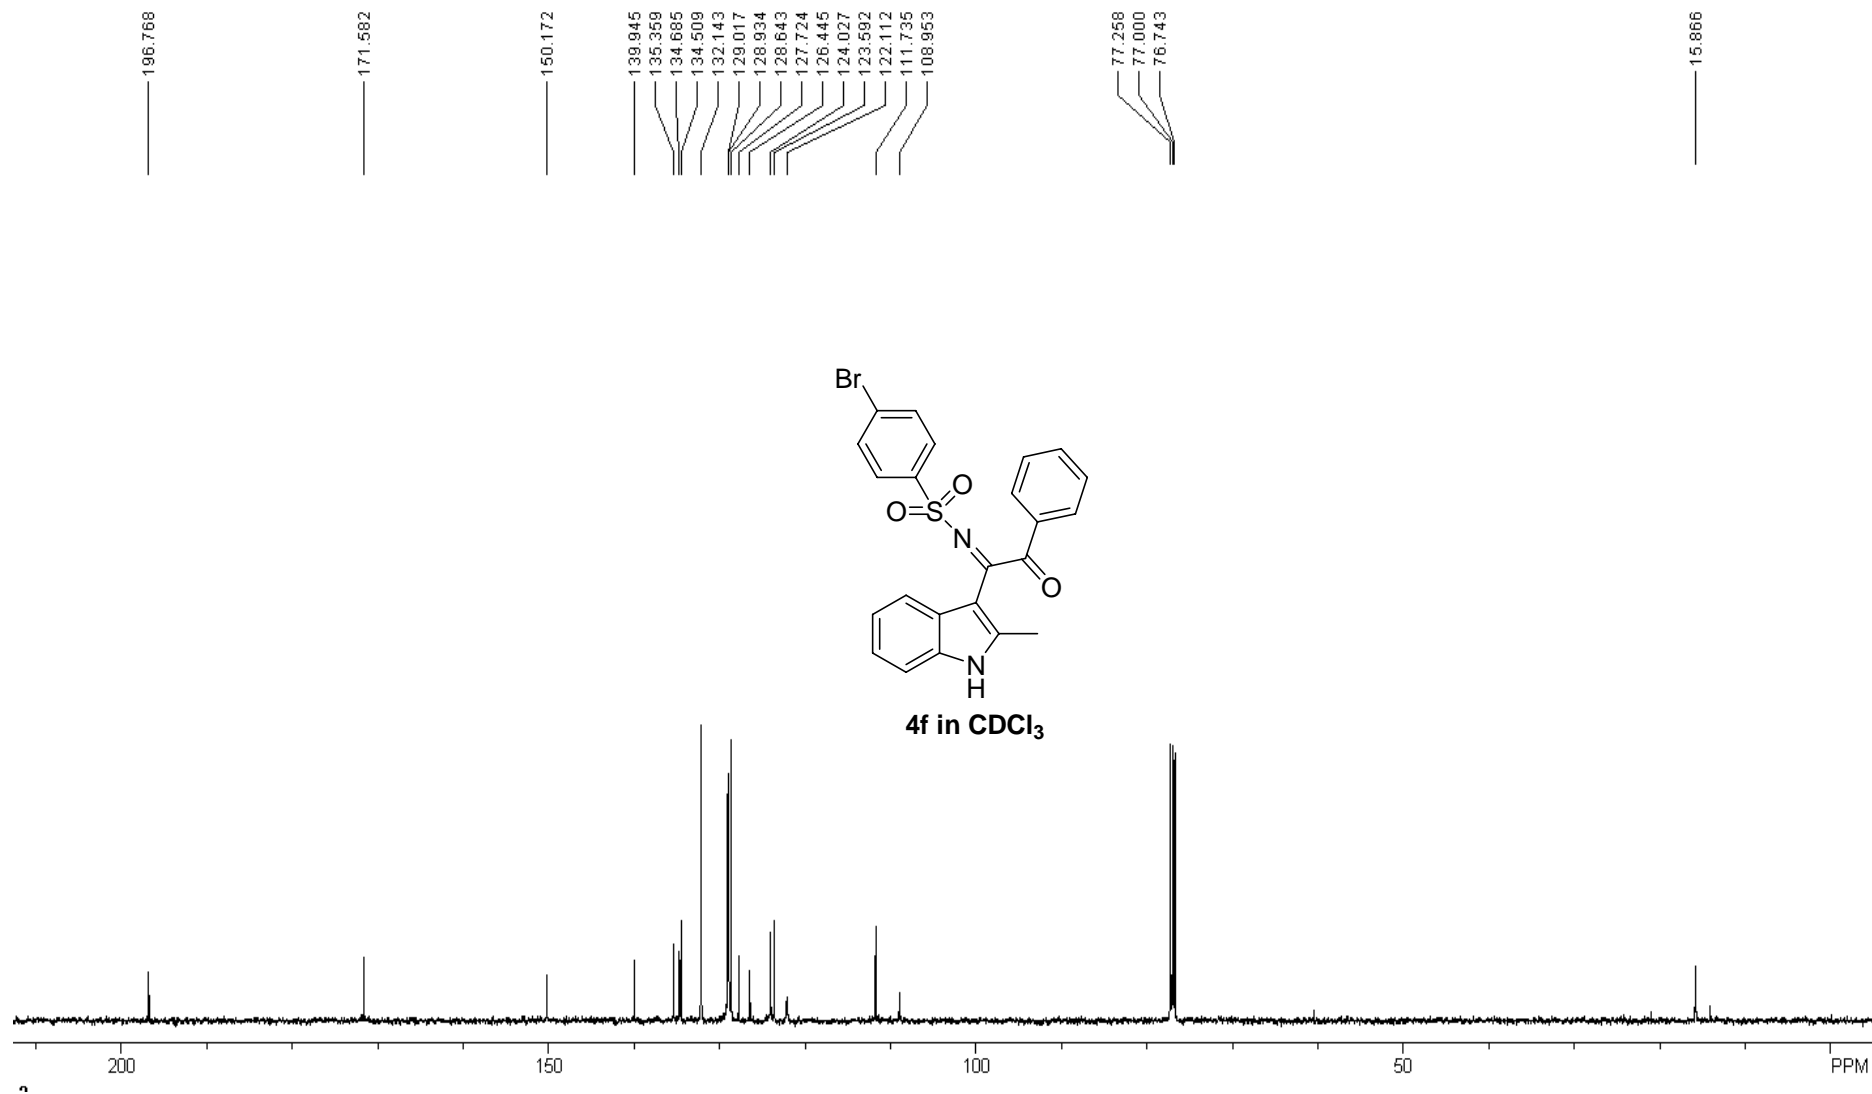

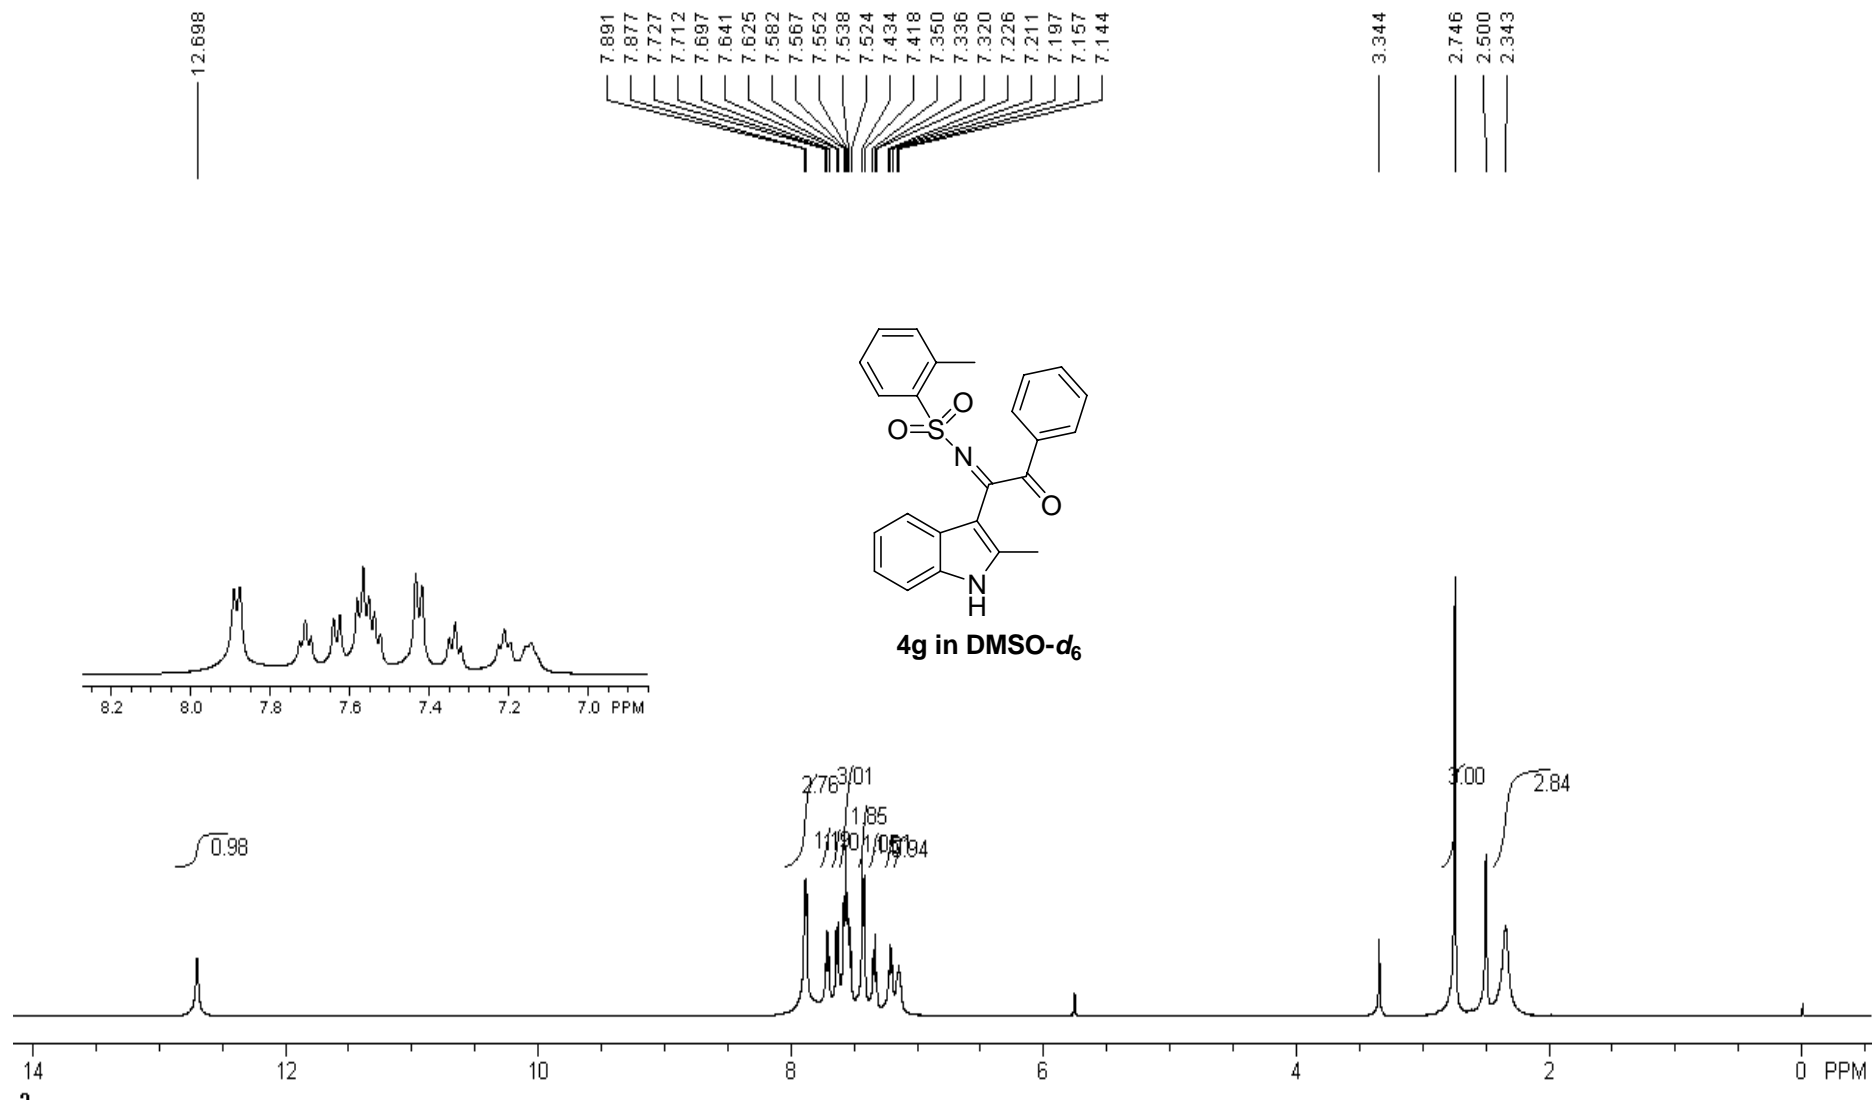



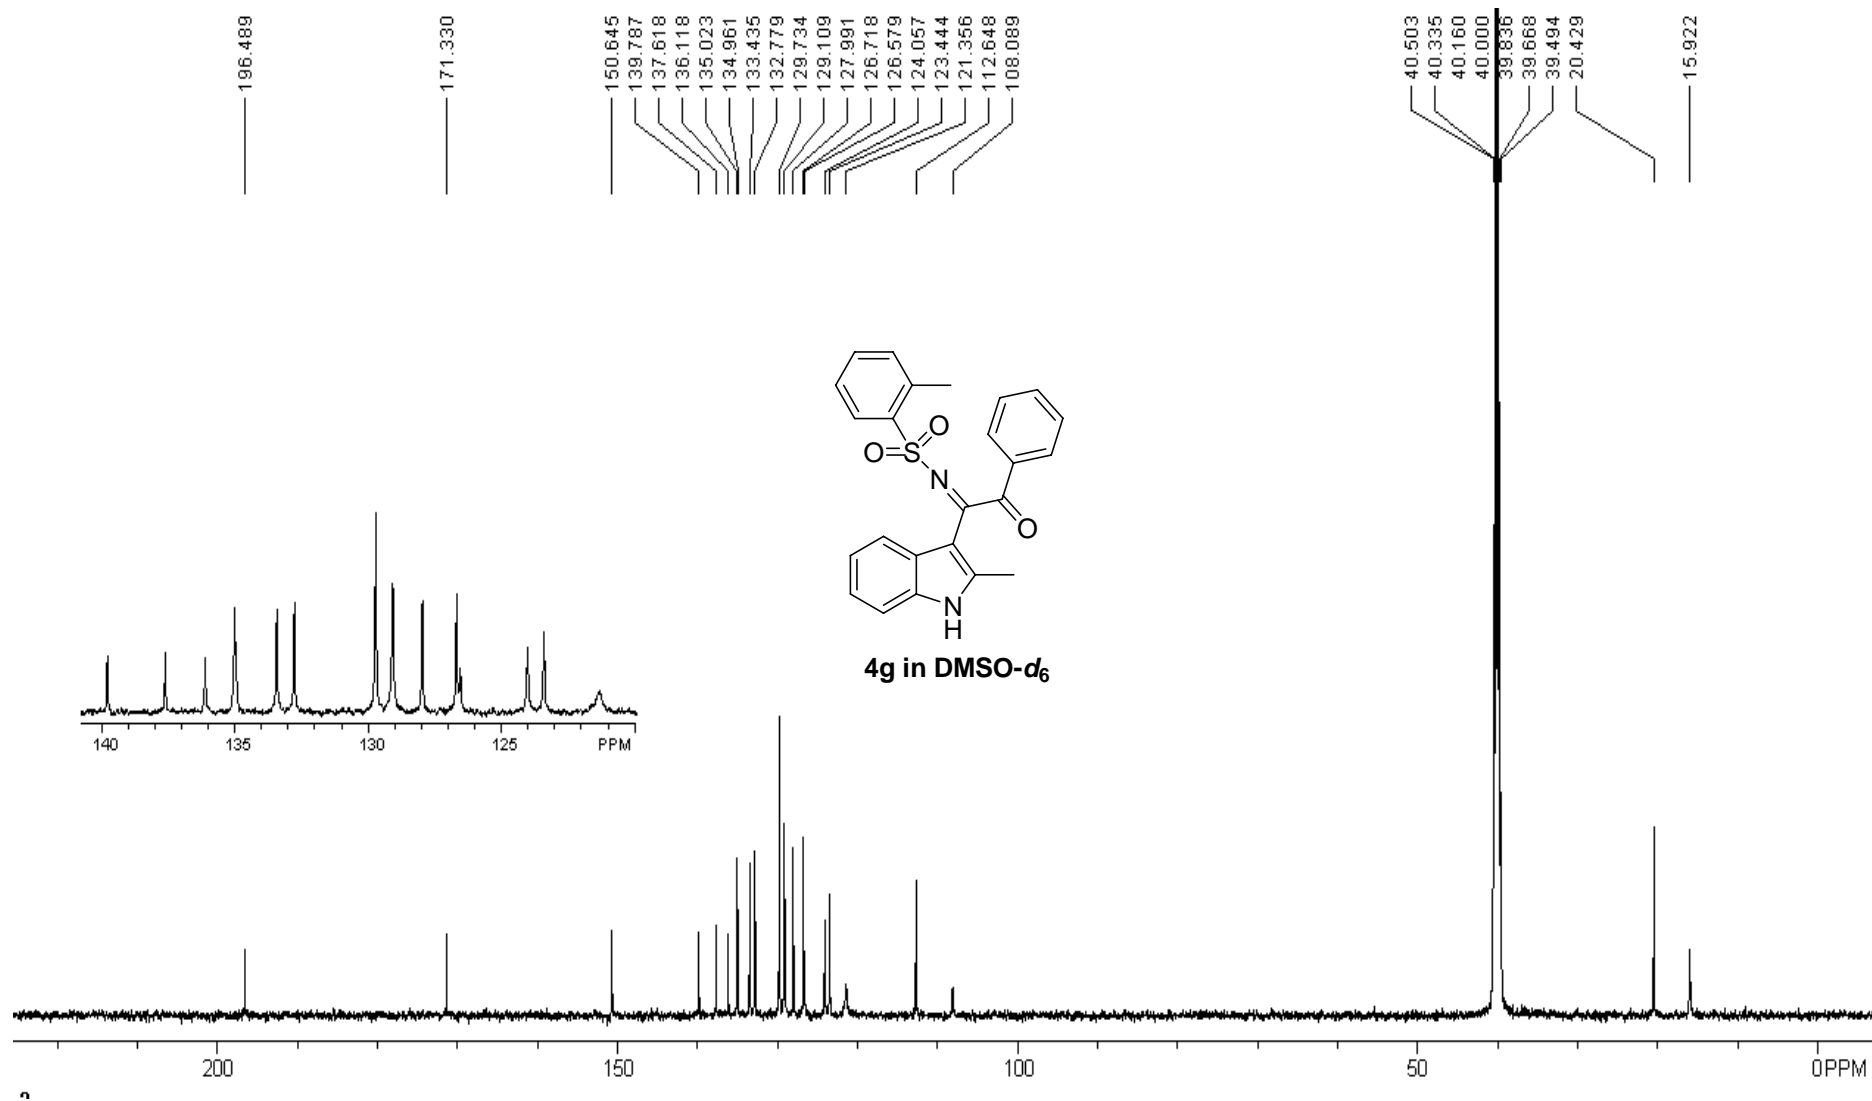

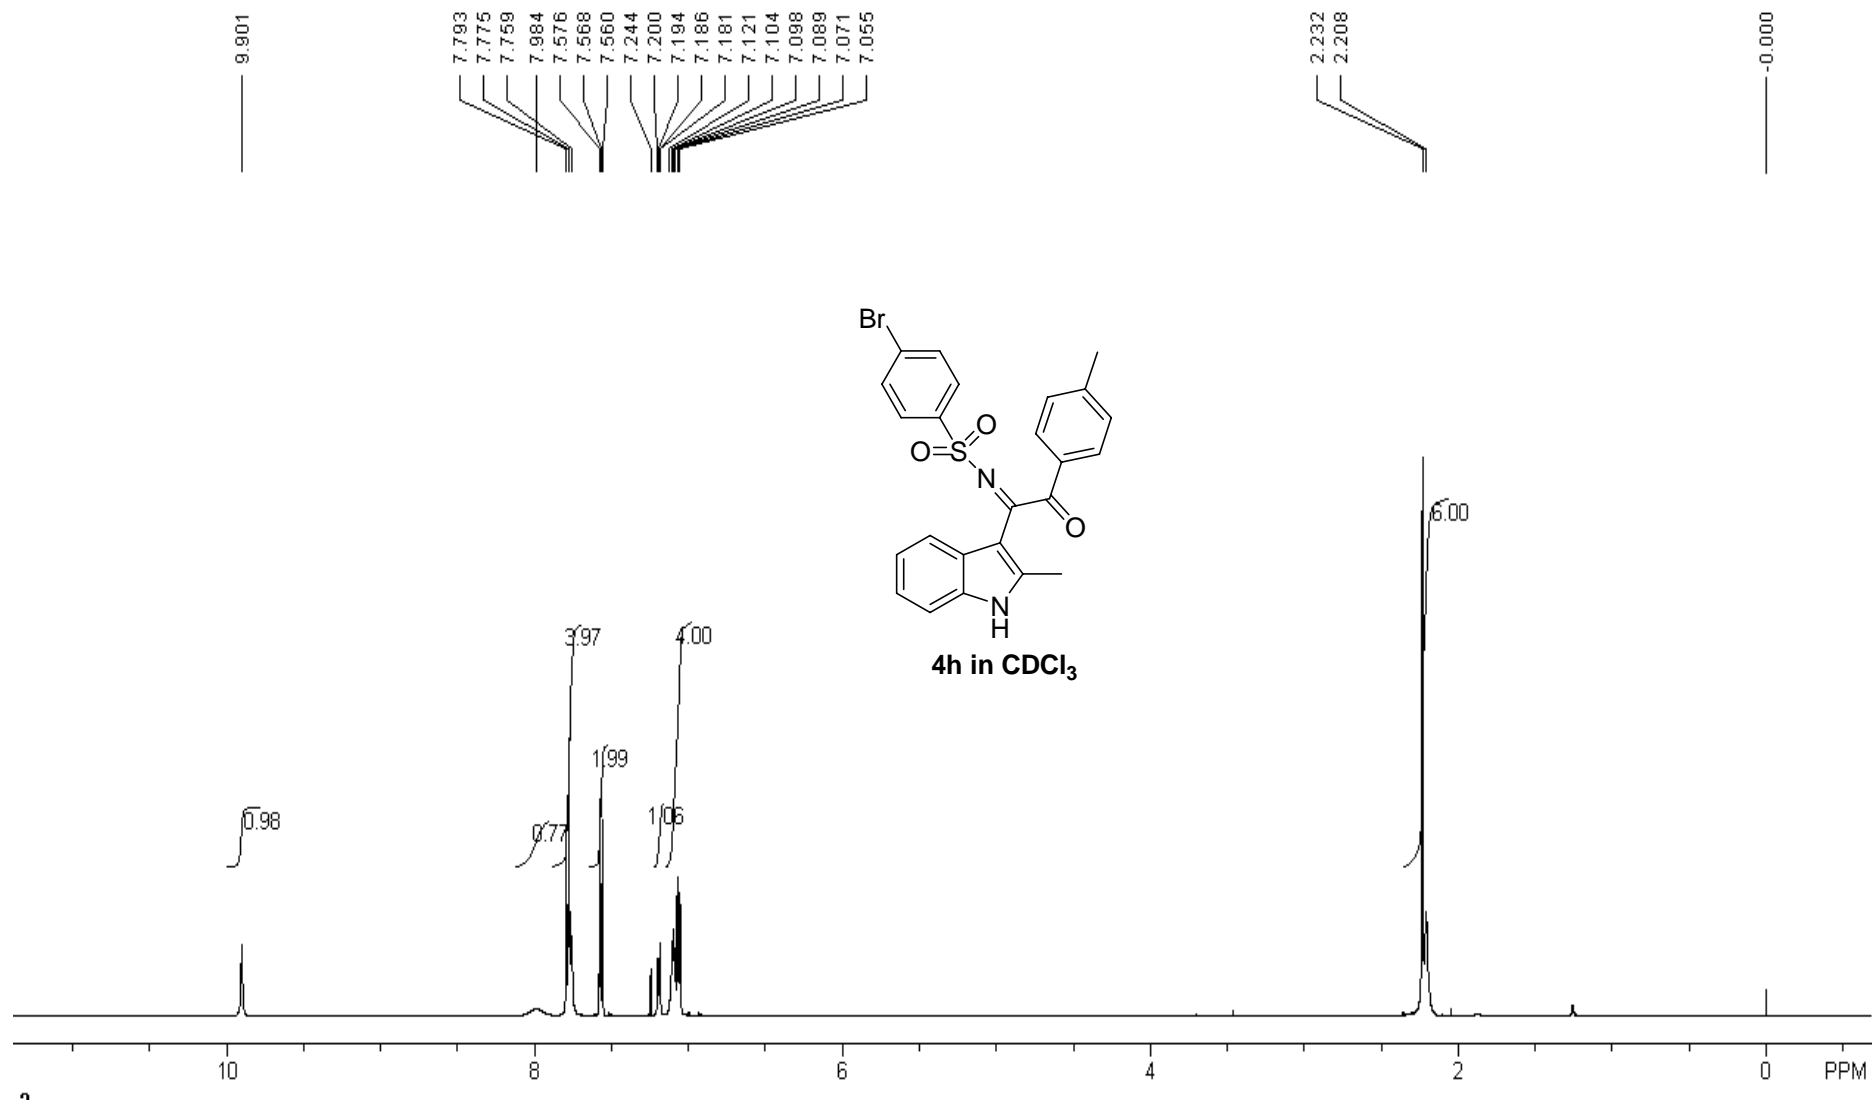

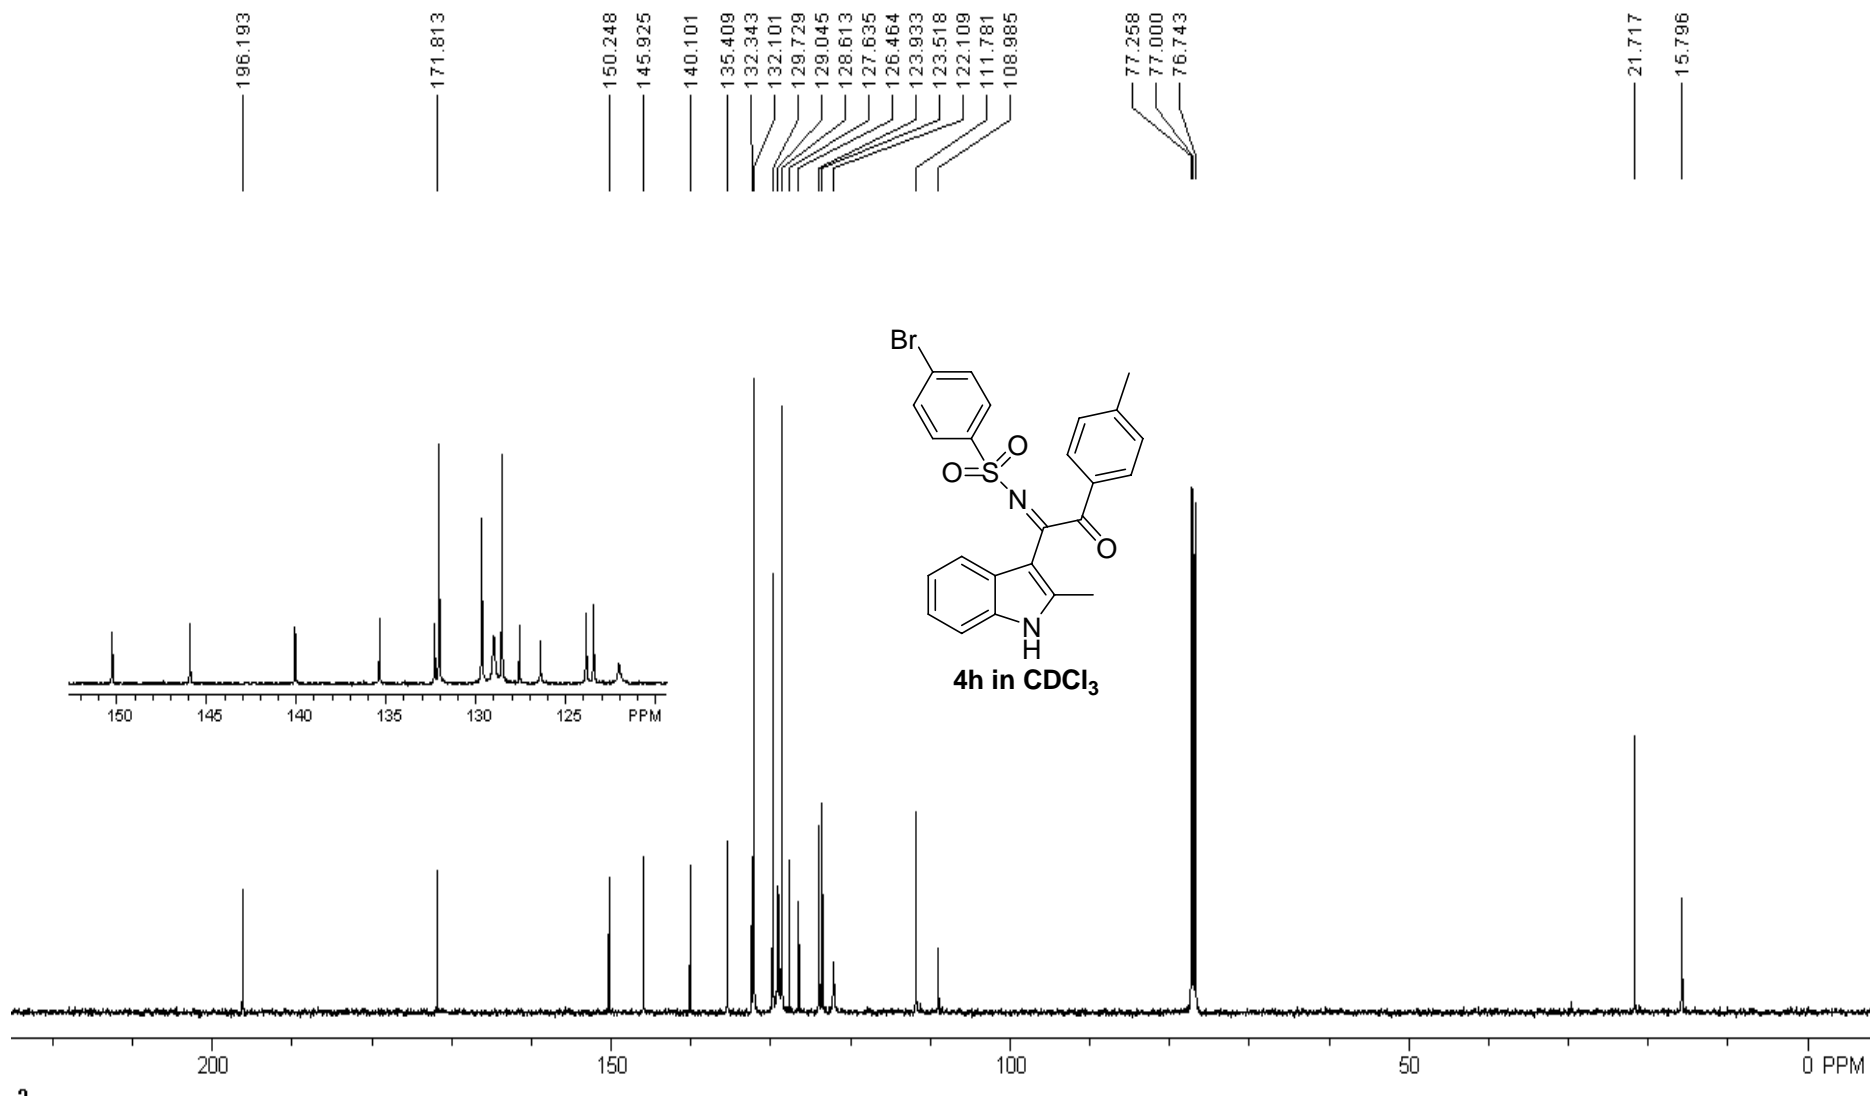

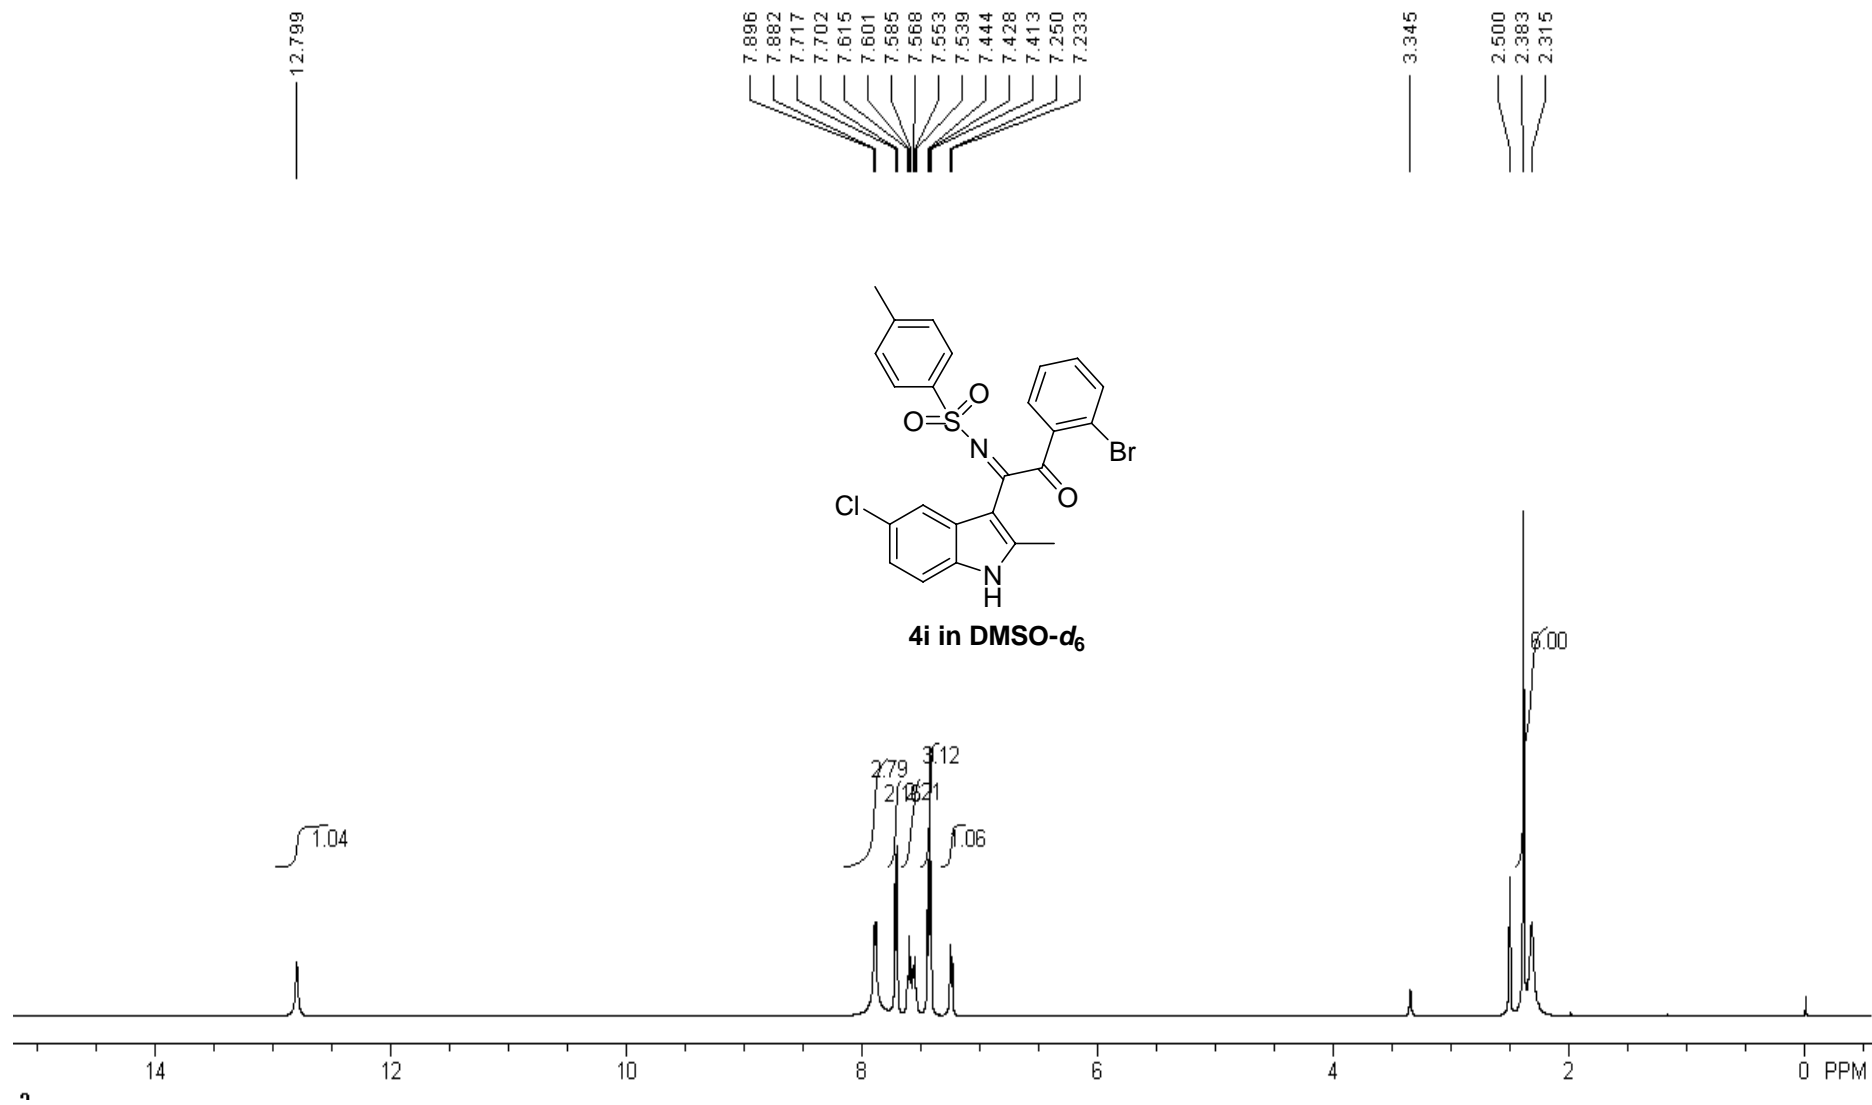

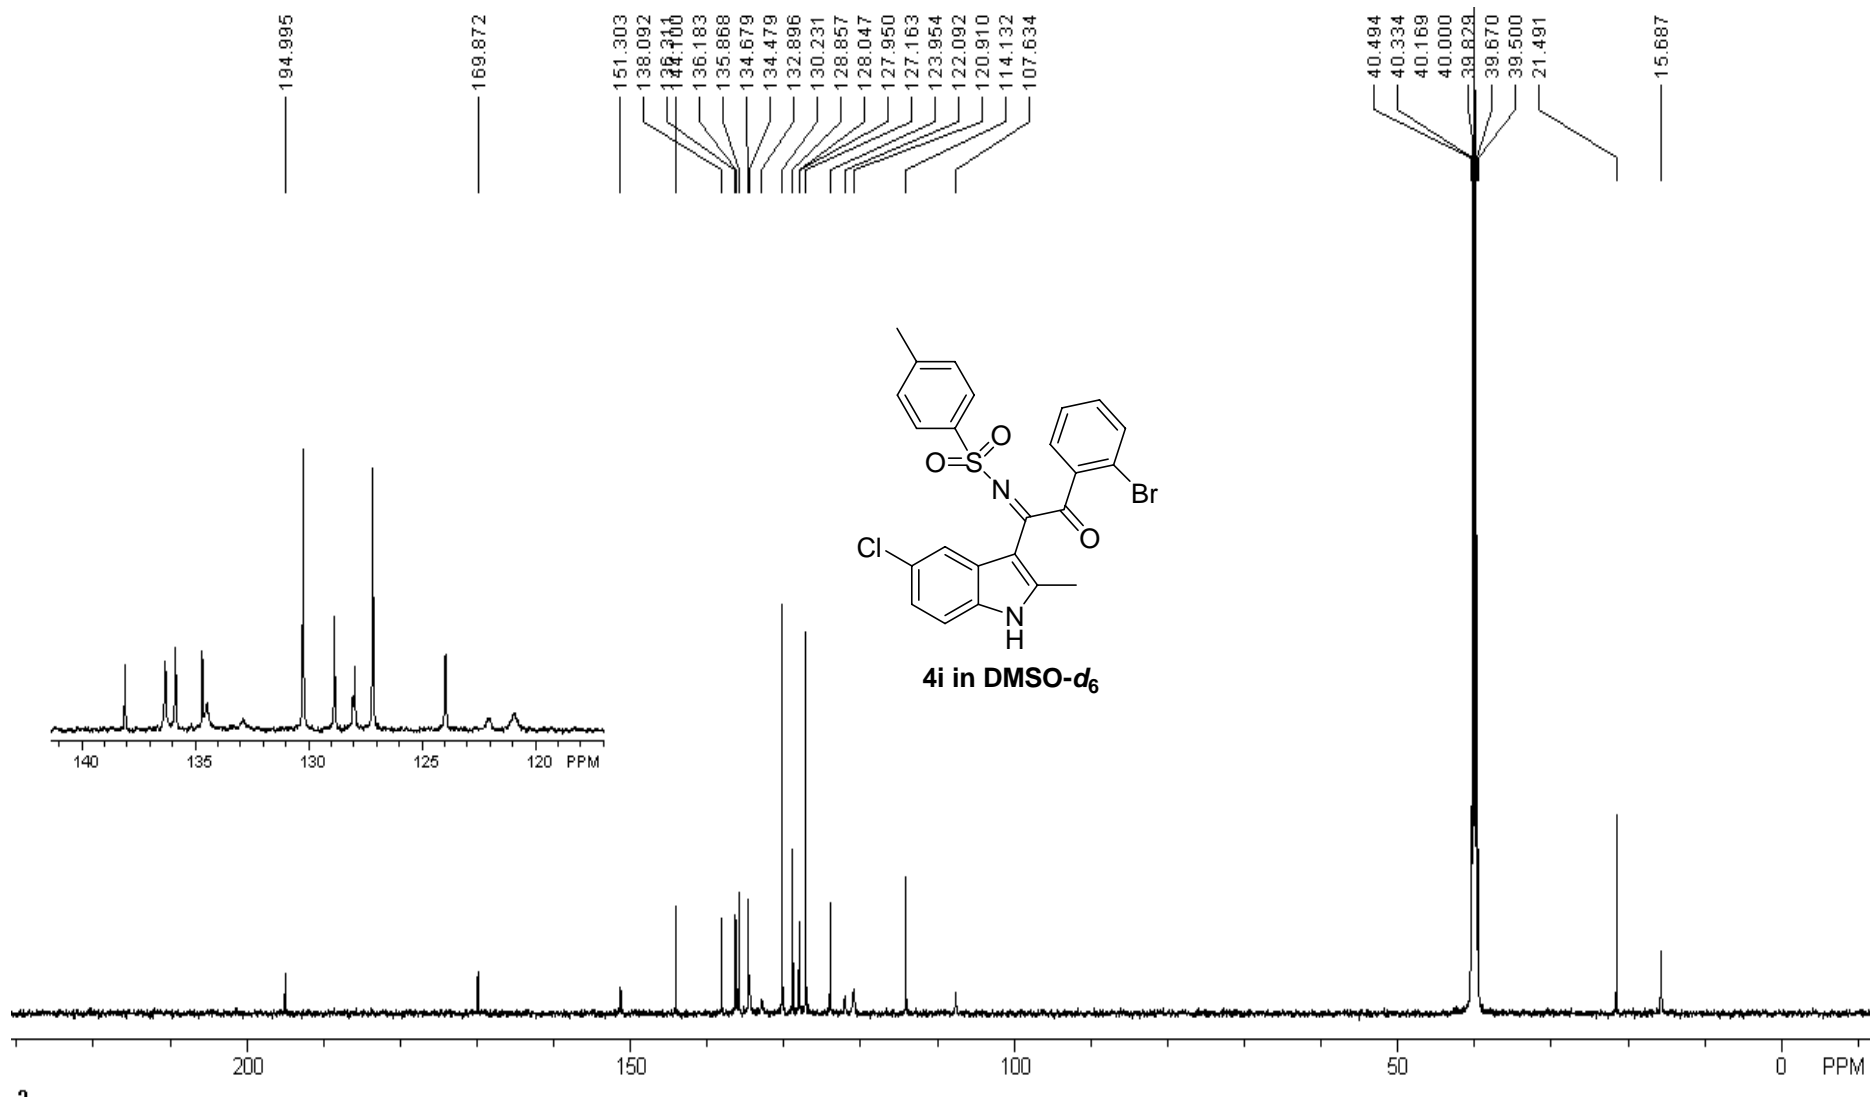

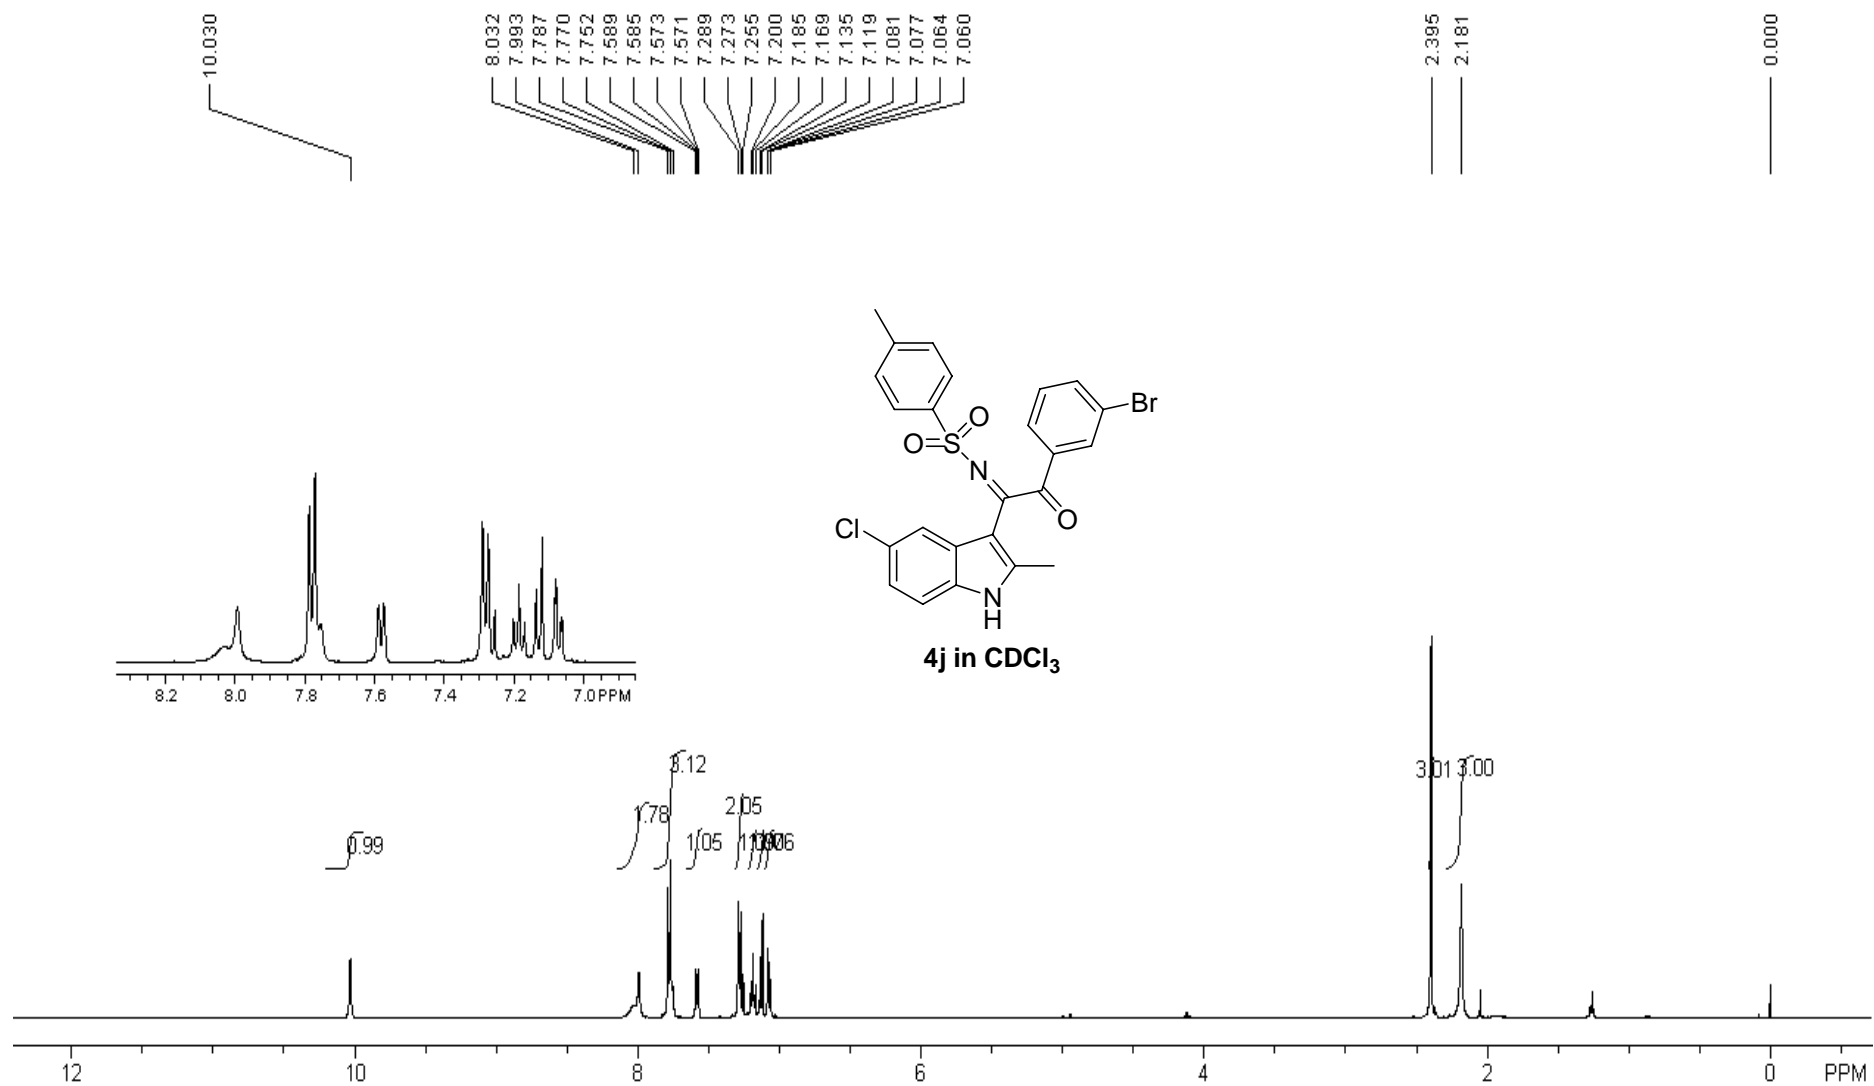

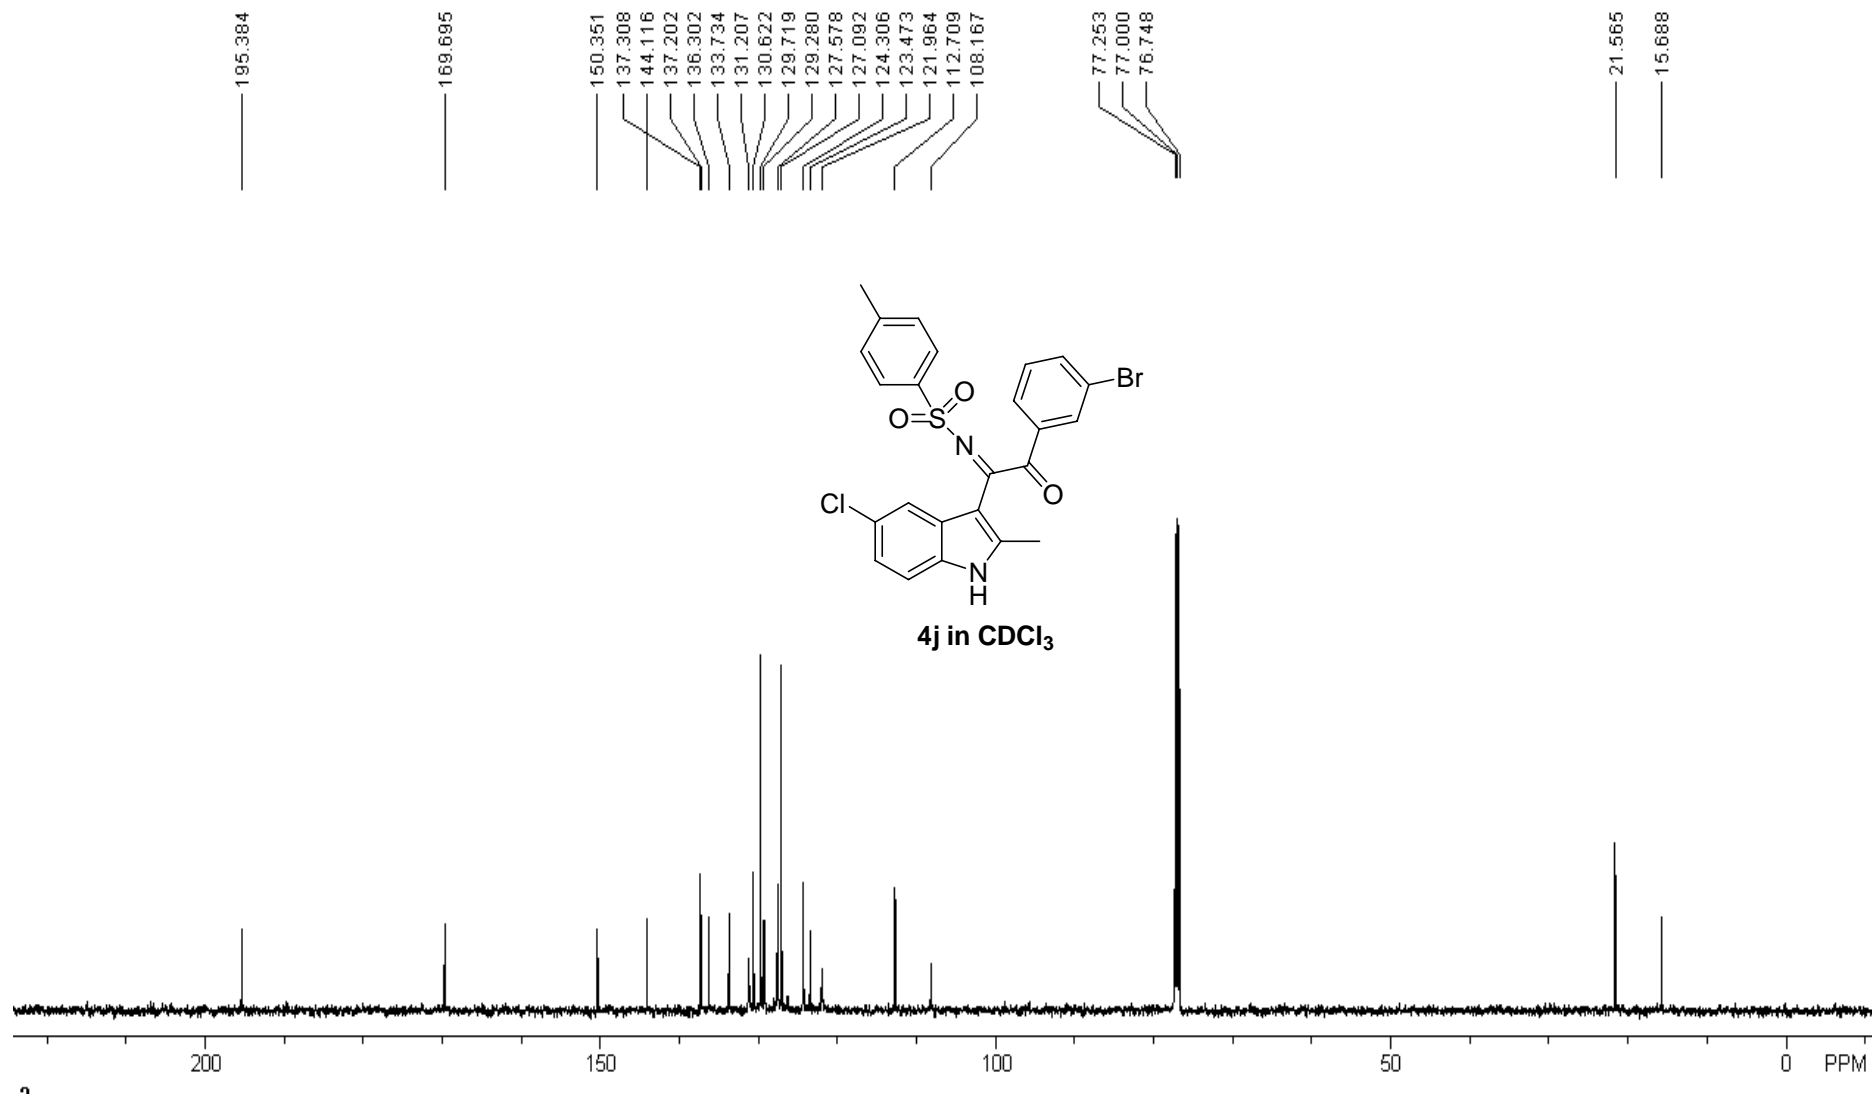





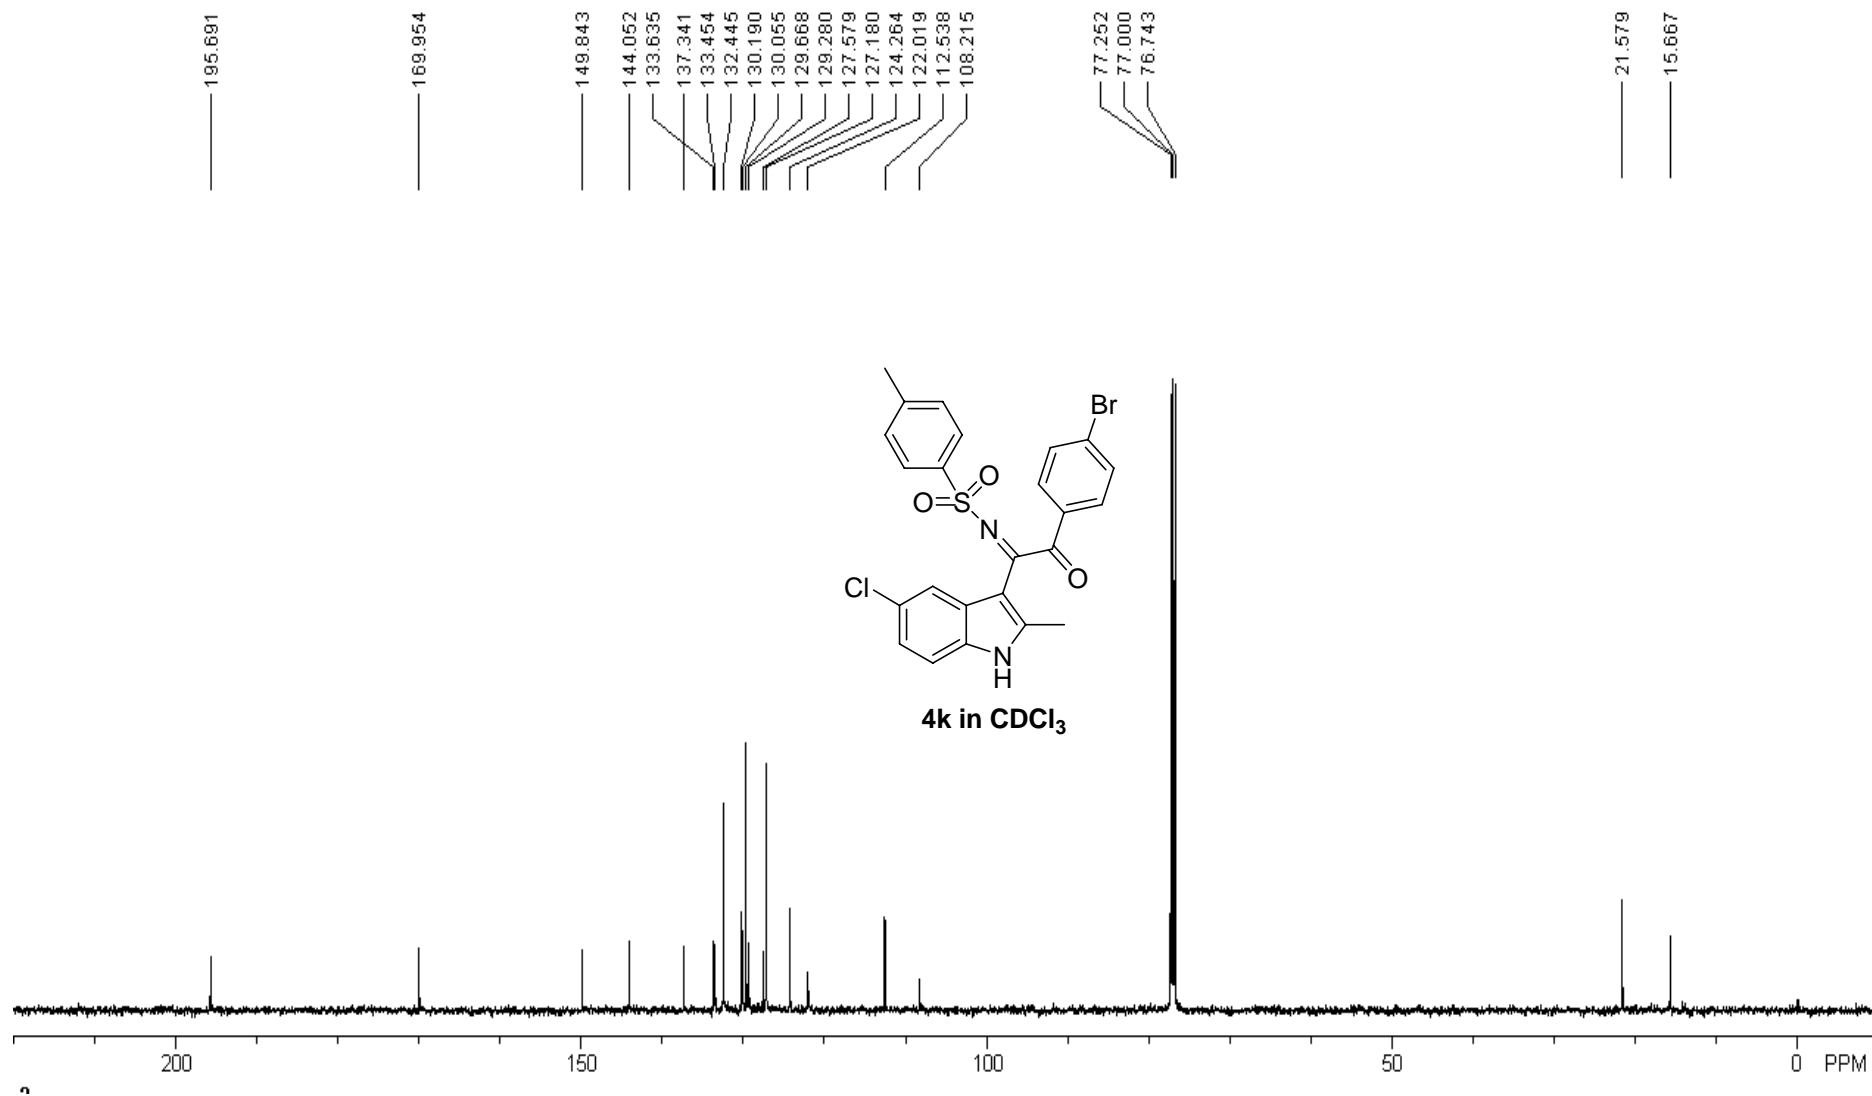

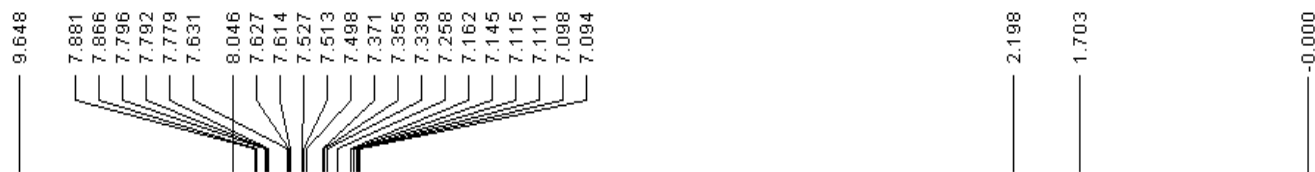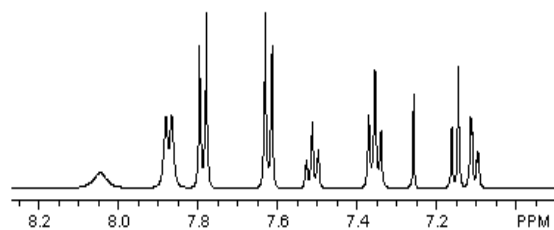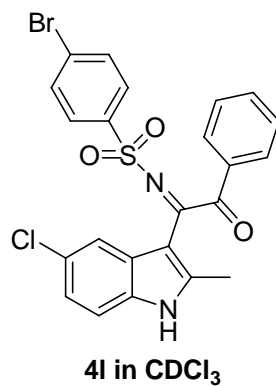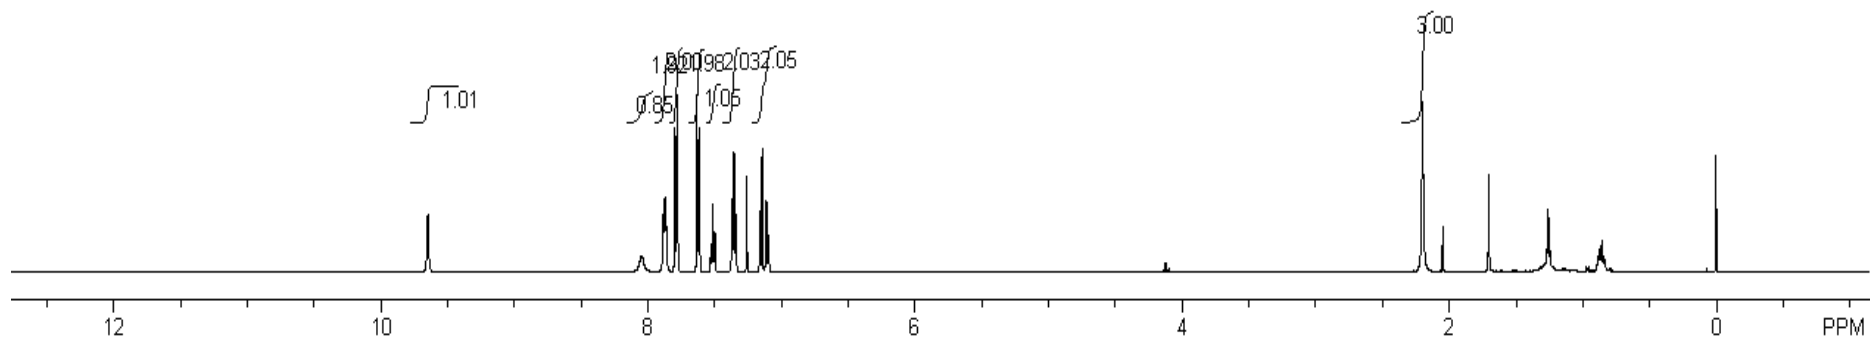

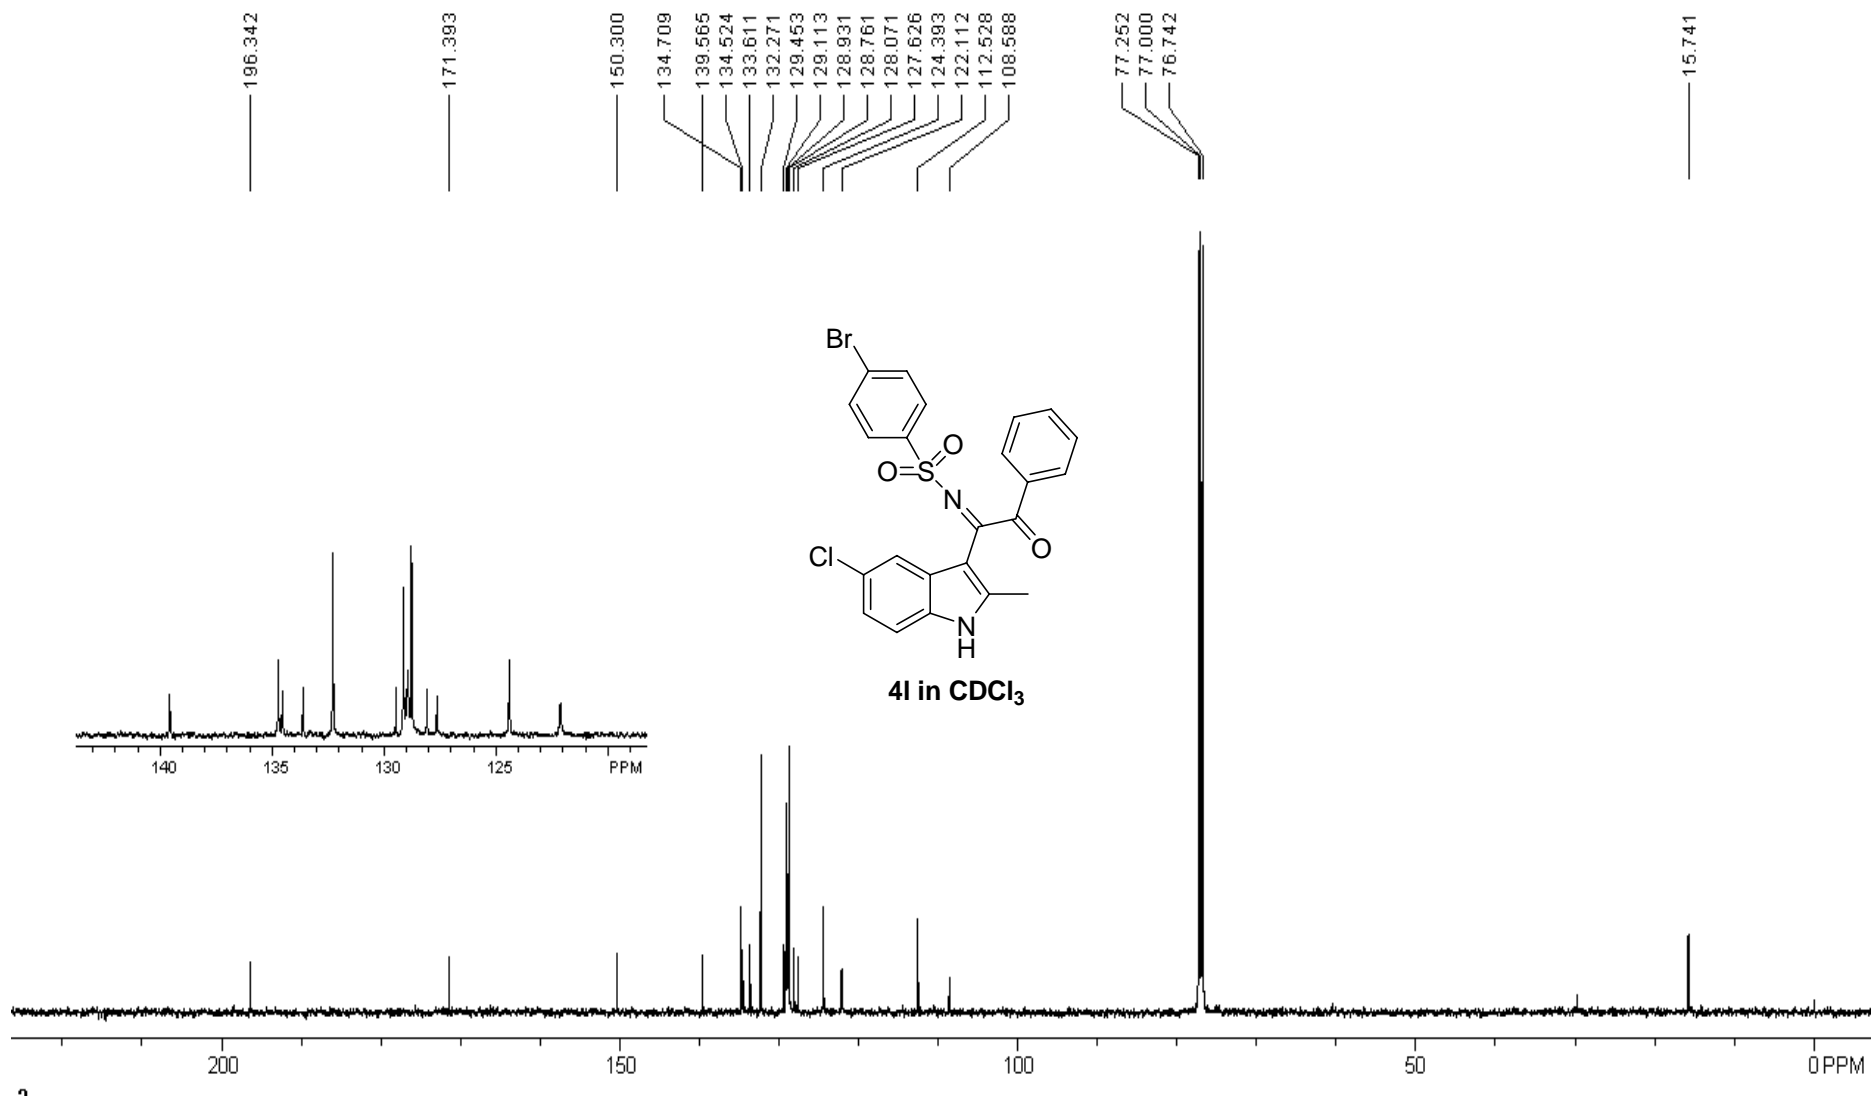

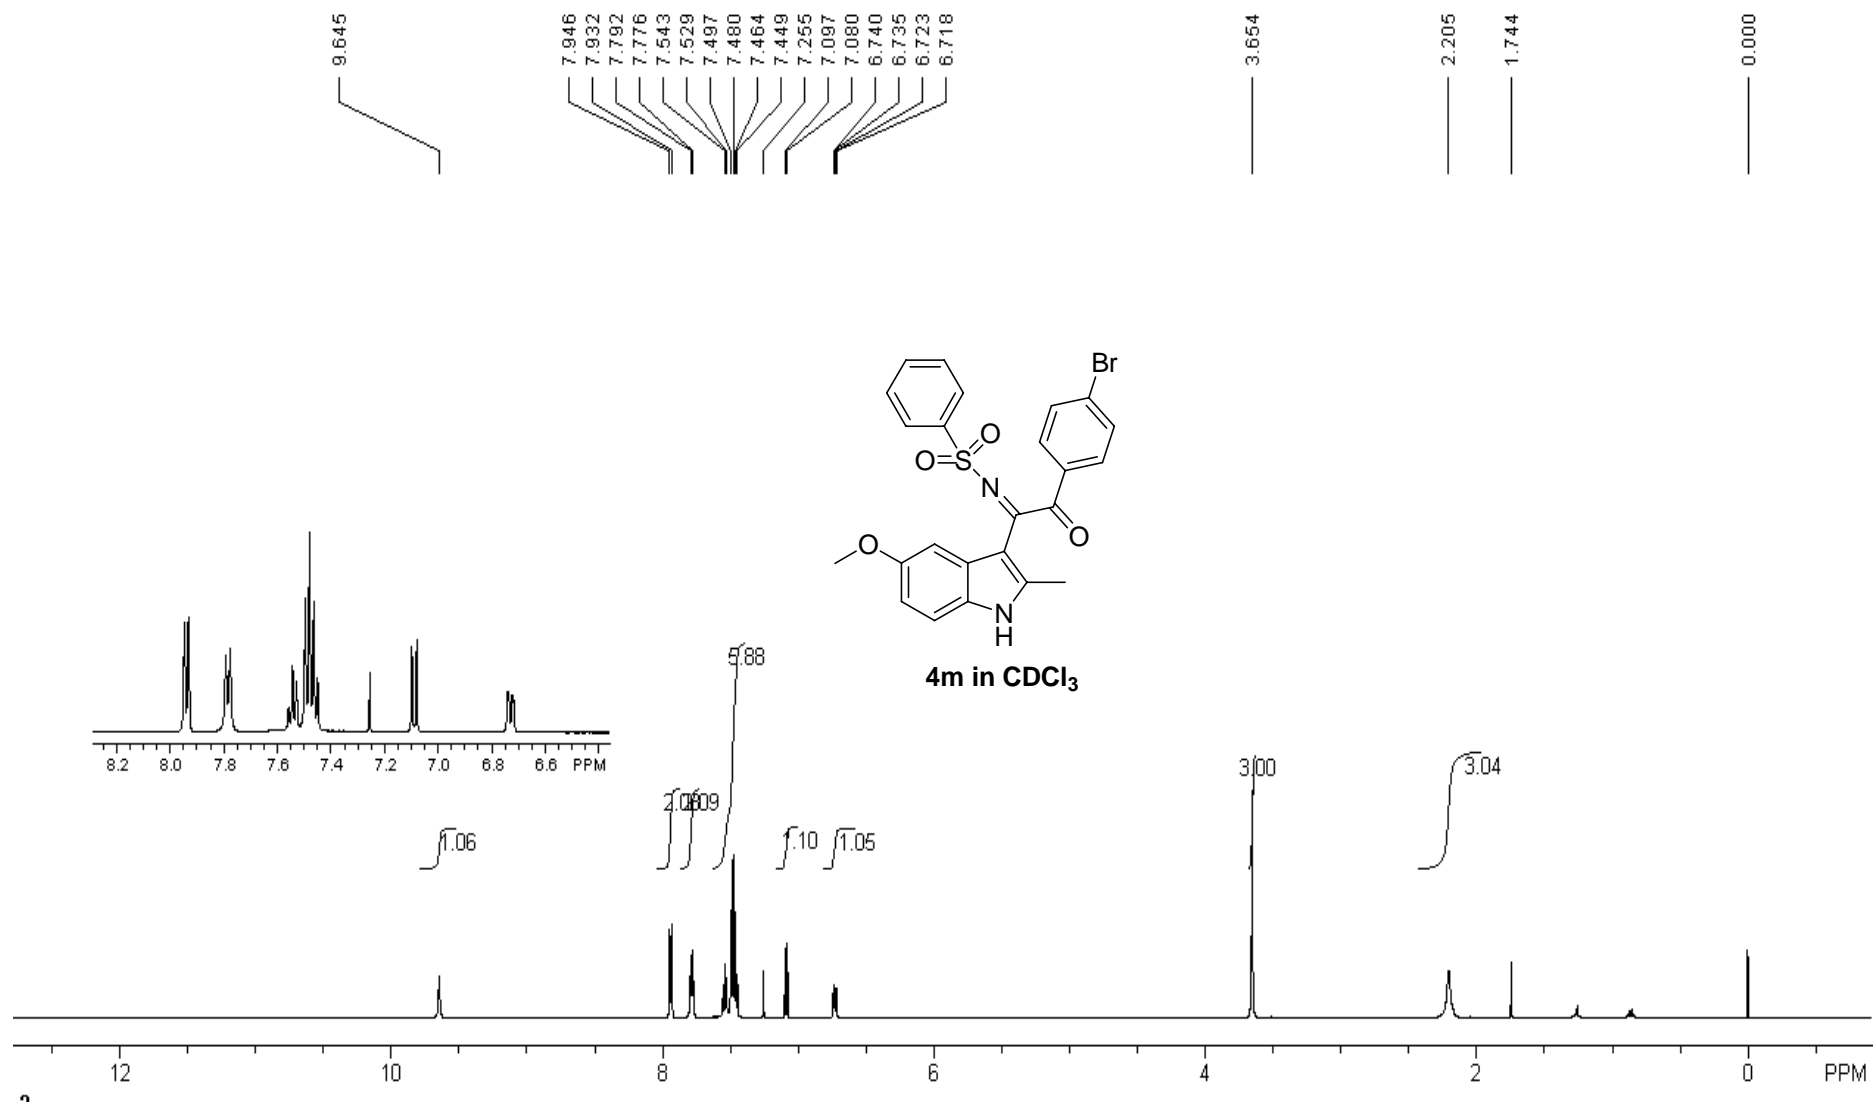

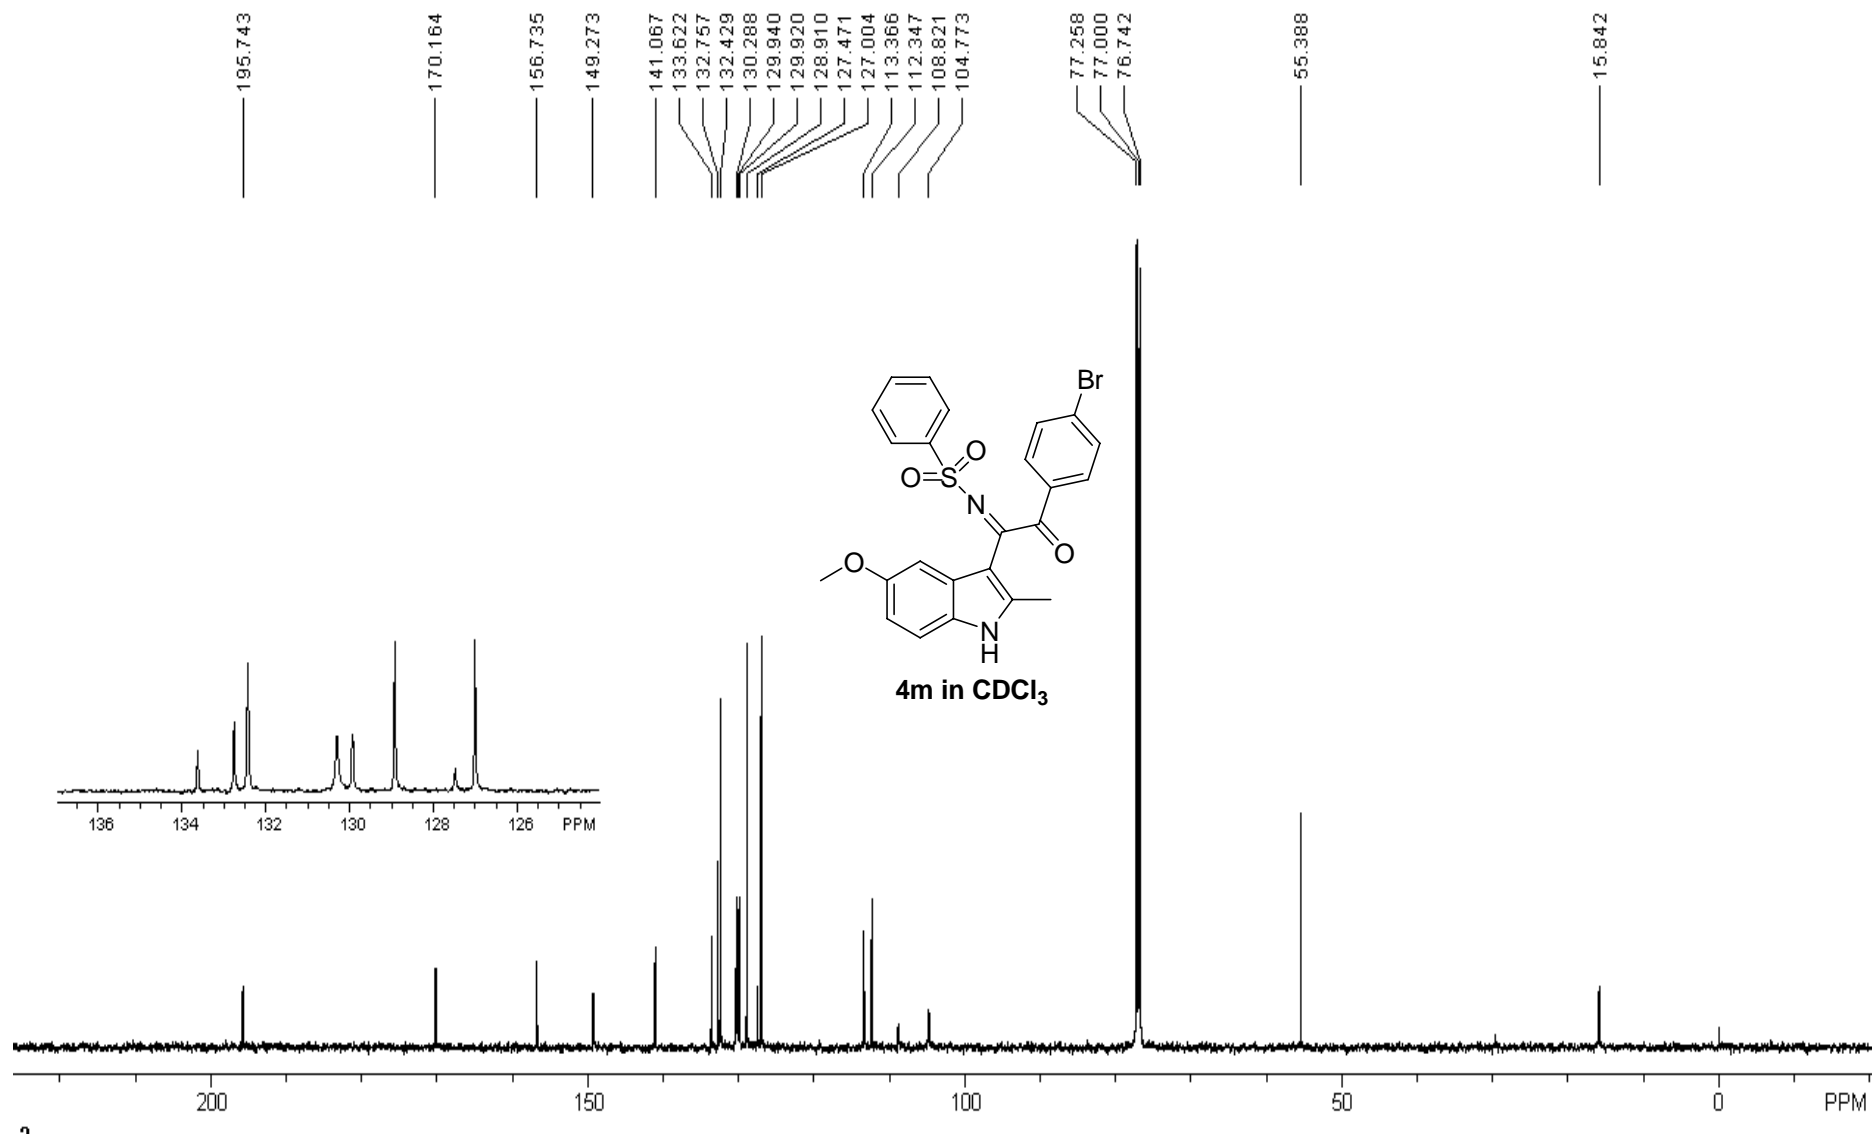

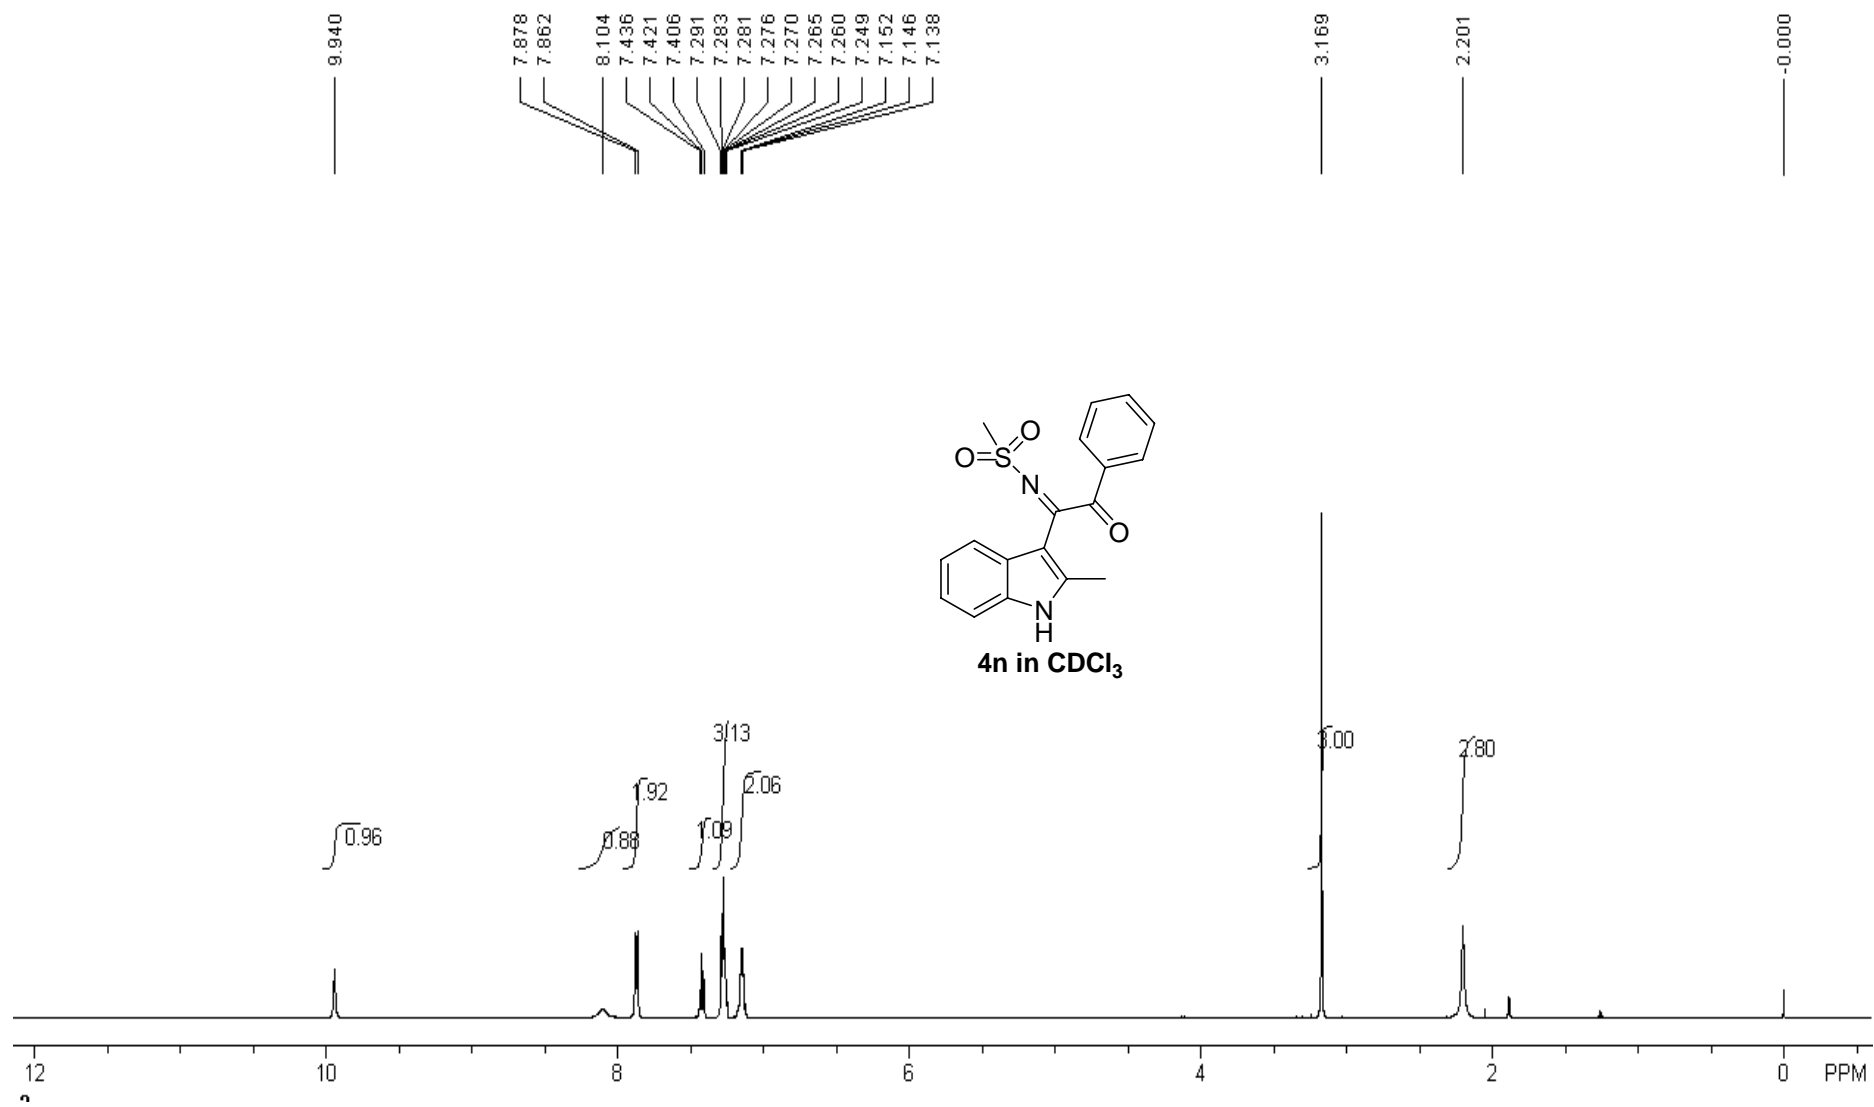

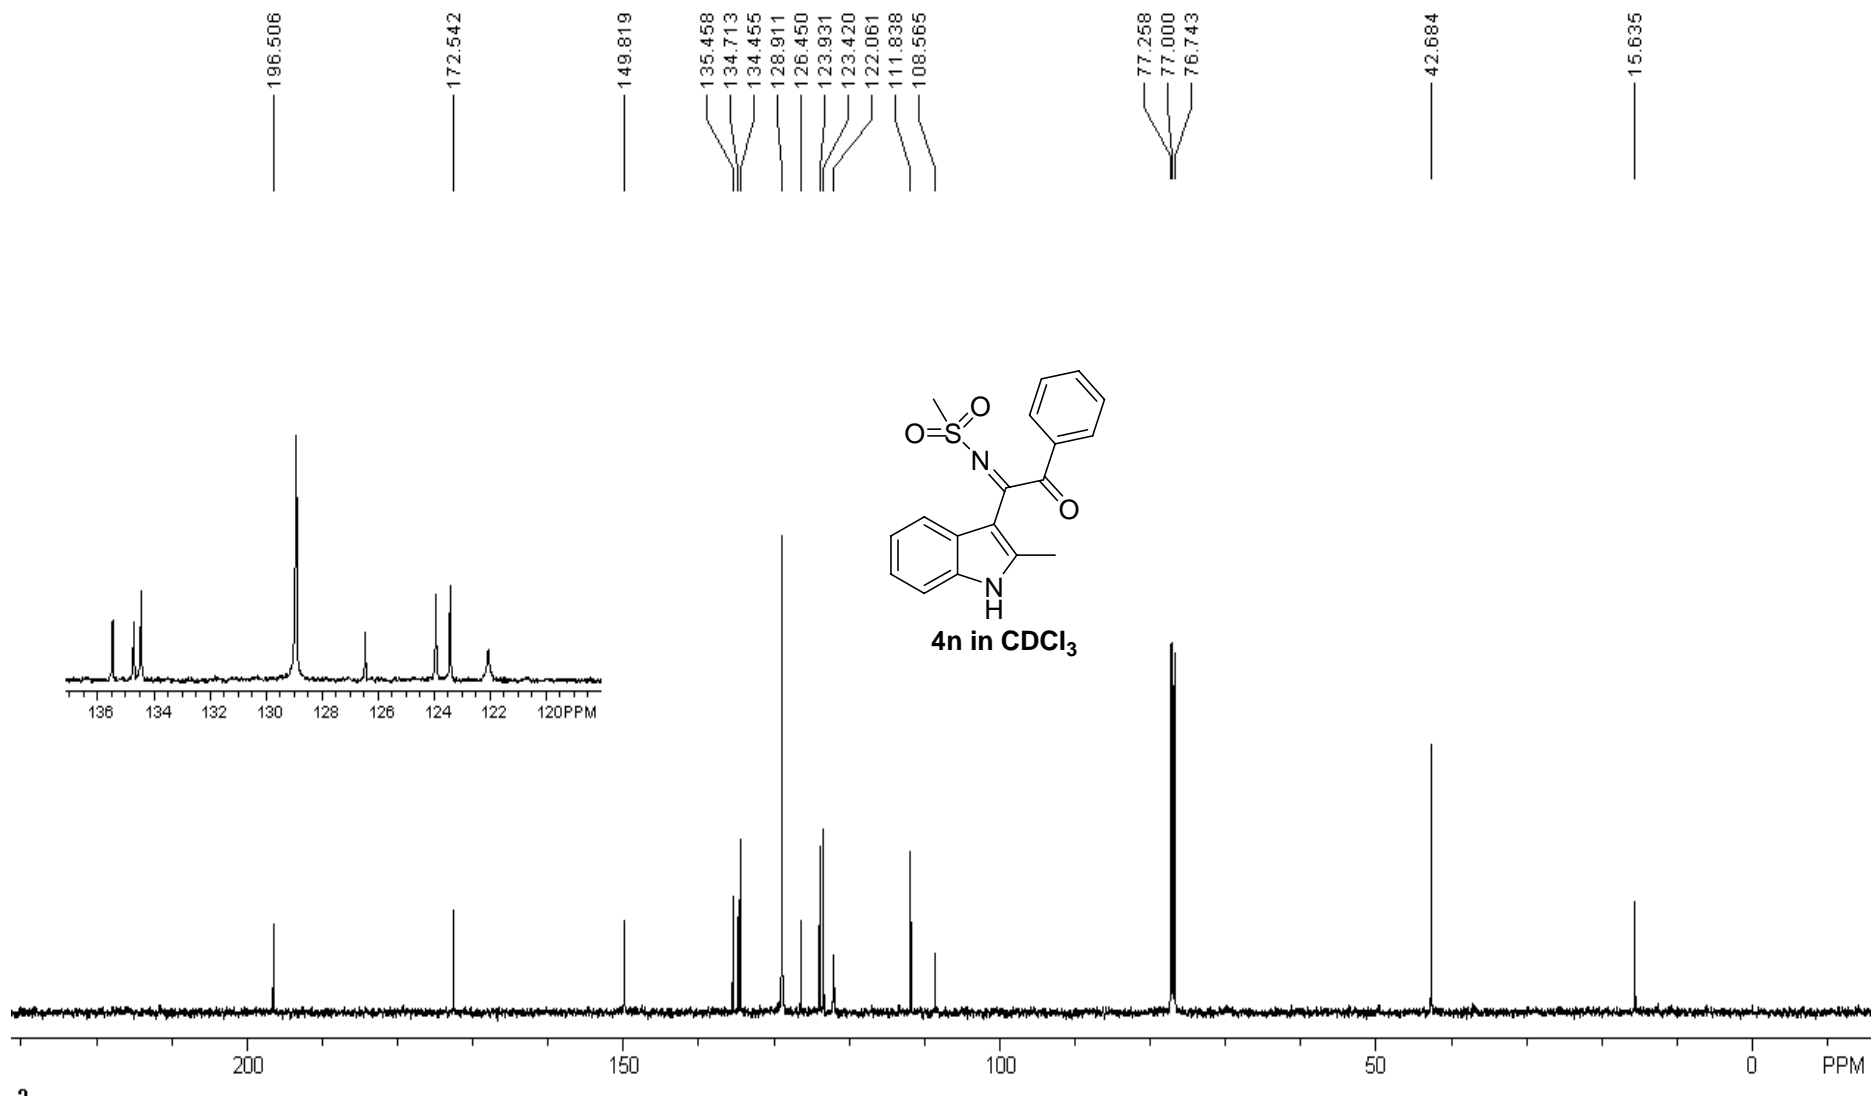

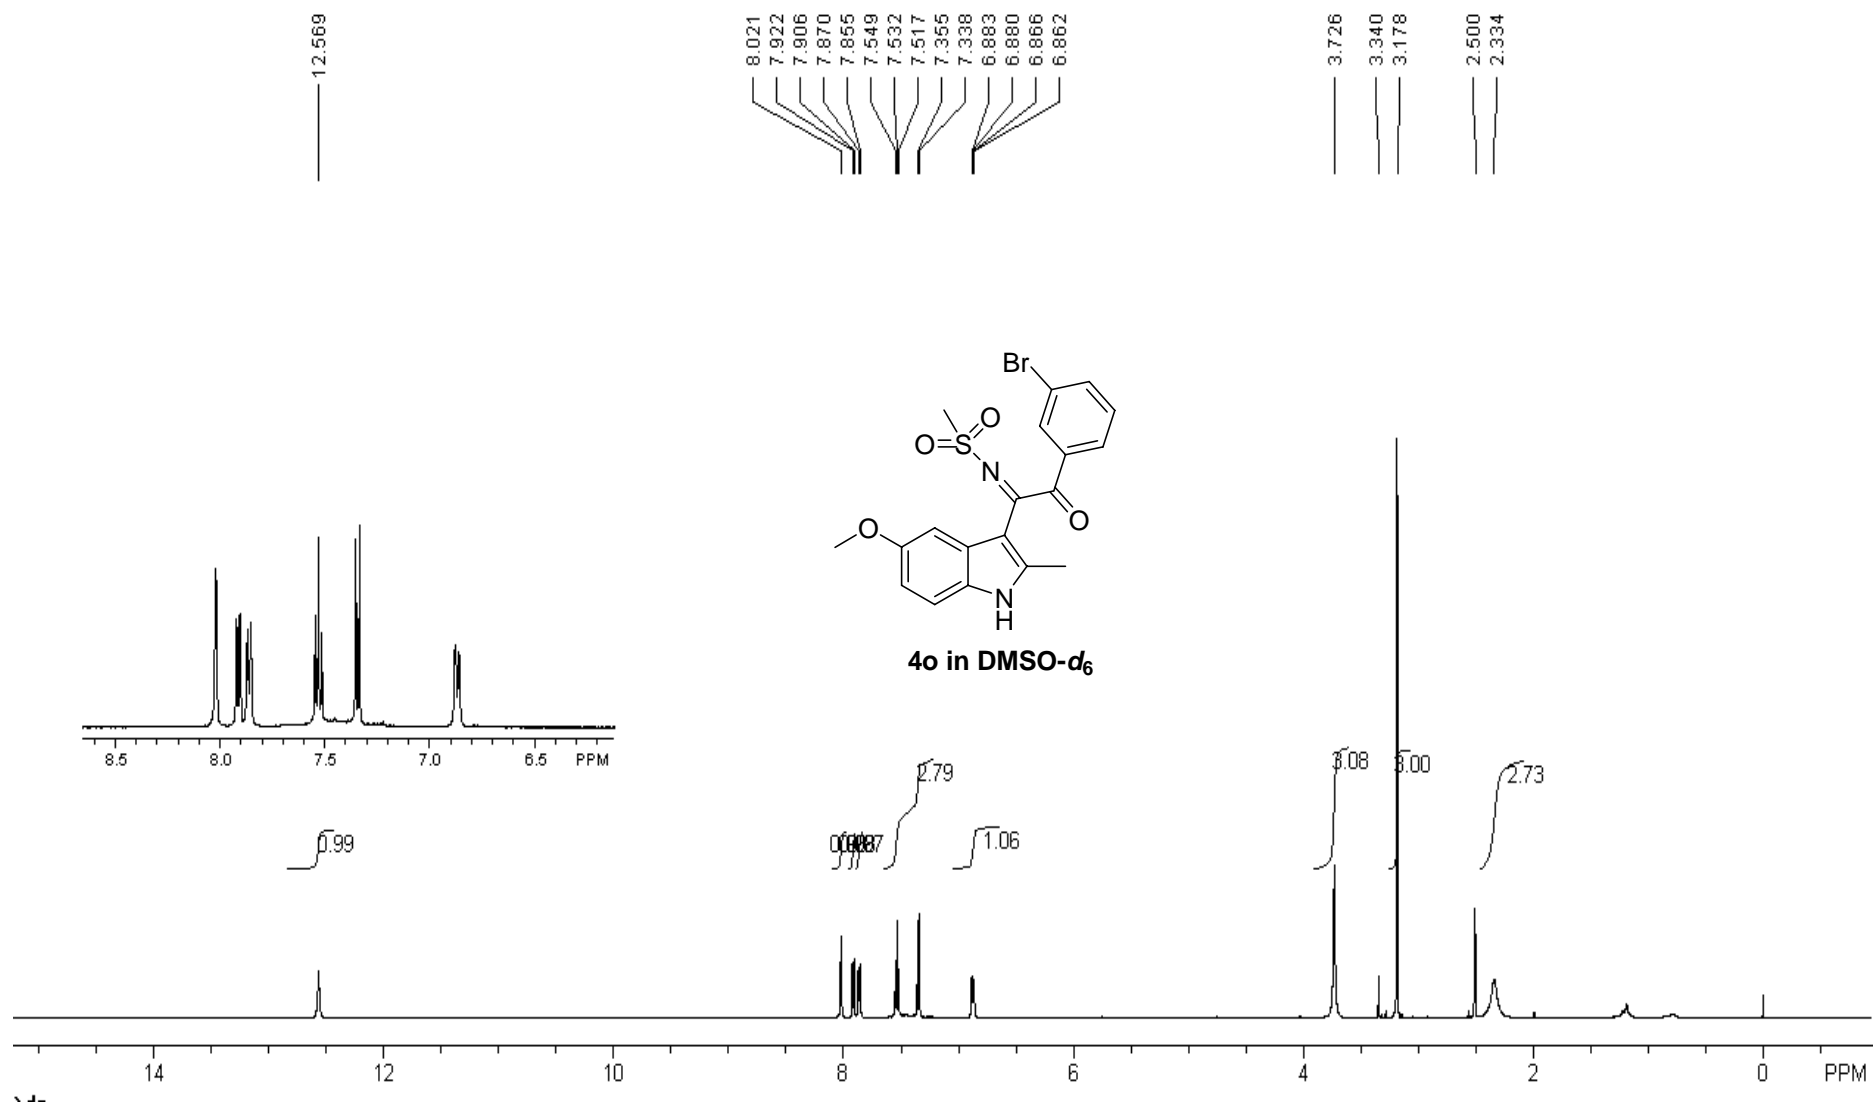



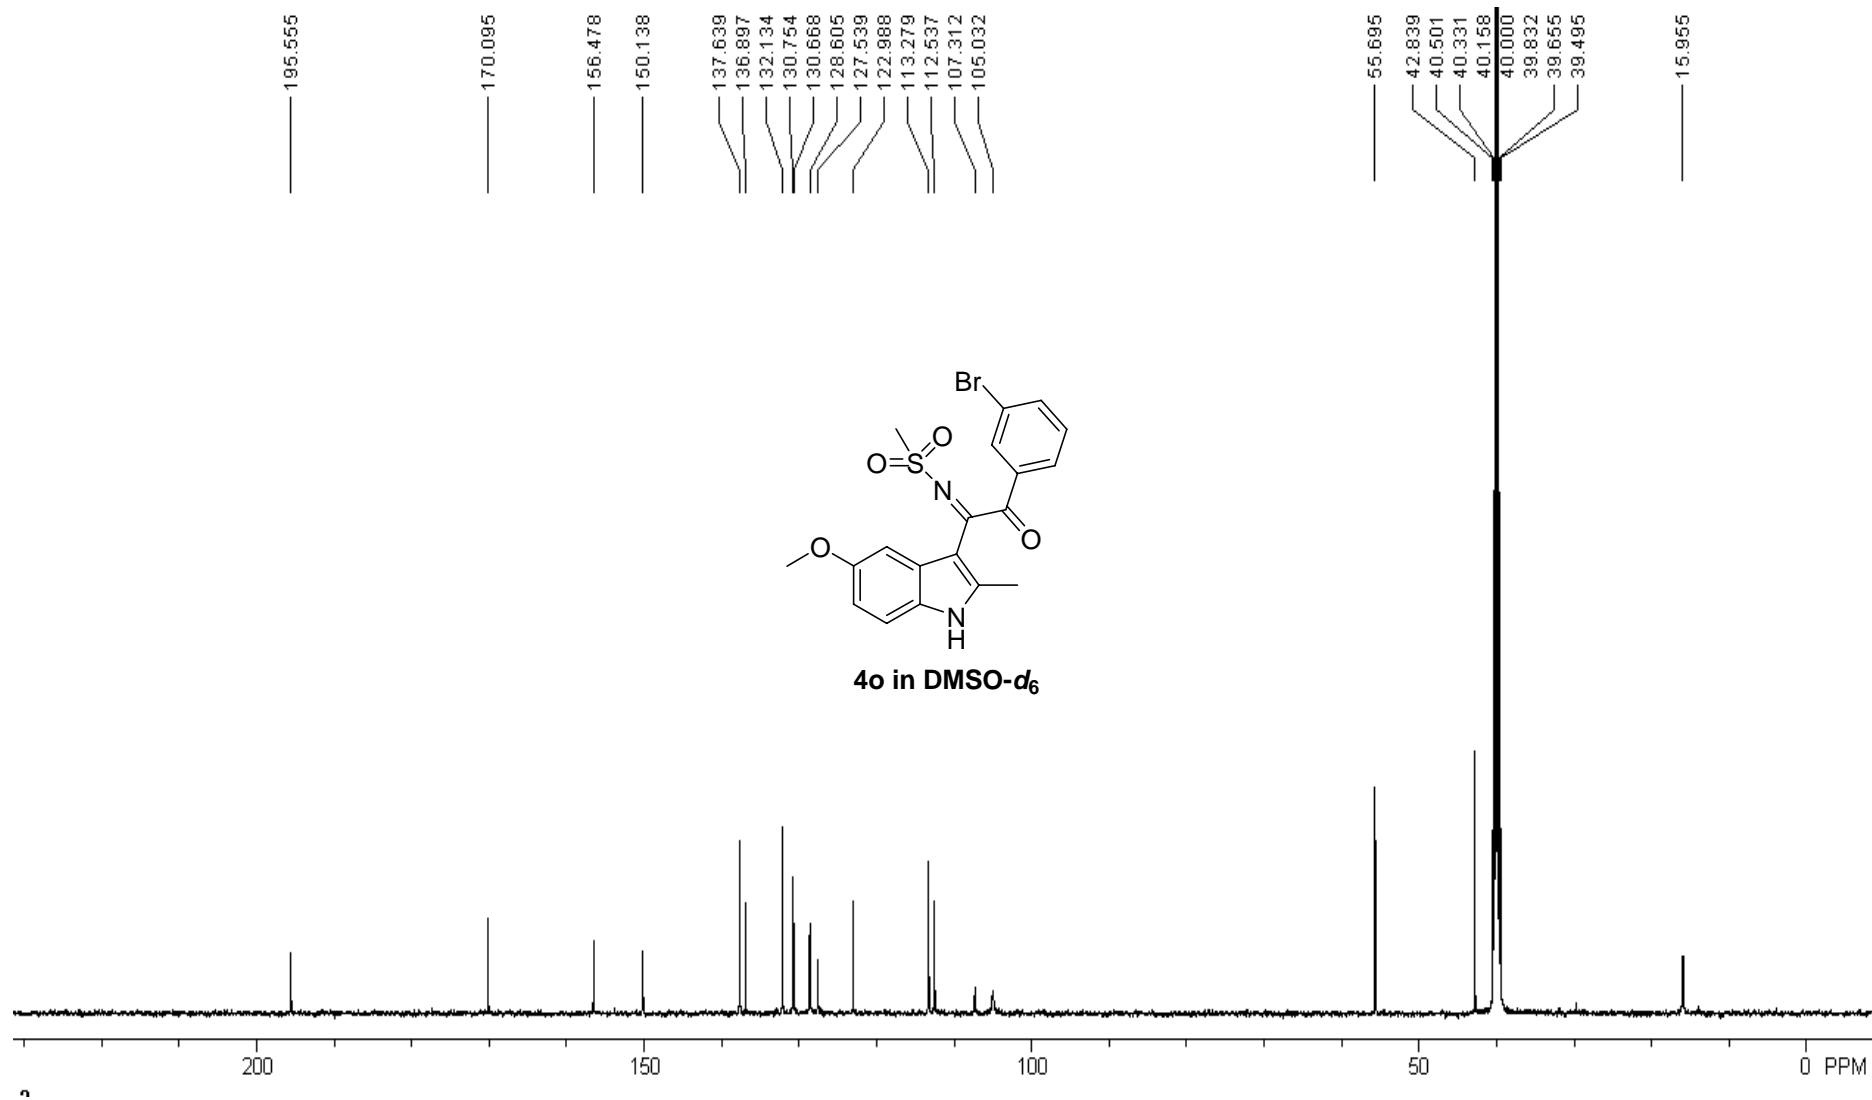

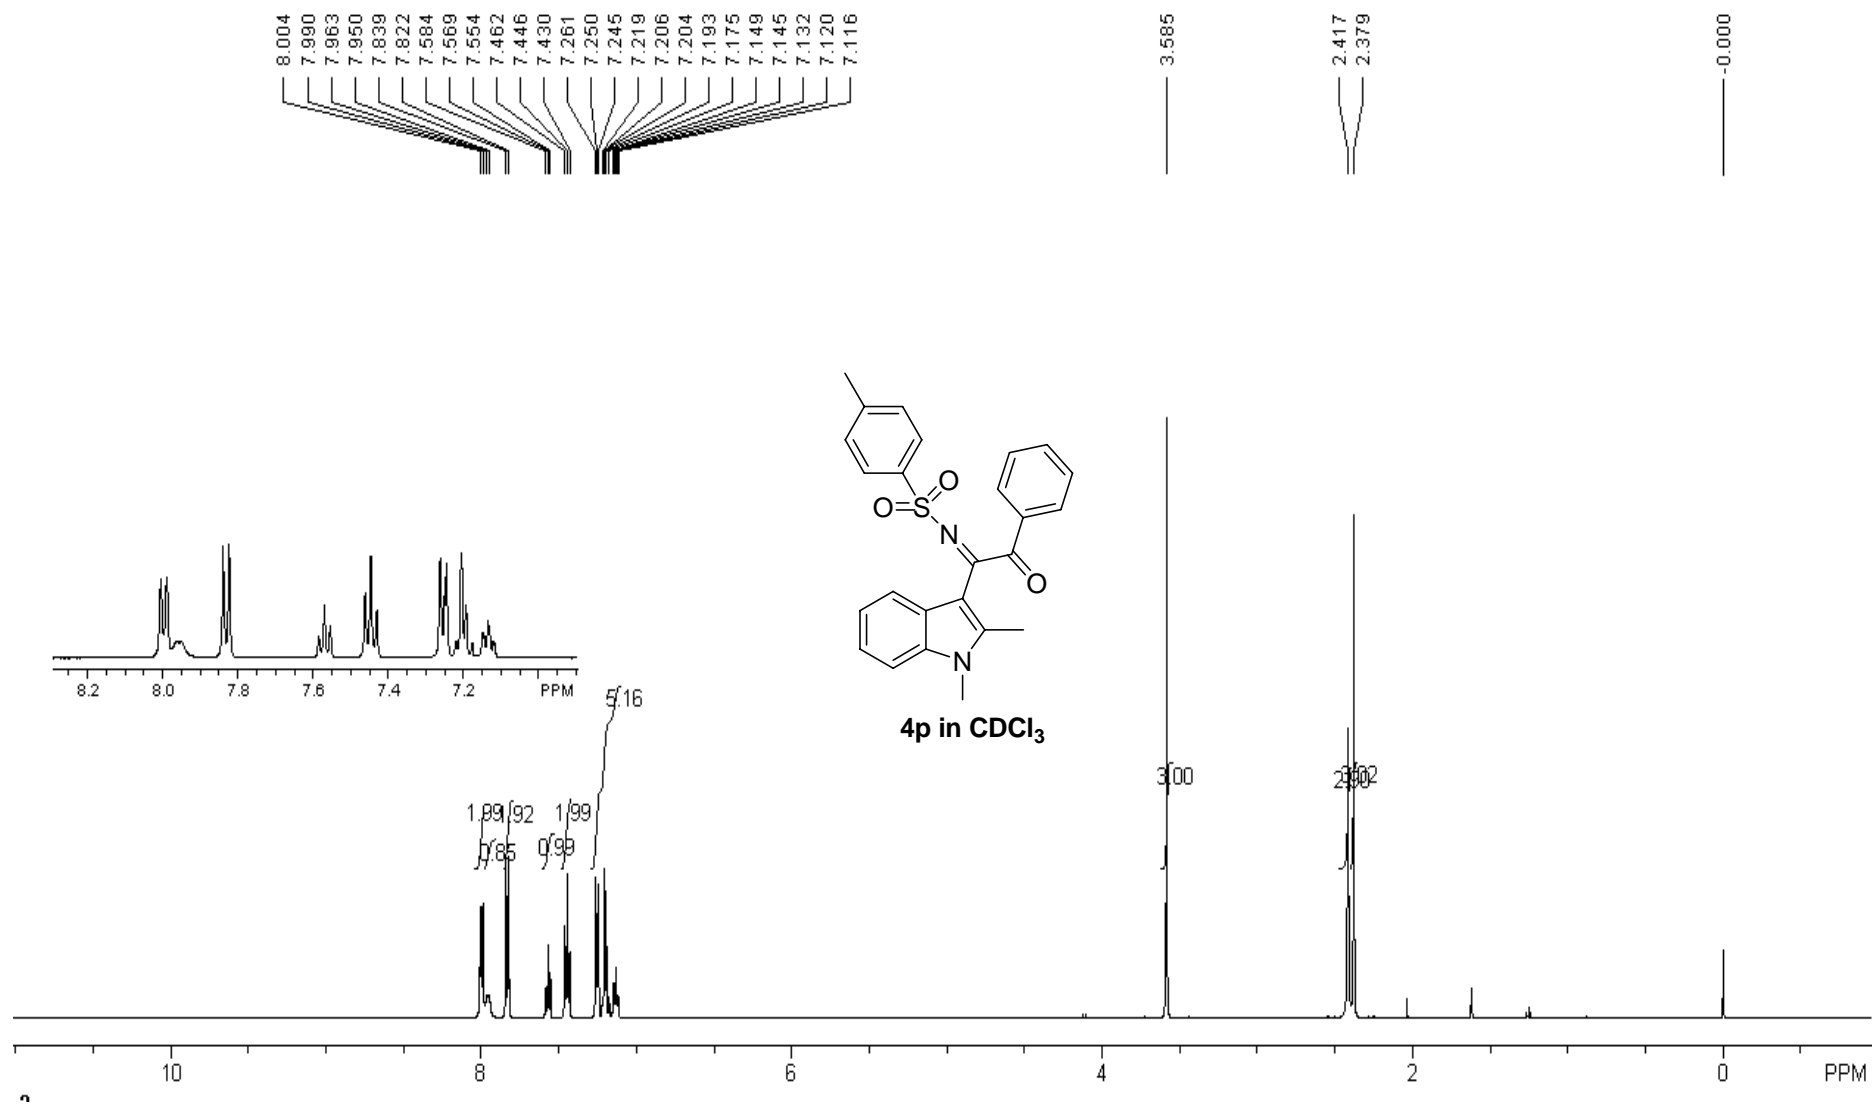

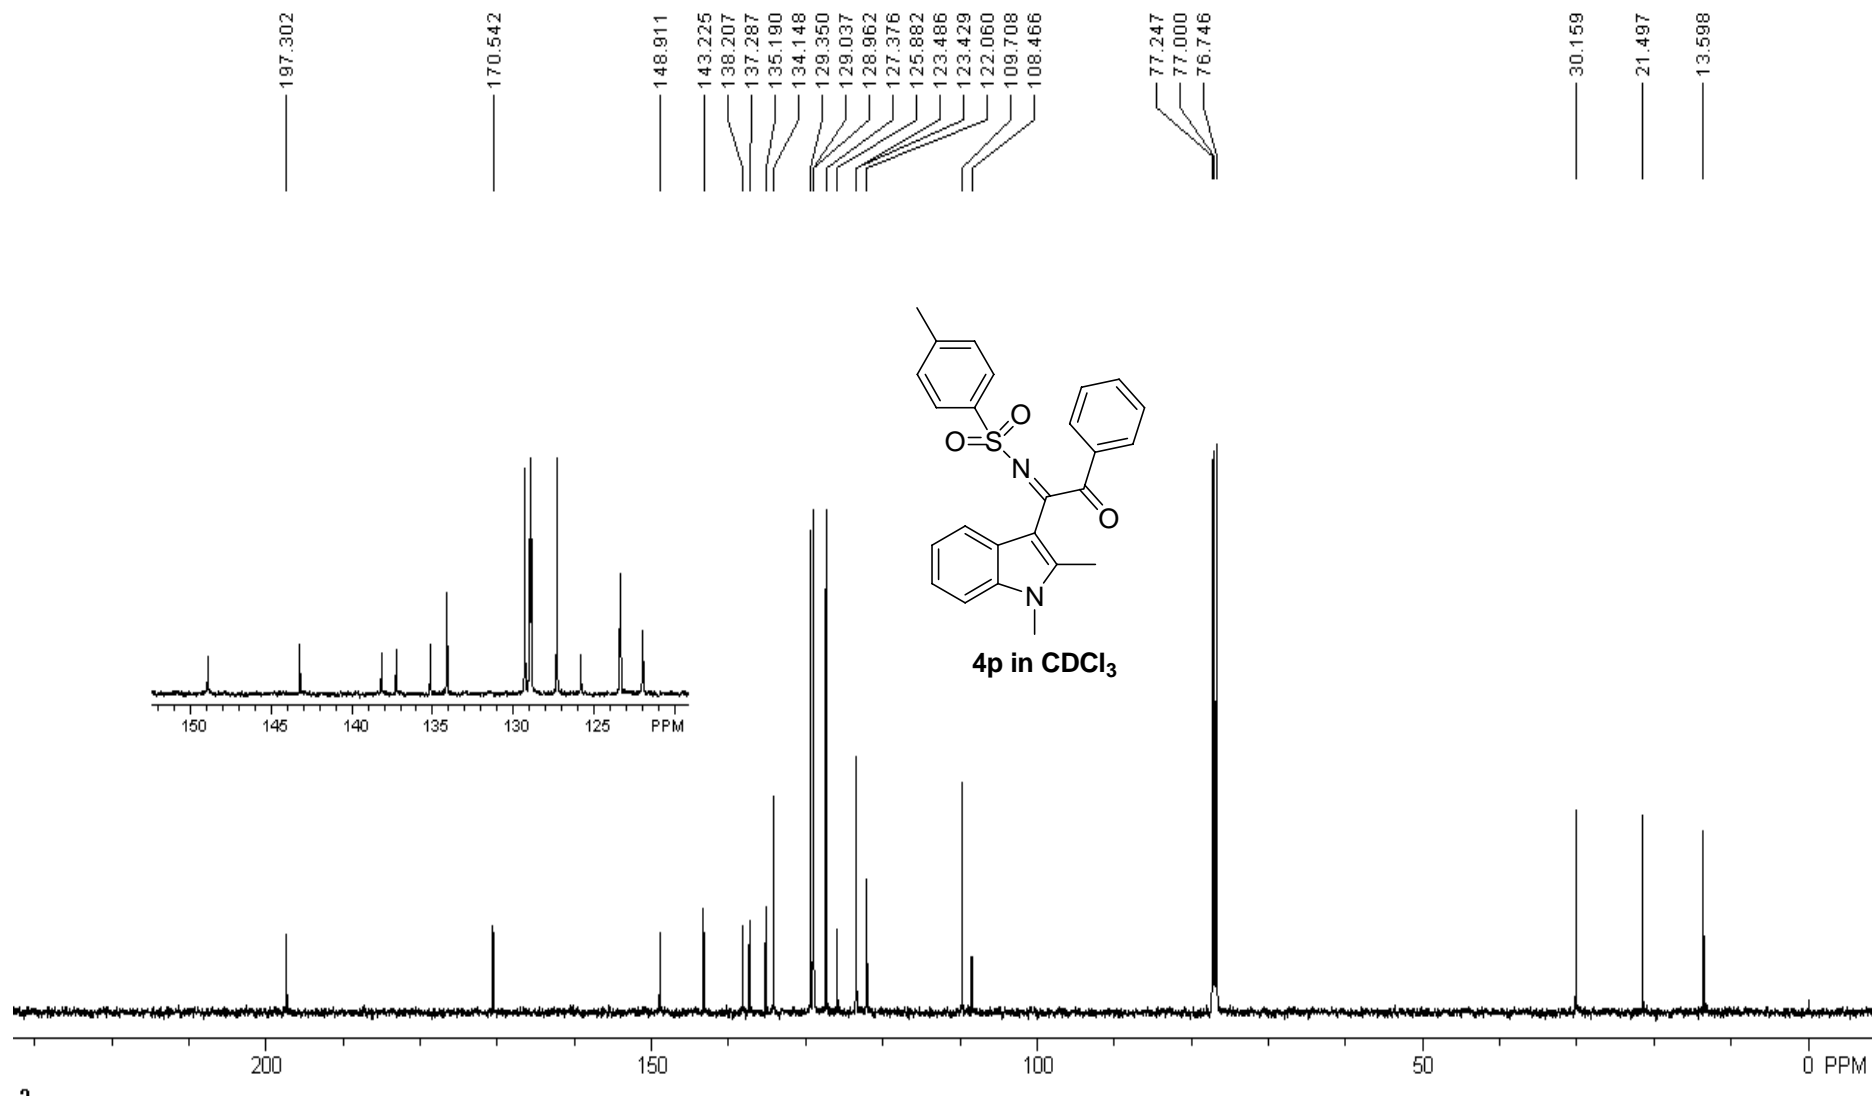

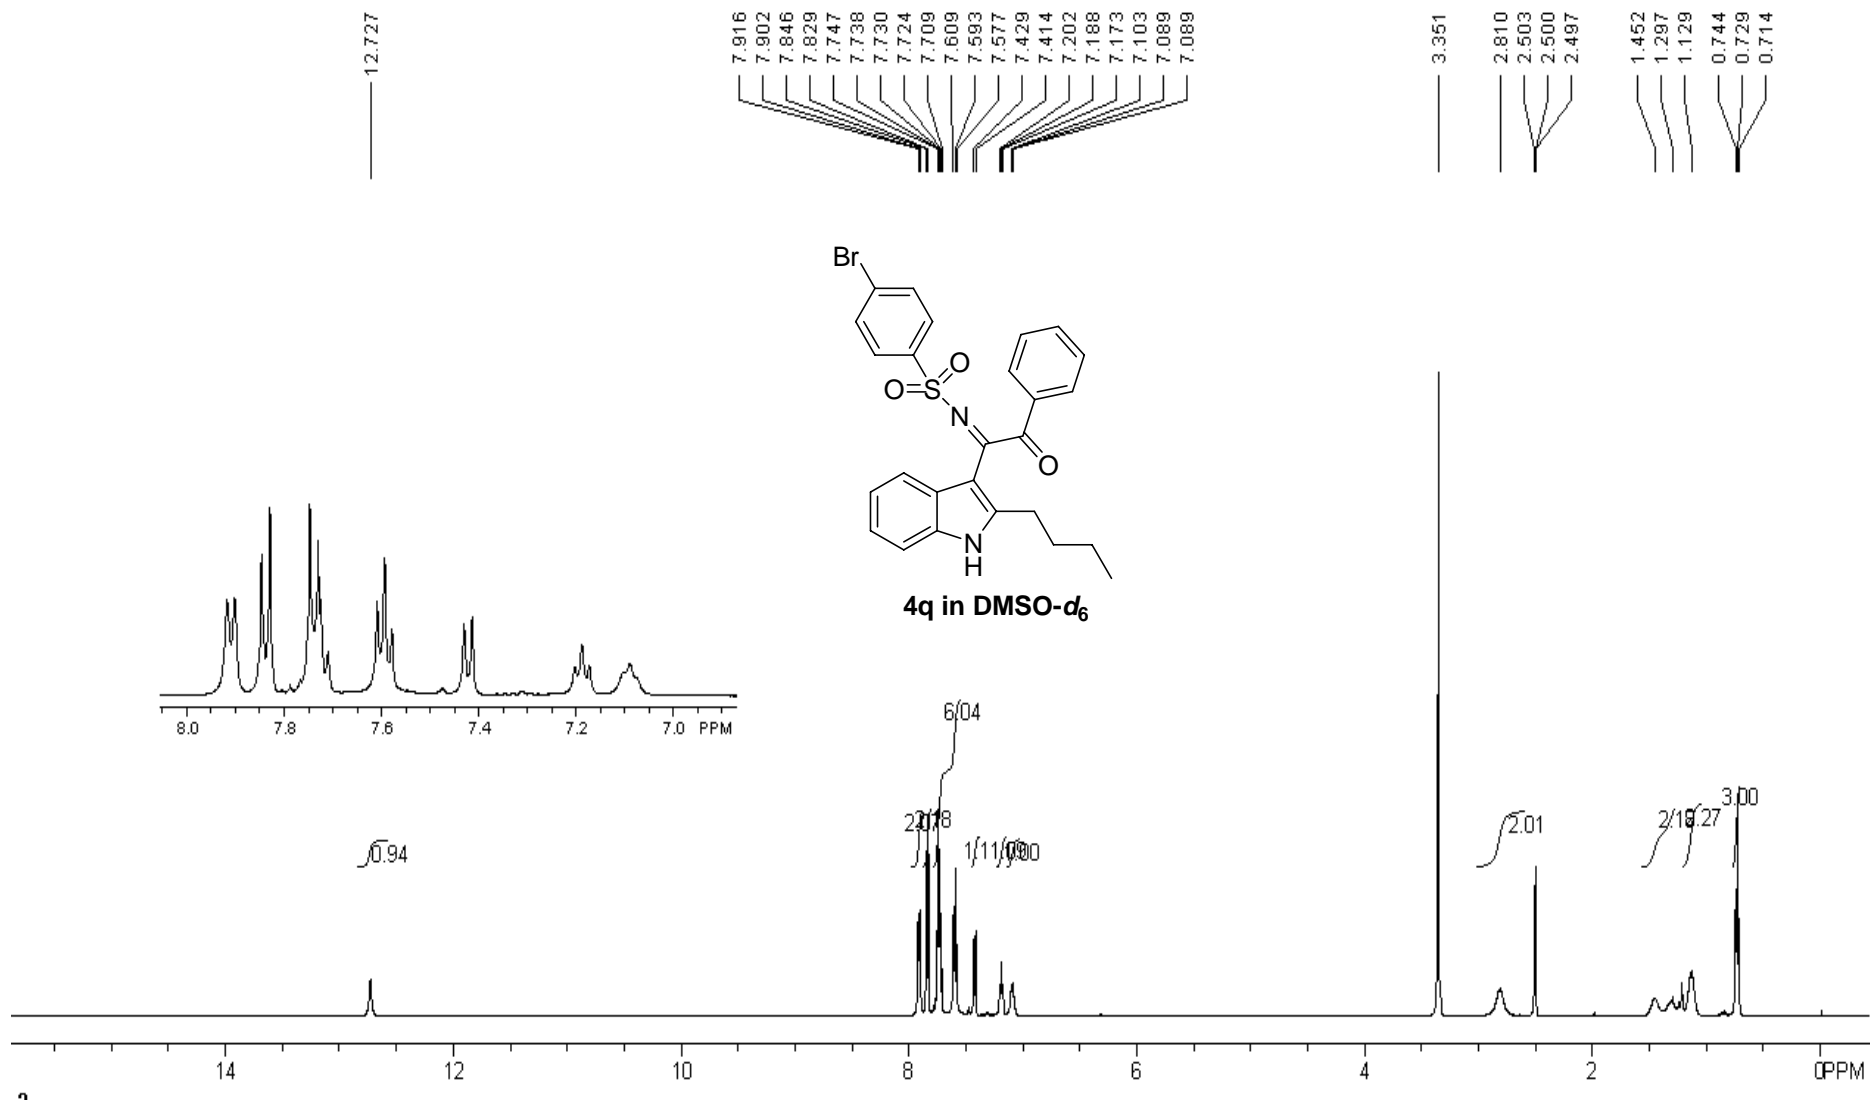

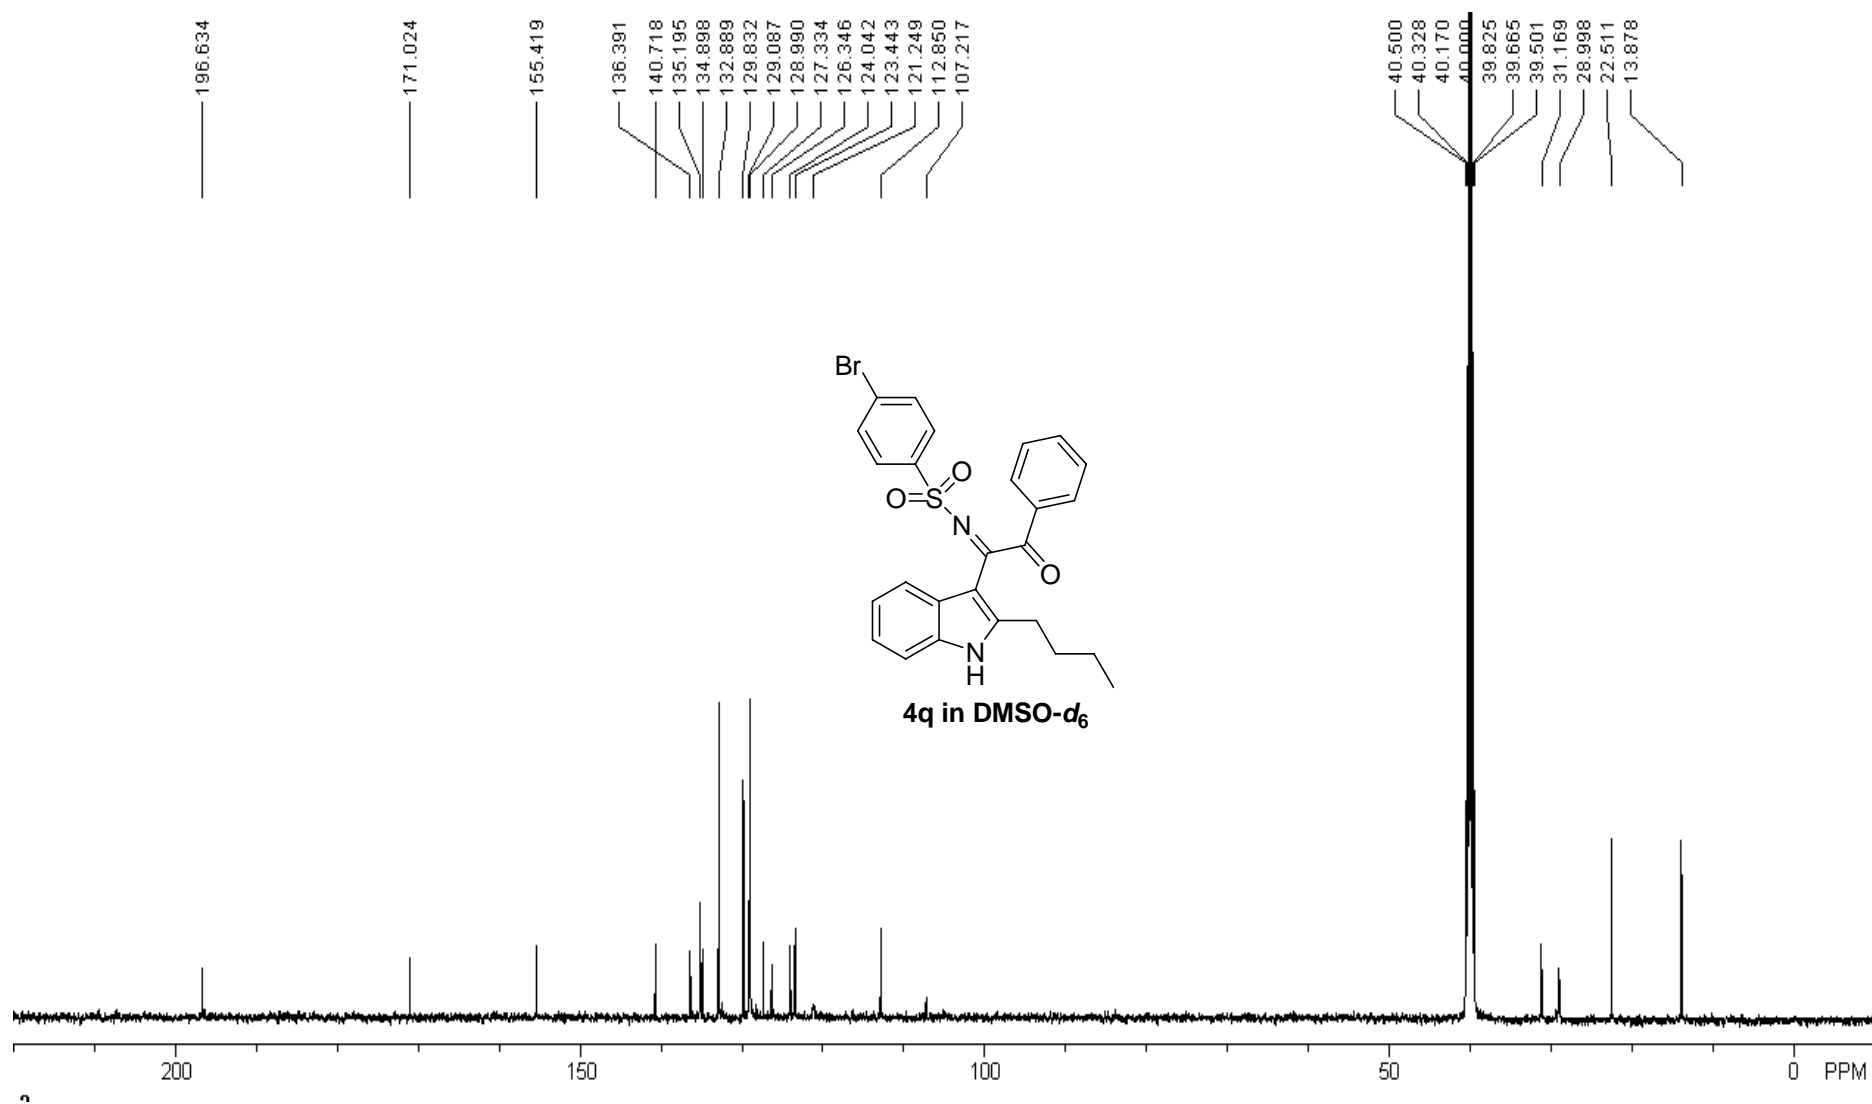

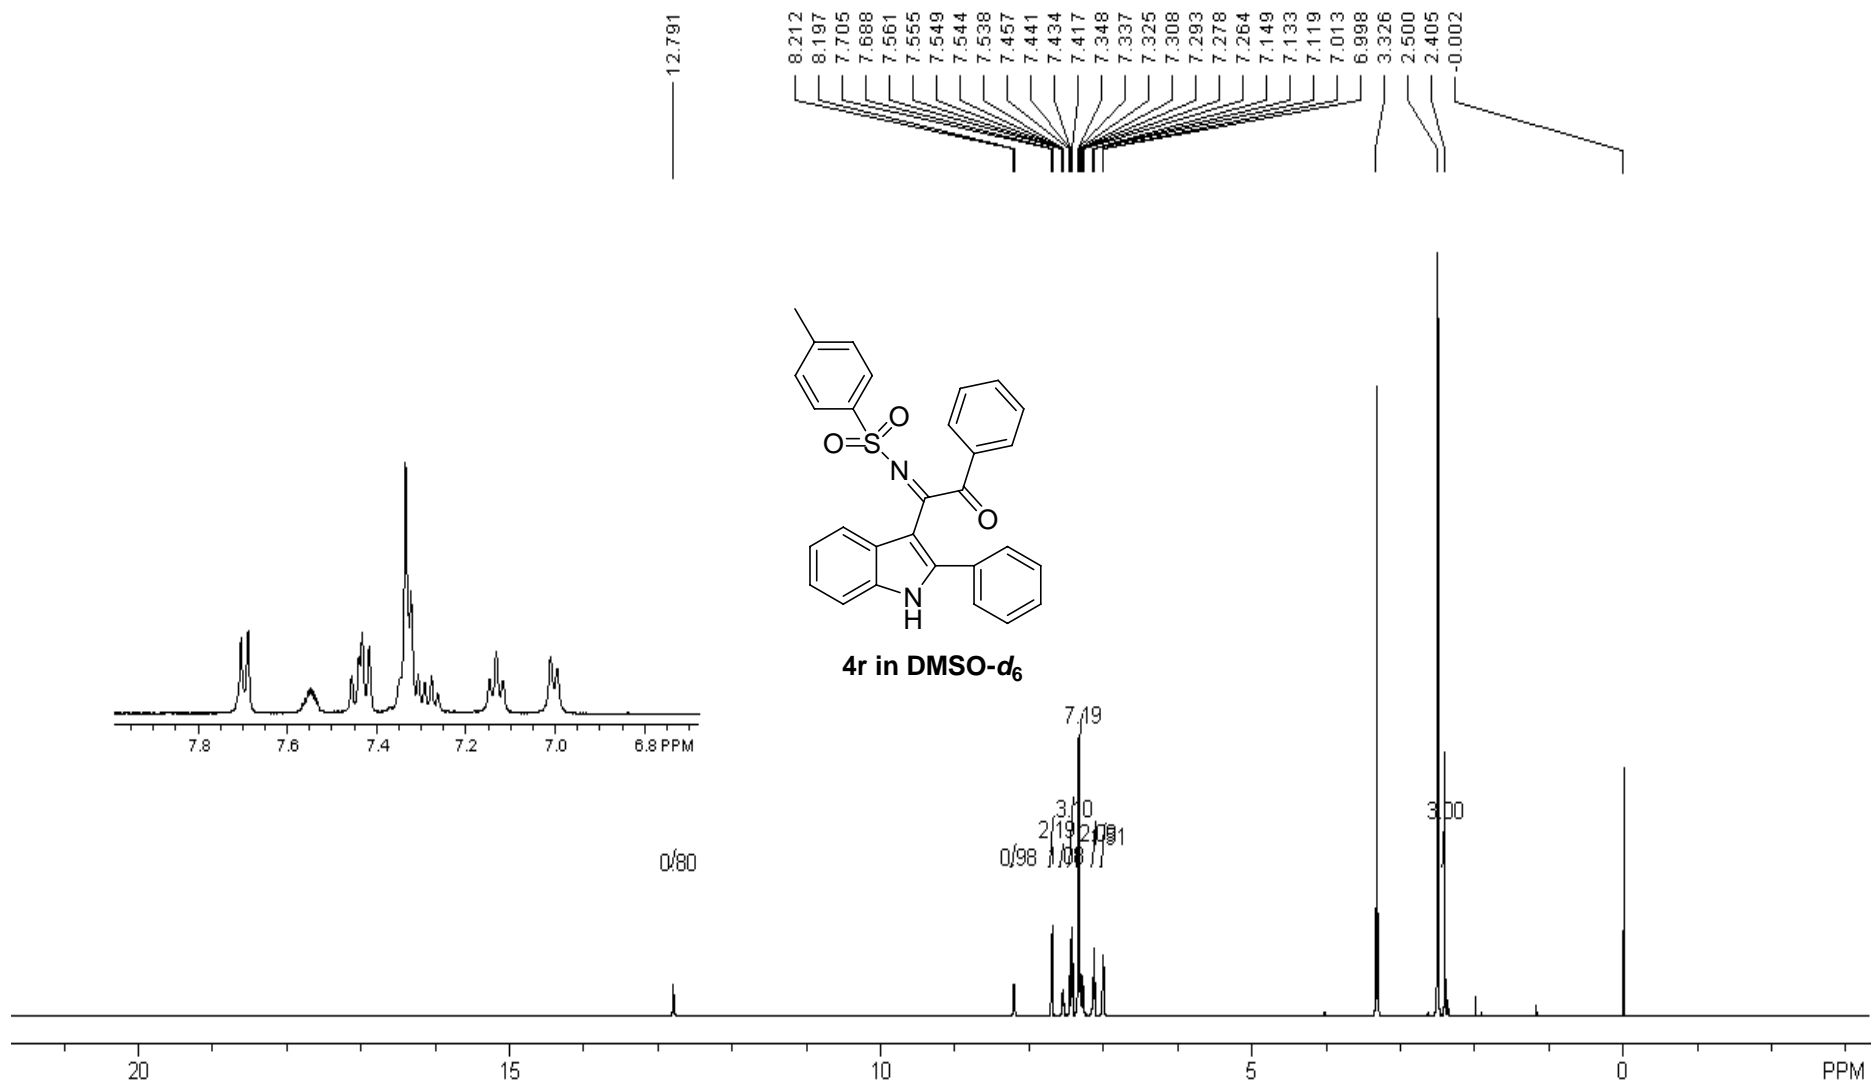

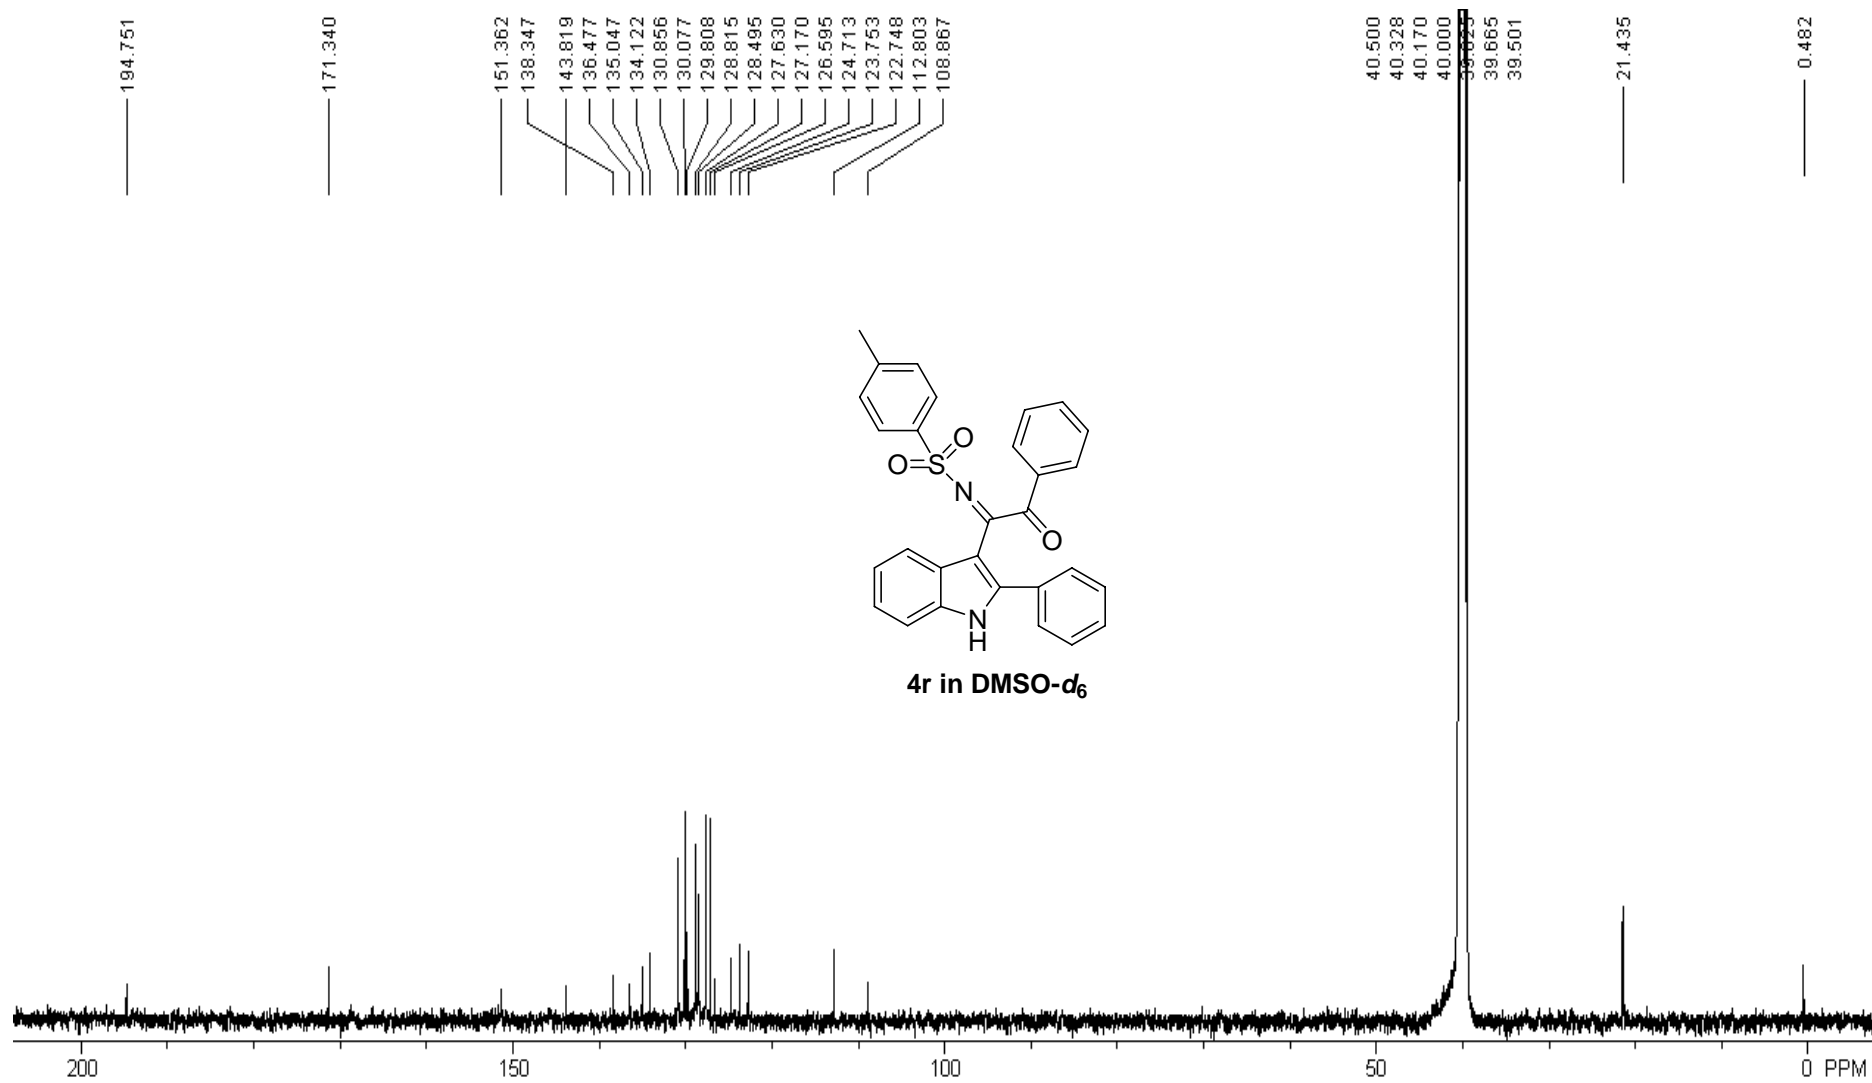

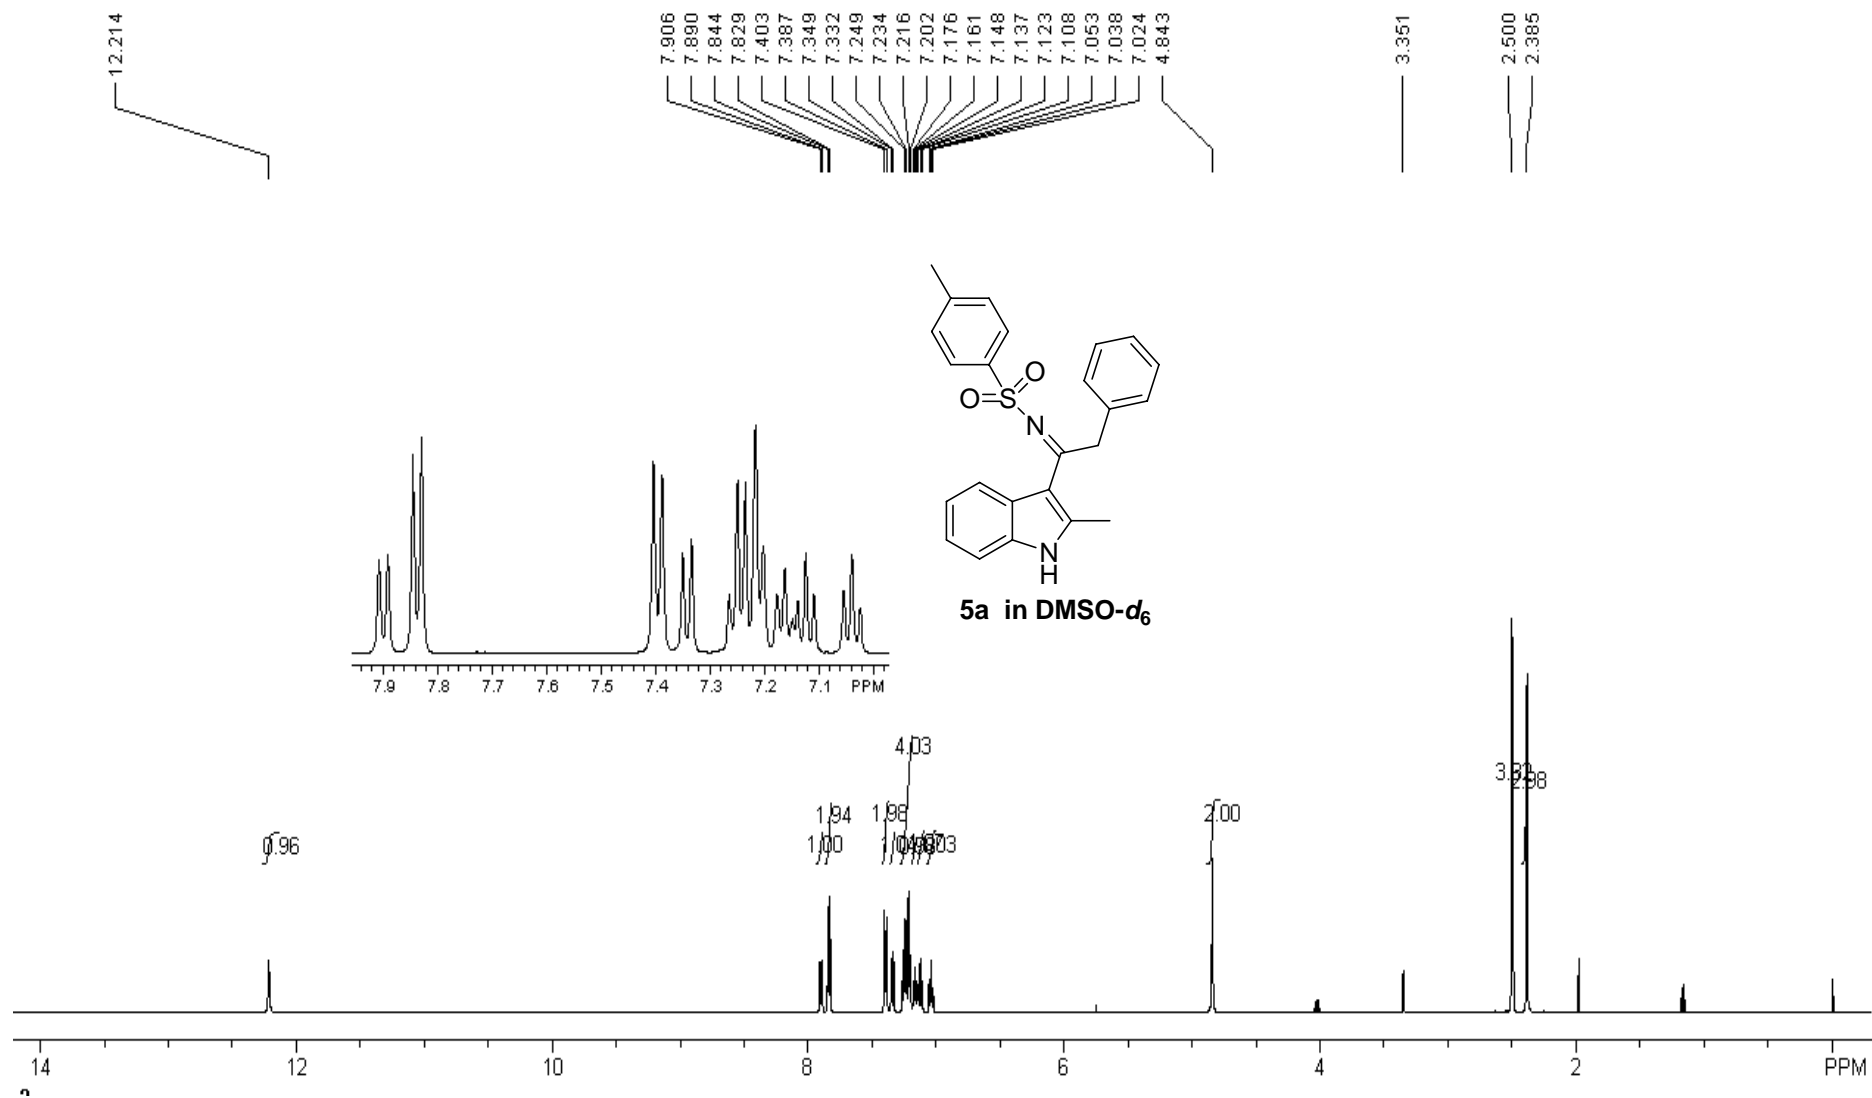



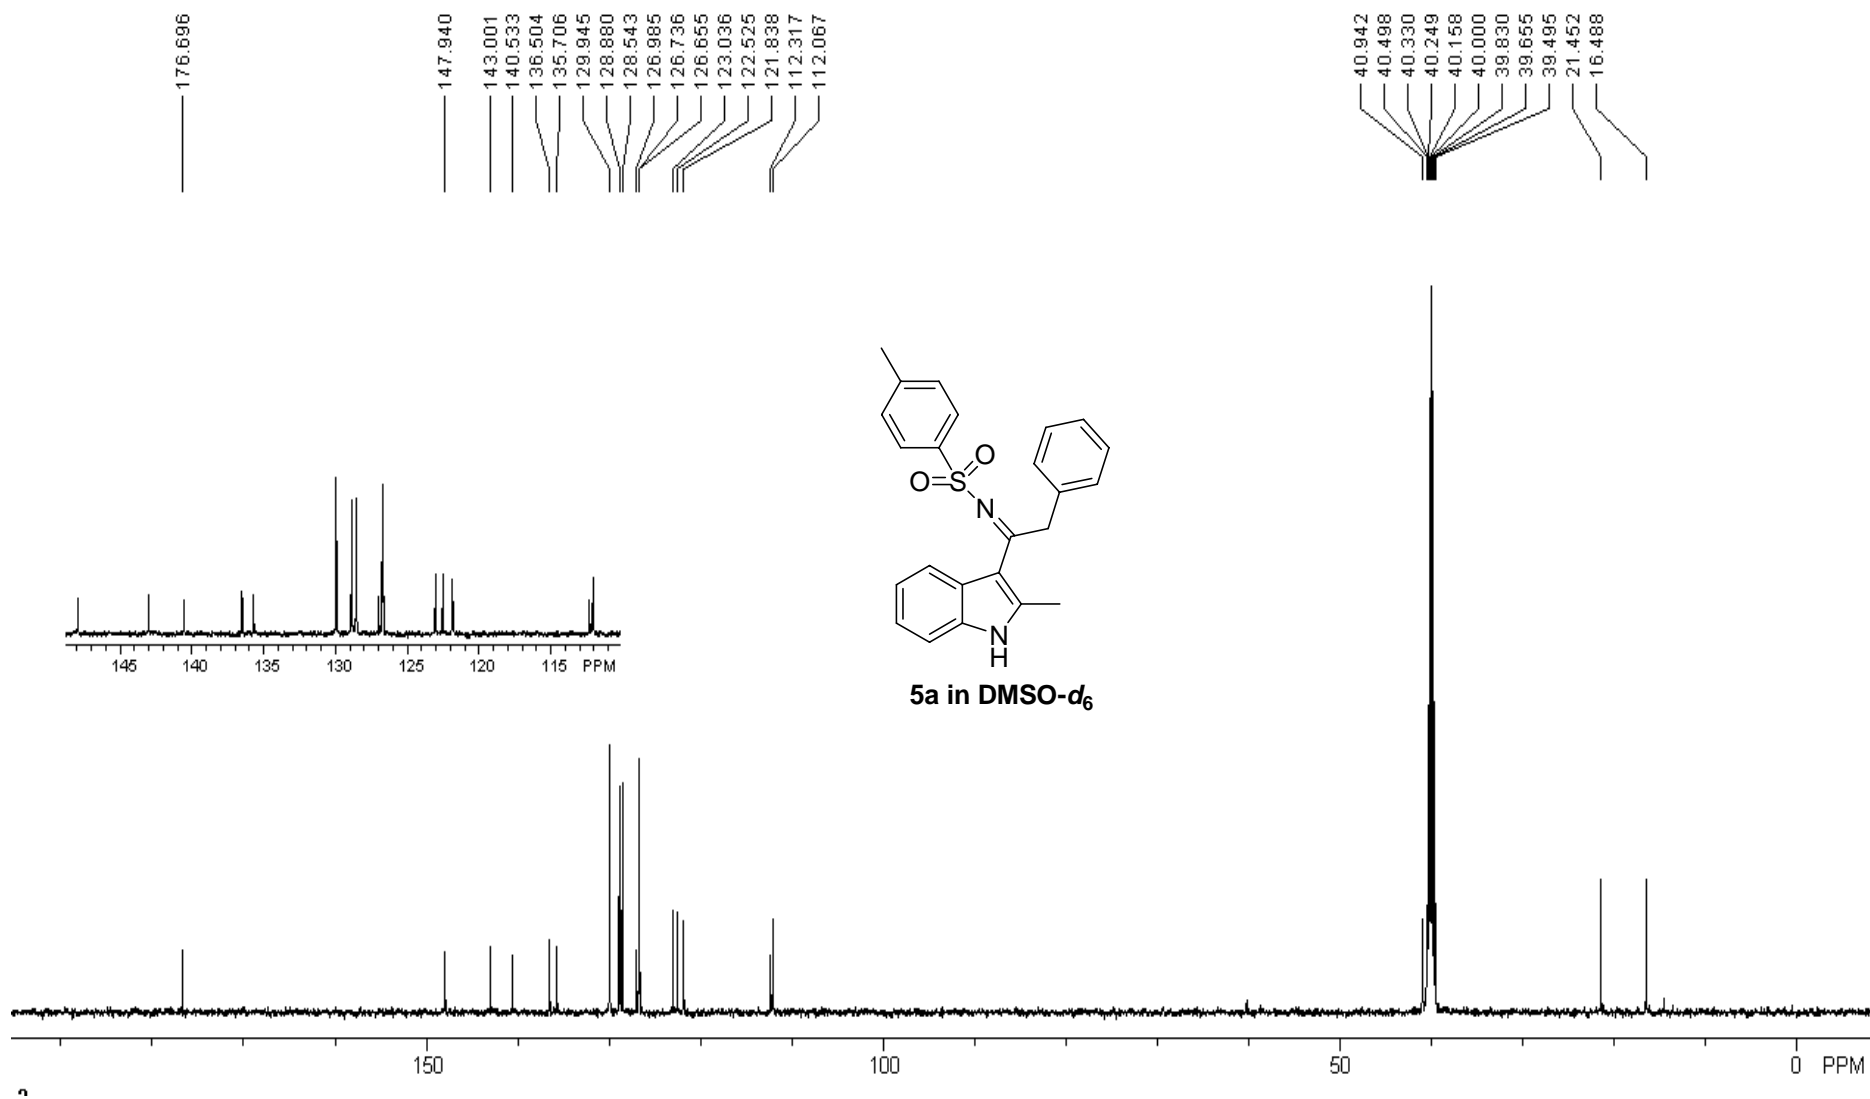

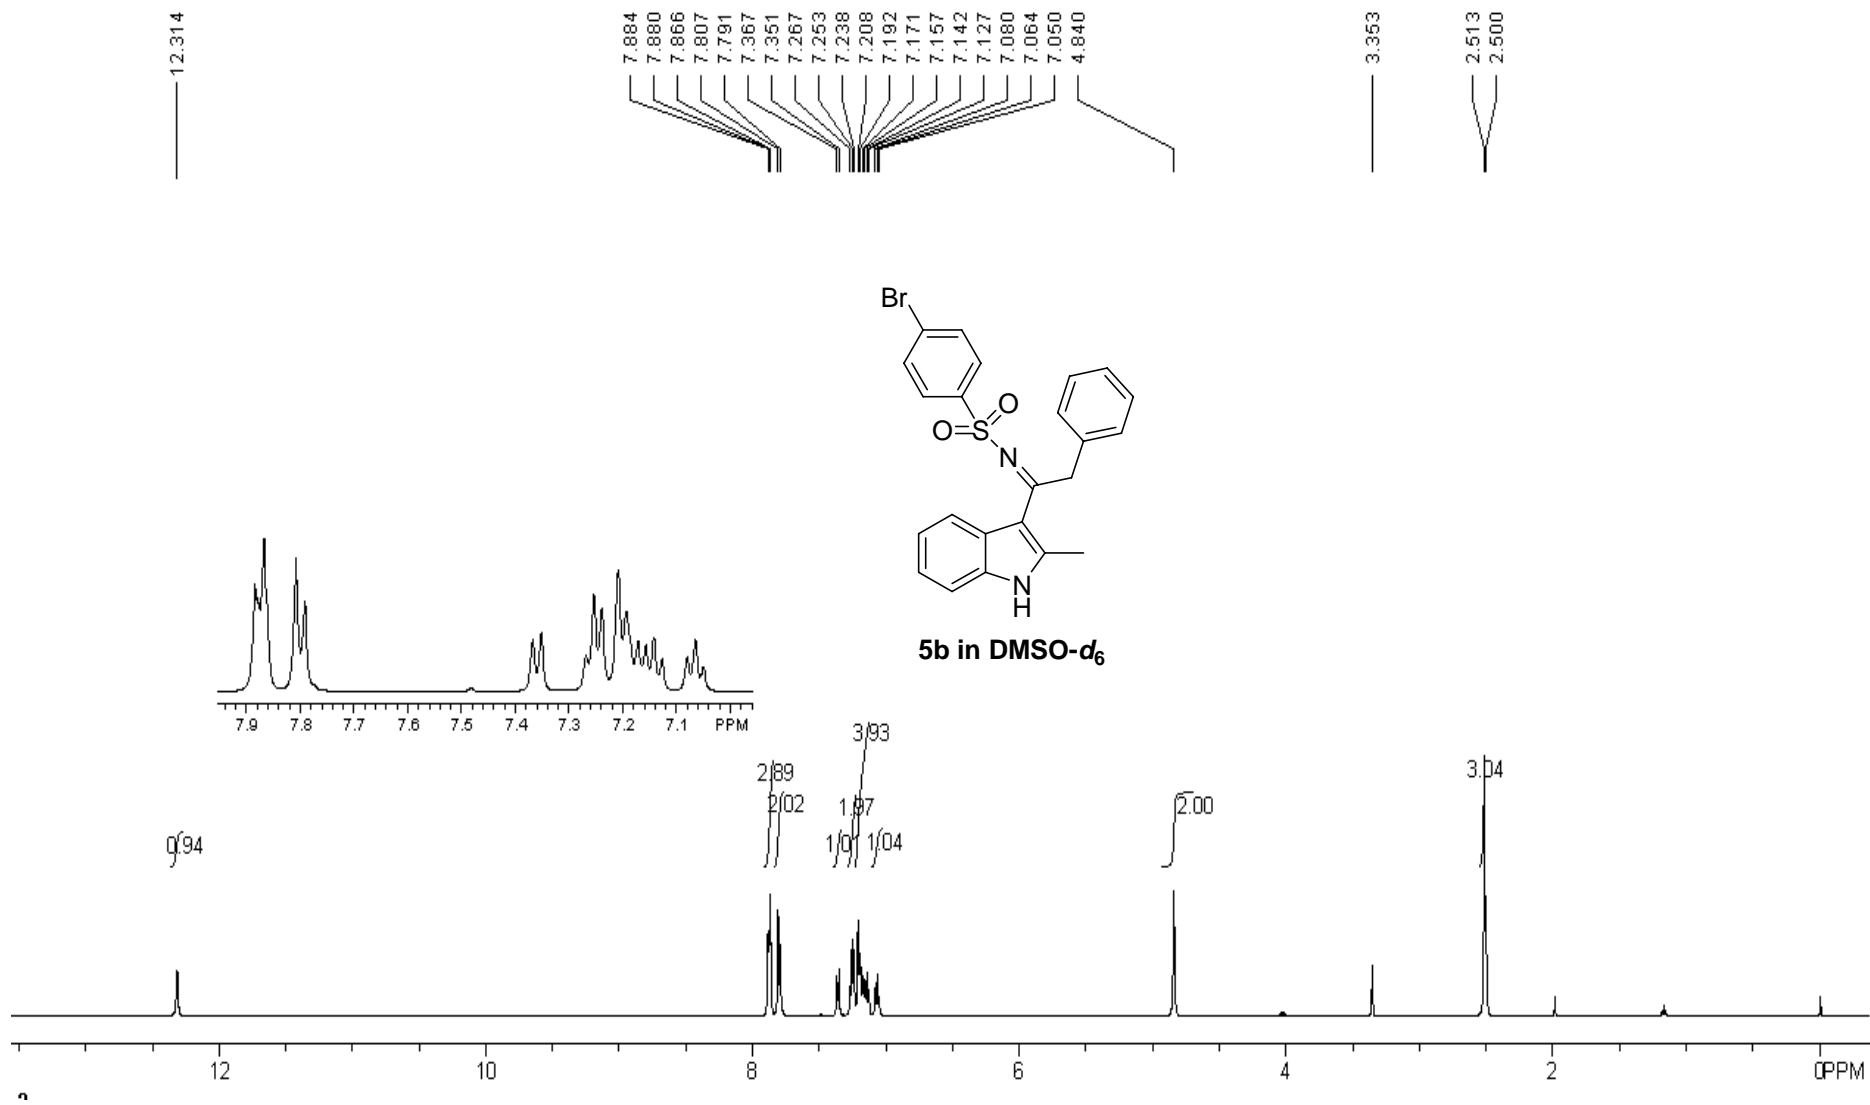

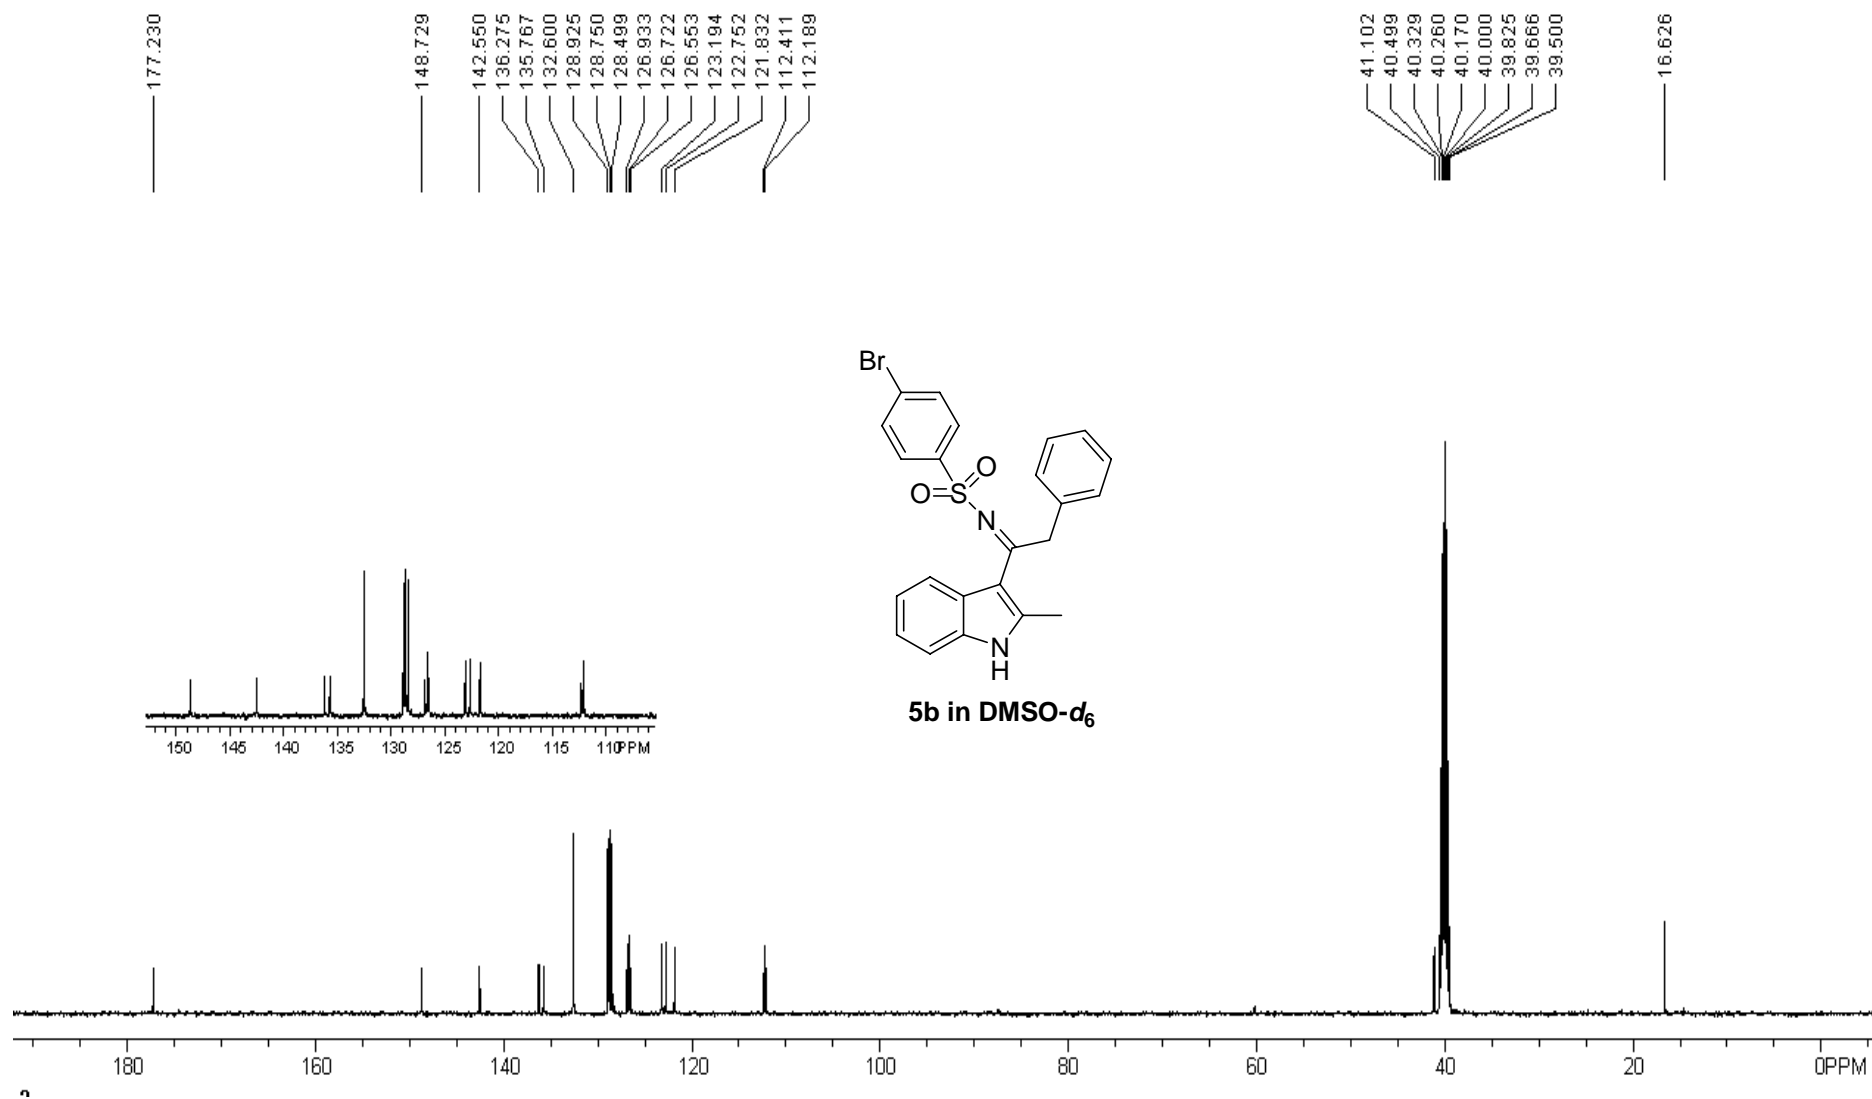

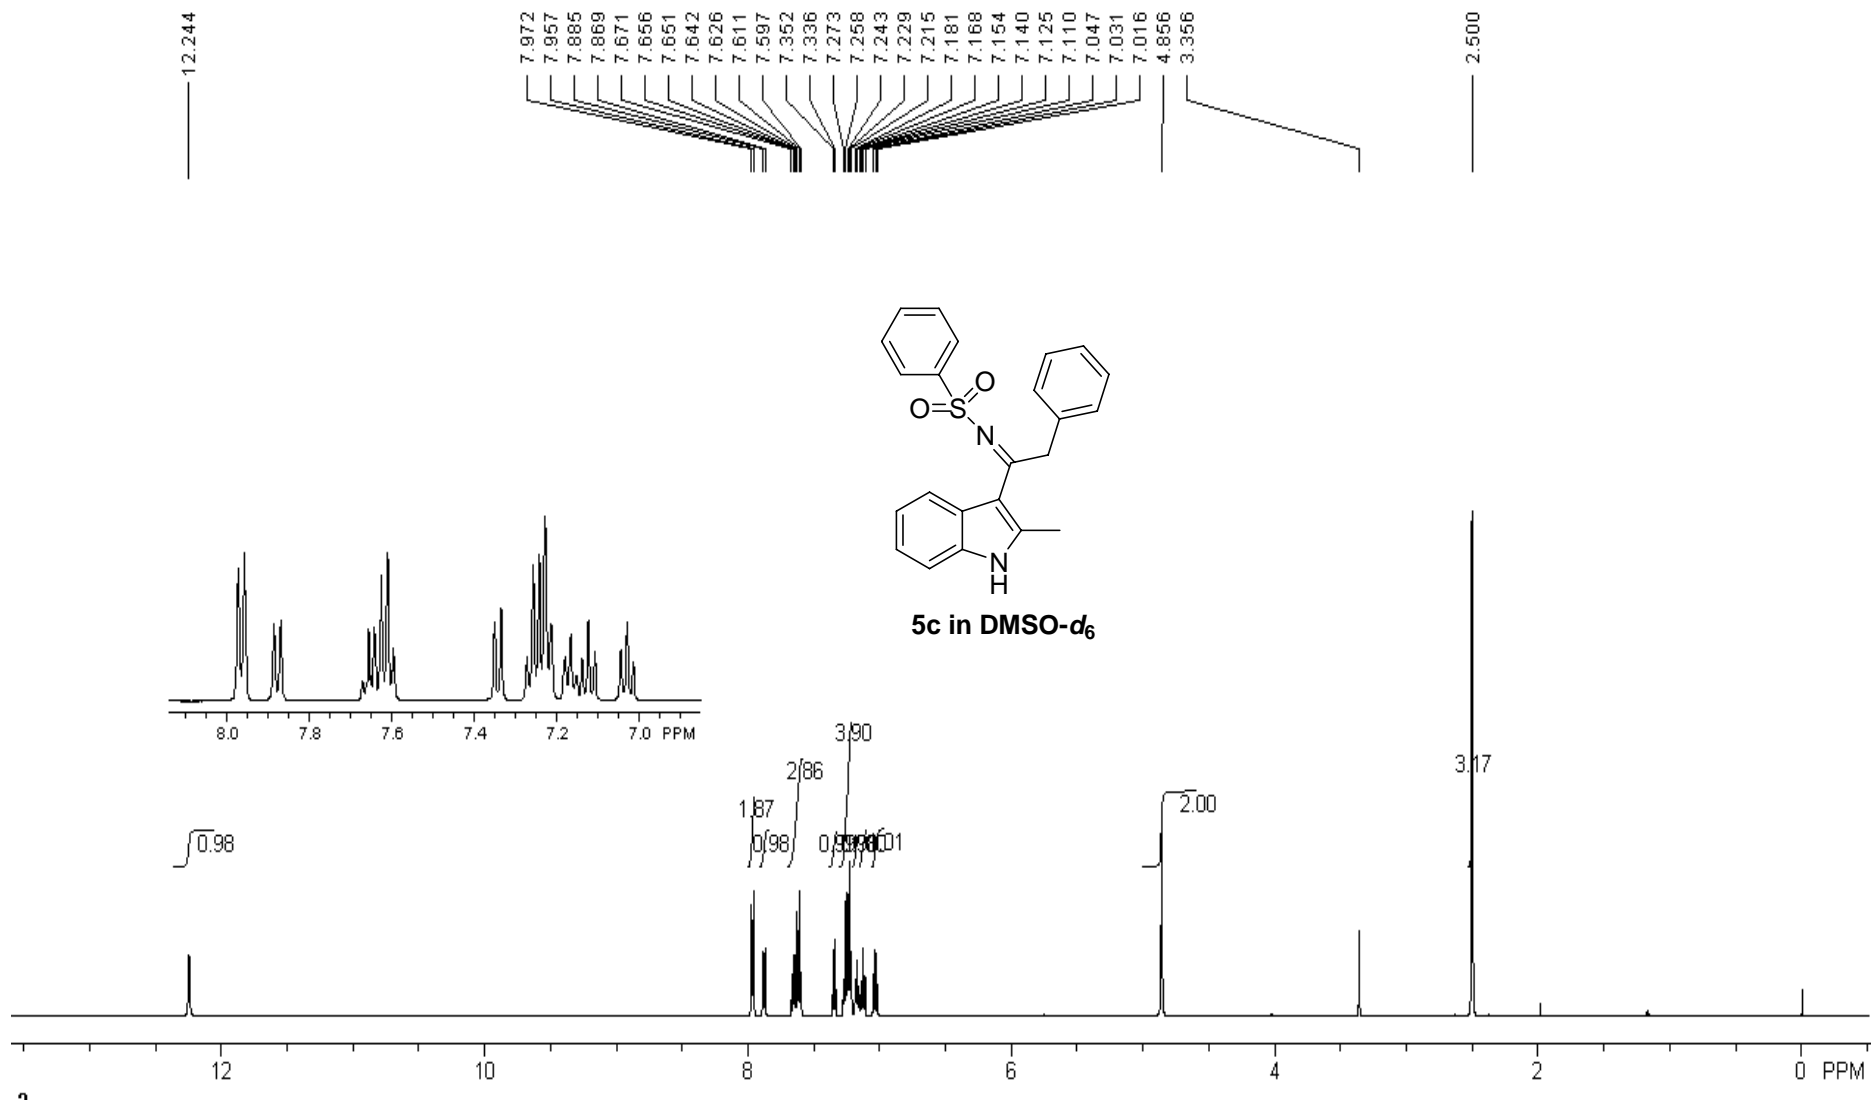

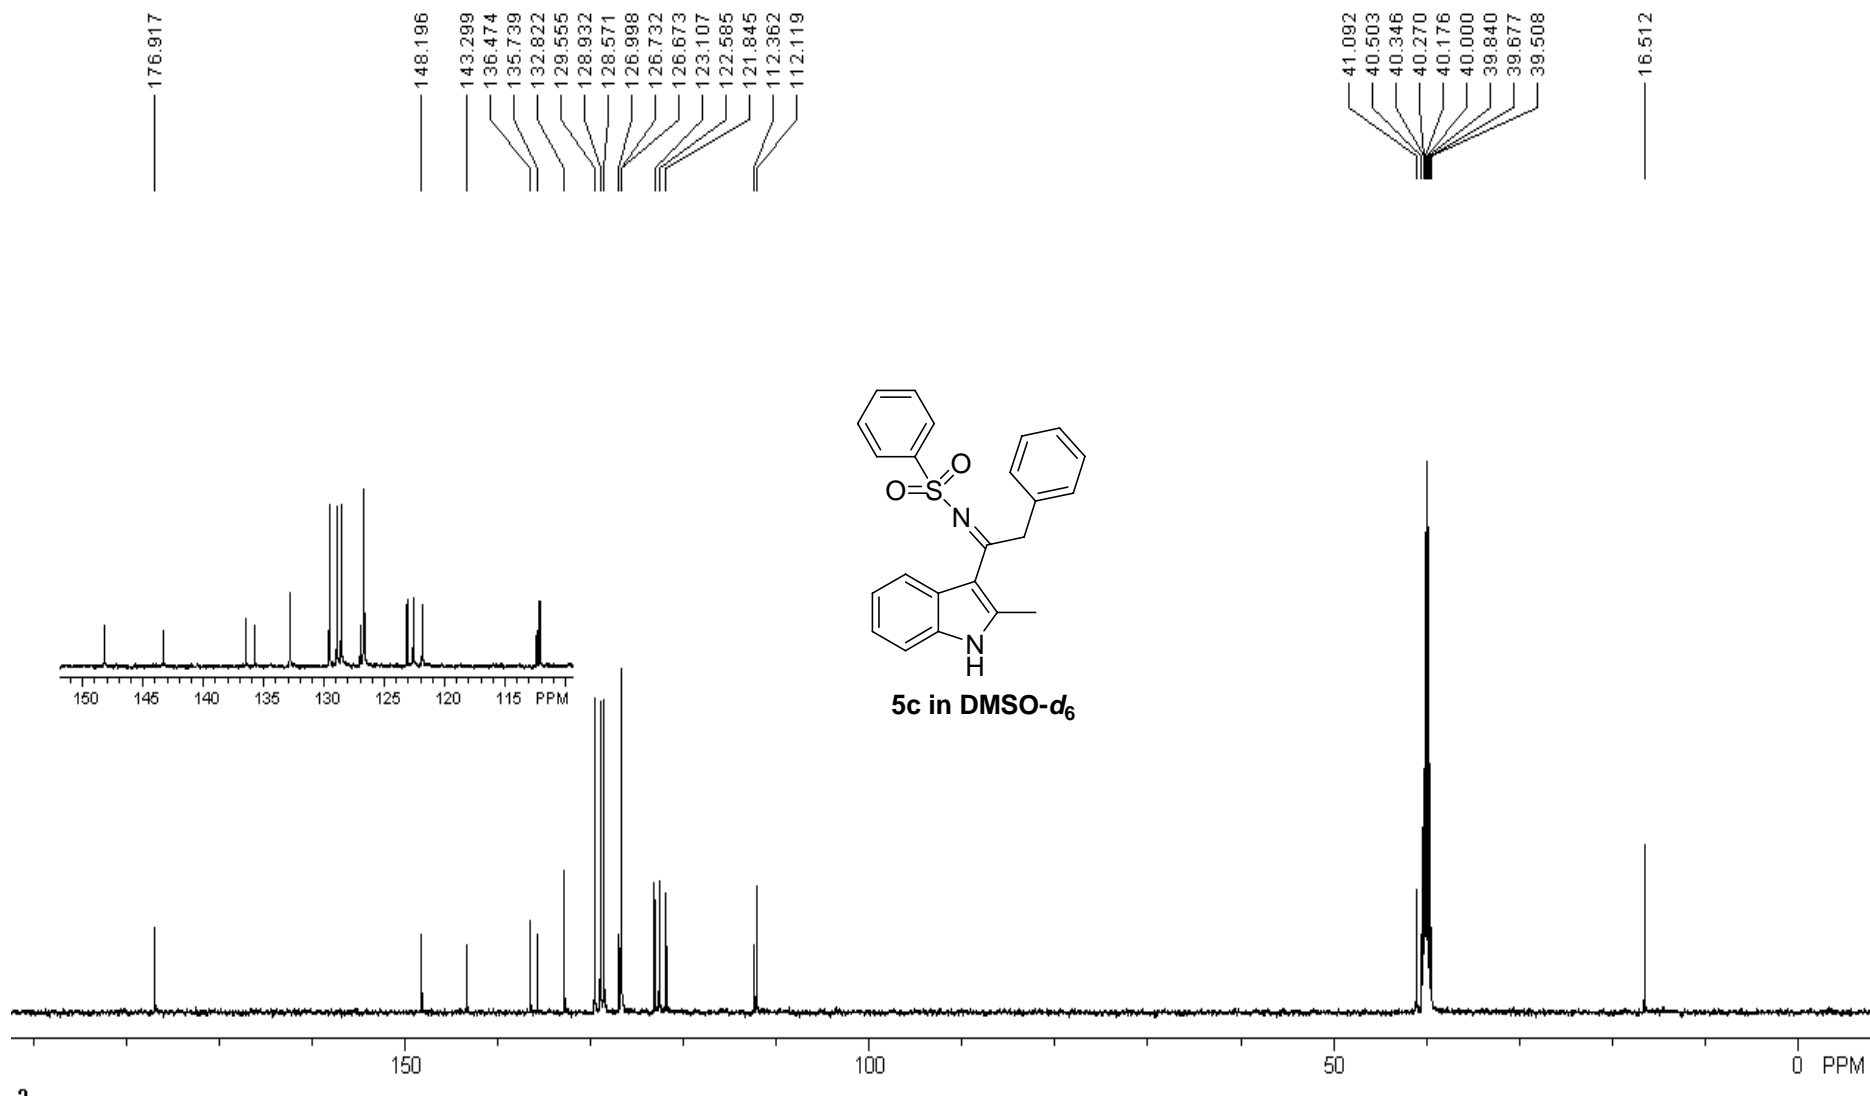

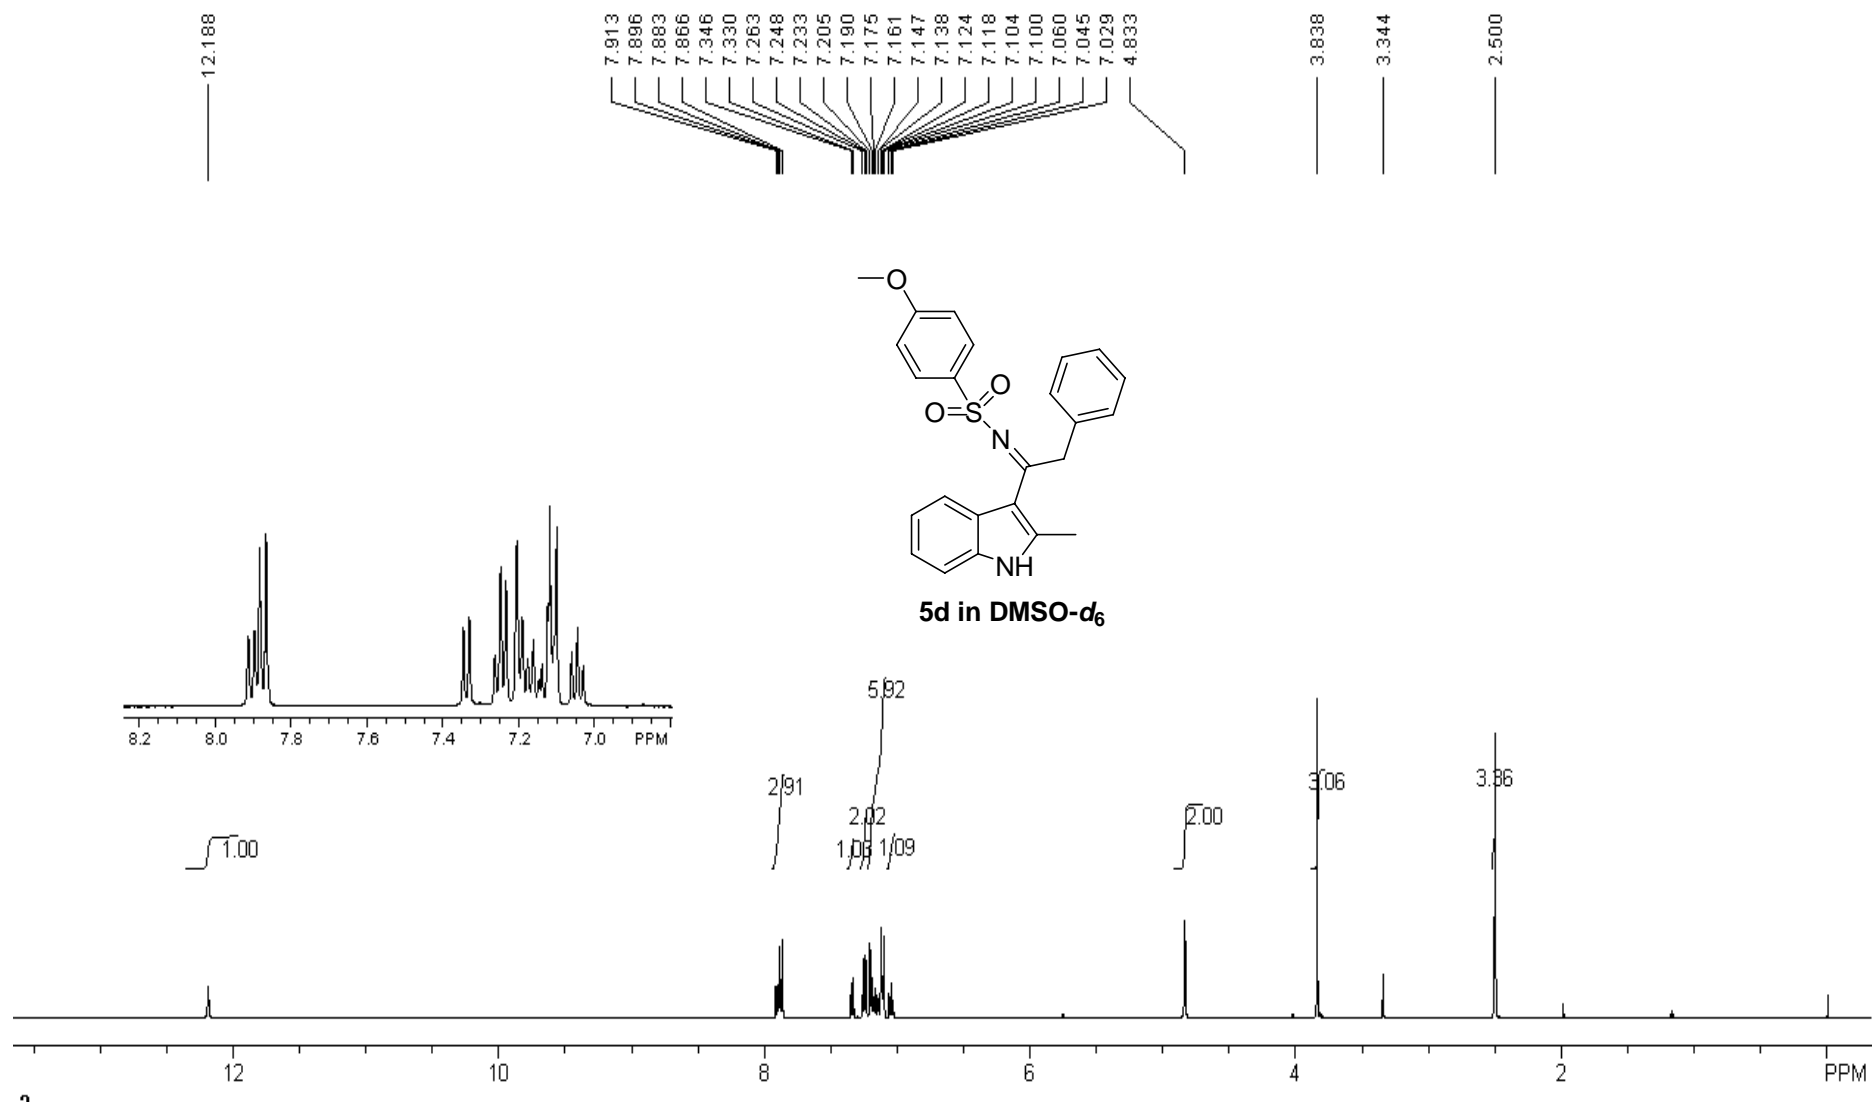

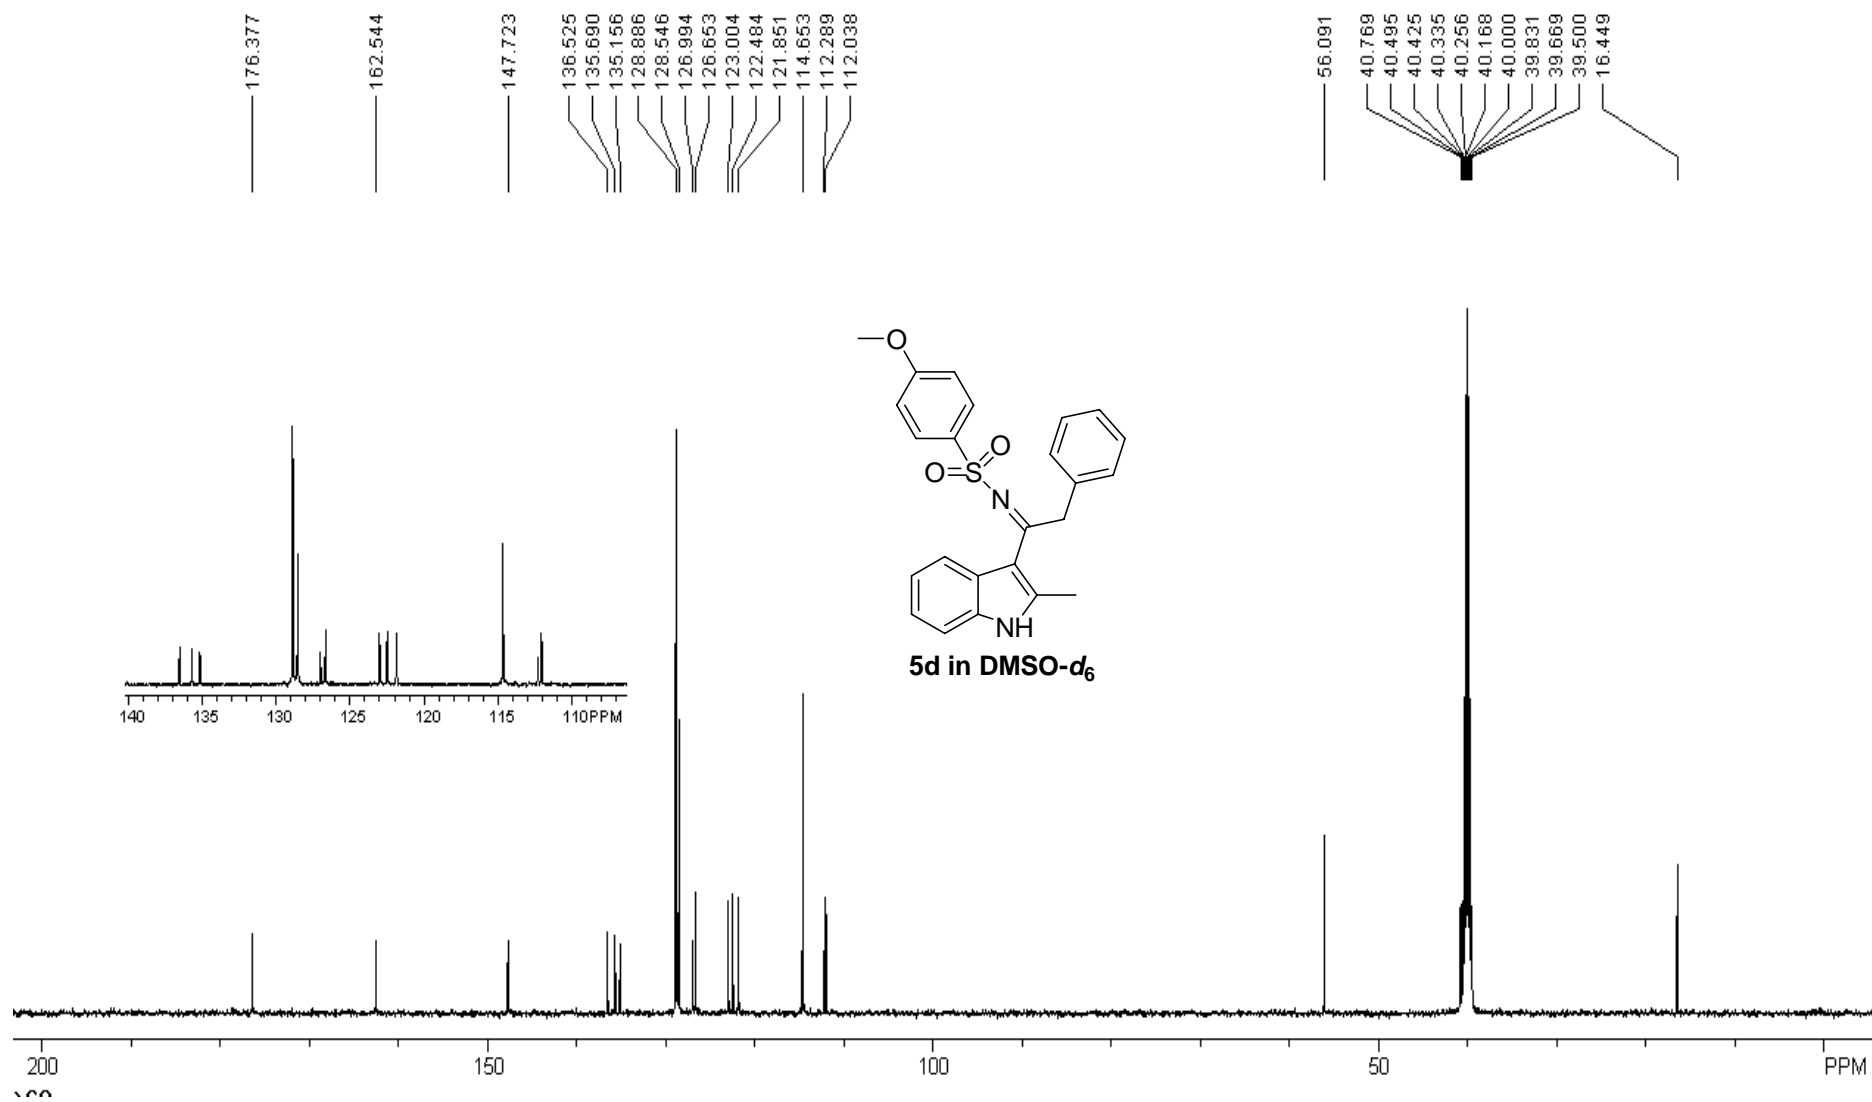

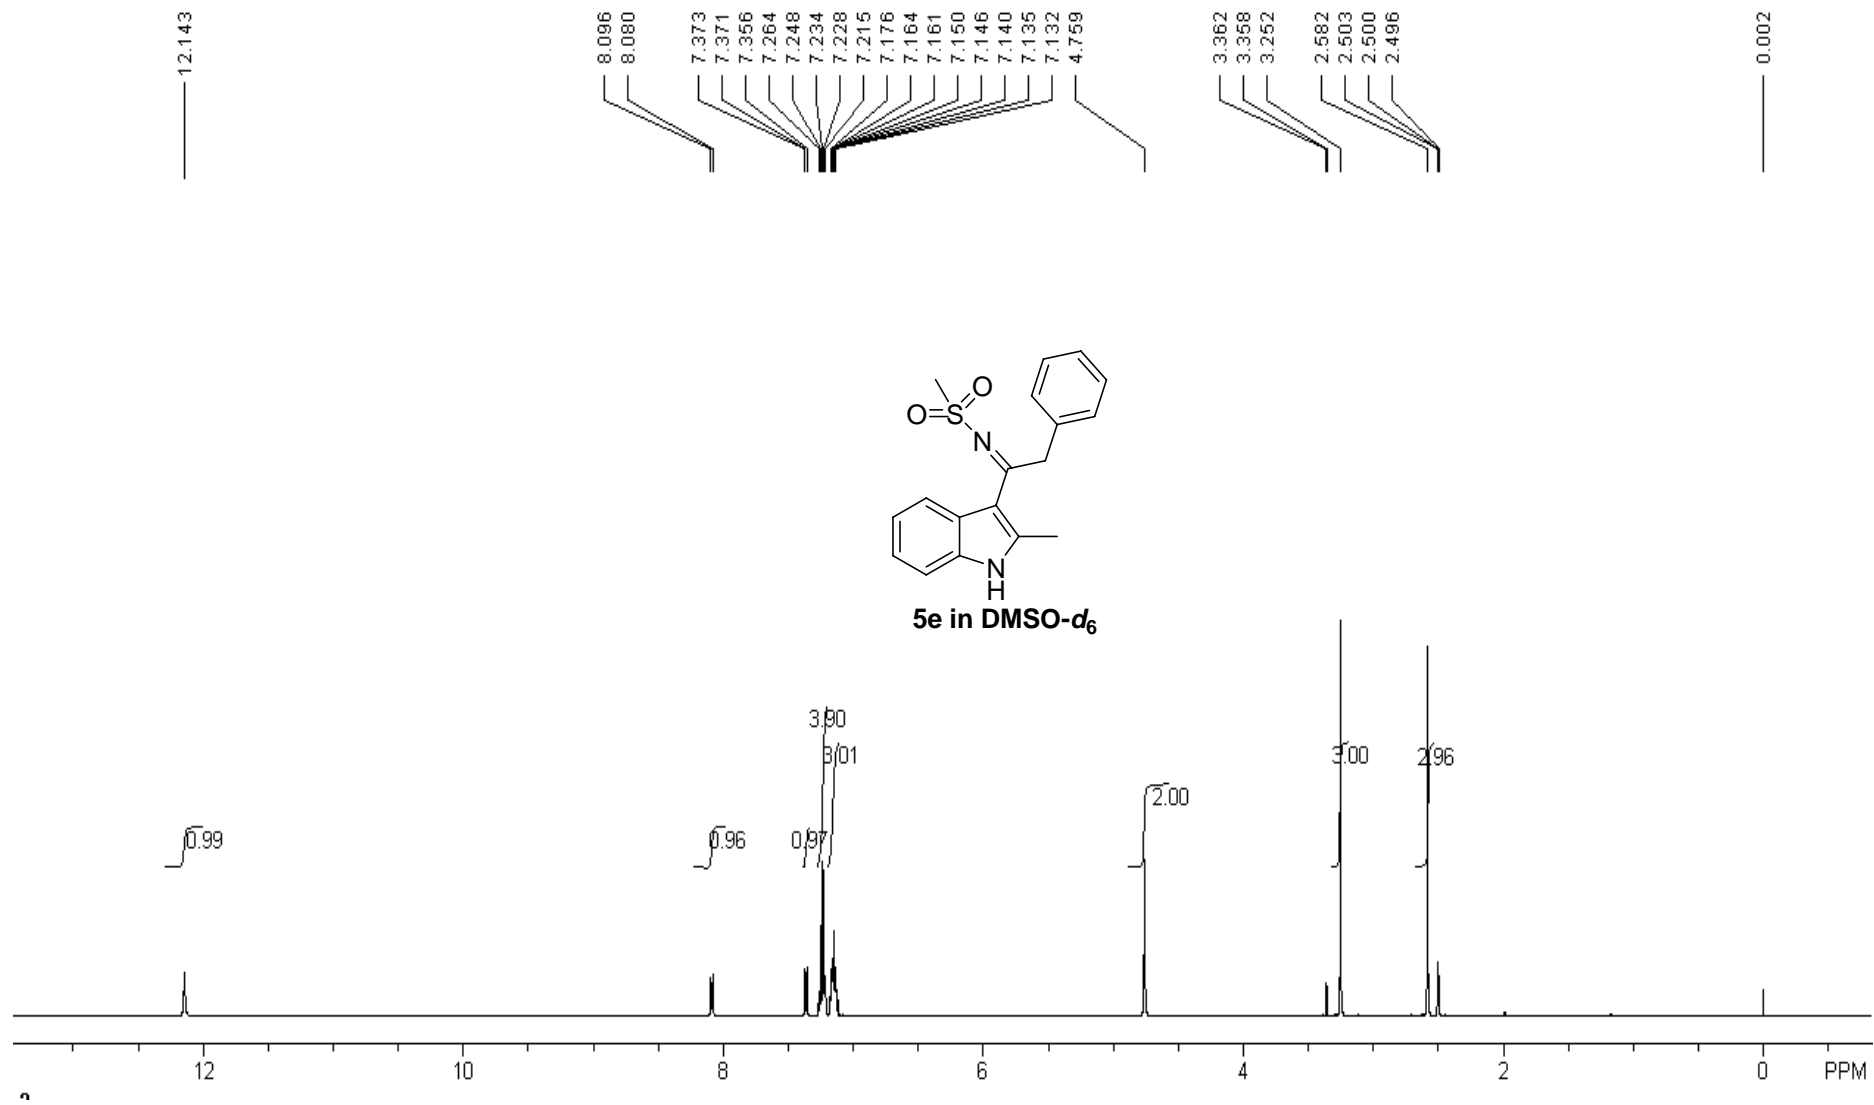



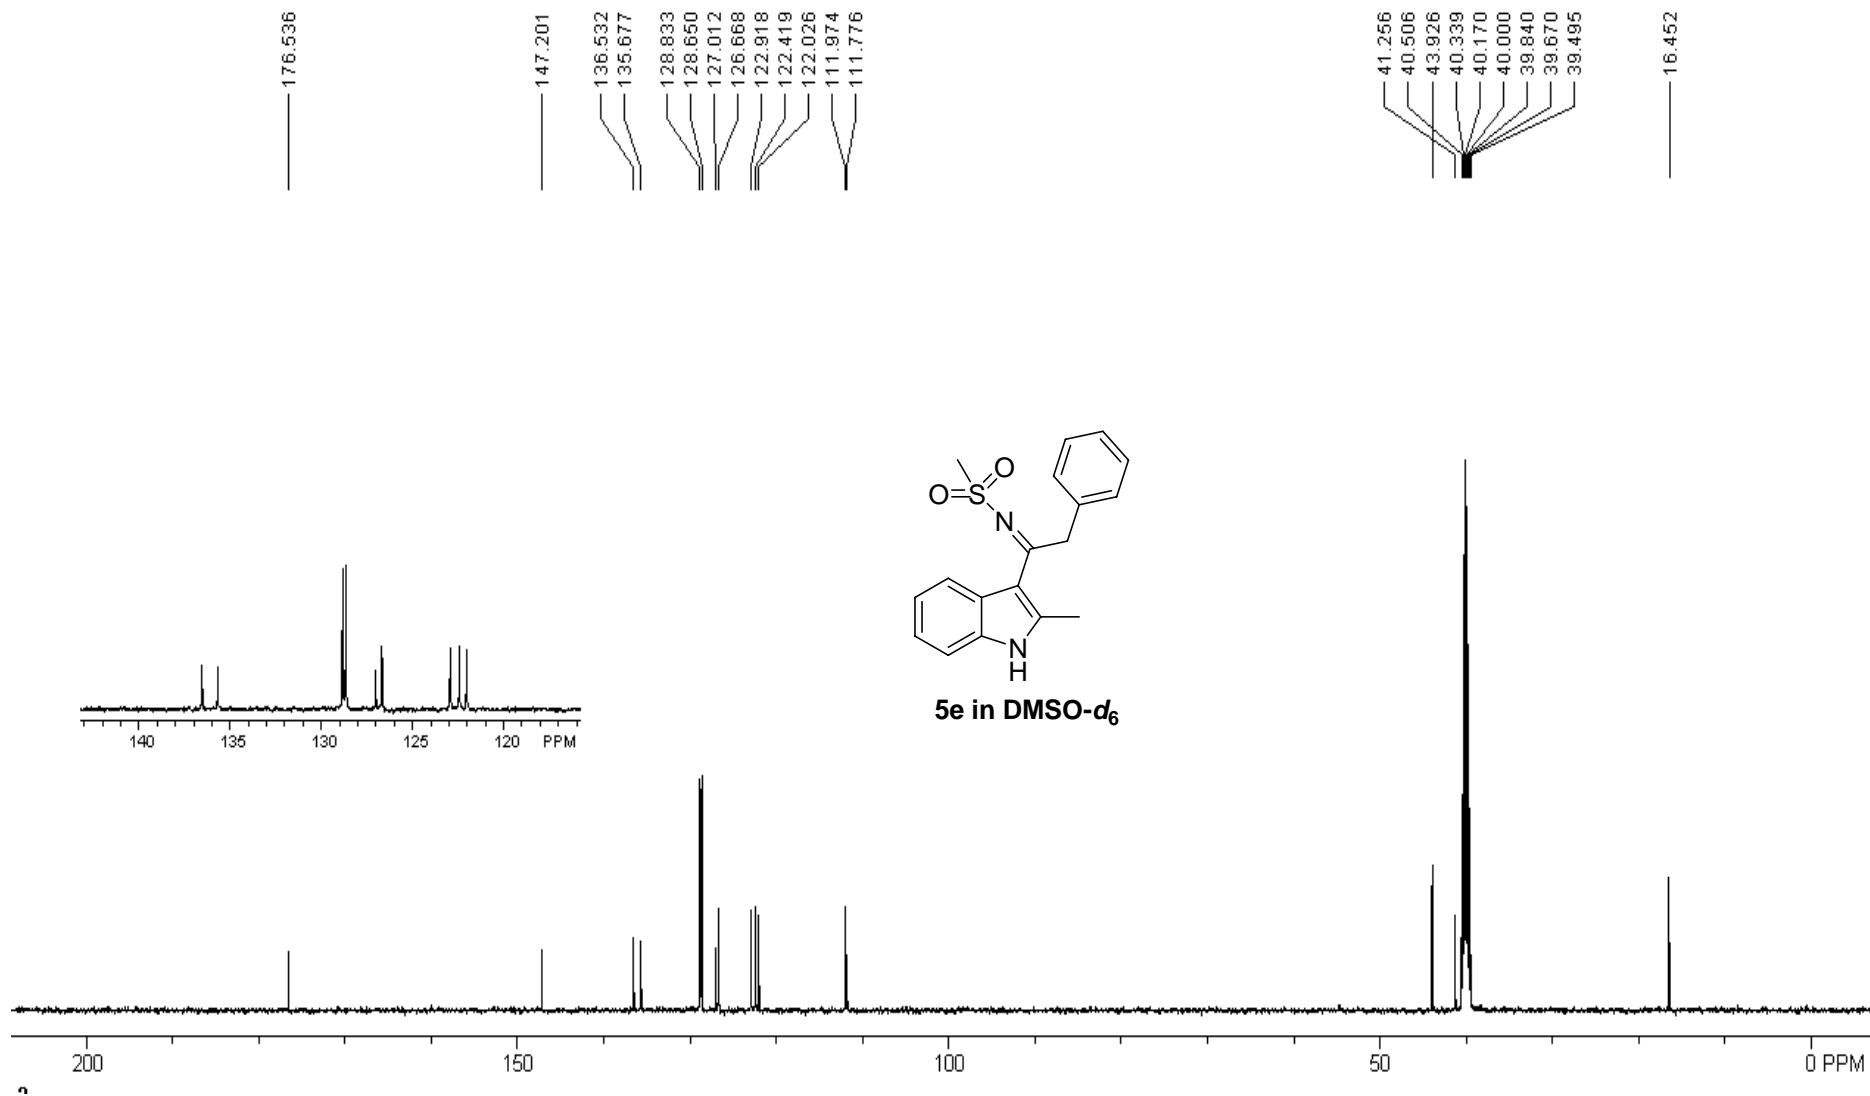

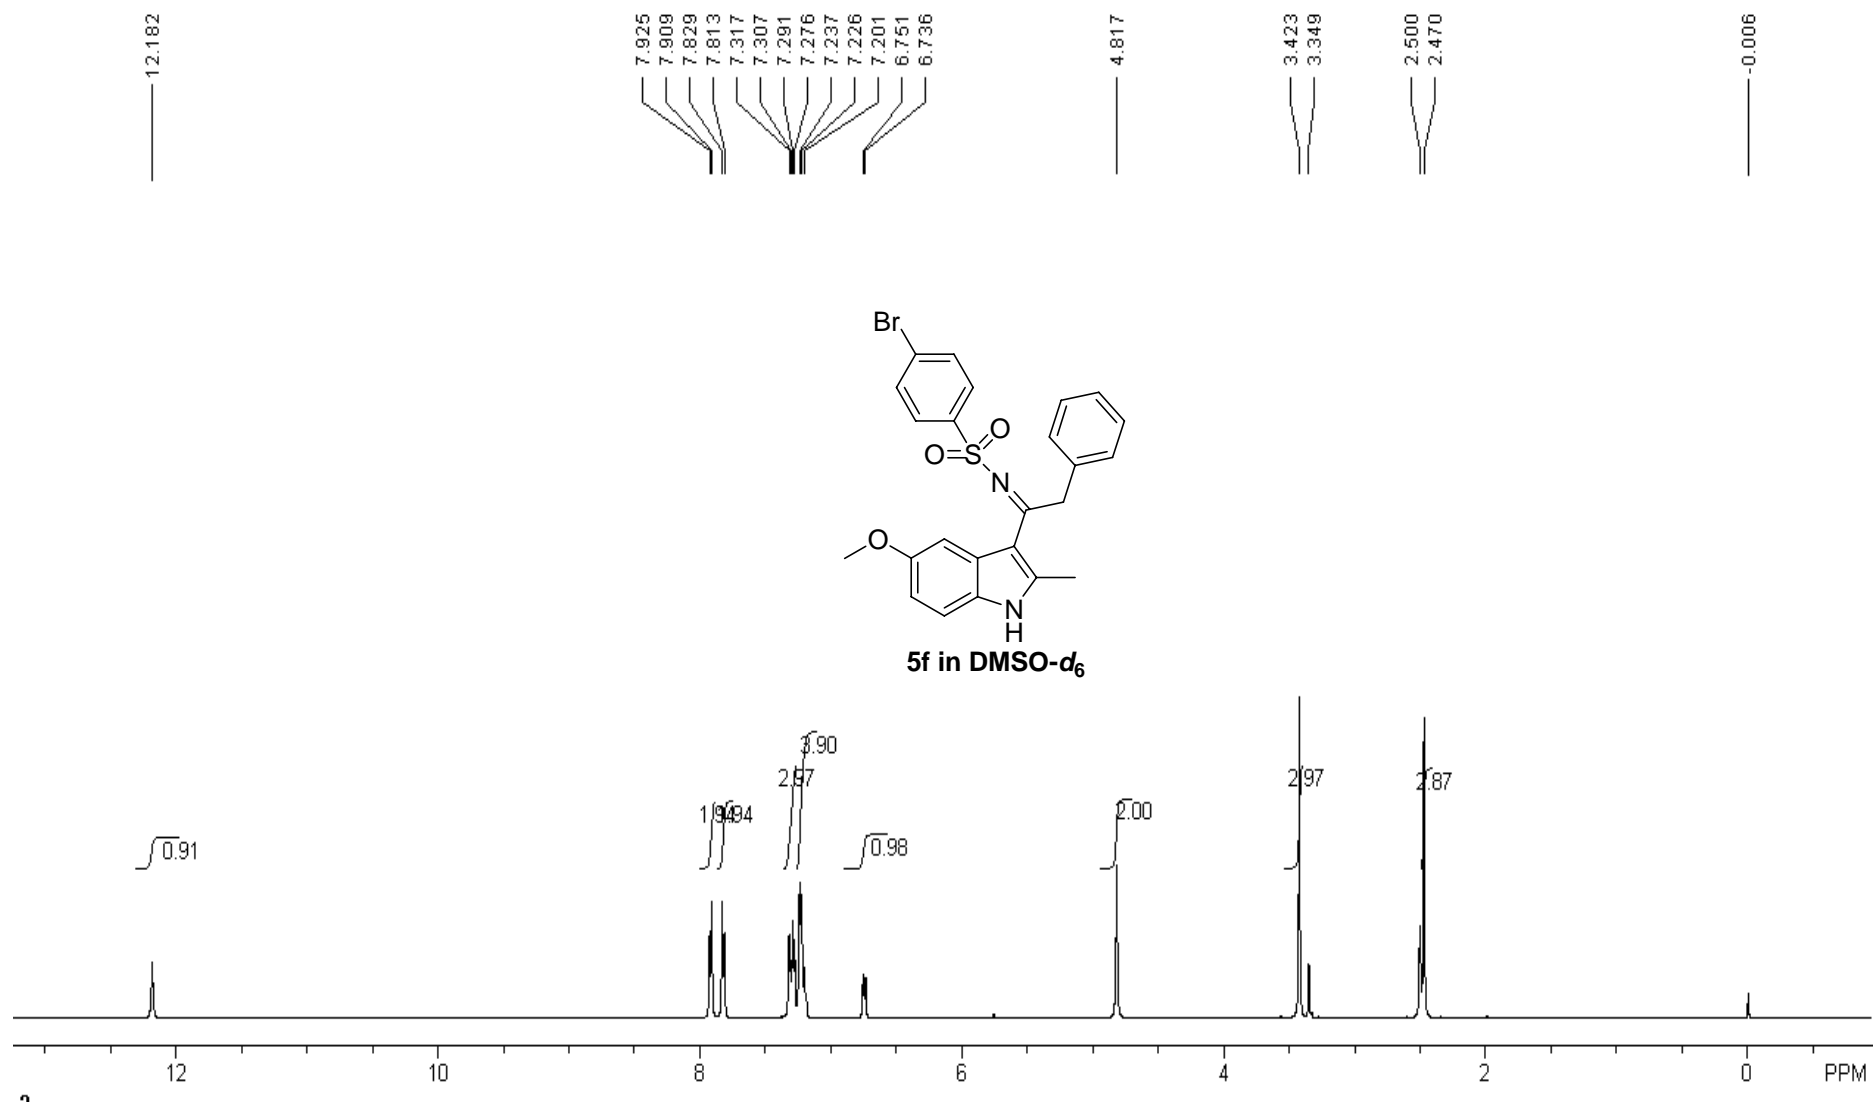

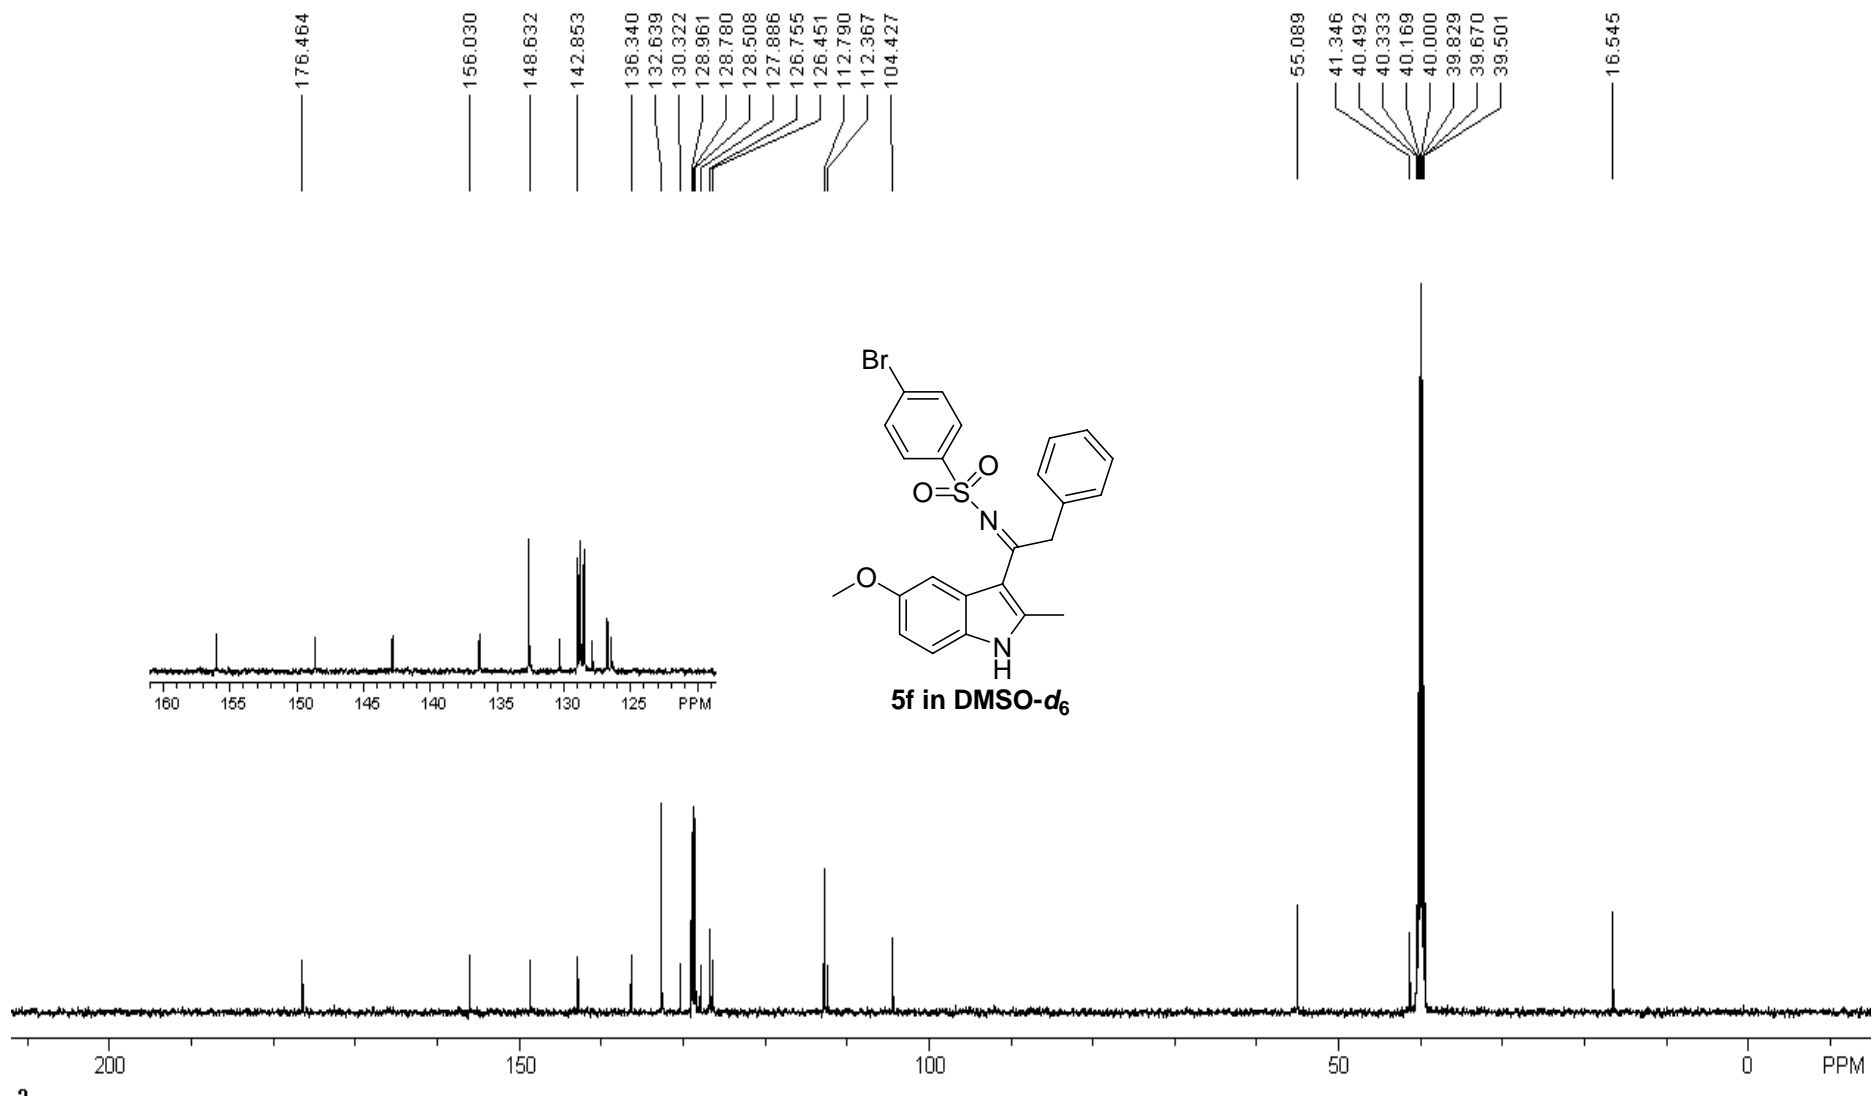

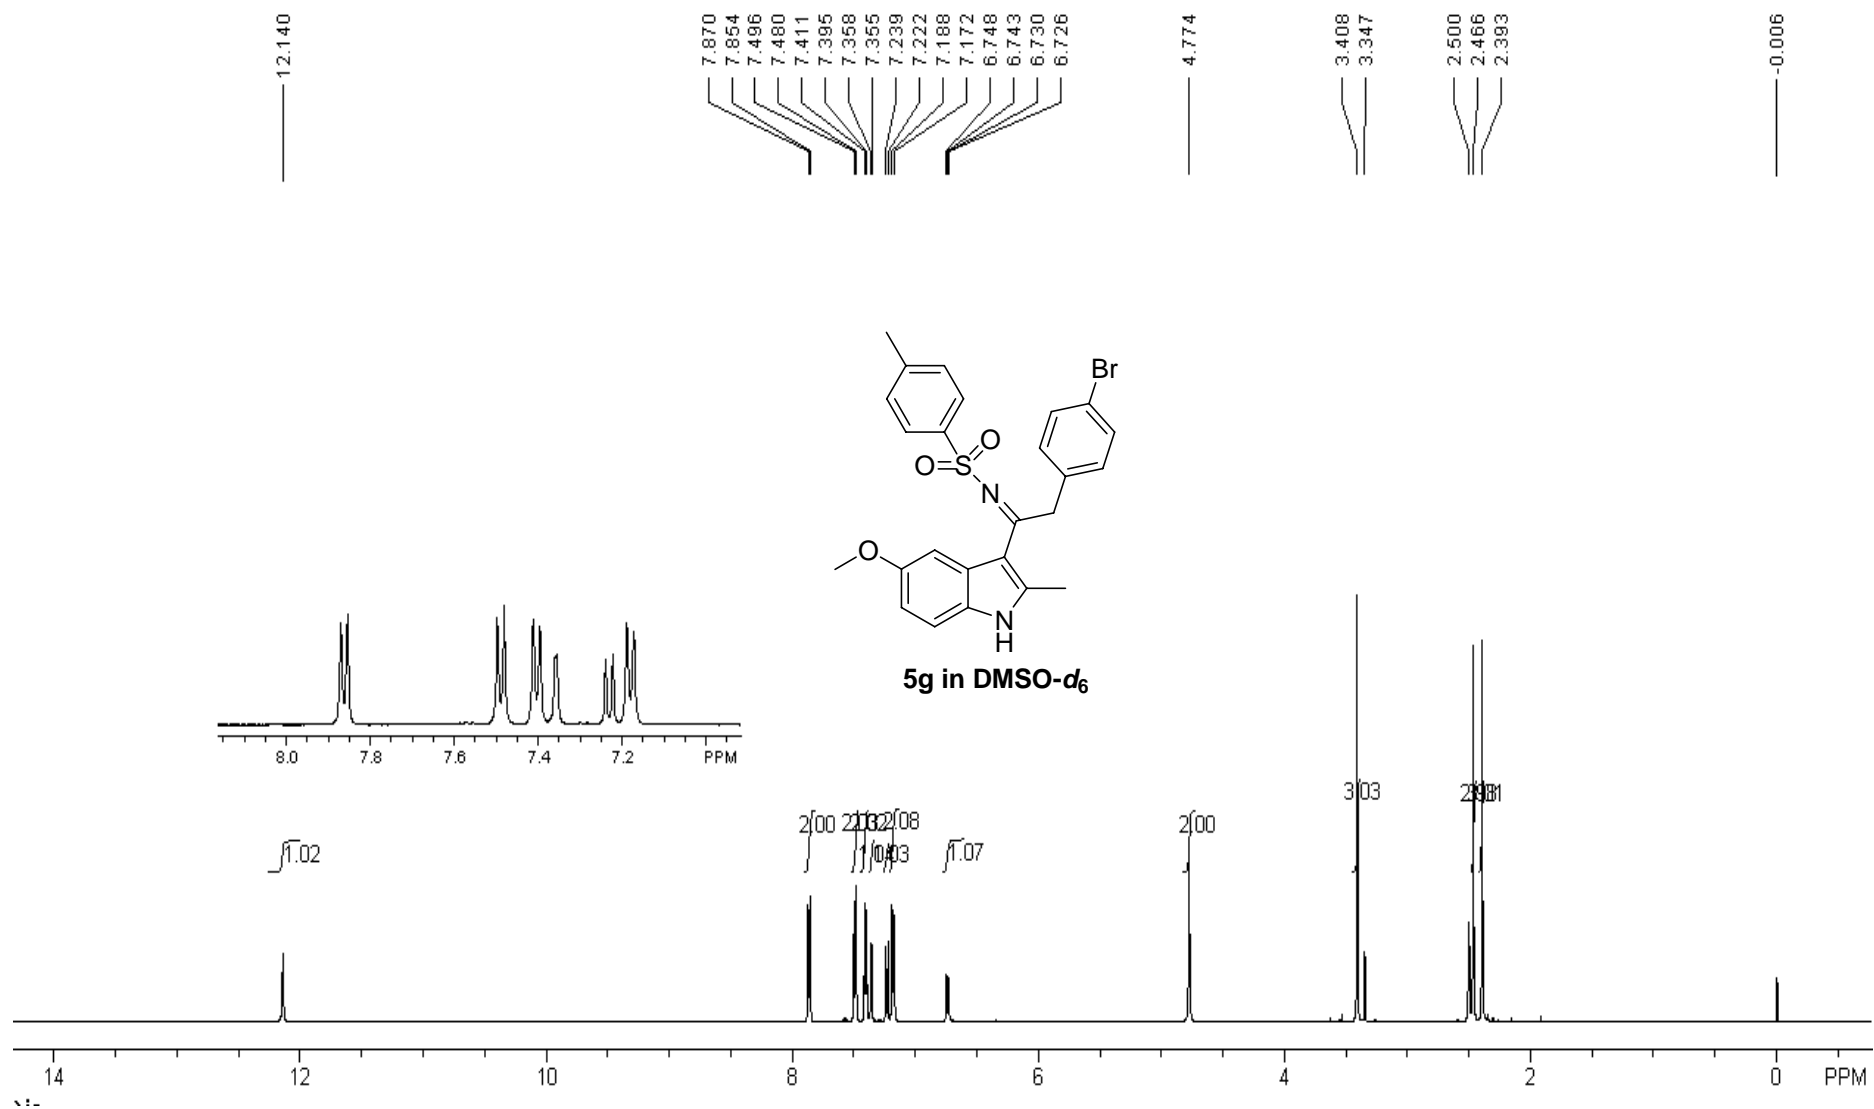

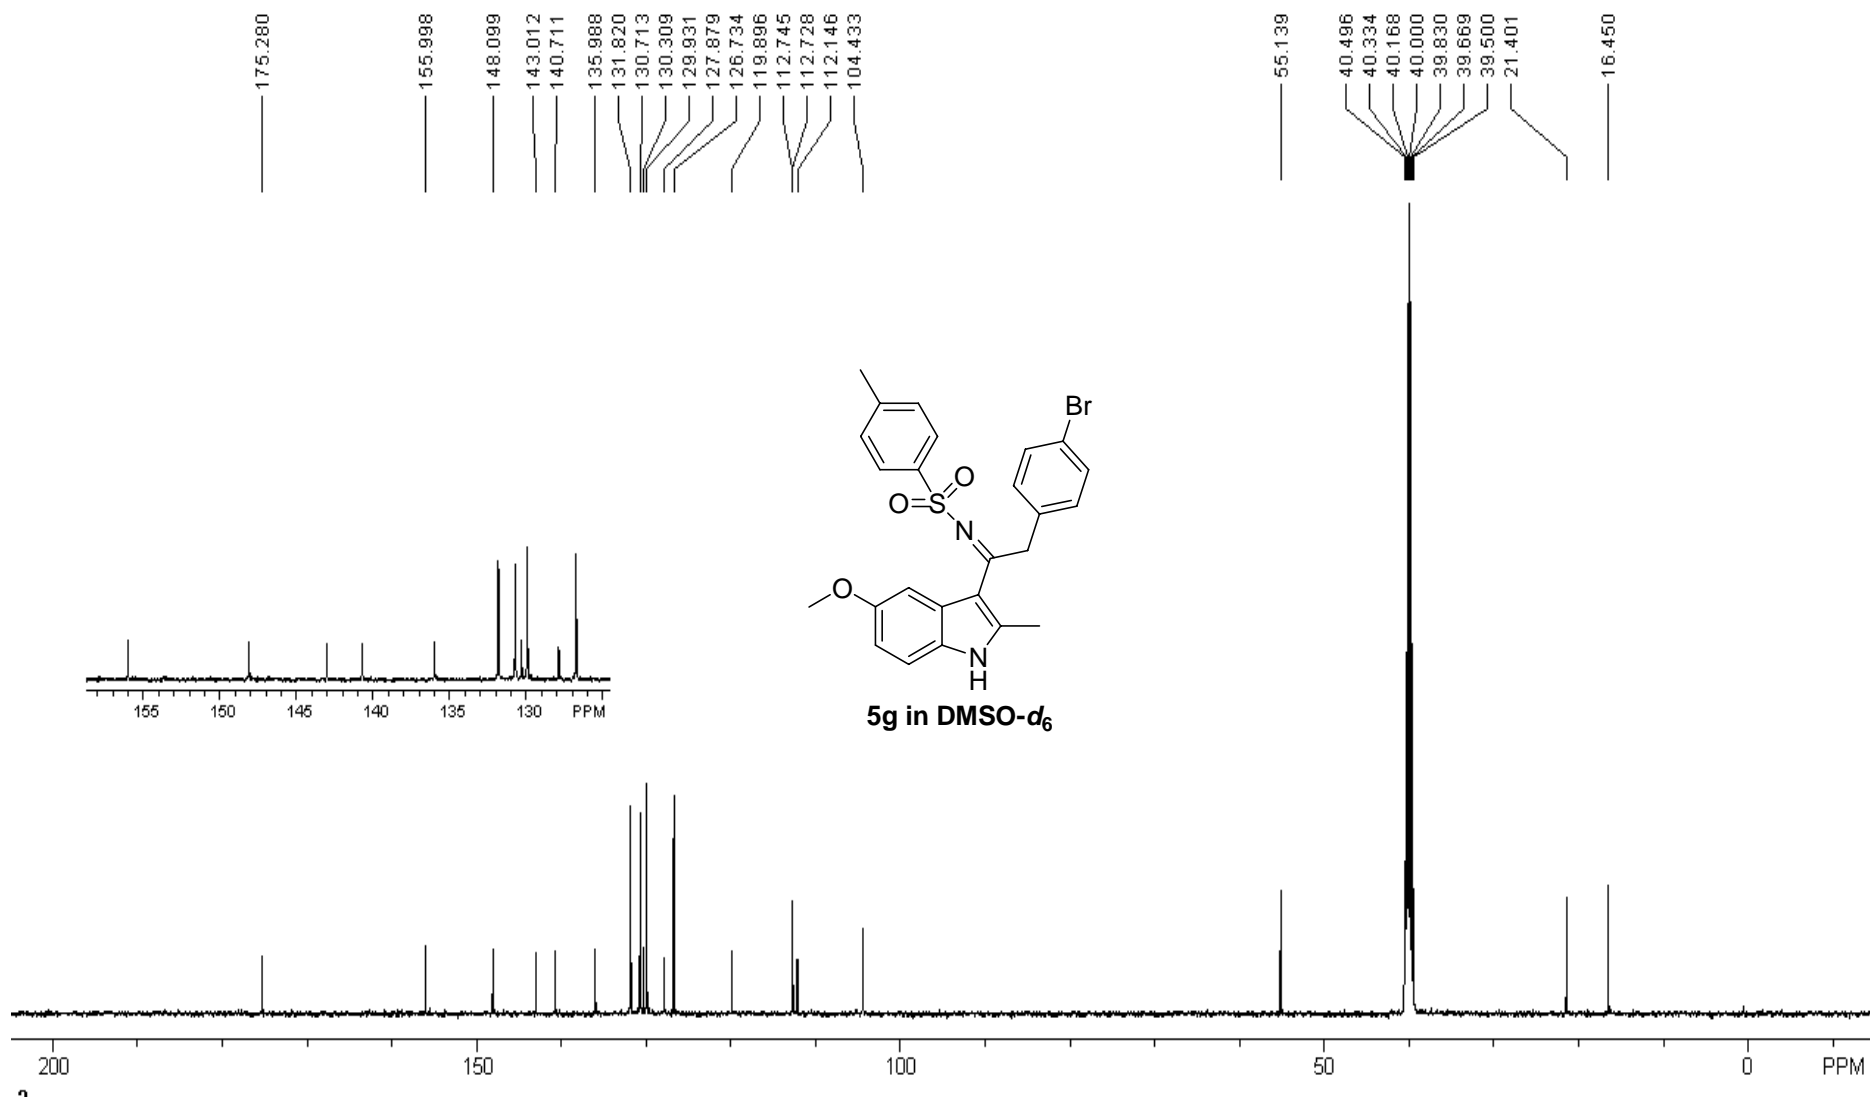

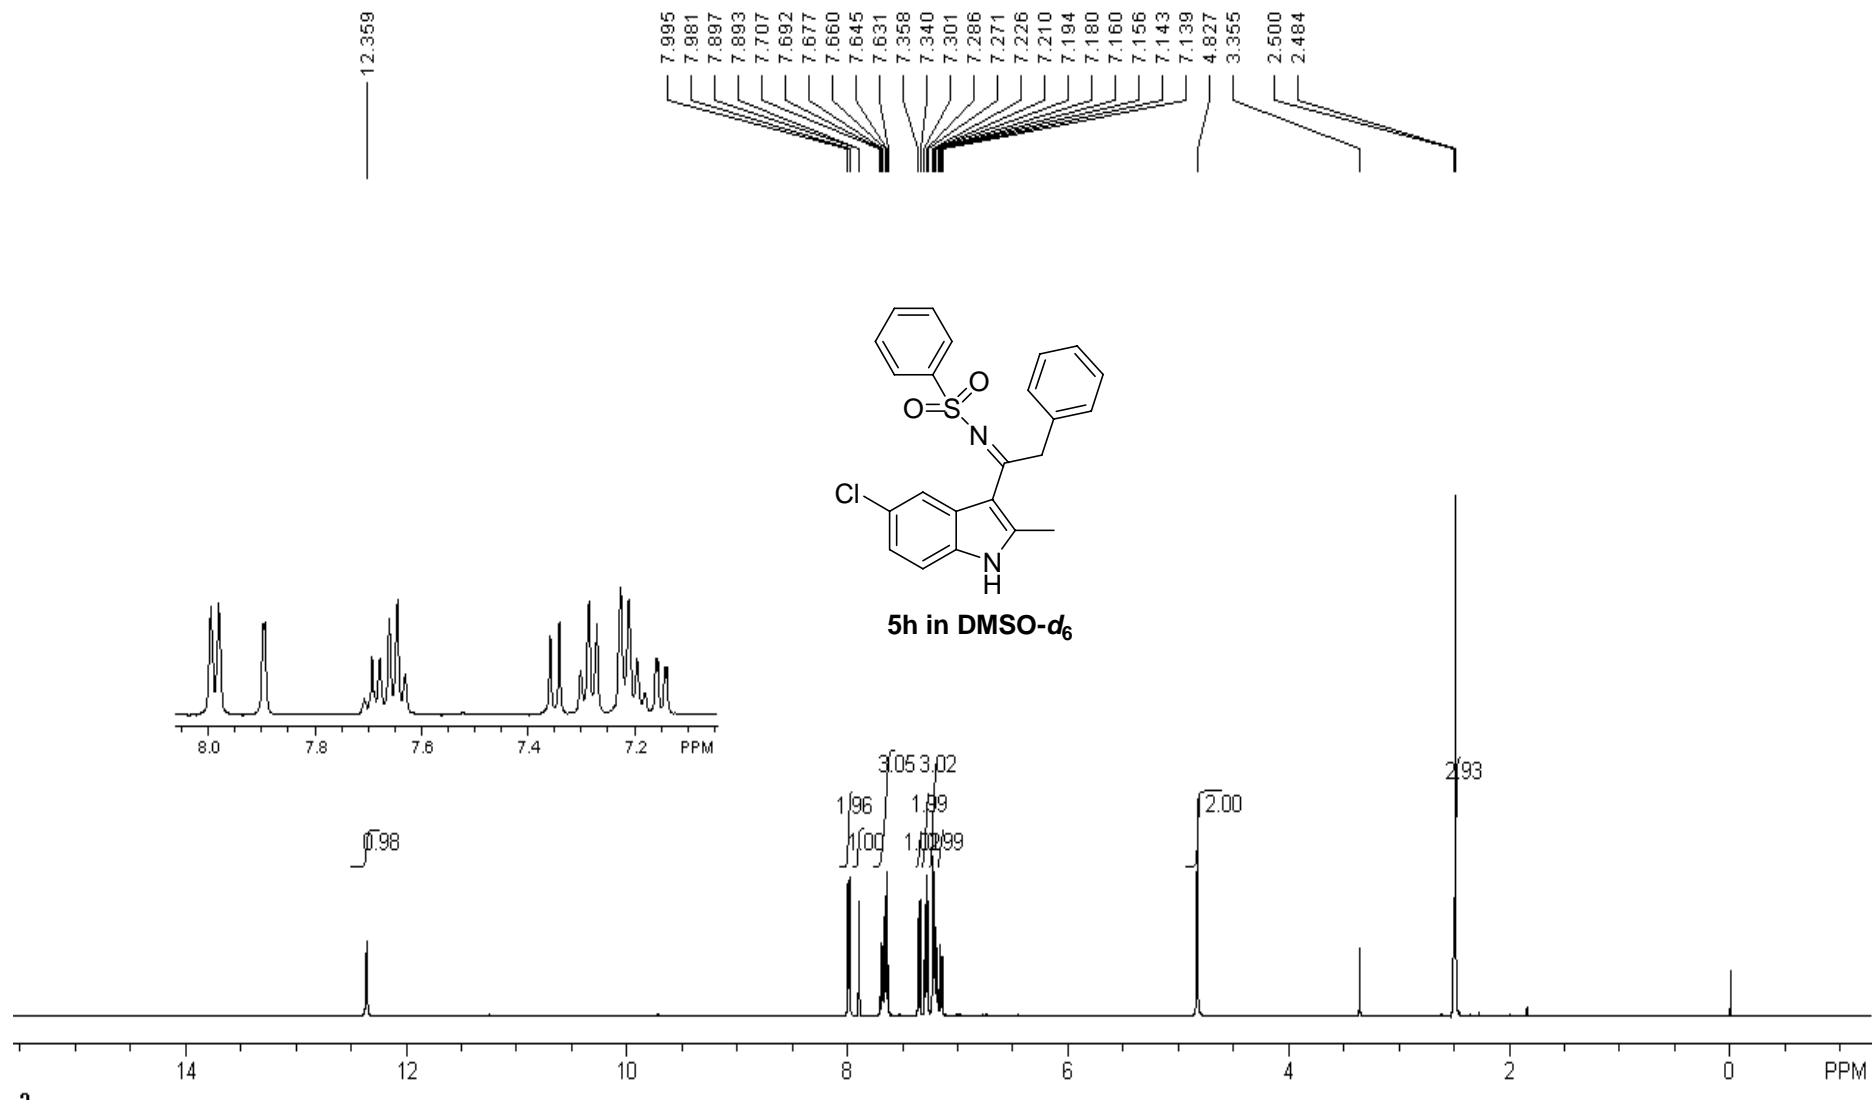

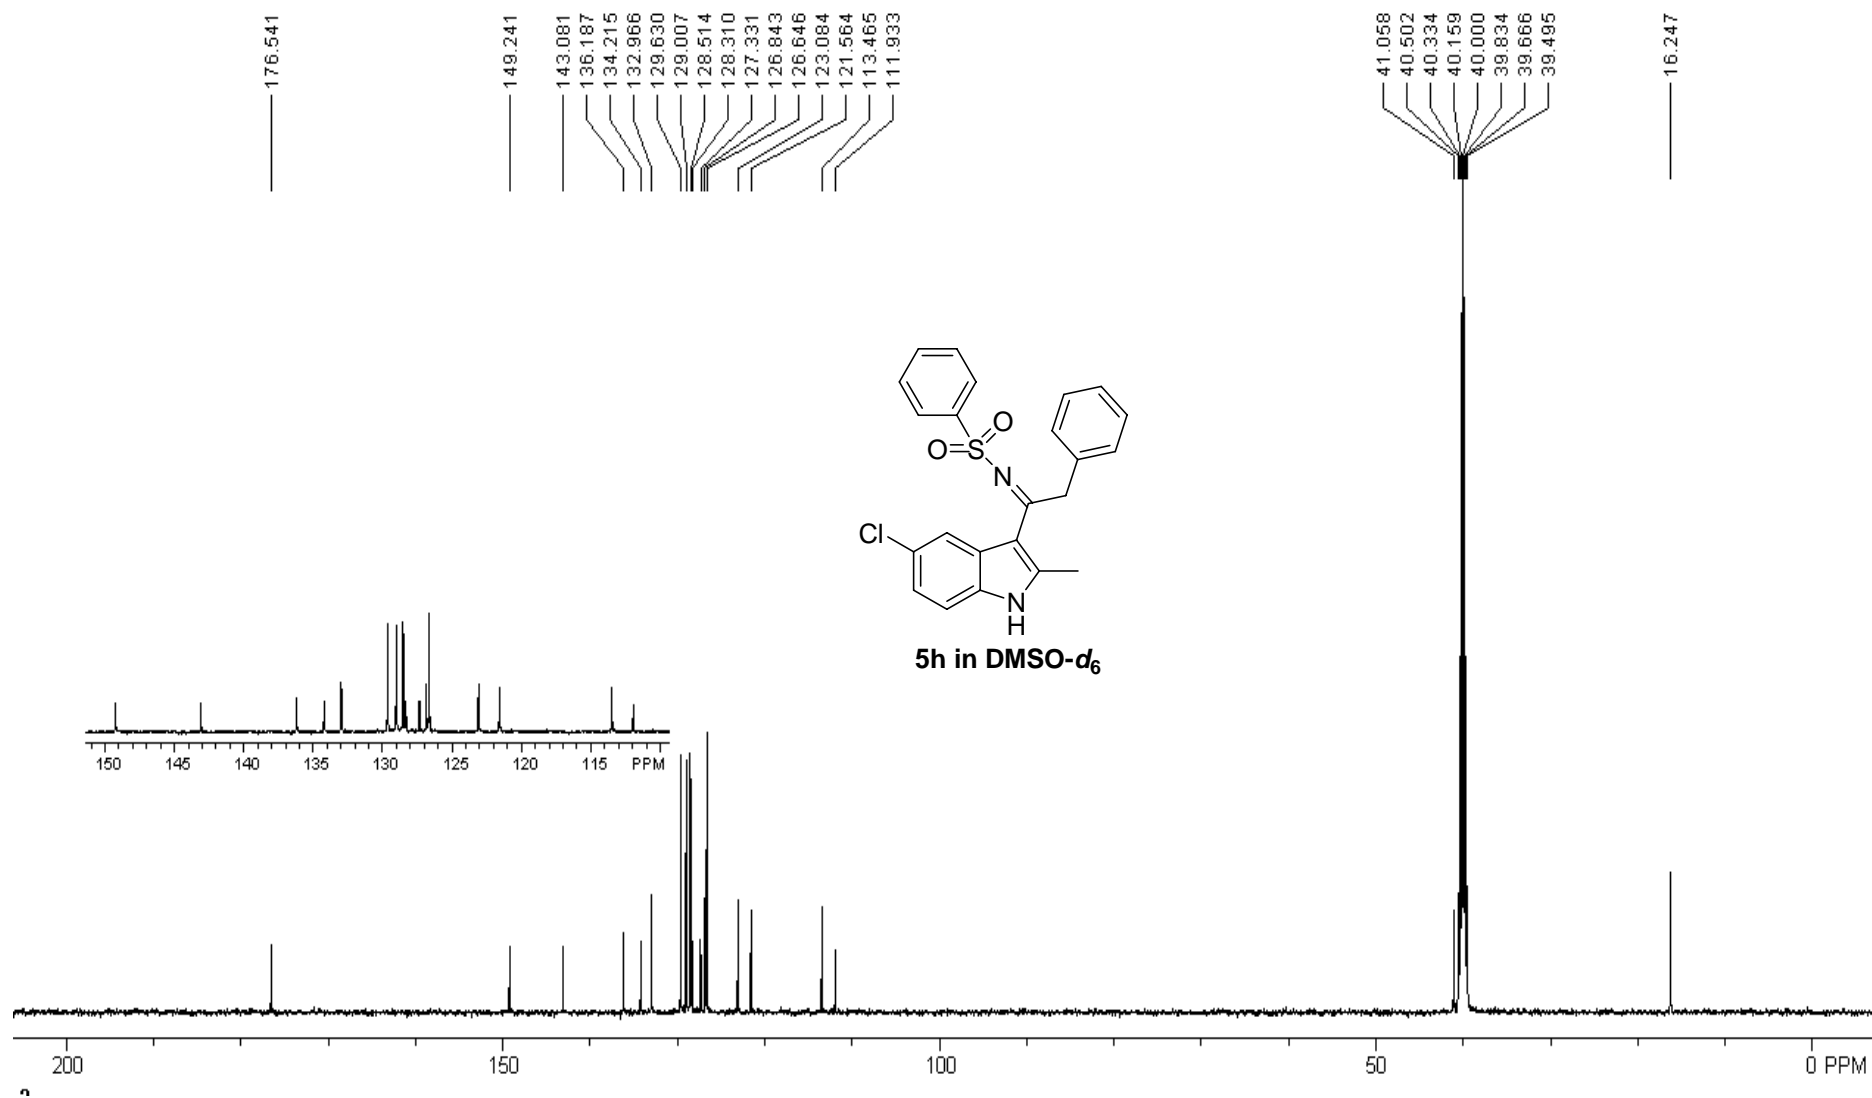

12.359

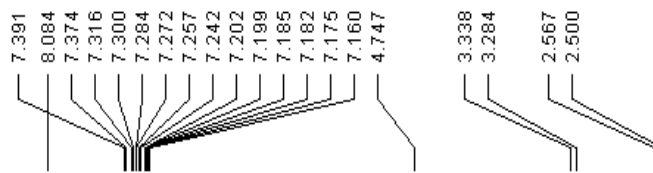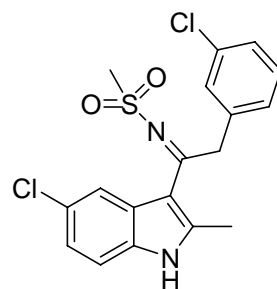

5i in DMSO-*d*<sub>6</sub>

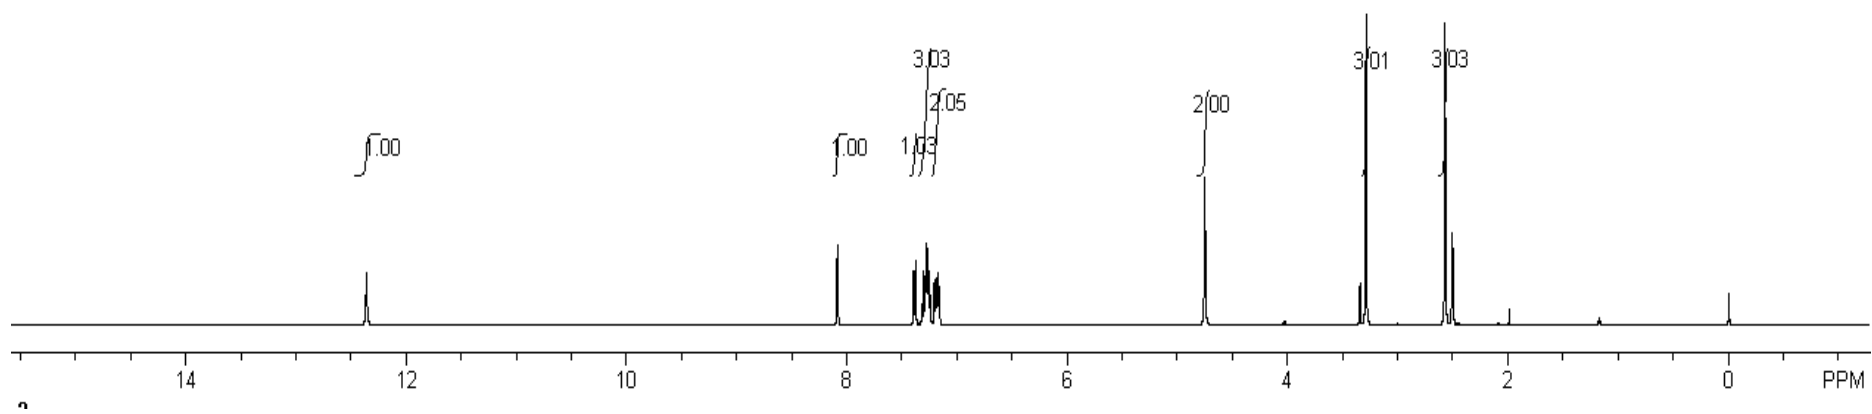



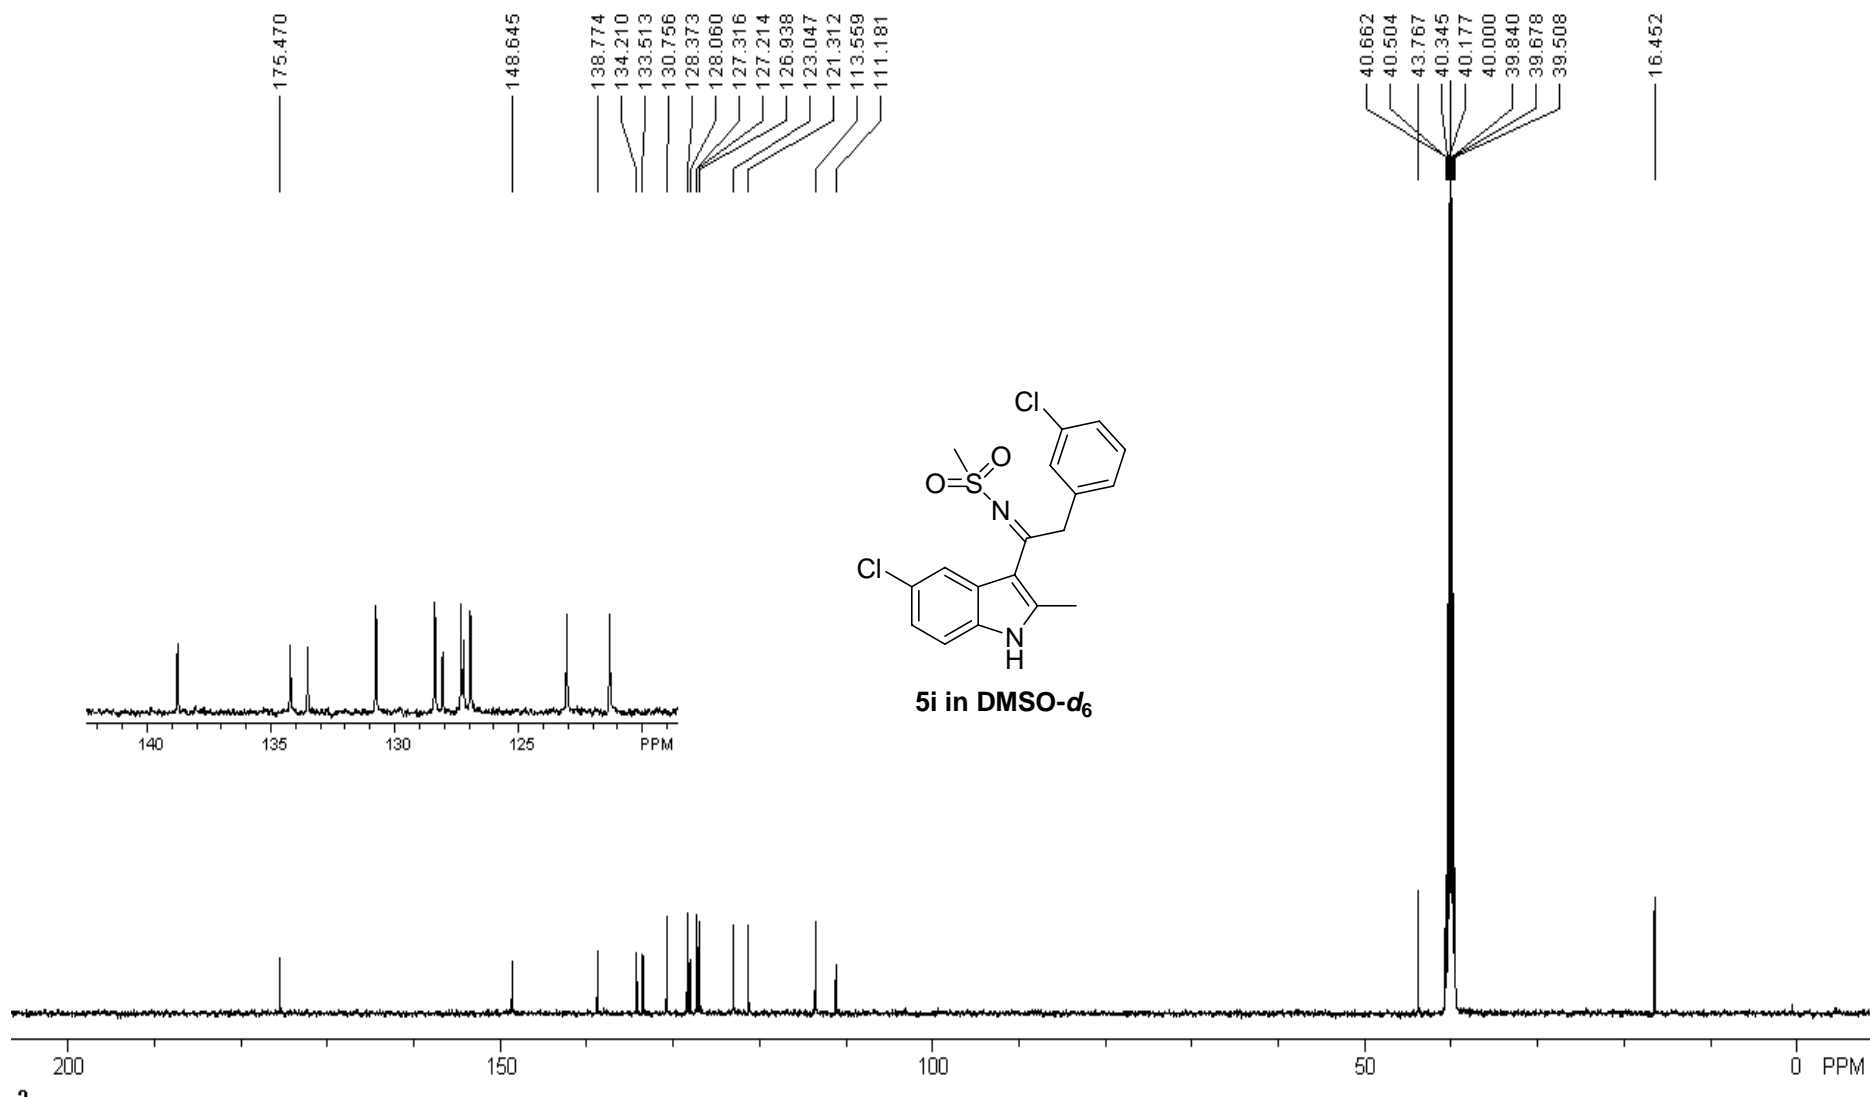

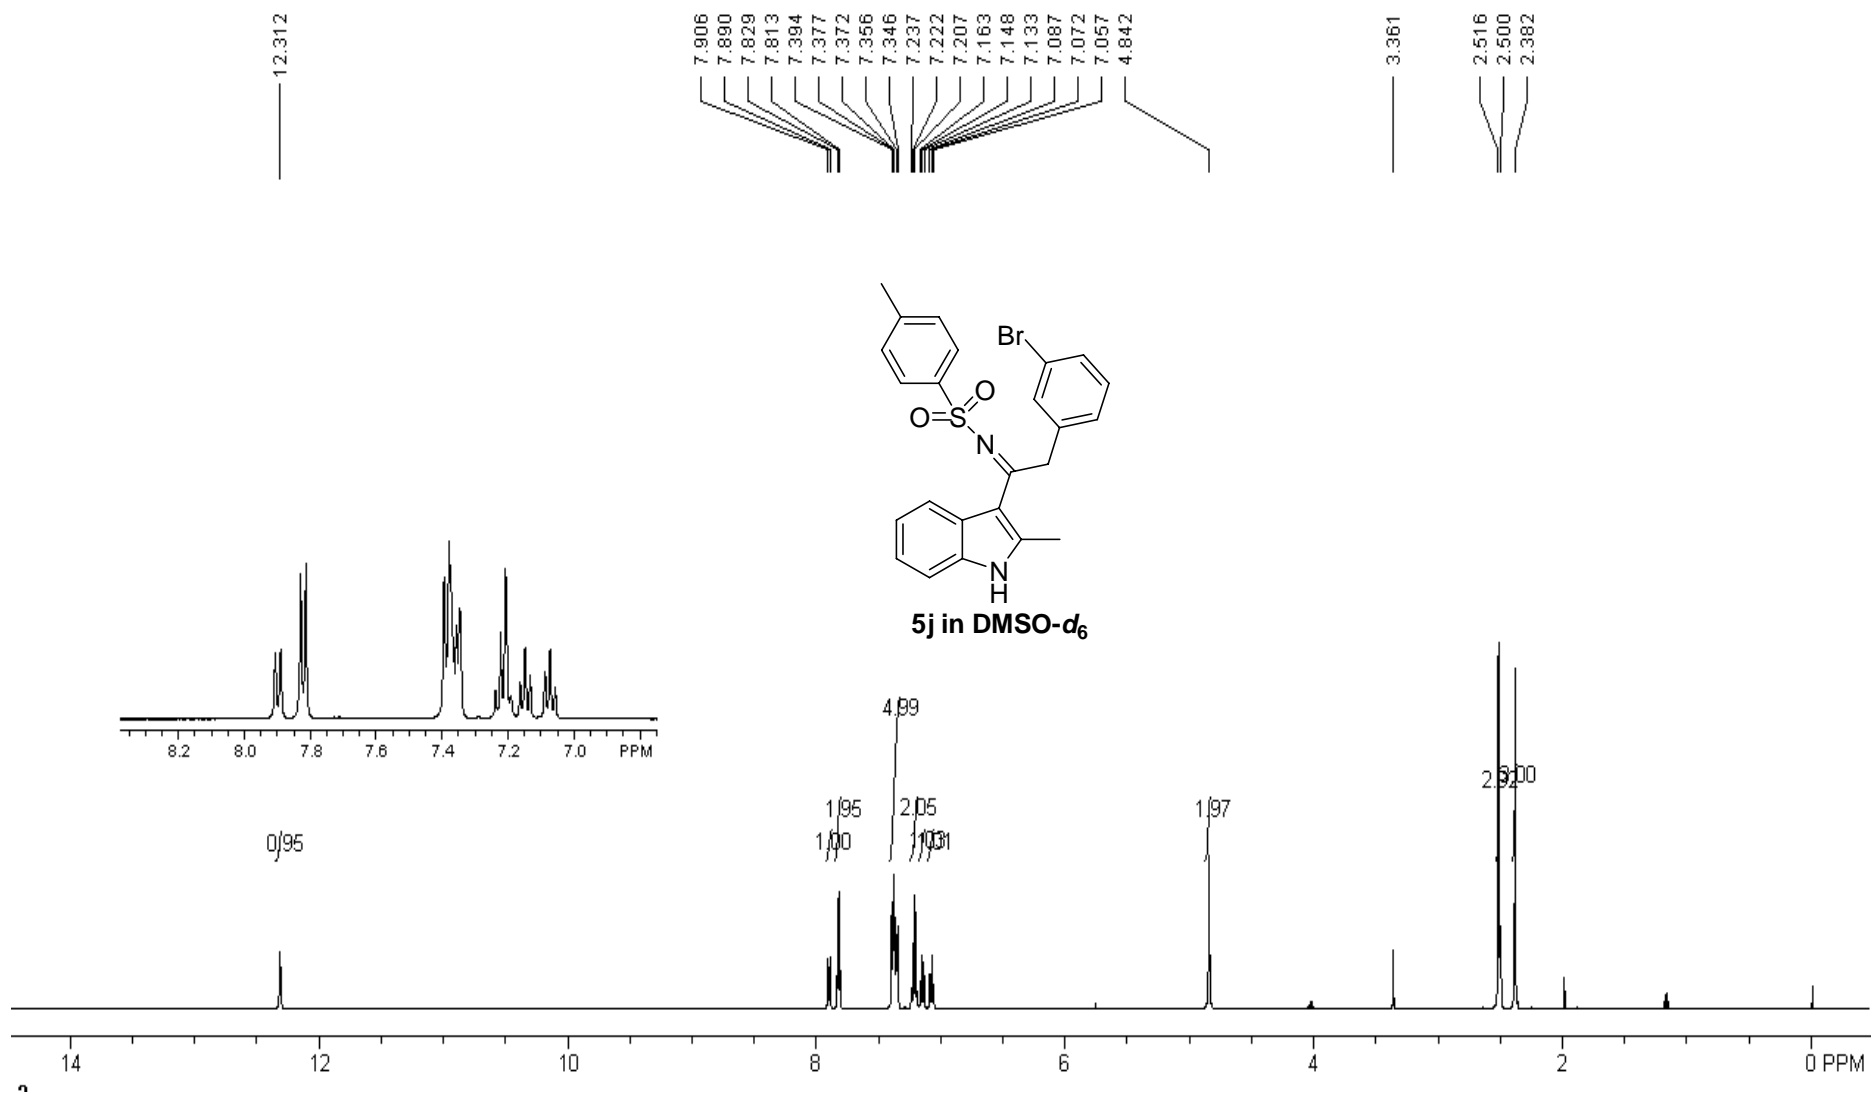

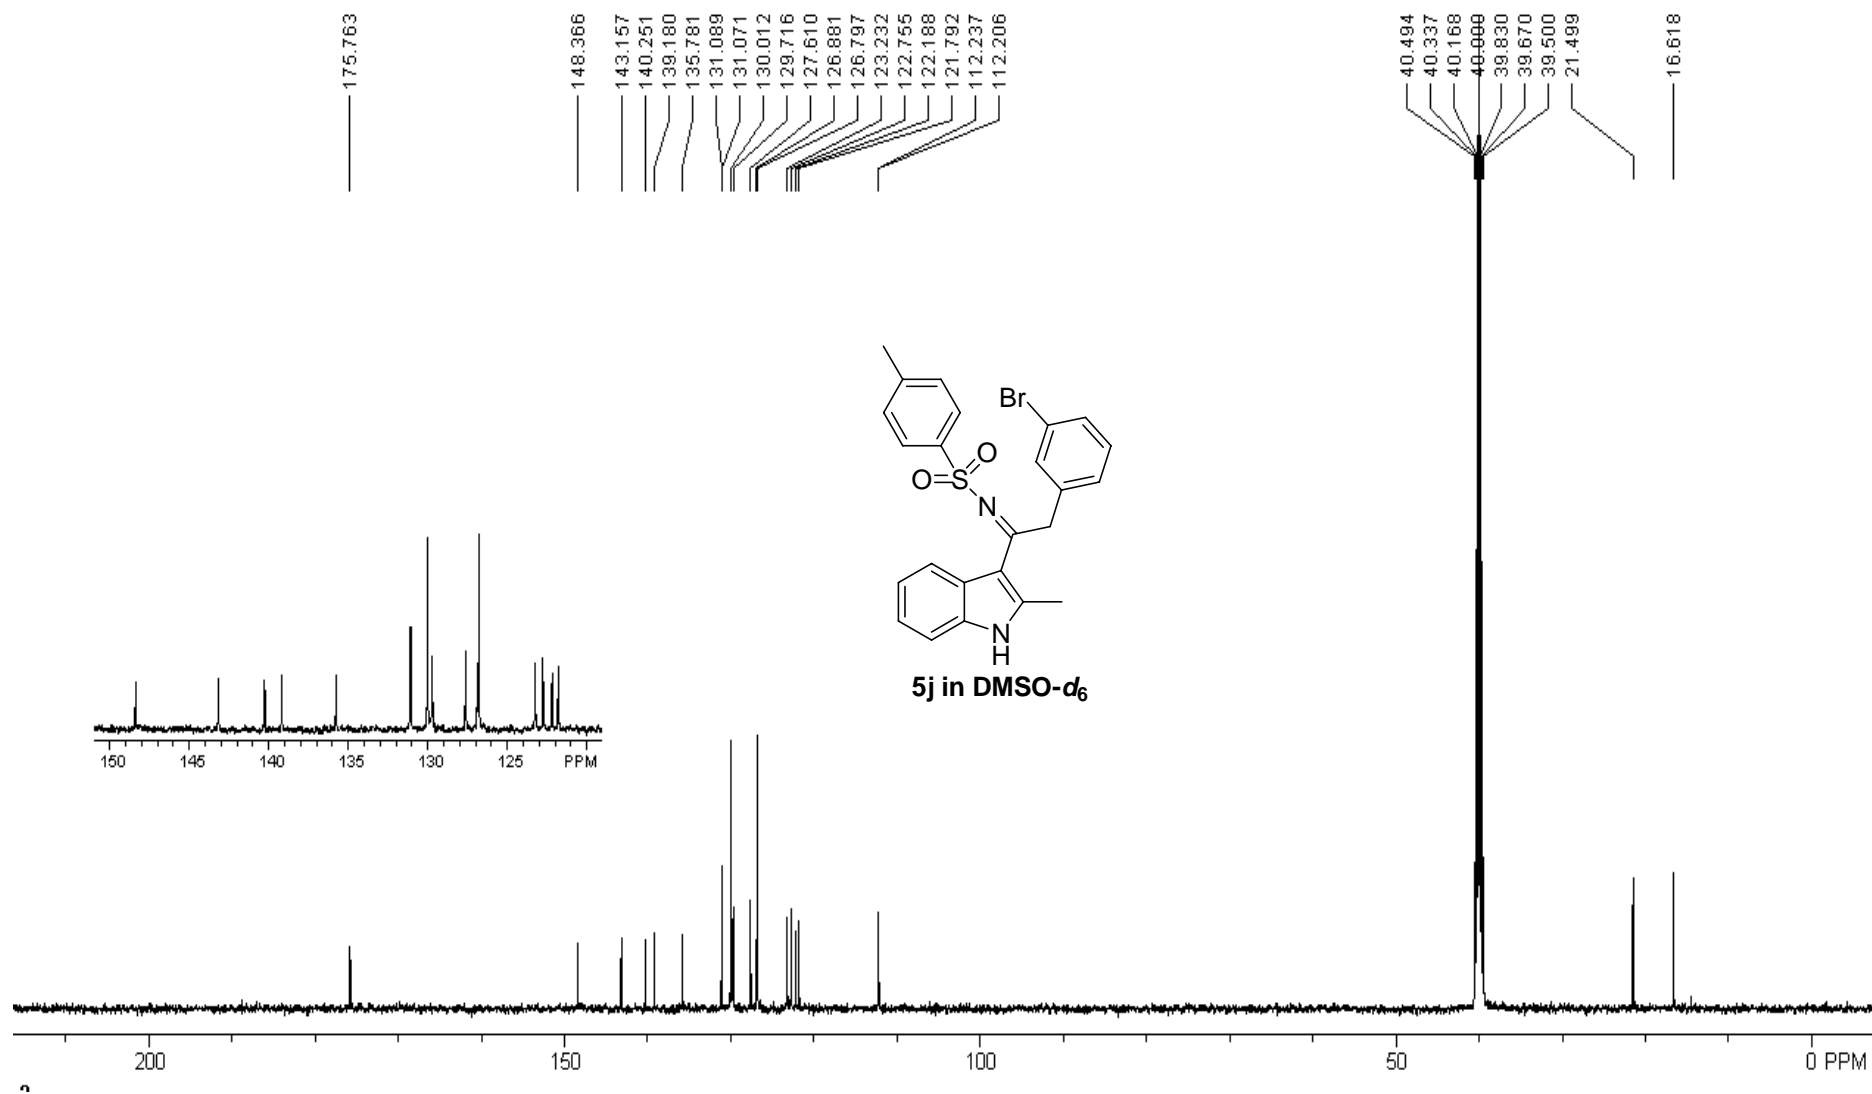

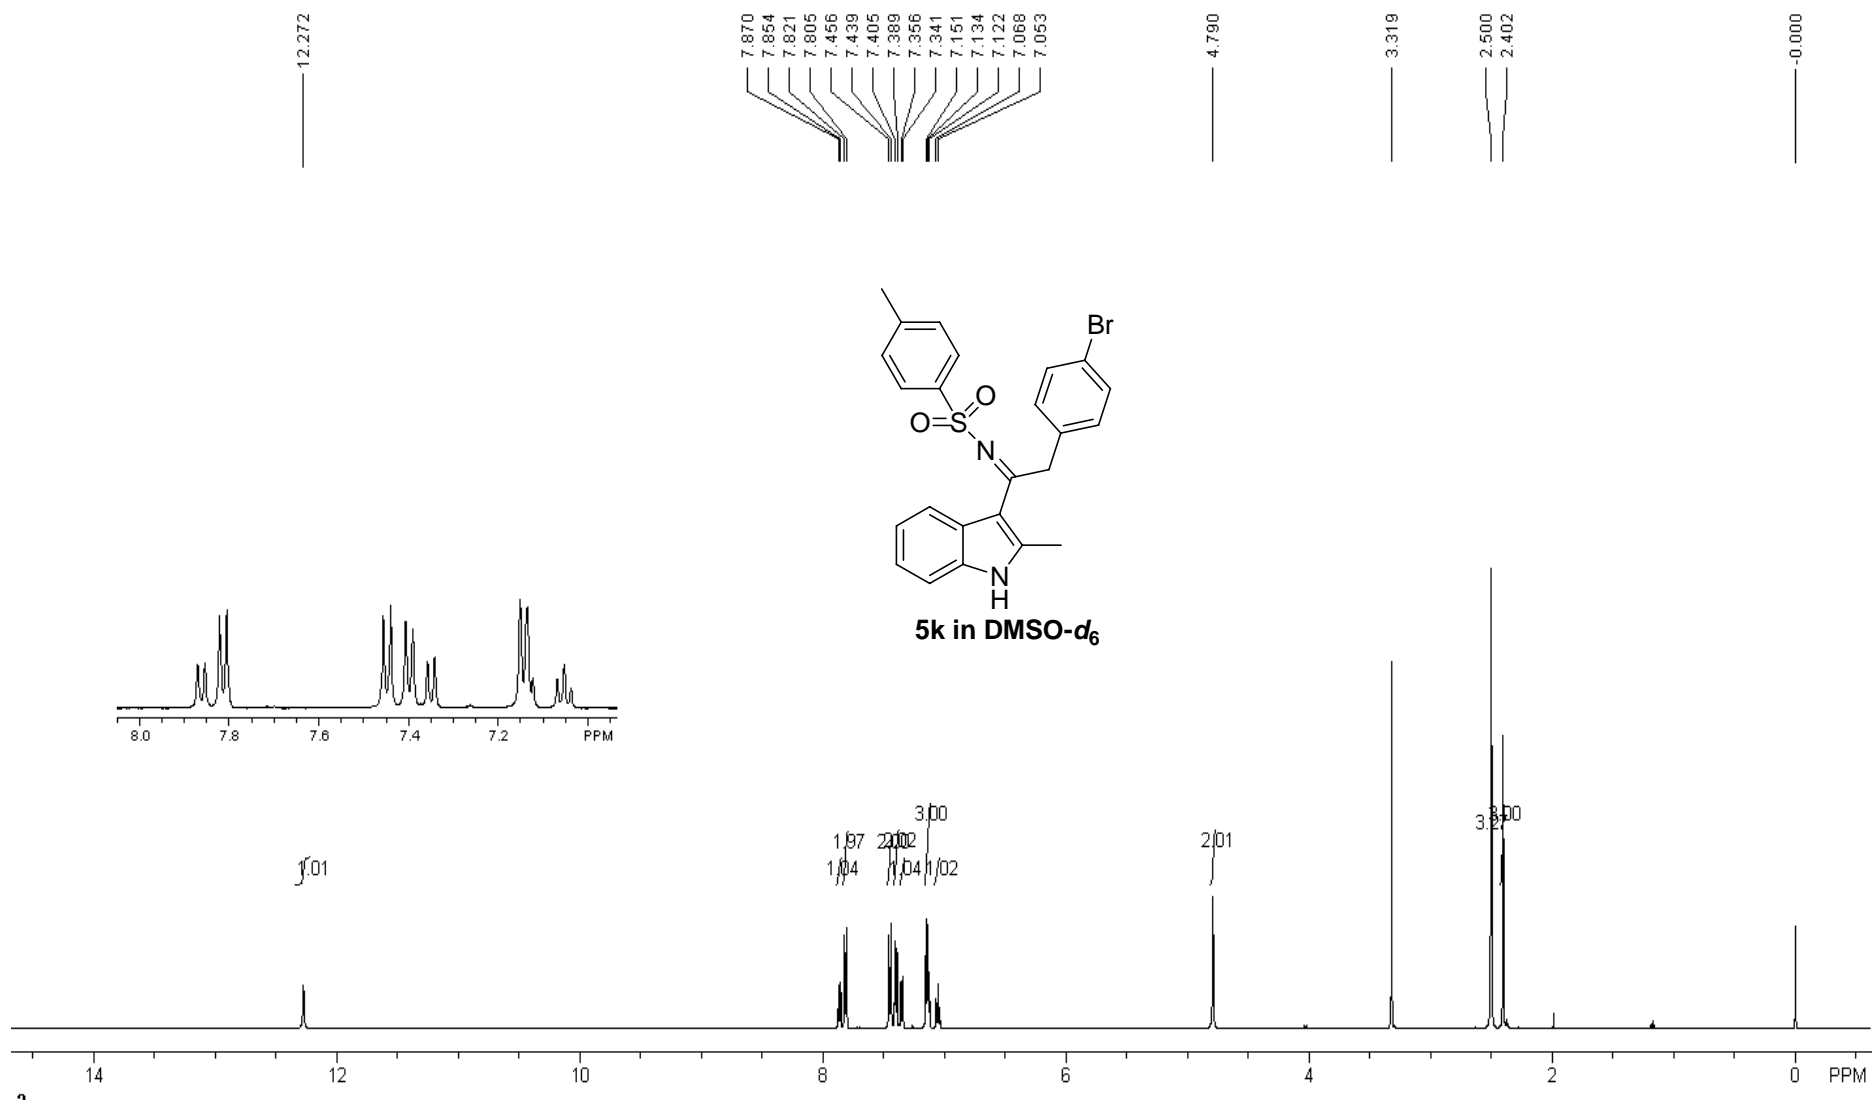

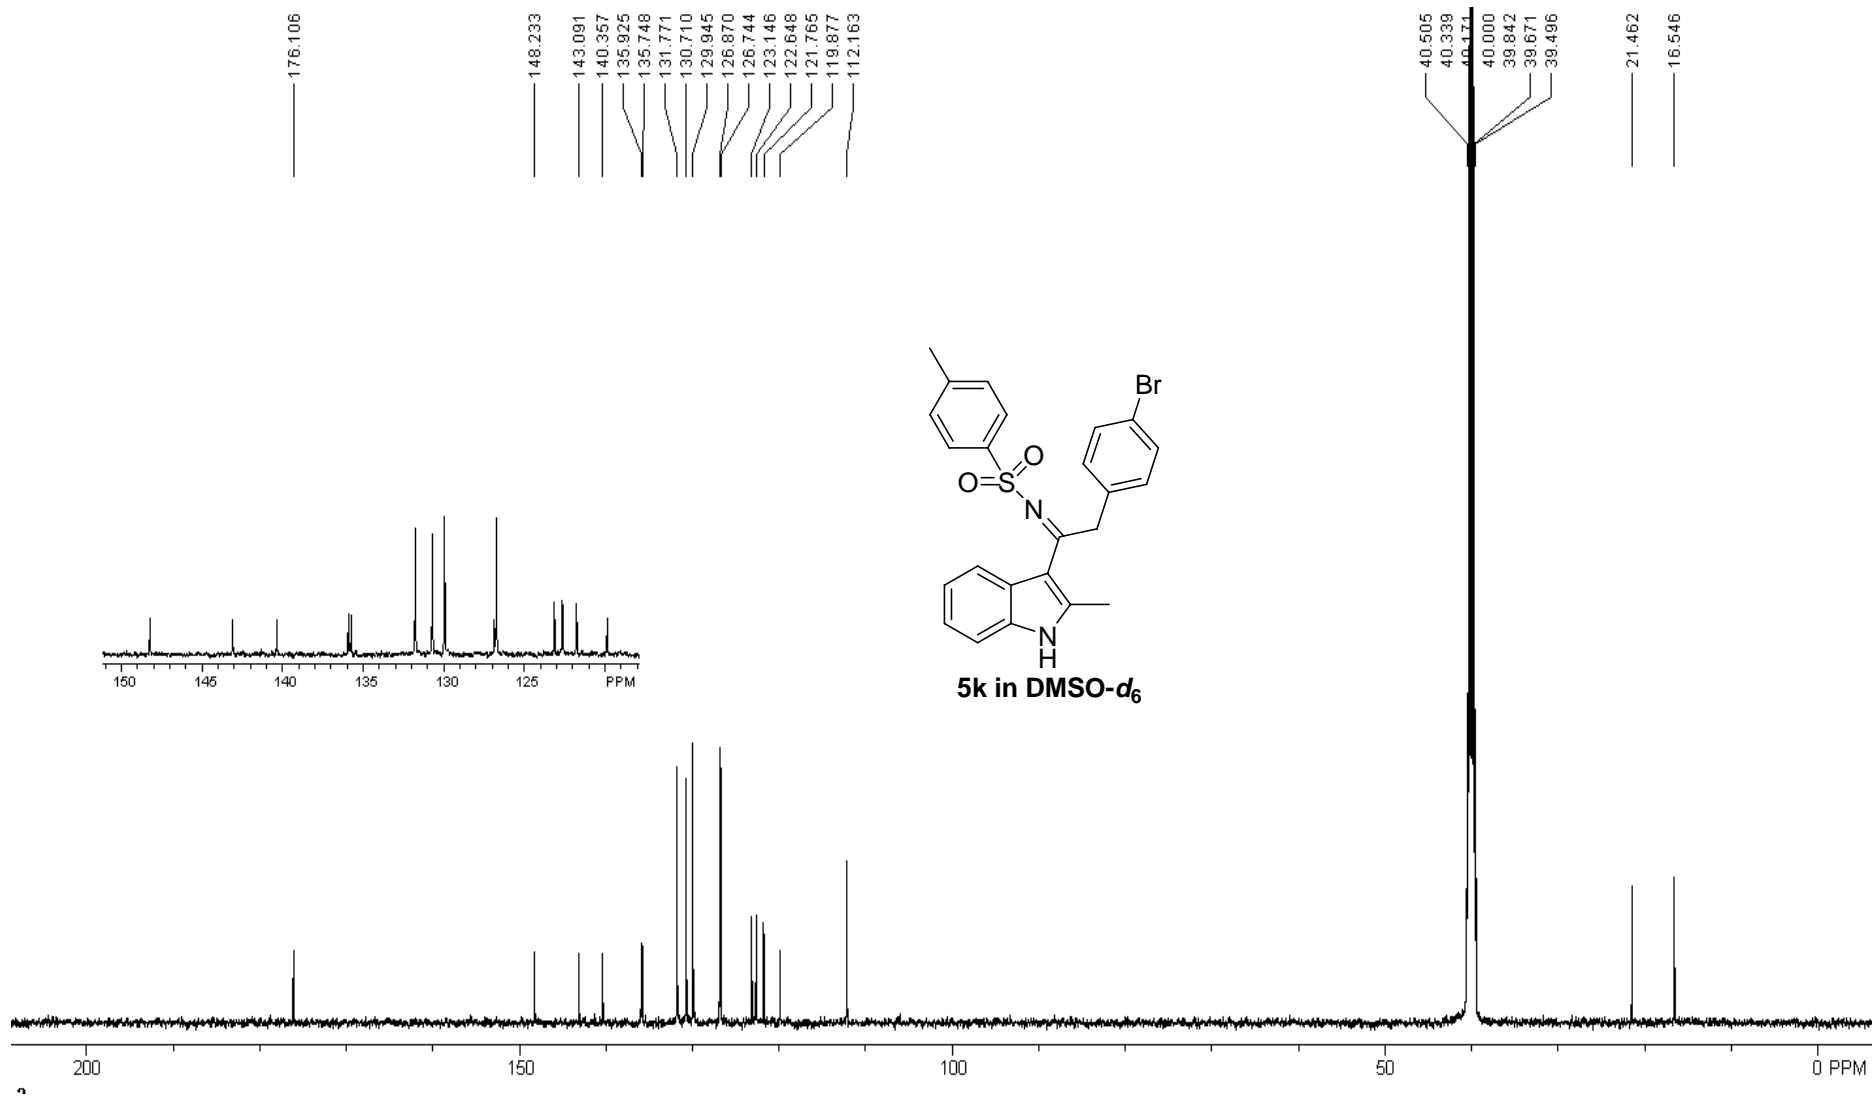

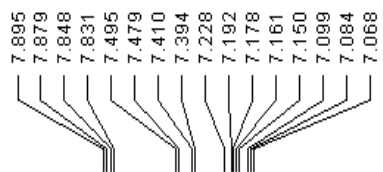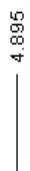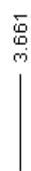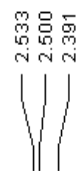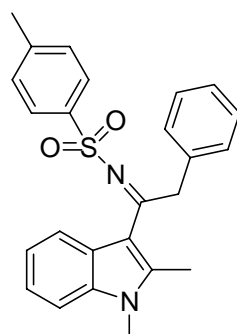

5l in DMSO-*d*<sub>6</sub>

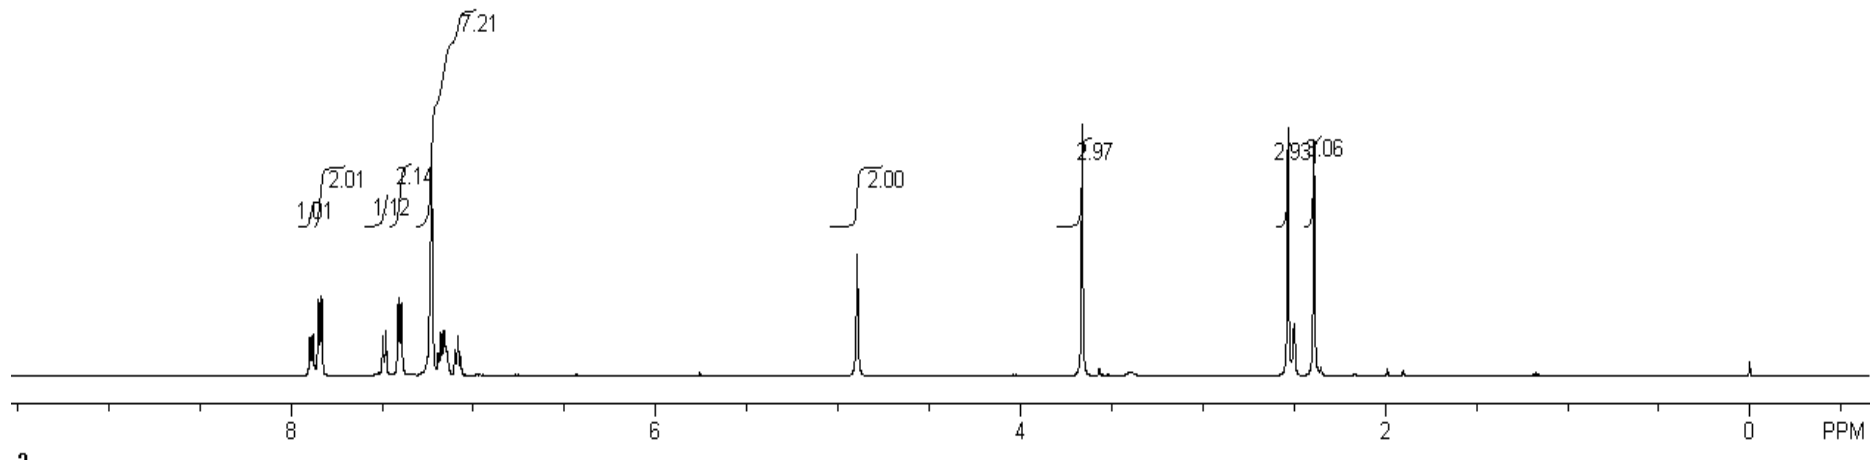

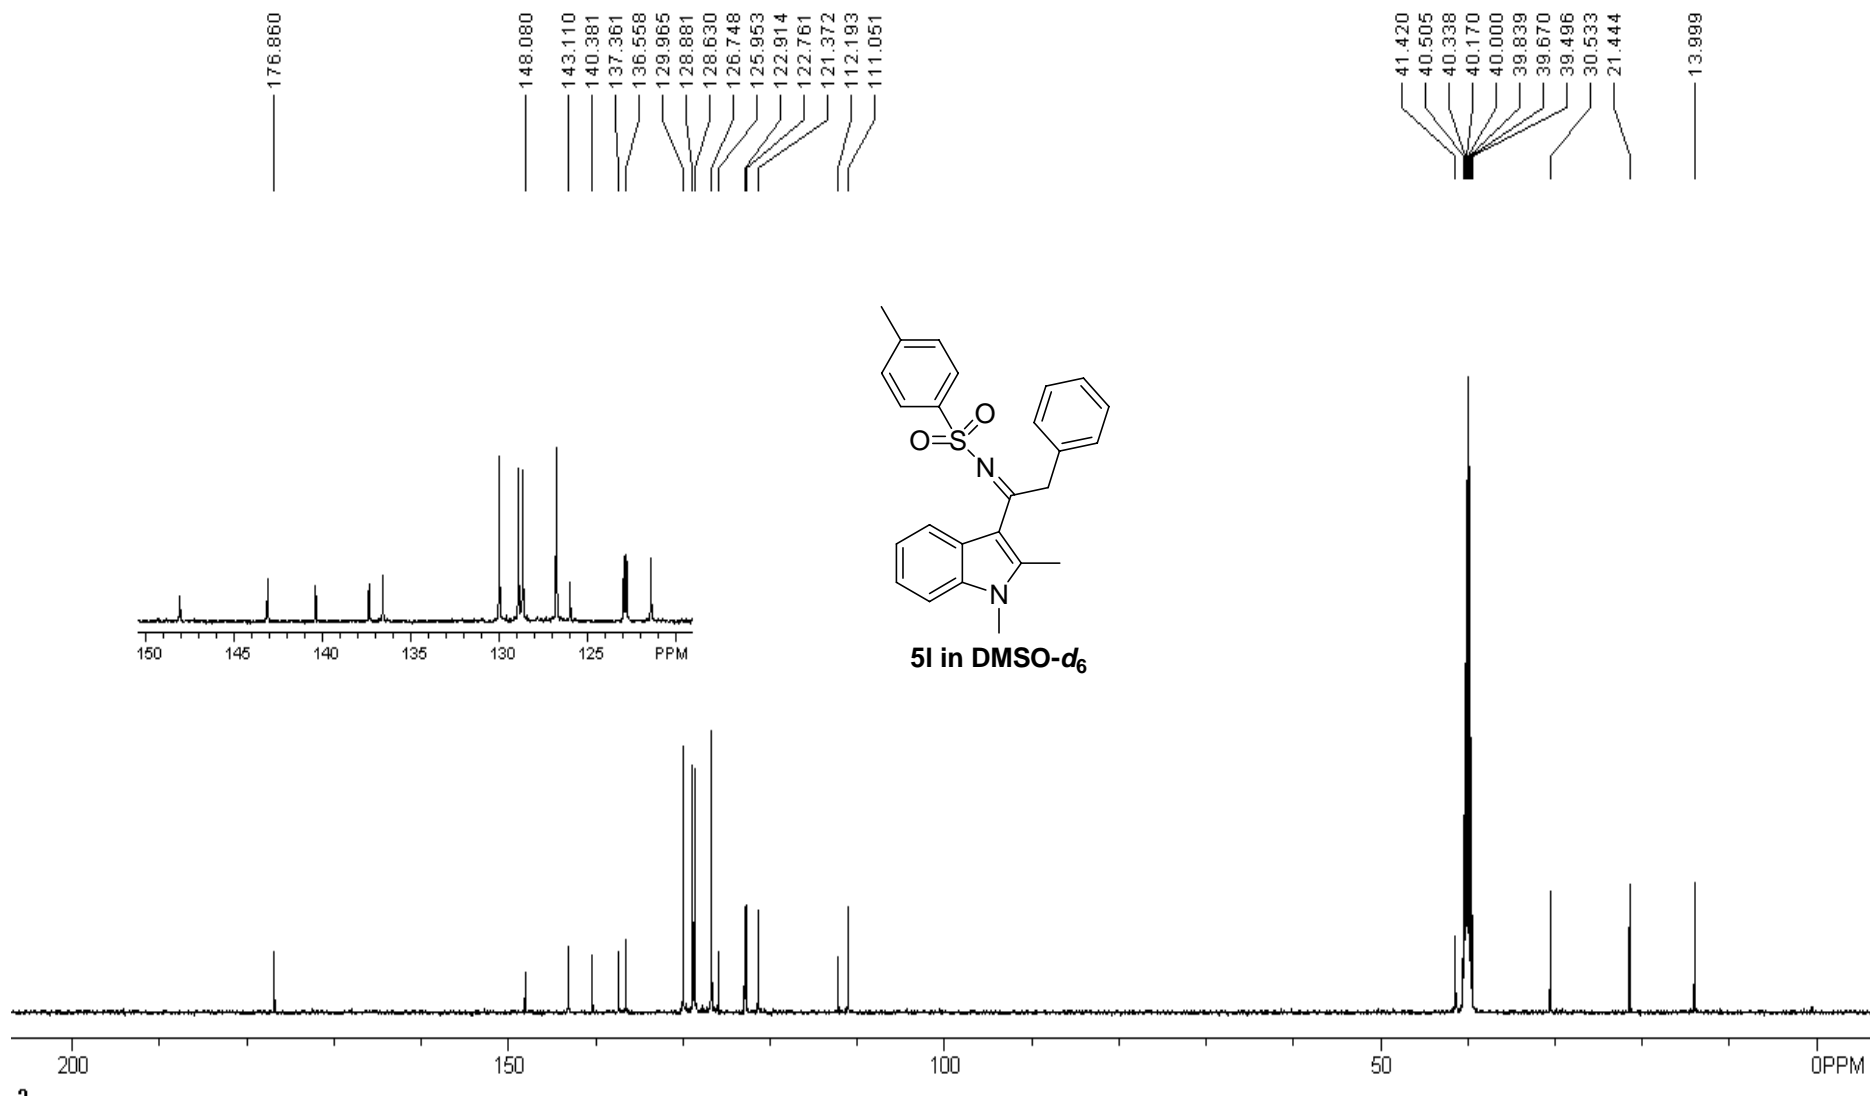

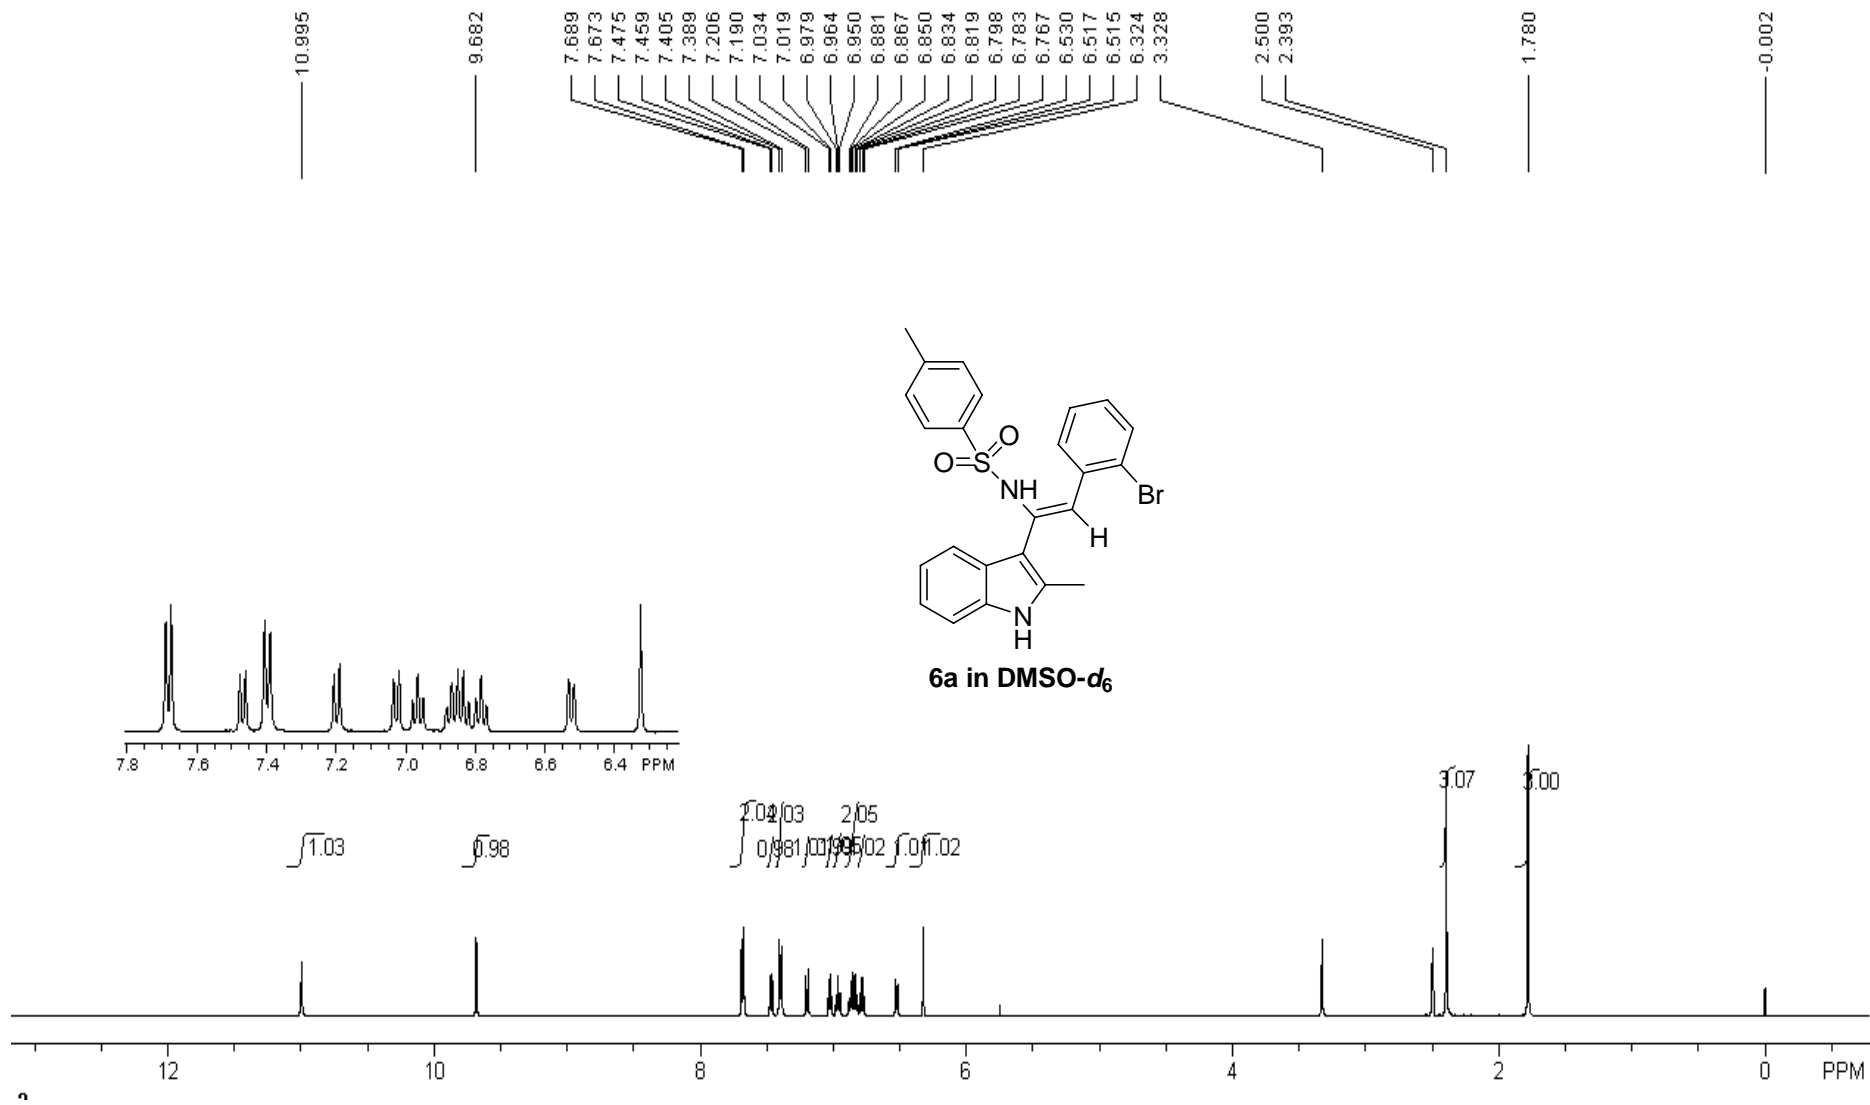



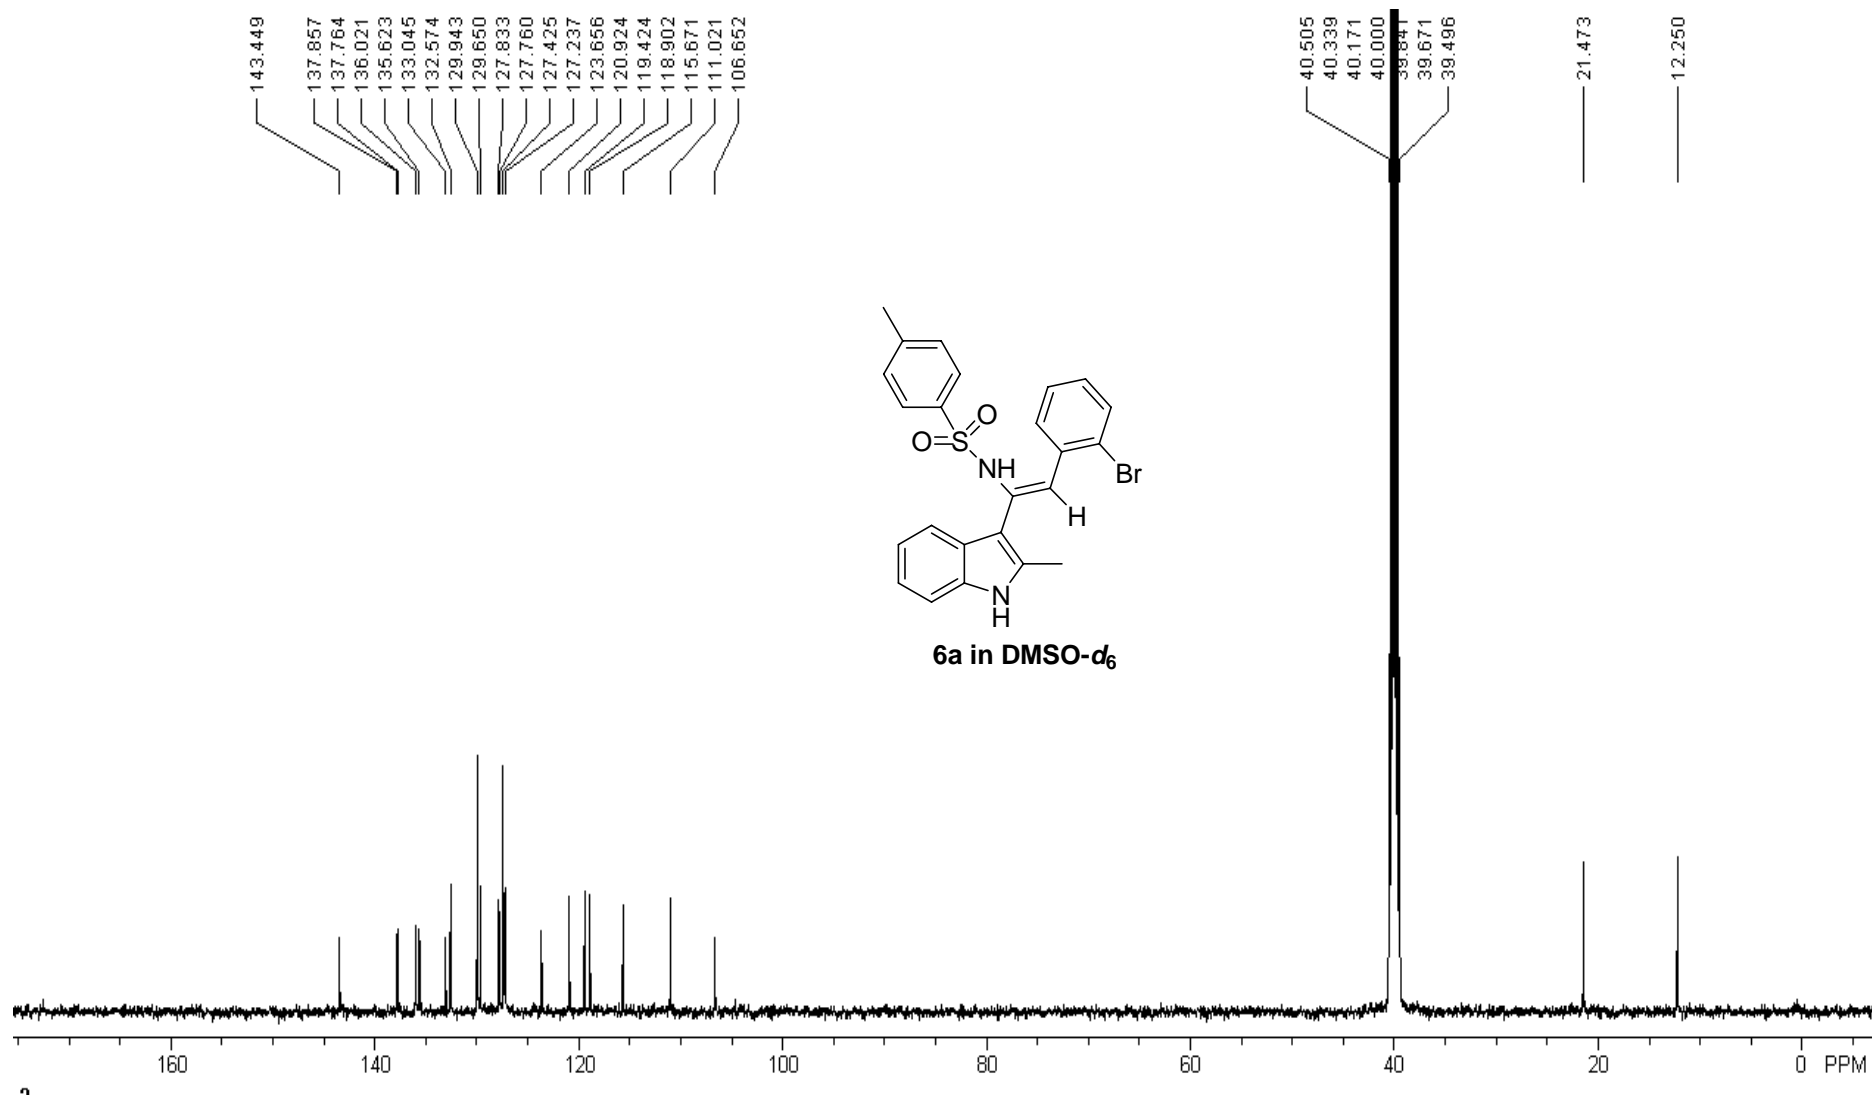

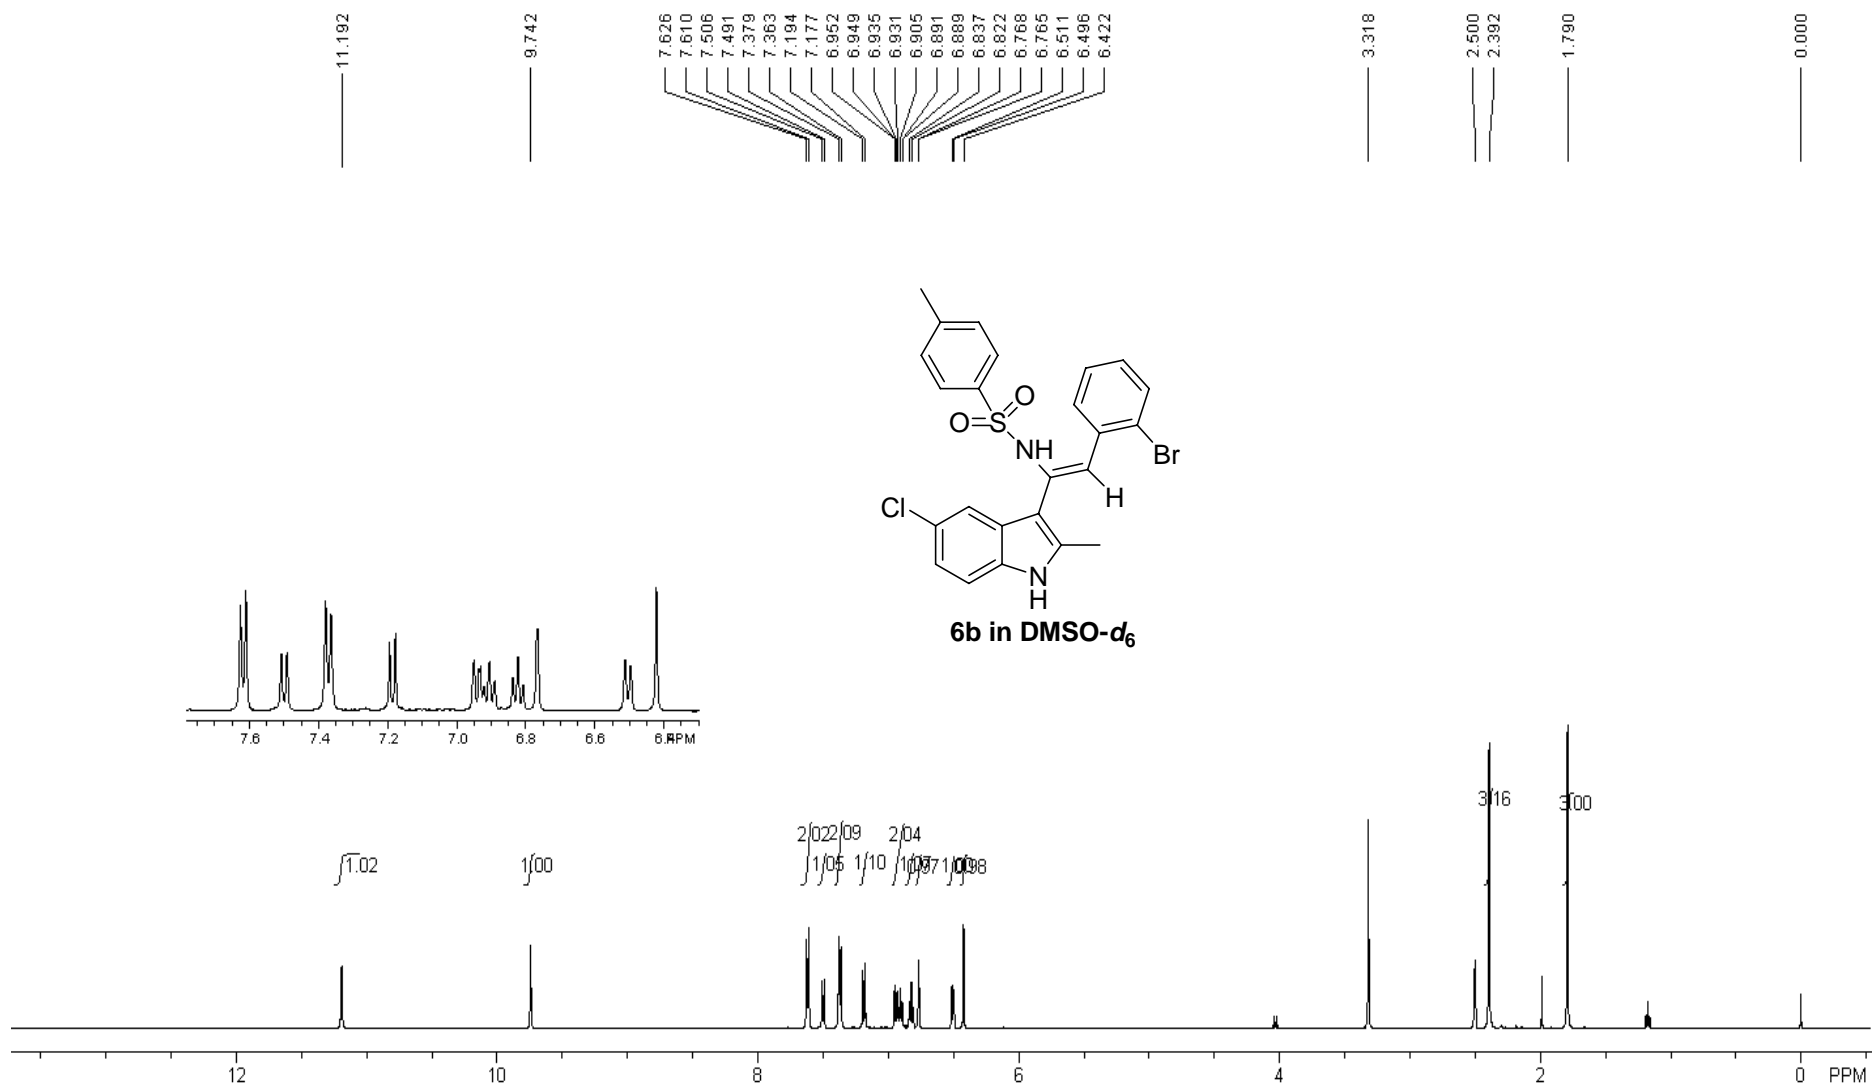

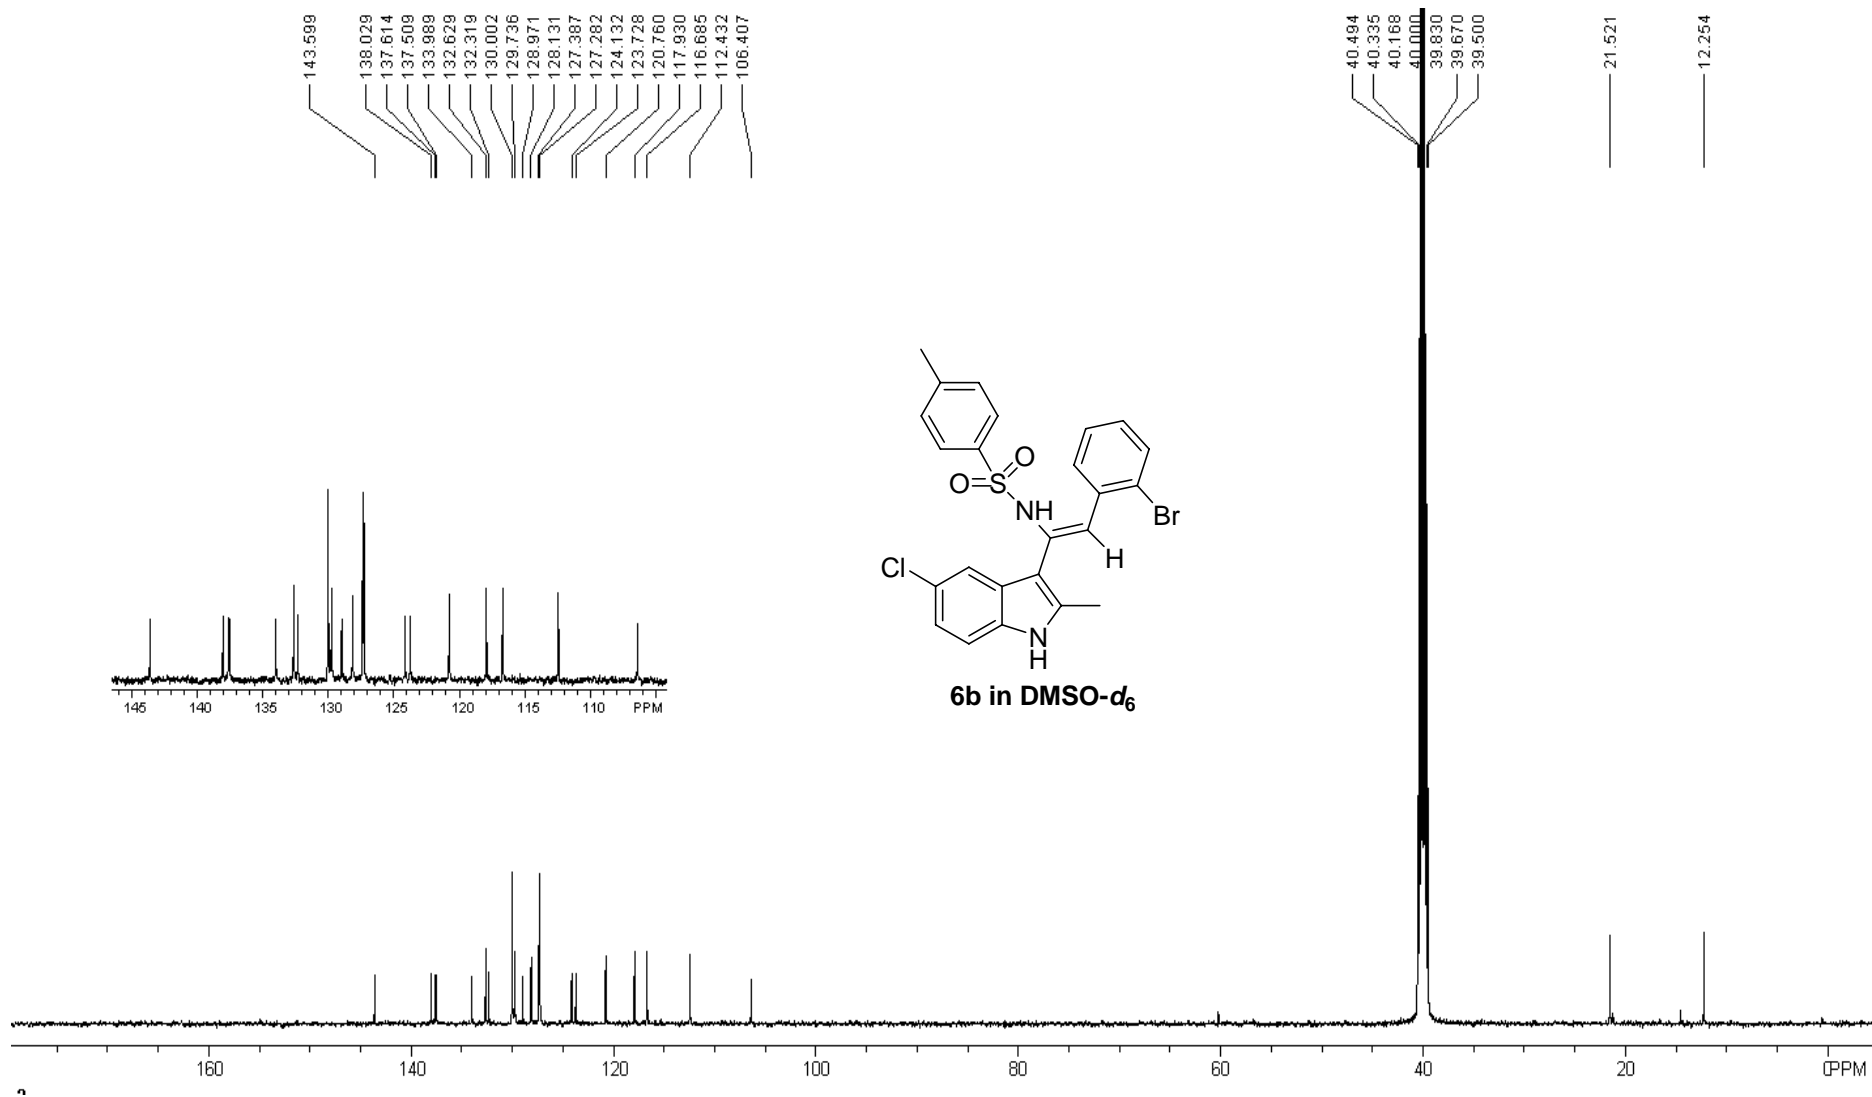

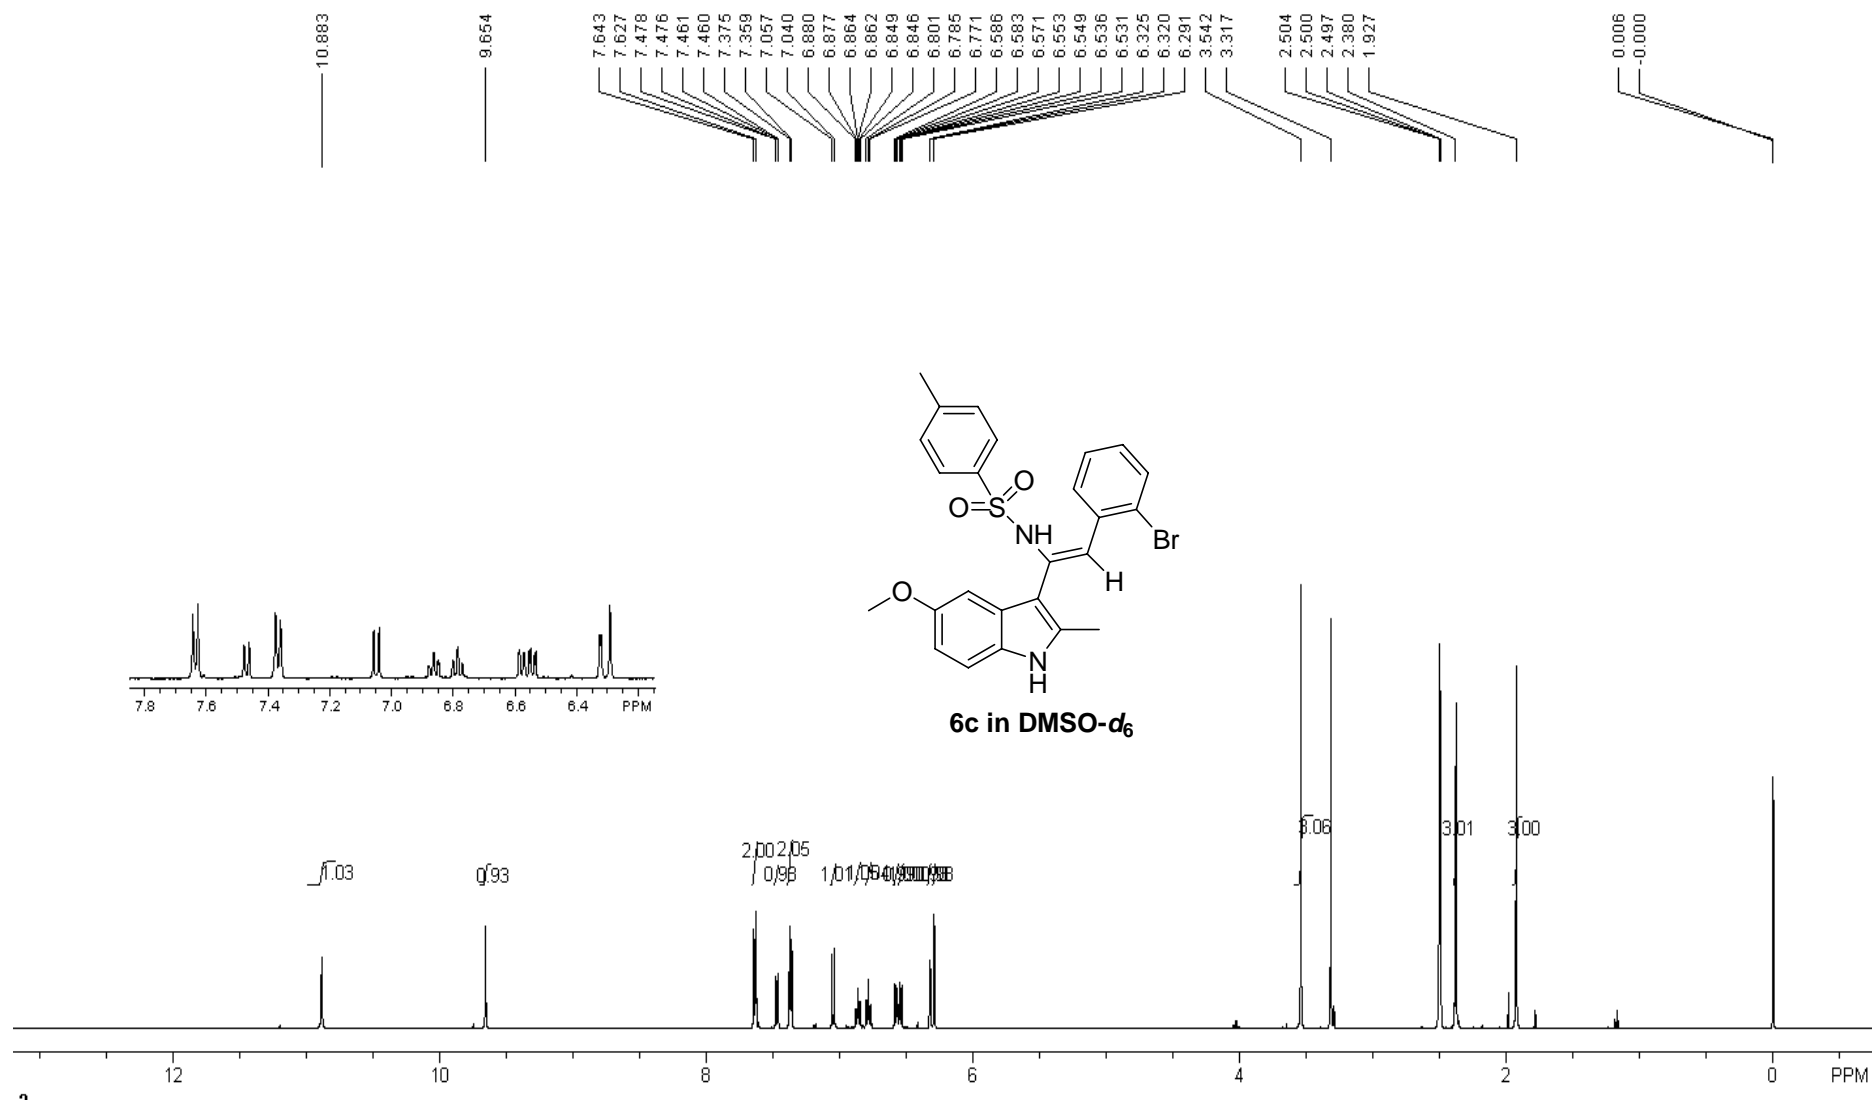

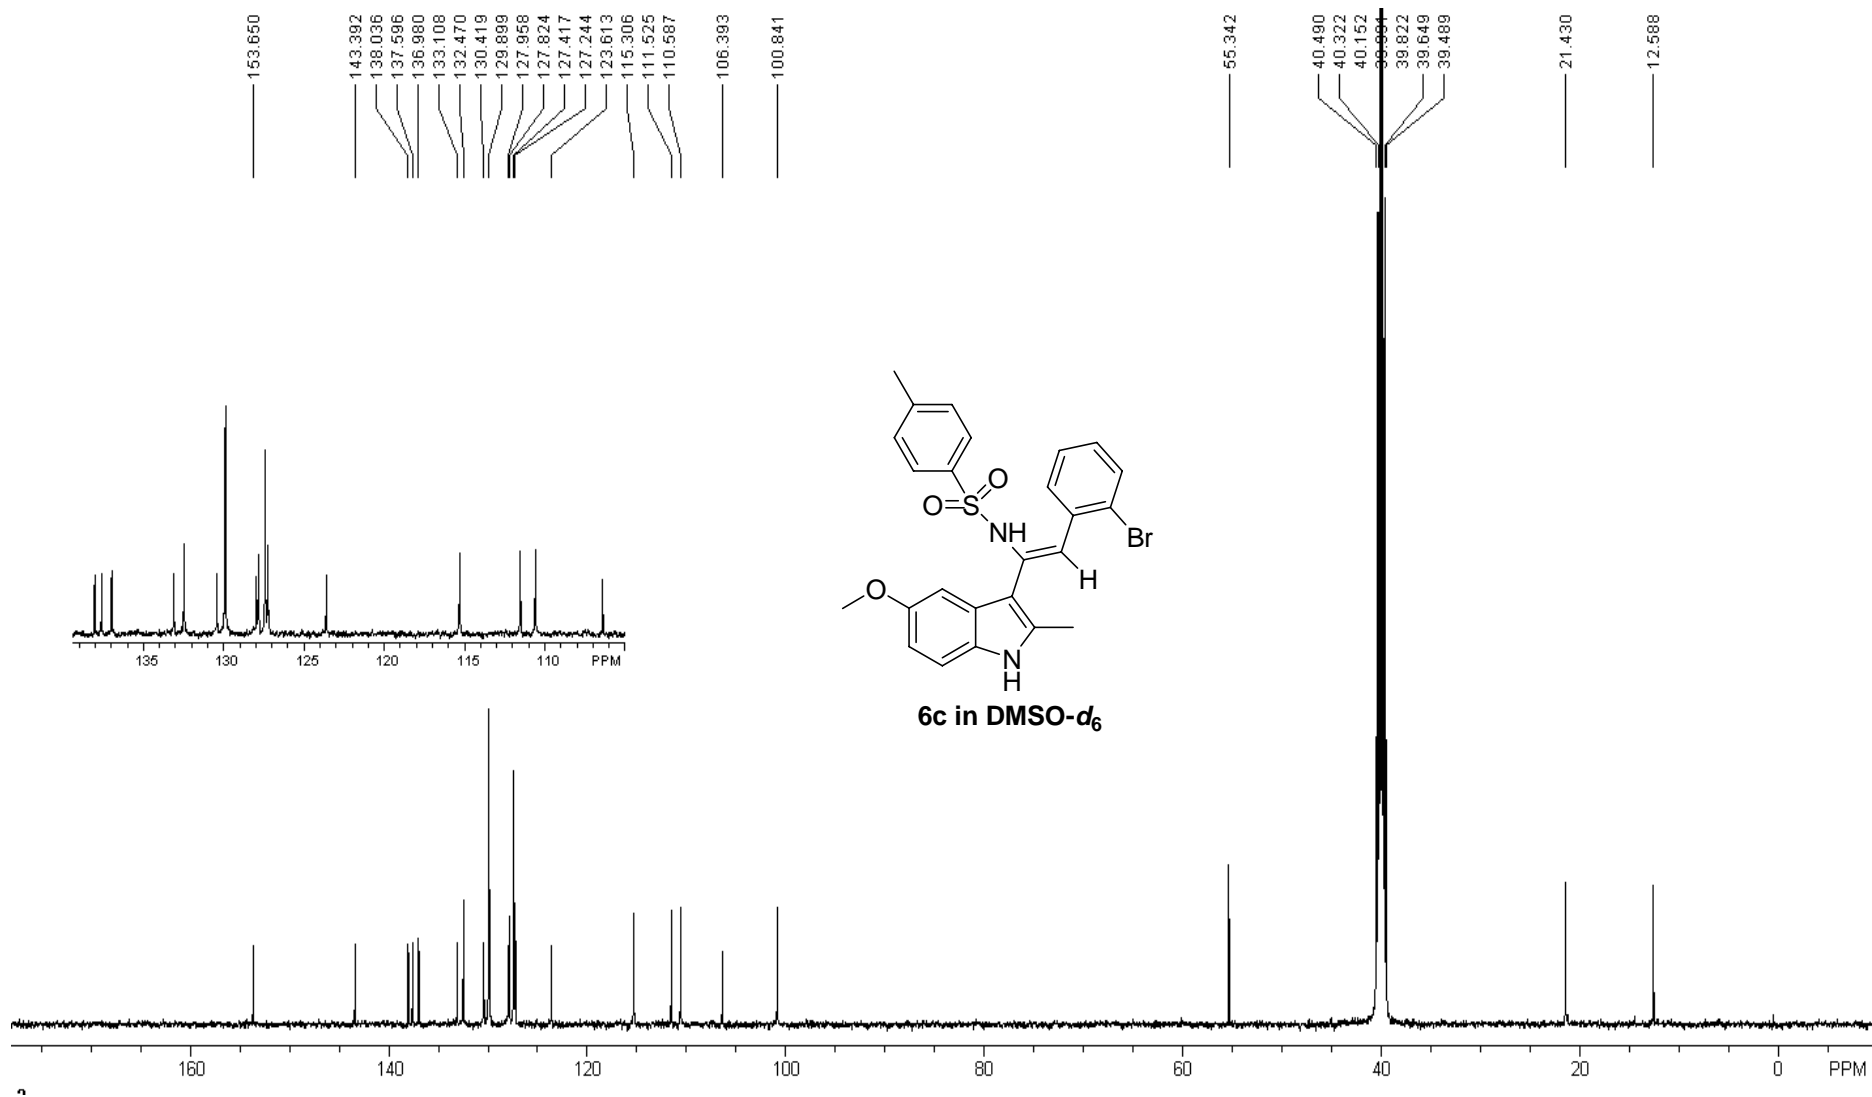

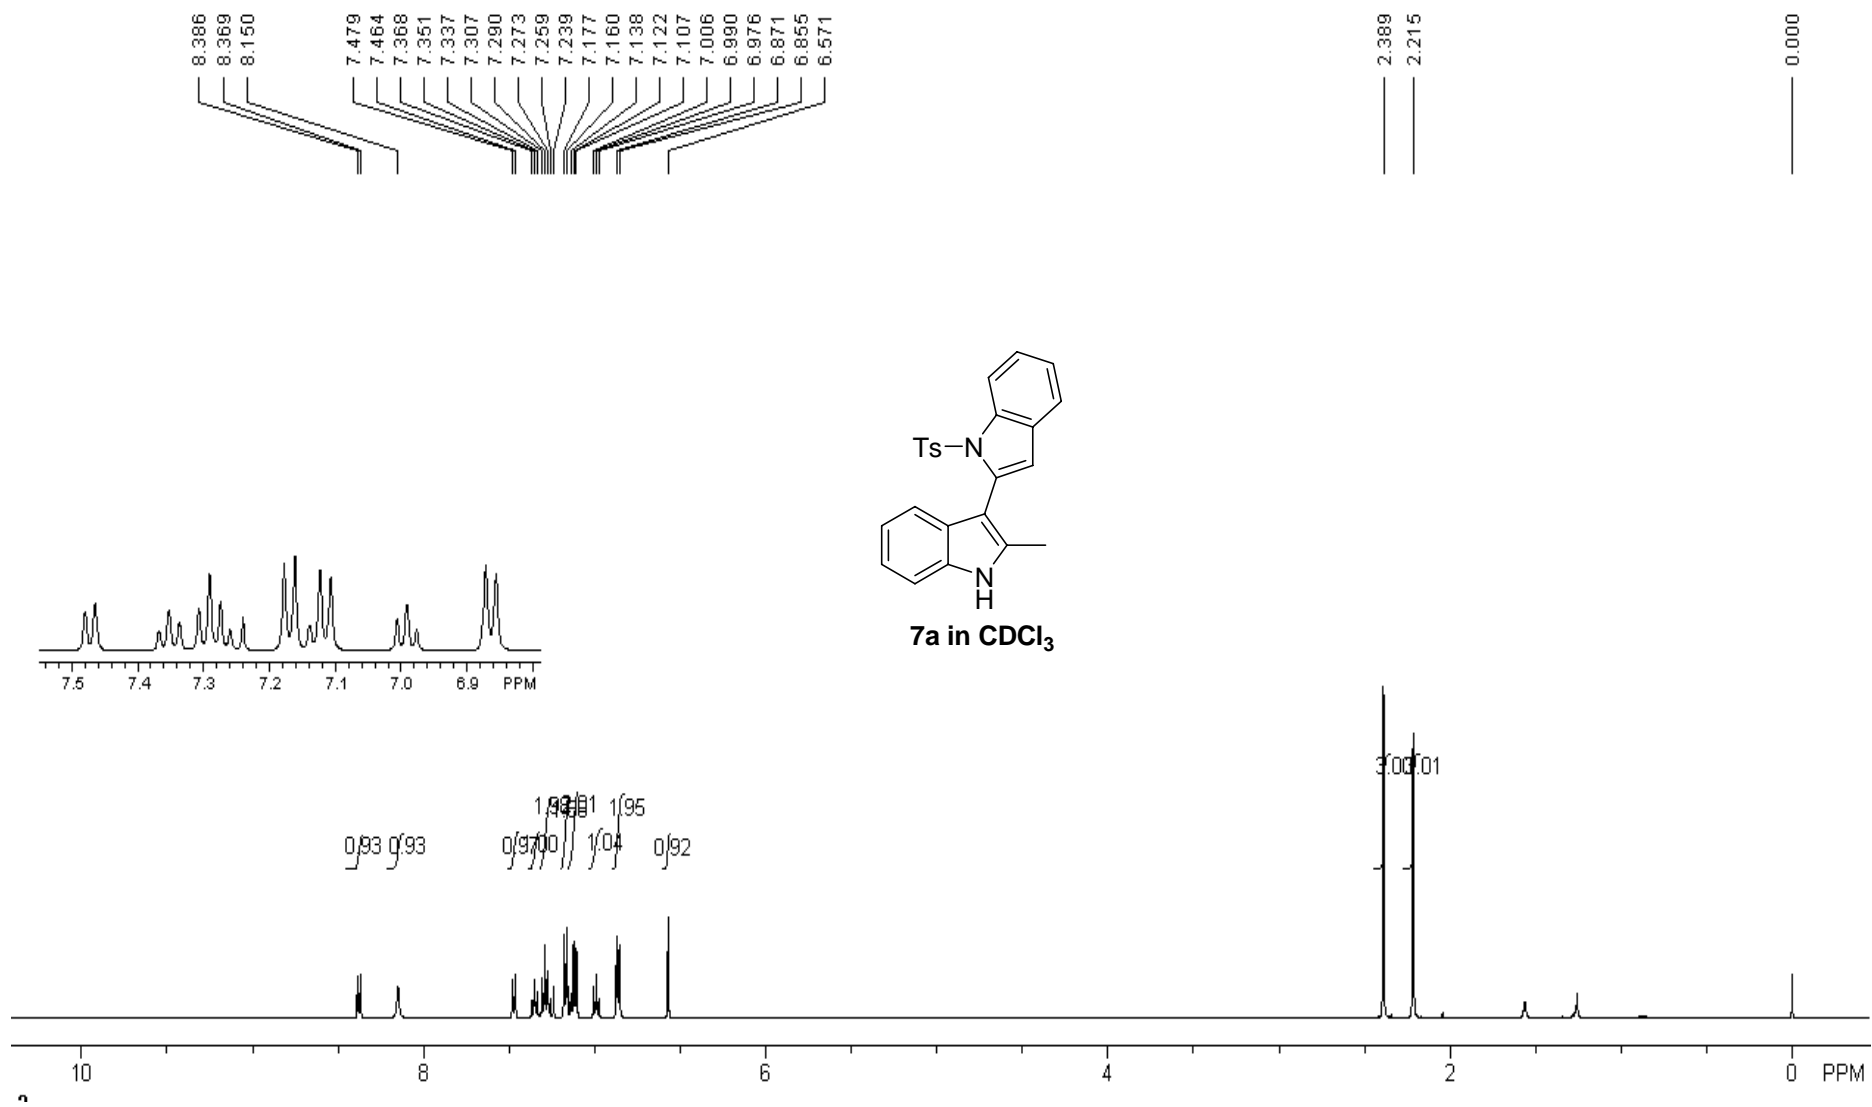

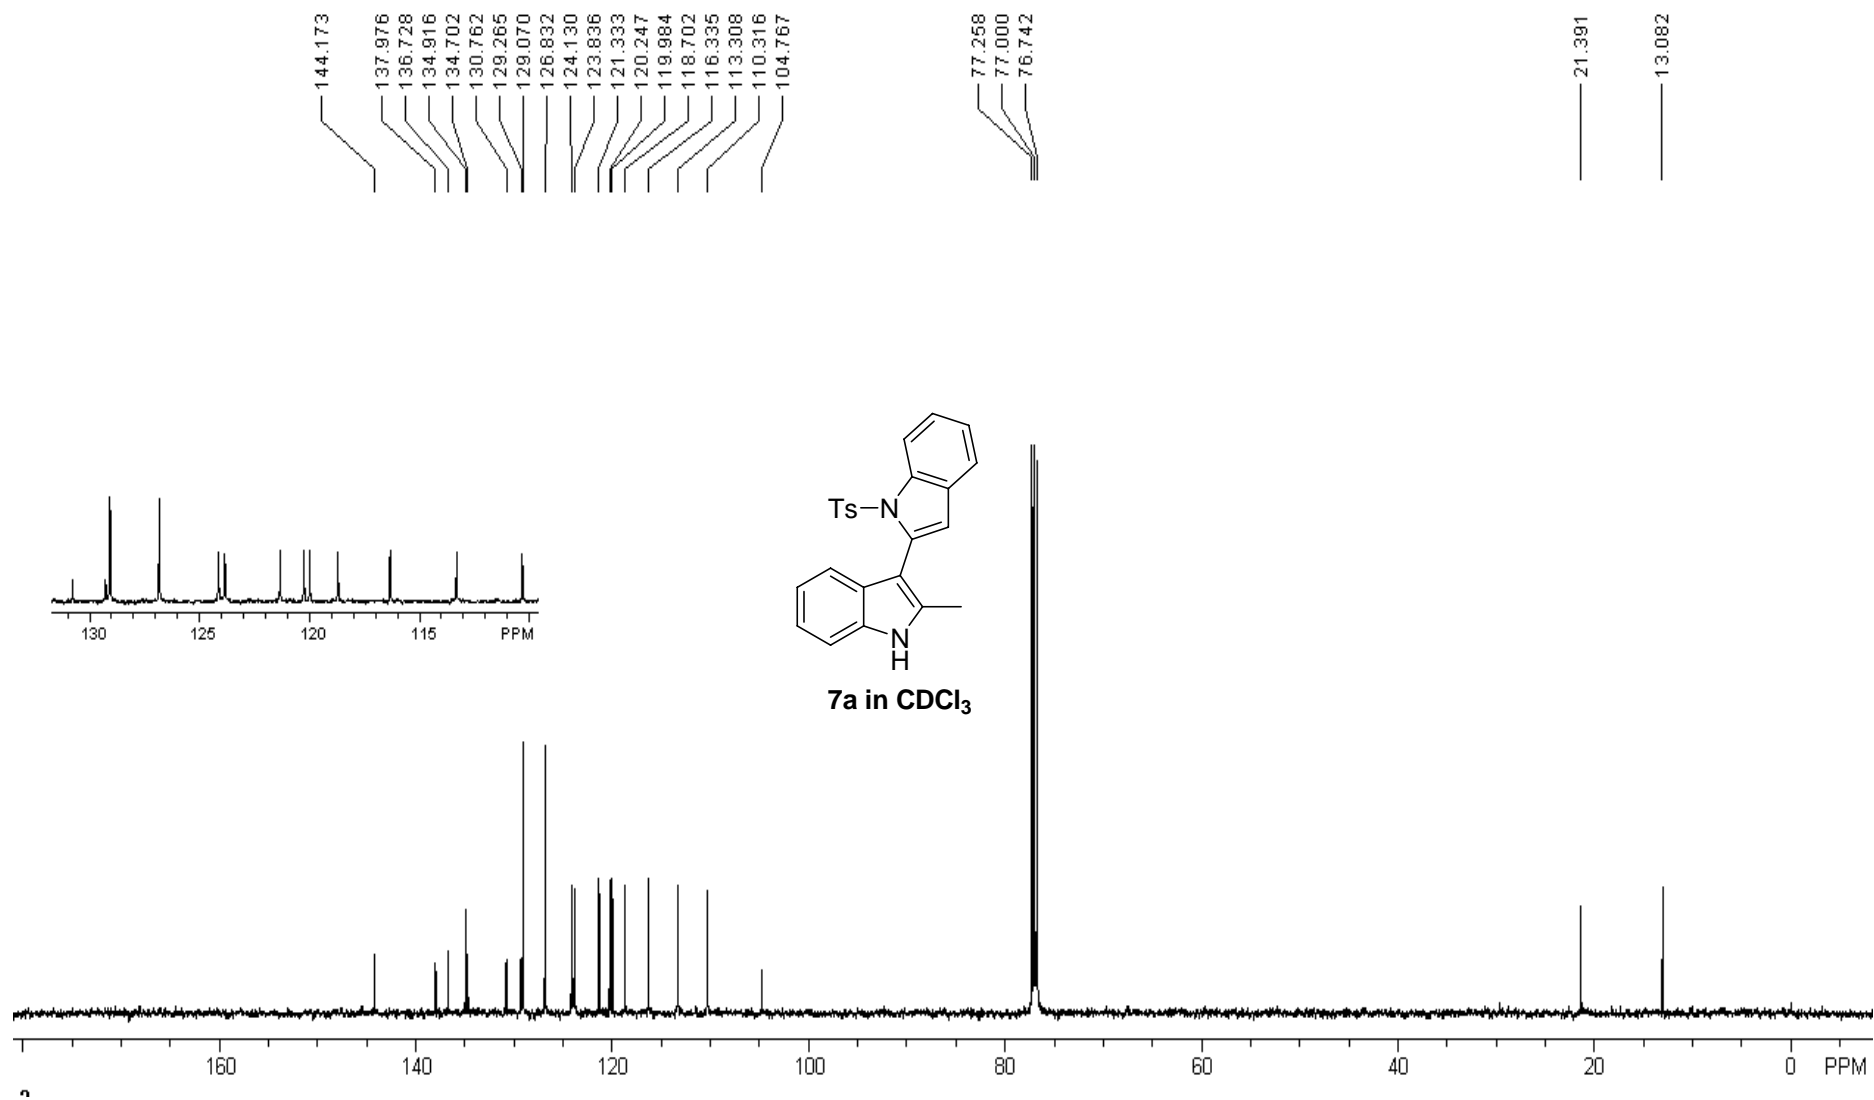

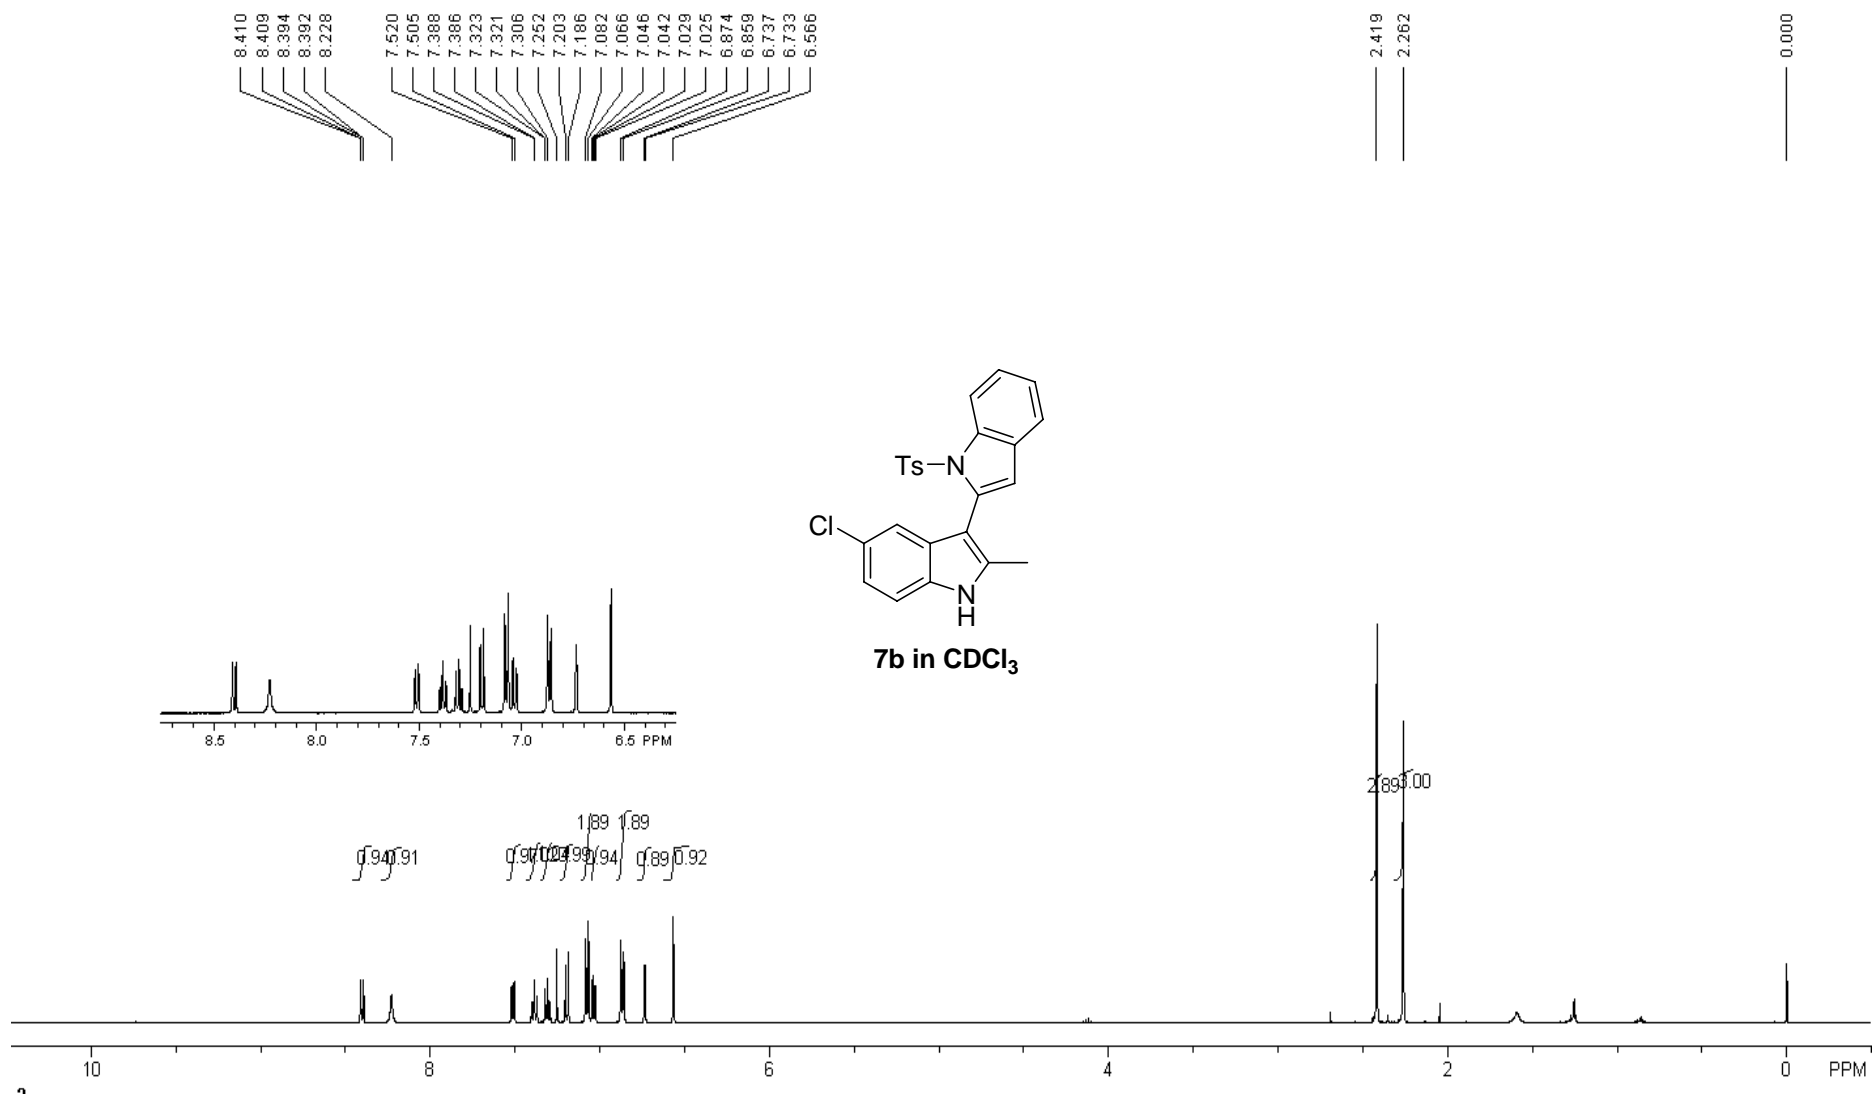



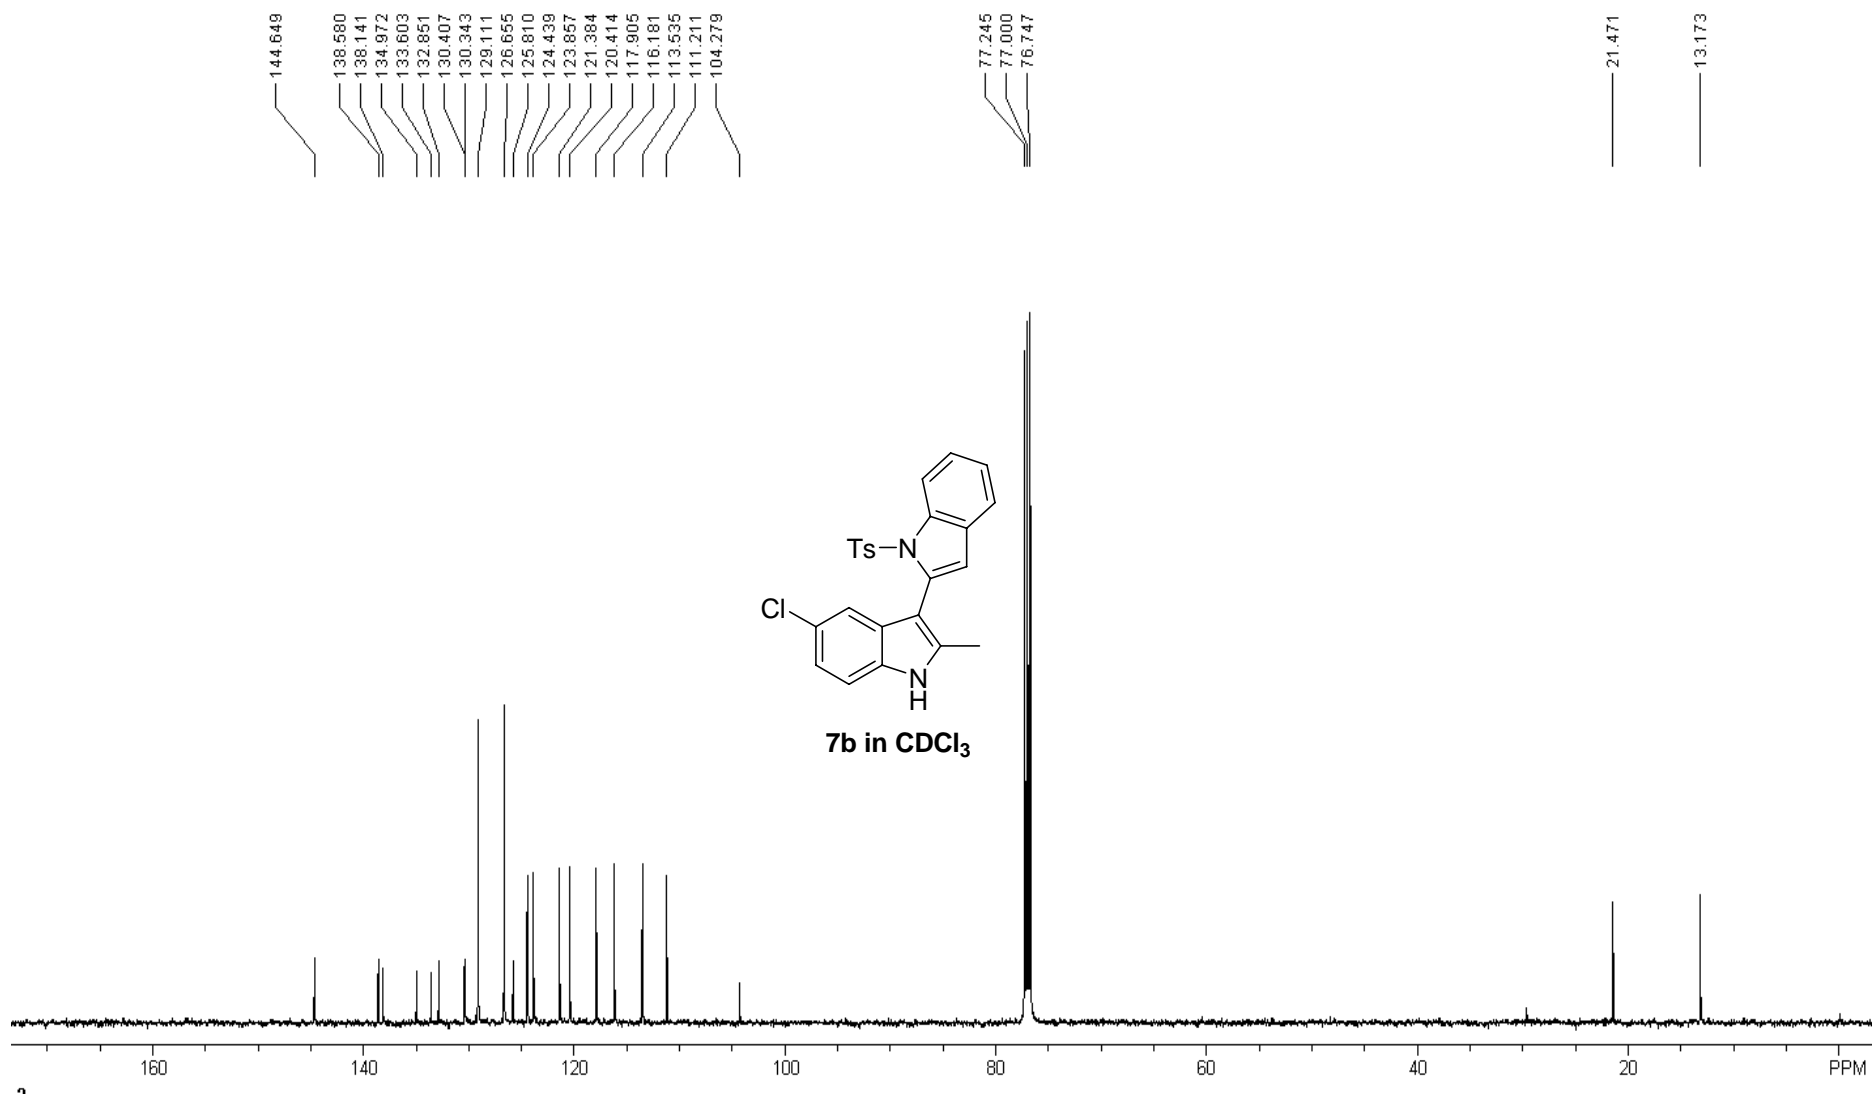

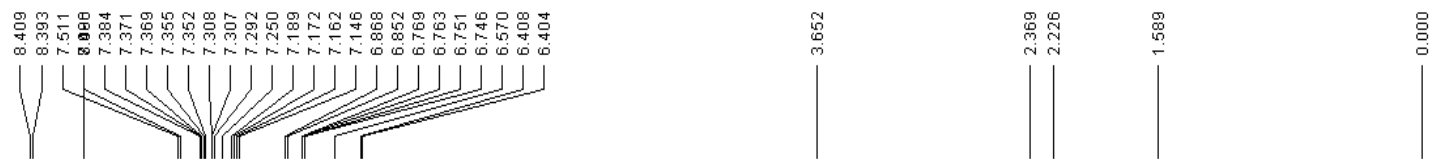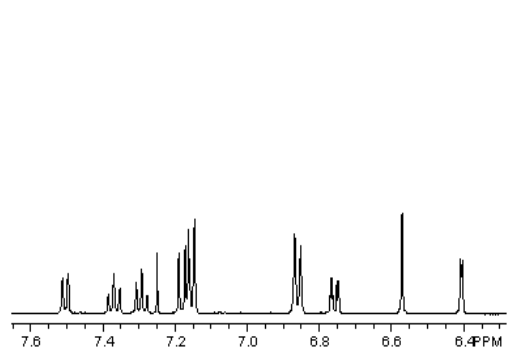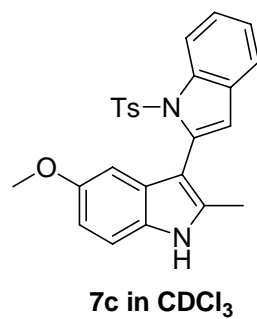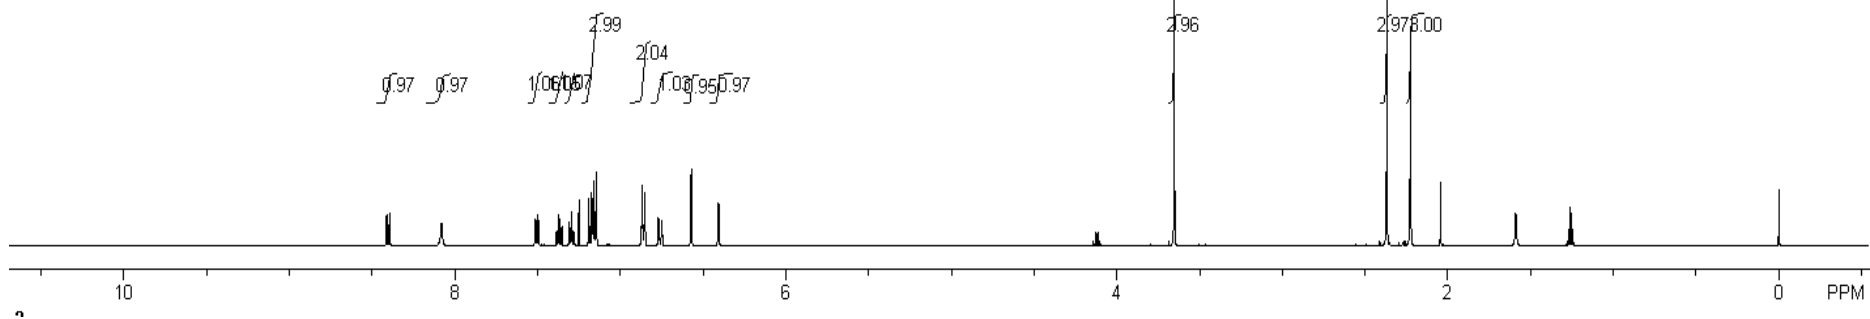

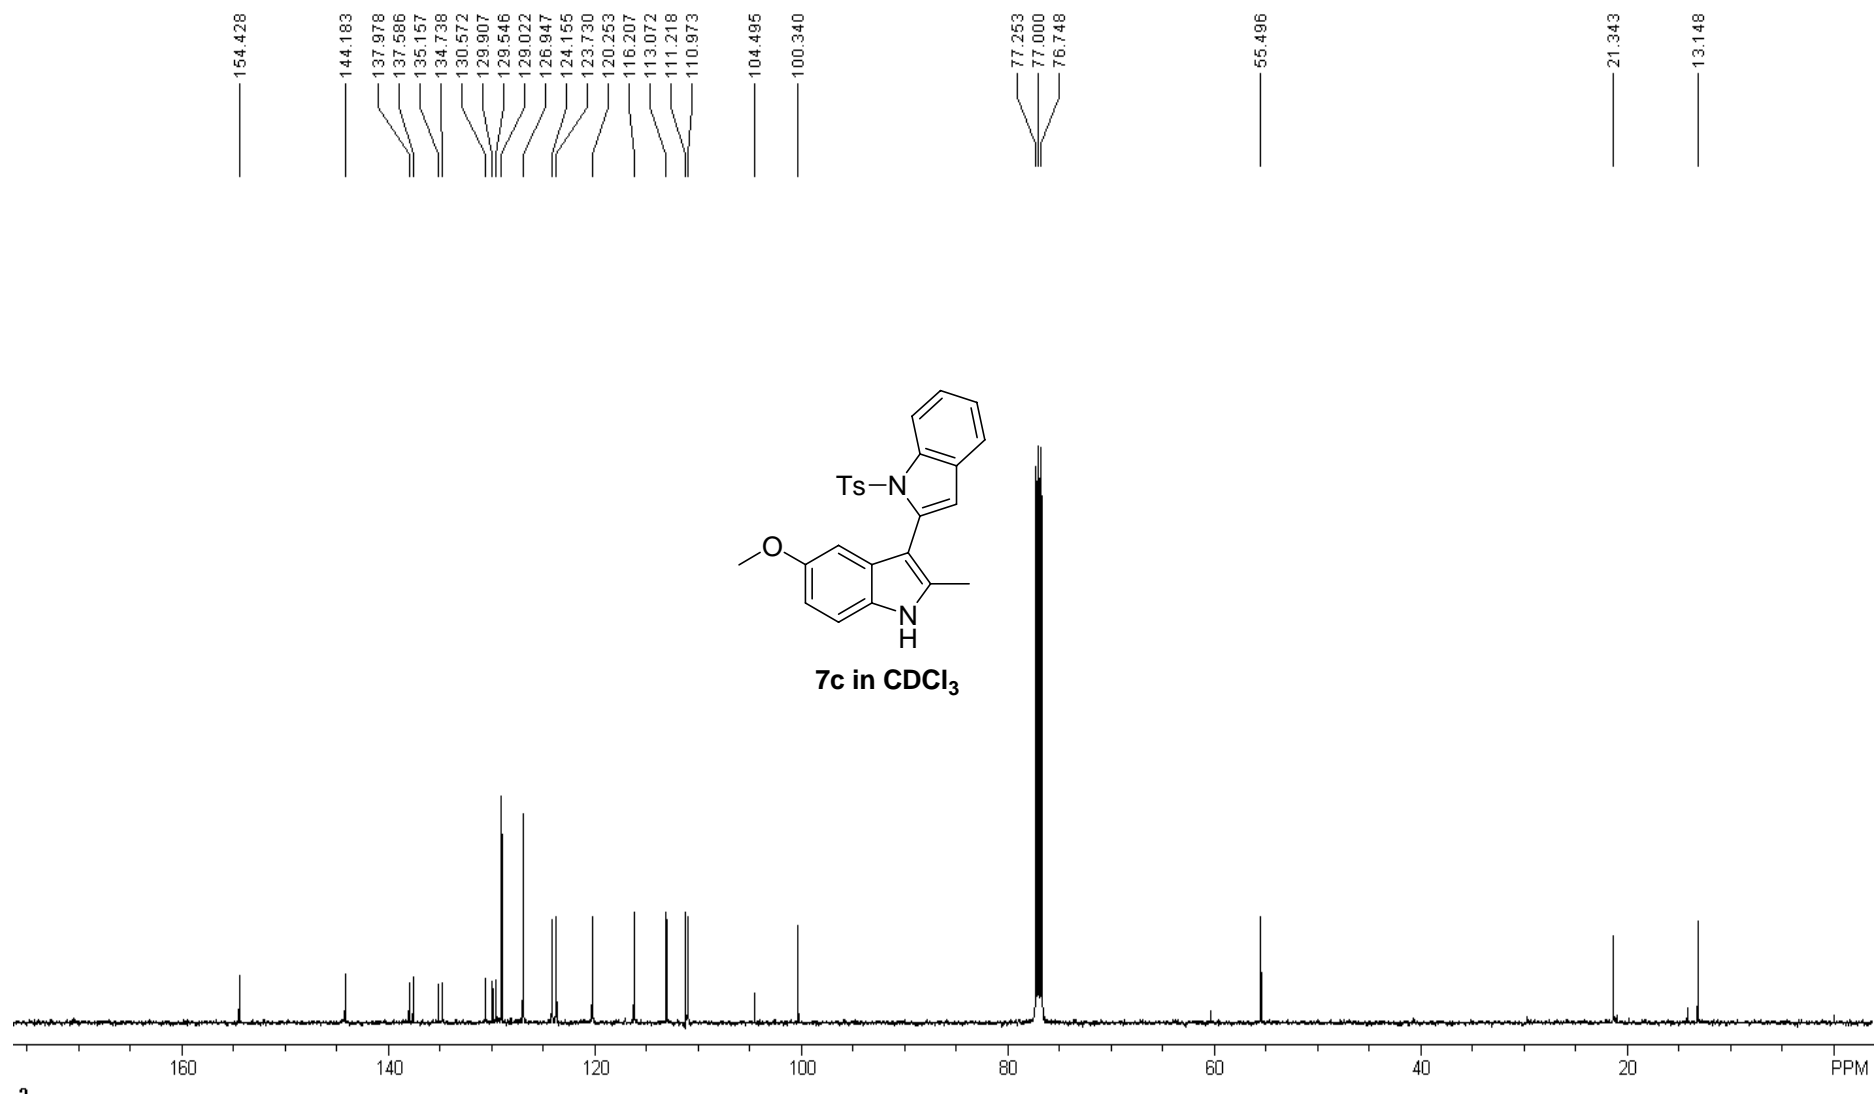

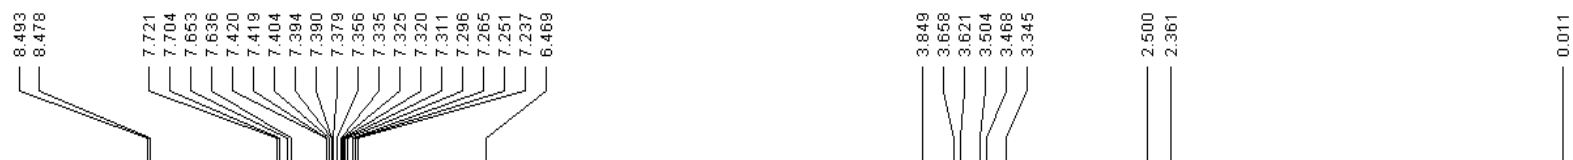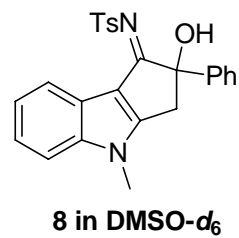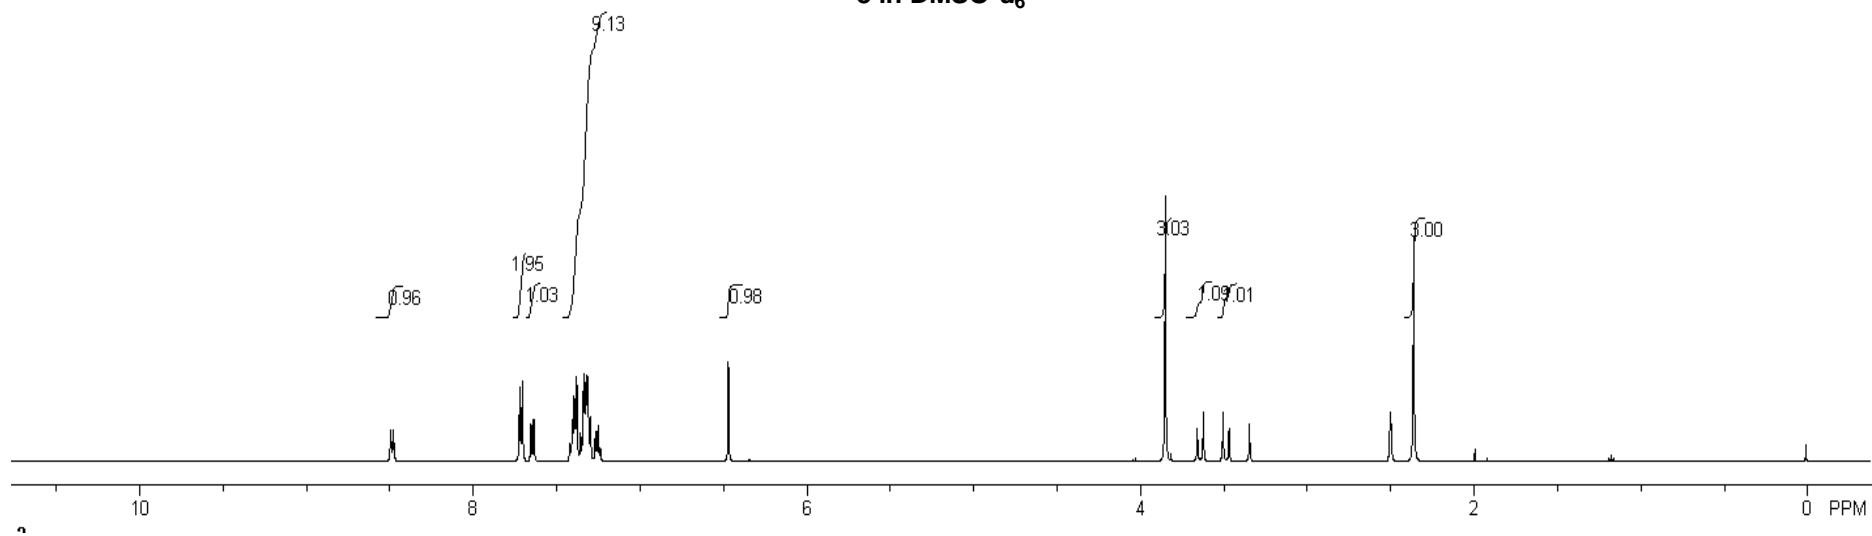

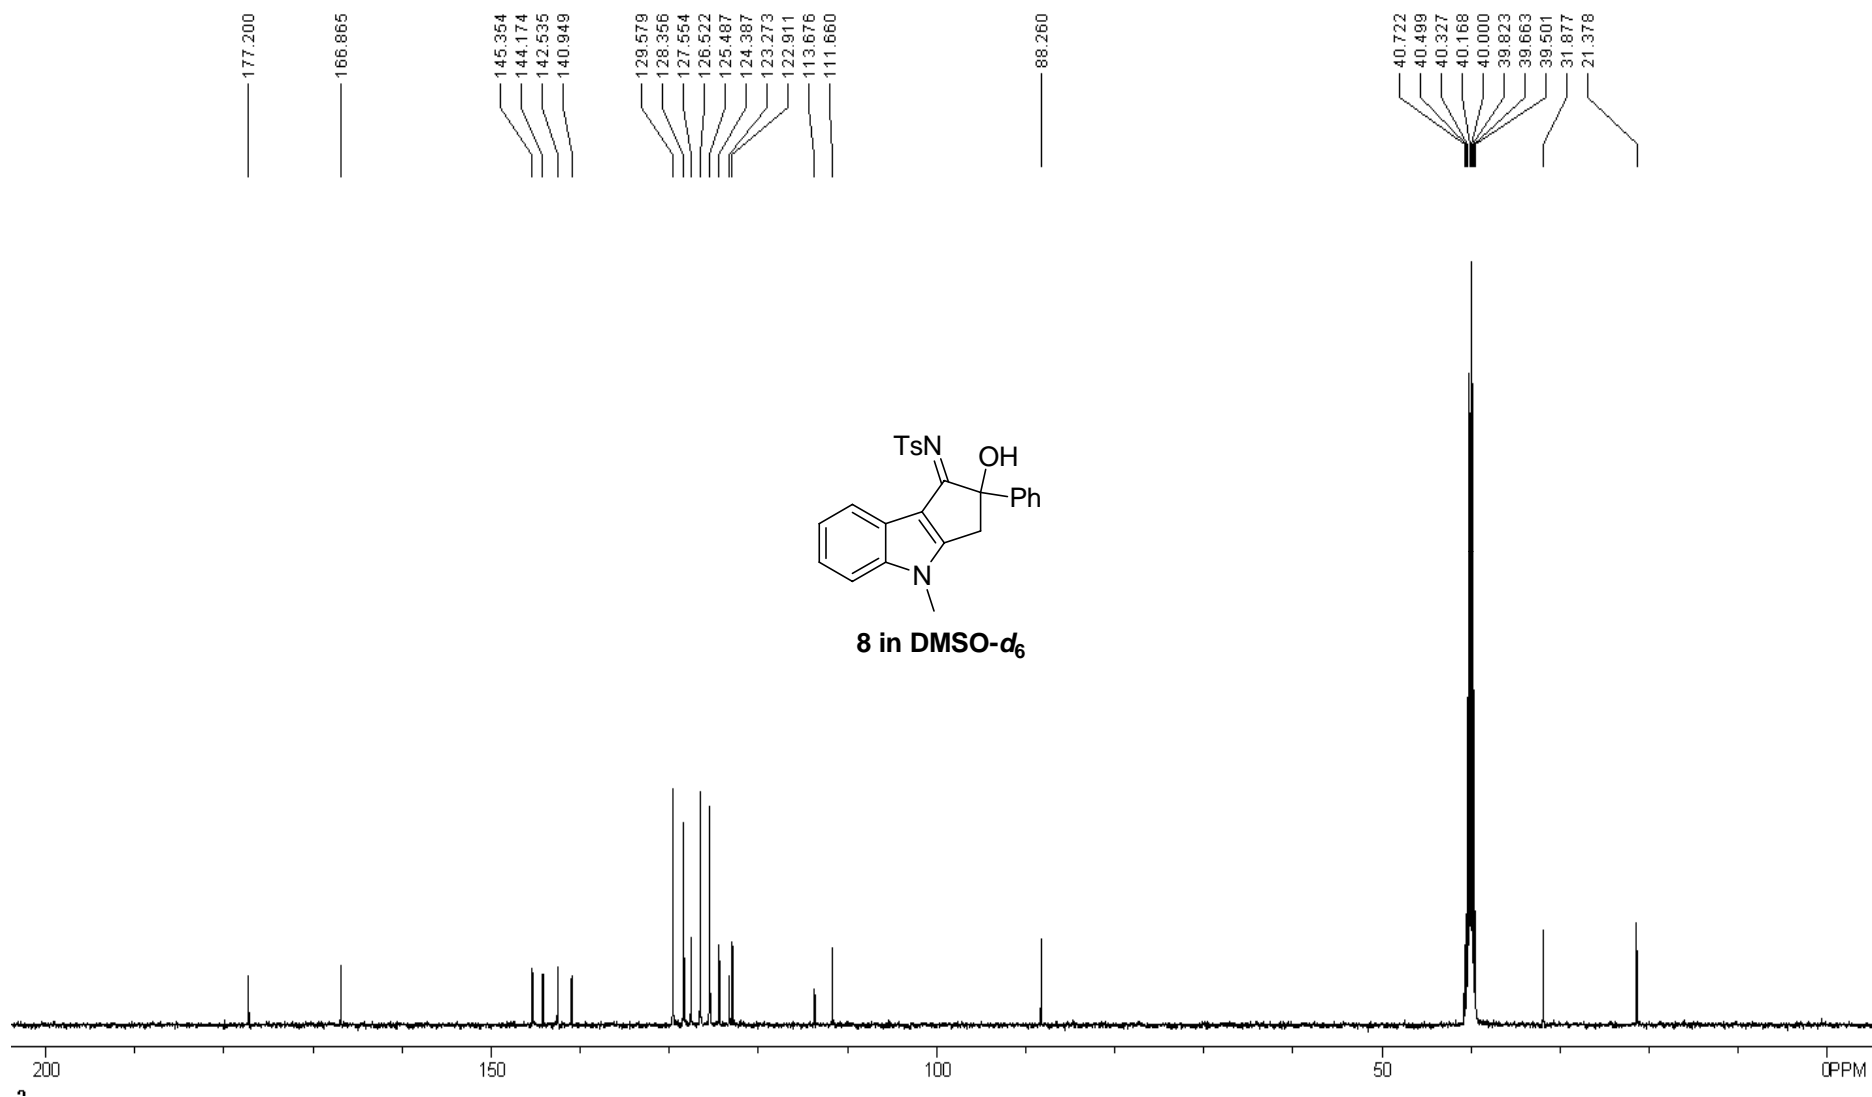

Supplement: c0cc04922k.pdf [file c0cc04922k.pdf]
